# Supplementary material
Source: publisher figshare collection journal article supplement (https://brill.figshare.com/ndownloader/files/34812733)
Supplement: Supplementary file 1 [file 34812733]

## Sheet: Sheet1
ID	A1	A2	A3	B1	B2	B3	C1	C2	C3	D1	D2	D3	E1	E2	E3	F1	F2	F3	NR_def	GO_ID	GO_term	KO_ID	KO_gene	Hyperlink	KEGG Pathway	Pathway ID	Kog_Annotation	Swiss-Prot_Id	Swiss-Prot_Annotation
A1CF	0.866287	0.936011	0.860338	0.419956	0.675778	0.608526	1.29137	1.1345	1.03543	1.197	1.1685	1.06521	0.833147	1.23376	1.13956	0.783189	0.841359	1.03782	PREDICTED: APOBEC1 complementation factor isoform X2 [Pelodiscus sinensis];PREDICTED: APOBEC1 complementation factor isoform X3 [Pelodiscus sinensis];PREDICTED: APOBEC1 complementation factor isoform X4 [Pelodiscus sinensis];PREDICTED: APOBEC1 complementation factor isoform X1 [Pelodiscus sinensis]	GO:0016554;GO:0005737;GO:0005654;GO:0003725;GO:0003723;GO:0050821;GO:0010609;GO:0000166;GO:0006397;GO:0003676;GO:0005783;GO:0030895;GO:0005515;GO:0016556;GO:0003727;GO:0005634	cytidine to uridine editing;cytoplasm;nucleoplasm;double-stranded RNA binding;RNA binding;protein stabilization;mRNA localization resulting in posttranscriptional regulation of gene expression;nucleotide binding;mRNA processing;nucleic acid binding;endoplasmic reticulum;apolipoprotein B mRNA editing enzyme complex;protein binding;mRNA modification;single-stranded RNA binding;nucleus	-	-	-	-	-	KOG0123(AJ)(Polyadenylate-binding protein (RRM superfamily))	sp|Q5R9H4|A1CF_PONAB;gnl|BL_ORD_ID|264392;sp|Q9NQ94|A1CF_HUMAN;gnl|BL_ORD_ID|265842	sp|Q5R9H4|A1CF_PONAB APOBEC1 complementation factor OS=Pongo abelii GN=A1CF PE=2 SV=1;sp|Q9NQ94|A1CF_HUMAN APOBEC1 complementation factor OS=Homo sapiens GN=A1CF PE=1 SV=1;sp|Q9NQ94|A1CF_HUMAN APOBEC1 complementation factor OS=Homo sapiens GN=A1CF PE=1 SV=1;sp|Q5R9H4|A1CF_PONAB APOBEC1 complementation factor OS=Pongo abelii GN=A1CF PE=2 SV=1
AACS	0.991226	1.09342	0.880814	0.770115	0.4843	0.683947	0.90309	0.941511	0.854306	0.632457	0.61595	0.824776	0.758155	0.623249	0.645422	0.346353	0.577492	0.570543	PREDICTED: acetoacetyl-CoA synthetase [Chrysemys picta bellii];PREDICTED: acetoacetyl-CoA synthetase [Pelodiscus sinensis]	GO:0005737;GO:0008152;GO:0003824;GO:0005524;GO:0005829;GO:0006629;GO:0000166;GO:0016874;GO:0030729;GO:0006631	cytoplasm;metabolic process;catalytic activity;ATP binding;cytosol;lipid metabolic process;nucleotide binding;ligase activity;acetoacetate-CoA ligase activity;fatty acid metabolic process	K01907	AACS,acsA	http://www.genome.jp/dbget-bin/www_bget?ko:K01907	Valine, leucine and isoleucine degradation;Butanoate metabolism	ko00280,ko00650	KOG1175(I)(Acyl-CoA synthetase)	gnl|BL_ORD_ID|263819;sp|Q5ZLG0|AACS_CHICK	sp|Q5ZLG0|AACS_CHICK Acetoacetyl-CoA synthetase OS=Gallus gallus GN=AACS PE=2 SV=1;sp|Q5ZLG0|AACS_CHICK Acetoacetyl-CoA synthetase OS=Gallus gallus GN=AACS PE=2 SV=1
ABCA1	0.553883	0.401401	0.513218	0.591065	0.808886	0.653213	1.07482	0.861534	0.744293	1.05614	1.14675	1.11528	0.466868	0.908485	0.69897	0.786751	0.686636	0.733999	PREDICTED: ATP-binding cassette sub-family A member 1 [Pelodiscus sinensis]	-	-	K05641	ABCA1	http://www.genome.jp/dbget-bin/www_bget?ko:K05641	ABC transporters;Fat digestion and absorption	ko02010,ko04975	KOG0059(IR)(Lipid exporter ABCA1 and related proteins, ABC superfamily)	sp|O95477|ABCA1_HUMAN;gnl|BL_ORD_ID|261281	sp|O95477|ABCA1_HUMAN ATP-binding cassette sub-family A member 1 OS=Homo sapiens GN=ABCA1 PE=1 SV=3;sp|O95477|ABCA1_HUMAN ATP-binding cassette sub-family A member 1 OS=Homo sapiens GN=ABCA1 PE=1 SV=3
ABCA13	0.494155	0.755112	0.591065	0.198657	0.324282	0.217484	0.459392	0.432969	0.426511	0.491362	0.578639	0.380211	0.783189	0.660865	0.841985	0.630428	0.745075	0.835056	PREDICTED: ATP-binding cassette sub-family A member 13 [Pelodiscus sinensis]	-	-	K05647	ABCA13	http://www.genome.jp/dbget-bin/www_bget?ko:K05647	ABC transporters	ko02010	KOG0059(IR)(Lipid exporter ABCA1 and related proteins, ABC superfamily)	gnl|BL_ORD_ID|263893;sp|Q86UQ4|ABCAD_HUMAN	sp|Q86UQ4|ABCAD_HUMAN ATP-binding cassette sub-family A member 13 OS=Homo sapiens GN=ABCA13 PE=2 SV=3;sp|Q86UQ4|ABCAD_HUMAN ATP-binding cassette sub-family A member 13 OS=Homo sapiens GN=ABCA13 PE=2 SV=3
ABCB5	0.4843	0.495544	0.385606	0.599883	0.20412	0.583199	0.584331	0.746634	0.61595	1.17348	0.987219	0.64836	0.860338	0.980912	1.13893	1.28126	1.13577	1.1209	PREDICTED: ATP-binding cassette sub-family B member 5 isoform X1 [Pelodiscus sinensis];PREDICTED: ATP-binding cassette sub-family B member 5 isoform X2 [Pelodiscus sinensis]	GO:0005524;GO:0006810;GO:0002489;GO:0016021;GO:0055085;GO:0048058;GO:0002485;GO:0016020;GO:0015562;GO:0005887;GO:0000166;GO:0042391;GO:0002591;GO:0016887;GO:0002481;GO:0042626	ATP binding;transport;antigen processing and presentation of endogenous peptide antigen via MHC class Ib via ER pathway, TAP-dependent;integral component of membrane;transmembrane transport;compound eye corneal lens development;antigen processing and presentation of endogenous peptide antigen via MHC class I via ER pathway, TAP-dependent;membrane;efflux transmembrane transporter activity;integral…	K05660	ABCB5	http://www.genome.jp/dbget-bin/www_bget?ko:K05660	ABC transporters	ko02010	KOG0055(Q)(Multidrug/pheromone exporter, ABC superfamily)	sp|Q2M3G0|ABCB5_HUMAN;gnl|BL_ORD_ID|264535	sp|Q2M3G0|ABCB5_HUMAN ATP-binding cassette sub-family B member 5 OS=Homo sapiens GN=ABCB5 PE=1 SV=4;sp|Q2M3G0|ABCB5_HUMAN ATP-binding cassette sub-family B member 5 OS=Homo sapiens GN=ABCB5 PE=1 SV=4
ABCC8	0.526339	0.580925	0.52763	0.694605	0.550228	0.555094	0.390935	0.459392	0.603144	0.495544	0.502427	0.535294	0.230449	0.139879	0.0934217	0.103804	0.193125	0.25042	PREDICTED: ATP-binding cassette sub-family C member 8 isoform X1 [Chelonia mydas];PREDICTED: ATP-binding cassette sub-family C member 8 isoform X4 [Chrysemys picta bellii];PREDICTED: ATP-binding cassette sub-family C member 8 isoform X2 [Chelonia mydas];PREDICTED: ATP-binding cassette sub-family C member 8 isoform X3 [Chrysemys picta bellii];PREDICTED: ATP-binding cassette sub-family C member 8 […	GO:0005524;GO:0006810;GO:0008281;GO:0016021;GO:0055085;GO:0016020;GO:0006813;GO:0000166;GO:0016887;GO:0042626	ATP binding;transport;sulfonylurea receptor activity;integral component of membrane;transmembrane transport;membrane;potassium ion transport;nucleotide binding;ATPase activity;ATPase activity, coupled to transmembrane movement of substances	K05032	ABCC8,SUR1	http://www.genome.jp/dbget-bin/www_bget?ko:K05032	ABC transporters;Insulin secretion	ko02010,ko04911	KOG0054(Q)(Multidrug resistance-associated protein/mitoxantrone resistance protein, ABC superfamily)	gnl|BL_ORD_ID|267189;sp|Q09429|ABCC8_RAT	sp|Q09429|ABCC8_RAT ATP-binding cassette sub-family C member 8 OS=Rattus norvegicus GN=Abcc8 PE=1 SV=4;sp|Q09429|ABCC8_RAT ATP-binding cassette sub-family C member 8 OS=Rattus norvegicus GN=Abcc8 PE=1 SV=4
ABCC9	0.899273	0.627366	0.62941	1.09061	0.977266	1.17289	1.03782	1.00389	1.07846	1.06221	0.943	1.30771	0.296665	0.385606	0.30963	0.418301	0.354108	0.426511	PREDICTED: ATP-binding cassette sub-family C member 9 isoform X1 [Pelodiscus sinensis];PREDICTED: ATP-binding cassette sub-family C member 9 isoform X2 [Pelodiscus sinensis];PREDICTED: ATP-binding cassette sub-family C member 9 isoform X6 [Pelodiscus sinensis];PREDICTED: ATP-binding cassette sub-family C member 9 isoform X3 [Pelodiscus sinensis];PREDICTED: ATP-binding cassette sub-family C member…	-	-	K05033	ABCC9,SUR2	http://www.genome.jp/dbget-bin/www_bget?ko:K05033	ABC transporters	ko02010	KOG0054(Q)(Multidrug resistance-associated protein/mitoxantrone resistance protein, ABC superfamily)	gnl|BL_ORD_ID|266655;sp|O60706|ABCC9_HUMAN;sp|Q09429|ABCC8_RAT	sp|O60706|ABCC9_HUMAN ATP-binding cassette sub-family C member 9 OS=Homo sapiens GN=ABCC9 PE=1 SV=2;sp|O60706|ABCC9_HUMAN ATP-binding cassette sub-family C member 9 OS=Homo sapiens GN=ABCC9 PE=1 SV=2;sp|Q09429|ABCC8_RAT ATP-binding cassette sub-family C member 8 OS=Rattus norvegicus GN=Abcc8 PE=1 SV=4
ABHD2	0.832509	0.795185	0.708421	0.627366	0.847573	0.69897	0.991226	0.993436	0.991669	1.09795	0.933993	0.946452	0.750508	1.02735	0.829947	0.691965	0.69897	0.829304	PREDICTED: abhydrolase domain-containing protein 2 [Pelodiscus sinensis];PREDICTED: abhydrolase domain-containing protein 2 isoform X2 [Galeopterus variegatus]	-	-	K13697	ABHD2	http://www.genome.jp/dbget-bin/www_bget?ko:K13697	-	-	KOG1838(R)(Alpha/beta hydrolase)	sp|Q9QXM0|ABHD2_MOUSE;sp|P08910|ABHD2_HUMAN;gnl|BL_ORD_ID|266007	sp|Q9QXM0|ABHD2_MOUSE Monoacylglycerol lipase ABHD2 OS=Mus musculus GN=Abhd2 PE=1 SV=1;sp|P08910|ABHD2_HUMAN Monoacylglycerol lipase ABHD2 OS=Homo sapiens GN=ABHD2 PE=1 SV=1;sp|Q9QXM0|ABHD2_MOUSE Monoacylglycerol lipase ABHD2 OS=Mus musculus GN=Abhd2 PE=1 SV=1
ABHD3	0.879096	0.970347	0.801404	0.876795	0.925312	0.94939	1.2634	1.25237	1.11959	1.03503	1.08027	0.989895	0.865104	1.086	1.10653	0.710963	0.892095	0.750508	PREDICTED: phospholipase ABHD3 isoform X2 [Tupaia chinensis];PREDICTED: phospholipase ABHD3 [Pelodiscus sinensis]	GO:0004623;GO:0008970;GO:0016021;GO:0016020;GO:0046470;GO:0016787	phospholipase A2 activity;phosphatidylcholine 1-acylhydrolase activity;integral component of membrane;membrane;phosphatidylcholine metabolic process;hydrolase activity	K13696	ABHD1_3	http://www.genome.jp/dbget-bin/www_bget?ko:K13696	-	-	KOG1838(R)(Alpha/beta hydrolase)	sp|Q91ZH7|ABHD3_MOUSE;sp|Q0VC00|ABHD3_BOVIN;gnl|BL_ORD_ID|261306;sp|Q8WU67|ABHD3_HUMAN	sp|Q91ZH7|ABHD3_MOUSE Phospholipase ABHD3 OS=Mus musculus GN=Abhd3 PE=1 SV=1;sp|Q0VC00|ABHD3_BOVIN Phospholipase ABHD3 OS=Bos taurus GN=ABHD3 PE=2 SV=1;sp|Q8WU67|ABHD3_HUMAN Phospholipase ABHD3 OS=Homo sapiens GN=ABHD3 PE=1 SV=2;sp|Q8WU67|ABHD3_HUMAN Phospholipase ABHD3 OS=Homo sapiens GN=ABHD3 PE=1 SV=2
ACE2	0.663701	0.671173	0.658011	0.365488	0.555094	0.856124	1.09517	0.899273	0.810233	0.952308	0.764923	0.805501	0.733197	1.4627	1.04727	0.860937	0.977724	0.881385	PREDICTED: angiotensin-converting enzyme 2 [Pelodiscus sinensis]	GO:0008233;GO:0005737;GO:0032800;GO:0070062;GO:0005886;GO:1903779;GO:0008241;GO:0003051;GO:0016021;GO:0001618;GO:1903598;GO:0016020;GO:0008237;GO:0005576;GO:0004175;GO:0005615;GO:0016787;GO:0006508;GO:0004180;GO:0015827;GO:0060452;GO:0009986;GO:0046872;GO:0003081;GO:0001948;GO:0046813	peptidase activity;cytoplasm;receptor biosynthetic process;extracellular exosome;plasma membrane;regulation of cardiac conduction;peptidyl-dipeptidase activity;angiotensin-mediated drinking behavior;integral component of membrane;virus receptor activity;positive regulation of gap junction assembly;membrane;metallopeptidase activity;extracellular region;endopeptidase activity;extracellular space;h…	K09708	ACE2,ACEH	http://www.genome.jp/dbget-bin/www_bget?ko:K09708	Protein digestion and absorption;Renin-angiotensin system	ko04974,ko04614	KOG3690(E)(Angiotensin I-converting enzymes - M2 family peptidases)	sp|Q5RFN1|ACE2_PONAB;gnl|BL_ORD_ID|270082;sp|Q56NL1|ACE2_PAGLA	sp|Q5RFN1|ACE2_PONAB Angiotensin-converting enzyme 2 OS=Pongo abelii GN=ACE2 PE=2 SV=1;sp|Q56NL1|ACE2_PAGLA Angiotensin-converting enzyme 2 OS=Paguma larvata GN=ACE2 PE=1 SV=1;sp|Q56NL1|ACE2_PAGLA Angiotensin-converting enzyme 2 OS=Paguma larvata GN=ACE2 PE=1 SV=1
ACER3	0.574031	0.61595	0.542825	0.525045	0.546543	0.502427	0.936514	0.880814	0.753583	0.932981	0.836324	0.895975	0.357935	0.60206	0.468347	0.474216	0.439333	0.498311	PREDICTED: alkaline ceramidase 3, partial [Pelodiscus sinensis]	-	-	K04711	ACER3,YDC1	http://www.genome.jp/dbget-bin/www_bget?ko:K04711	Sphingolipid metabolism	ko00600	-	gnl|BL_ORD_ID|270112;sp|Q9NUN7|ACER3_HUMAN	sp|Q9NUN7|ACER3_HUMAN Alkaline ceramidase 3 OS=Homo sapiens GN=ACER3 PE=1 SV=3;sp|Q9NUN7|ACER3_HUMAN Alkaline ceramidase 3 OS=Homo sapiens GN=ACER3 PE=1 SV=3
ACHE	0.658965	0.445604	0.485721	1.23096	1.26364	1.10175	1.1014	1.07408	1.09621	1.16227	1.15381	1.25358	0.705864	0.767898	0.765669	0.923762	0.764923	0.857935	PREDICTED: LOW QUALITY PROTEIN: acetylcholinesterase [Pelodiscus sinensis]	-	-	K01049	ACHE	http://www.genome.jp/dbget-bin/www_bget?ko:K01049	Glycerophospholipid metabolism;Cholinergic synapse	ko00564,ko04725	KOG4389(T)(Acetylcholinesterase/Butyrylcholinesterase)	gnl|BL_ORD_ID|264096;sp|Q92035|ACES_BUNFA	sp|Q92035|ACES_BUNFA Acetylcholinesterase OS=Bungarus fasciatus GN=ACHE PE=1 SV=2;sp|Q92035|ACES_BUNFA Acetylcholinesterase OS=Bungarus fasciatus GN=ACHE PE=1 SV=2
ACKR4	0.564666	0.819544	0.764923	0.605305	0.613842	0.568202	0.729974	0.906335	0.753583	0.568202	0.799341	0.678518	1.19424	0.801404	0.600973	0.741152	1.16584	0.968483	PREDICTED: atypical chemokine receptor 4 [Pelodiscus sinensis]	GO:0006935;GO:0005044;GO:0004950;GO:0016021;GO:0007186;GO:0016020;GO:0019956;GO:0004871;GO:0007165;GO:0070098;GO:0004930	chemotaxis;scavenger receptor activity;chemokine receptor activity;integral component of membrane;G-protein coupled receptor signaling pathway;membrane;chemokine binding;signal transducer activity;signal transduction;chemokine-mediated signaling pathway;G-protein coupled receptor activity	K04186	CCRL1,CCR11	http://www.genome.jp/dbget-bin/www_bget?ko:K04186	-	-	-	gnl|BL_ORD_ID|269544	sp|Q924I3|ACKR4_MOUSE Atypical chemokine receptor 4 OS=Mus musculus GN=Ackr4 PE=1 SV=1
ACOT12	0.74351	0.950365	0.766413	0.643453	0.661813	0.673942	0.829947	0.704151	0.878522	0.954243	0.674861	0.790988	1.15897	1.21484	1.35025	1.15168	1.30428	1.42927	PREDICTED: acyl-coenzyme A thioesterase 12 [Pelodiscus sinensis]	-	-	K01067	E3.1.2.1,ACH1	http://www.genome.jp/dbget-bin/www_bget?ko:K01067	Pyruvate metabolism	ko00620	-	gnl|BL_ORD_ID|272119;sp|Q99NB7|ACO12_RAT;sp|Q8WYK0|ACO12_HUMAN	sp|Q8WYK0|ACO12_HUMAN Acyl-coenzyme A thioesterase 12 OS=Homo sapiens GN=ACOT12 PE=1 SV=1;sp|Q99NB7|ACO12_RAT Acyl-coenzyme A thioesterase 12 OS=Rattus norvegicus GN=Acot12 PE=1 SV=1;sp|Q8WYK0|ACO12_HUMAN Acyl-coenzyme A thioesterase 12 OS=Homo sapiens GN=ACOT12 PE=1 SV=1
ACSBG1	0.491362	0.540329	0.4133	0.453318	0.62941	0.451786	0.676694	0.654177	0.658965	0.673021	0.822822	0.544068	0.701568	0.685742	0.78533	0.586587	0.807535	0.778874	PREDICTED: long-chain-fatty-acid--CoA ligase ACSBG1 isoform X2 [Pelodiscus sinensis];PREDICTED: long-chain-fatty-acid--CoA ligase ACSBG1 isoform X6 [Pelodiscus sinensis];PREDICTED: long-chain-fatty-acid--CoA ligase ACSBG1 isoform X1 [Pelodiscus sinensis];PREDICTED: long-chain-fatty-acid--CoA ligase ACSBG1 isoform X5 [Pelodiscus sinensis];PREDICTED: long-chain-fatty-acid--CoA ligase ACSBG1 isoform…	-	-	K15013	ACSBG	http://www.genome.jp/dbget-bin/www_bget?ko:K15013	Fatty acid biosynthesis;Fatty acid degradation;Fatty acid metabolism;Adipocytokine signaling pathway;PPAR signaling pathway	ko00061,ko00071,ko01212,ko04920,ko03320	KOG1180(I)(Acyl-CoA synthetase);KOG1256(I)(Long-chain acyl-CoA synthetases (AMP-forming))	gnl|BL_ORD_ID|266705;sp|Q2KHW5|ACBG1_BOVIN	sp|Q2KHW5|ACBG1_BOVIN Long-chain-fatty-acid--CoA ligase ACSBG1 OS=Bos taurus GN=ACSBG1 PE=2 SV=1;sp|Q2KHW5|ACBG1_BOVIN Long-chain-fatty-acid--CoA ligase ACSBG1 OS=Bos taurus GN=ACSBG1 PE=2 SV=1
ACSS3	0.671173	0.690196	0.715167	0.691081	0.4843	0.609594	0.959995	0.897627	0.764923	1.0162	0.900367	0.854913	0.766413	0.793092	0.941014	0.822168	0.800029	0.828015	PREDICTED: acyl-CoA synthetase short-chain family member 3, mitochondrial isoform X2 [Bos taurus];PREDICTED: acyl-CoA synthetase short-chain family member 3, mitochondrial isoform X2 [Pteropus vampyrus];PREDICTED: acyl-CoA synthetase short-chain family member 3, mitochondrial [Pelodiscus sinensis]	GO:0008152;GO:0003824;GO:0005524;GO:0005739;GO:0003987	metabolic process;catalytic activity;ATP binding;mitochondrion;acetate-CoA ligase activity	K01908	prpE	http://www.genome.jp/dbget-bin/www_bget?ko:K01908	Propanoate metabolism	ko00640	KOG1175(I)(Acyl-CoA synthetase)	gnl|BL_ORD_ID|272686;sp|Q14DH7|ACSS3_MOUSE	sp|Q14DH7|ACSS3_MOUSE Acyl-CoA synthetase short-chain family member 3, mitochondrial OS=Mus musculus GN=Acss3 PE=1 SV=2;sp|Q14DH7|ACSS3_MOUSE Acyl-CoA synthetase short-chain family member 3, mitochondrial OS=Mus musculus GN=Acss3 PE=1 SV=2
ACTN3	0.238046	0.133539	0.227887	0.311754	0.372912	0.382017	0.338456	0.322219	0.255273	0.214844	0.305351	0.294466	0.0827854	0.0334238	0.0791812	0.276462	0.257679	1.22246	PREDICTED: alpha-actinin-3 isoform X2 [Pelodiscus sinensis];PREDICTED: alpha-actinin-3 isoform X3 [Pelodiscus sinensis];PREDICTED: alpha-actinin-3 isoform X1 [Pelodiscus sinensis]	GO:0005509;GO:0003779	calcium ion binding;actin binding	K05699	ACTN	http://www.genome.jp/dbget-bin/www_bget?ko:K05699	Regulation of actin cytoskeleton;Adherens junction;Focal adhesion;Tight junction;Leukocyte transendothelial migration	ko04810,ko04520,ko04510,ko04530,ko04670	KOG0040(Z)(Ca2+-binding actin-bundling protein (spectrin), alpha chain (EF-Hand protein superfamily))	sp|O88990|ACTN3_MOUSE;gnl|BL_ORD_ID|262693	sp|O88990|ACTN3_MOUSE Alpha-actinin-3 OS=Mus musculus GN=Actn3 PE=2 SV=1;sp|O88990|ACTN3_MOUSE Alpha-actinin-3 OS=Mus musculus GN=Actn3 PE=2 SV=1
ACVR2B	0.330414	0.322219	0.260071	0.123852	0.187521	0.190332	0.62634	0.603144	0.469822	0.696356	0.661813	0.609594	0.143015	0.243038	0.127105	0.170262	0.243038	0.245513	PREDICTED: activin receptor type-2B [Pelodiscus sinensis]	GO:0004672;GO:0007178;GO:0005524;GO:0004674;GO:0016310;GO:0016301;GO:0016740;GO:0016021;GO:0016020;GO:0004702;GO:0000166;GO:0004675;GO:0006468;GO:0046872	protein kinase activity;transmembrane receptor protein serine/threonine kinase signaling pathway;ATP binding;protein serine/threonine kinase activity;phosphorylation;kinase activity;transferase activity;integral component of membrane;membrane;signal transducer, downstream of receptor, with serine/threonine kinase activity;nucleotide binding;transmembrane receptor protein serine/threonine kinase a…	K13596	ACVR2B	http://www.genome.jp/dbget-bin/www_bget?ko:K13596	Signaling pathways regulating pluripotency of stem cells;TGF-beta signaling pathway;Cytokine-cytokine receptor interaction	ko04550,ko04350,ko04060	KOG2052(T)(Activin A type IB receptor, serine/threonine protein kinase)	gnl|BL_ORD_ID|299688;sp|Q90670|AVR2B_CHICK	sp|Q90670|AVR2B_CHICK Activin receptor type-2B OS=Gallus gallus GN=ACVR2B PE=2 SV=1;sp|Q90670|AVR2B_CHICK Activin receptor type-2B OS=Gallus gallus GN=ACVR2B PE=2 SV=1
ACVRL1	0.369216	0.127105	0.281033	0.506505	0.580925	0.332438	0.522444	0.518514	0.44248	0.595496	0.574031	0.706718	0.0827854	0.113943	0.075547	0.113943	0.103804	0.103804	PREDICTED: serine/threonine-protein kinase receptor R3 [Pelodiscus sinensis]	-	-	K13594	ACVRL1,ALK1	http://www.genome.jp/dbget-bin/www_bget?ko:K13594	-	-	KOG2052(T)(Activin A type IB receptor, serine/threonine protein kinase)	sp|P37023|ACVL1_HUMAN;gnl|BL_ORD_ID|262719	sp|P37023|ACVL1_HUMAN Serine/threonine-protein kinase receptor R3 OS=Homo sapiens GN=ACVRL1 PE=1 SV=2;sp|P37023|ACVL1_HUMAN Serine/threonine-protein kinase receptor R3 OS=Homo sapiens GN=ACVRL1 PE=1 SV=2
ADAM28	0.574031	1.06408	1.05994	0.741152	0.795185	0.69897	0.991669	0.902547	1.03703	1.15594	1.02816	0.901458	1.51095	1.02898	1.19285	1.4685	1.22943	1.55084	PREDICTED: disintegrin and metalloproteinase domain-containing protein 28 [Pelodiscus sinensis]	GO:0016021;GO:0016020;GO:0004222;GO:0008237;GO:0006508;GO:0008270	integral component of membrane;membrane;metalloendopeptidase activity;metallopeptidase activity;proteolysis;zinc ion binding	K08614	ADAM28	http://www.genome.jp/dbget-bin/www_bget?ko:K08614	-	-	KOG3607(O)(Meltrins, fertilins and related Zn-dependent metalloproteinases of the ADAMs family)	sp|Q9XSL6|ADA28_MACFA;sp|Q9UKQ2|ADA28_HUMAN;sp|A8QL59|VM3_NAJAT;gnl|BL_ORD_ID|269771	sp|Q9XSL6|ADA28_MACFA Disintegrin and metalloproteinase domain-containing protein 28 OS=Macaca fascicularis GN=ADAM28 PE=2 SV=1;sp|Q9UKQ2|ADA28_HUMAN Disintegrin and metalloproteinase domain-containing protein 28 OS=Homo sapiens GN=ADAM28 PE=2 SV=3;sp|A8QL59|VM3_NAJAT Zinc metalloproteinase-disintegrin-like NaMP OS=Naja atra PE=2 SV=1;sp|Q9XSL6|ADA28_MACFA Disintegrin and metalloproteinase domain…
ADAMTS15	0.071882	0.0530784	0.120574	0.495544	0.586587	0.243038	0.558709	0.584331	0.463893	0.4843	0.577492	1.1116	0.049218	0.0899051	0.10721	0.064458	0.184691	0.103804	PREDICTED: A disintegrin and metalloproteinase with thrombospondin motifs 15, partial [Pelodiscus sinensis]	GO:0031012;GO:0050840;GO:0008201;GO:0004222;GO:0008237;GO:0004175;GO:0005615;GO:0006508;GO:0008270;GO:0005578;GO:0009986	extracellular matrix;extracellular matrix binding;heparin binding;metalloendopeptidase activity;metallopeptidase activity;endopeptidase activity;extracellular space;proteolysis;zinc ion binding;proteinaceous extracellular matrix;cell surface	K08629	ADAMTS15	http://www.genome.jp/dbget-bin/www_bget?ko:K08629	-	-	KOG3538(O)(Disintegrin metalloproteinases with thrombospondin repeats)	sp|Q8TE58|ATS15_HUMAN;gnl|BL_ORD_ID|298157	sp|Q8TE58|ATS15_HUMAN A disintegrin and metalloproteinase with thrombospondin motifs 15 OS=Homo sapiens GN=ADAMTS15 PE=2 SV=1;sp|Q8TE58|ATS15_HUMAN A disintegrin and metalloproteinase with thrombospondin motifs 15 OS=Homo sapiens GN=ADAMTS15 PE=2 SV=1
ADAMTS17	0.781037	0.693727	0.687529	0.864511	0.833784	0.881385	0.879669	0.755112	0.744293	0.873321	0.904716	0.850033	0.376577	0.394452	0.451786	0.584331	0.563481	0.553883	PREDICTED: A disintegrin and metalloproteinase with thrombospondin motifs 17 [Pelodiscus sinensis]	-	-	K08631	ADAMTS17	http://www.genome.jp/dbget-bin/www_bget?ko:K08631	-	-	KOG3538(O)(Disintegrin metalloproteinases with thrombospondin repeats)	gnl|BL_ORD_ID|298158;sp|Q8TE56|ATS17_HUMAN	sp|Q8TE56|ATS17_HUMAN A disintegrin and metalloproteinase with thrombospondin motifs 17 OS=Homo sapiens GN=ADAMTS17 PE=2 SV=2;sp|Q8TE56|ATS17_HUMAN A disintegrin and metalloproteinase with thrombospondin motifs 17 OS=Homo sapiens GN=ADAMTS17 PE=2 SV=2
ADAMTS19	0.62941	0.594393	0.598791	0.961421	0.885926	0.748963	0.854913	0.759668	0.627366	0.682145	0.769377	0.729974	0.158362	0.09691	0.0827854	0.675778	0.394452	0.509203	PREDICTED: LOW QUALITY PROTEIN: A disintegrin and metalloproteinase with thrombospondin motifs 19 [Pelodiscus sinensis]	-	-	K08633	ADAMTS19	http://www.genome.jp/dbget-bin/www_bget?ko:K08633	-	-	KOG3538(O)(Disintegrin metalloproteinases with thrombospondin repeats)	gnl|BL_ORD_ID|298159;sp|Q8TE59|ATS19_HUMAN	sp|Q8TE59|ATS19_HUMAN A disintegrin and metalloproteinase with thrombospondin motifs 19 OS=Homo sapiens GN=ADAMTS19 PE=2 SV=2;sp|Q8TE59|ATS19_HUMAN A disintegrin and metalloproteinase with thrombospondin motifs 19 OS=Homo sapiens GN=ADAMTS19 PE=2 SV=2
ADAMTS20	0.155336	0.184691	0.139879	0.217484	0.161368	0.225309	0.332438	0.276462	0.181844	0.303196	0.352183	0.357935	0.0334238	0.0293838	0.00860017	0.11059	0.127105	0.103804	PREDICTED: A disintegrin and metalloproteinase with thrombospondin motifs 20 [Pelodiscus sinensis]	-	-	K09609	ADAMTS20	http://www.genome.jp/dbget-bin/www_bget?ko:K09609	-	-	KOG3538(O)(Disintegrin metalloproteinases with thrombospondin repeats)	sp|P59511|ATS20_MOUSE;gnl|BL_ORD_ID|298163	sp|P59511|ATS20_MOUSE A disintegrin and metalloproteinase with thrombospondin motifs 20 OS=Mus musculus GN=Adamts20 PE=2 SV=2;sp|P59511|ATS20_MOUSE A disintegrin and metalloproteinase with thrombospondin motifs 20 OS=Mus musculus GN=Adamts20 PE=2 SV=2
ADAMTS4	0.623249	0.330414	0.517196	1.3483	1.28081	0.955688	1.14395	1.02036	0.904716	0.777427	1.01157	1.27485	0.307496	0.367356	0.350248	0.374748	0.294466	0.507856	PREDICTED: A disintegrin and metalloproteinase with thrombospondin motifs 4 [Pelodiscus sinensis]	GO:0031012;GO:0004222;GO:0008237;GO:0005615;GO:0006508;GO:0008270;GO:0002020;GO:0005578	extracellular matrix;metalloendopeptidase activity;metallopeptidase activity;extracellular space;proteolysis;zinc ion binding;protease binding;proteinaceous extracellular matrix	K07764	ADAMTS4	http://www.genome.jp/dbget-bin/www_bget?ko:K07764	-	-	KOG3538(O)(Disintegrin metalloproteinases with thrombospondin repeats)	sp|Q8BNJ2|ATS4_MOUSE;gnl|BL_ORD_ID|298166	sp|Q8BNJ2|ATS4_MOUSE A disintegrin and metalloproteinase with thrombospondin motifs 4 OS=Mus musculus GN=Adamts4 PE=2 SV=2;sp|Q8BNJ2|ATS4_MOUSE A disintegrin and metalloproteinase with thrombospondin motifs 4 OS=Mus musculus GN=Adamts4 PE=2 SV=2
ADAMTS5	0.278754	0.378398	0.1959	0.187521	0.283301	0.187521	0.582063	0.564666	0.471292	0.671173	0.519828	0.638489	0.10721	0.294466	0.1959	0.198657	0.220108	0.264818	PREDICTED: A disintegrin and metalloproteinase with thrombospondin motifs 5 [Pelodiscus sinensis]	GO:0031012;GO:0050840;GO:0008201;GO:0004222;GO:0008237;GO:0005615;GO:0006508;GO:0042742;GO:0008270;GO:0005578	extracellular matrix;extracellular matrix binding;heparin binding;metalloendopeptidase activity;metallopeptidase activity;extracellular space;proteolysis;defense response to bacterium;zinc ion binding;proteinaceous extracellular matrix	K08620	ADAMTS5	http://www.genome.jp/dbget-bin/www_bget?ko:K08620	-	-	KOG3538(O)(Disintegrin metalloproteinases with thrombospondin repeats)	gnl|BL_ORD_ID|301816;sp|Q9UNA0|ATS5_HUMAN	sp|Q9R001|ATS5_MOUSE A disintegrin and metalloproteinase with thrombospondin motifs 5 OS=Mus musculus GN=Adamts5 PE=2 SV=2;sp|Q9UNA0|ATS5_HUMAN A disintegrin and metalloproteinase with thrombospondin motifs 5 OS=Homo sapiens GN=ADAMTS5 PE=1 SV=2
ADAMTSL3	0.338456	0.31597	0.33646	0.594393	0.382017	0.52763	0.318063	0.340444	0.390935	0.418301	0.255273	0.515874	0.123852	0.164353	0.11059	0.285557	0.359835	0.190332	PREDICTED: ADAMTS-like protein 3 isoform X7 [Pelodiscus sinensis];PREDICTED: ADAMTS-like protein 3 isoform X3 [Pelodiscus sinensis]<>XP_014437124.1 PREDICTED: ADAMTS-like protein 3 isoform X3 [Pelodiscus sinensis];PREDICTED: ADAMTS-like protein 3 isoform X2 [Pelodiscus sinensis];PREDICTED: ADAMTS-like protein 3 isoform X9 [Pelodiscus sinensis];PREDICTED: ADAMTS-like protein 3 isoform X5 [Pelodisc…	GO:0008233;GO:0008237;GO:0008270;GO:0005578	peptidase activity;metallopeptidase activity;zinc ion binding;proteinaceous extracellular matrix	-	-	-	-	-	KOG4597(O)(Serine proteinase inhibitor (KU family) with thrombospondin repeats);KOG3538(O)(Disintegrin metalloproteinases with thrombospondin repeats)	sp|P82987|ATL3_HUMAN;gnl|BL_ORD_ID|286900	sp|P82987|ATL3_HUMAN ADAMTS-like protein 3 OS=Homo sapiens GN=ADAMTSL3 PE=1 SV=4;sp|P82987|ATL3_HUMAN ADAMTS-like protein 3 OS=Homo sapiens GN=ADAMTSL3 PE=1 SV=4
ADAMTSL4	0.827369	0.591065	0.790988	1.35583	1.5172	1.40449	0.91803	0.977266	0.934498	0.988559	0.993877	1.01157	0.655138	0.611723	0.696356	0.760422	0.85187	0.7348	PREDICTED: ADAMTS-like protein 4, partial [Pelodiscus sinensis]	-	-	-	-	-	-	-	KOG4597(O)(Serine proteinase inhibitor (KU family) with thrombospondin repeats)	sp|Q4FZU4|ATL4_RAT;sp|Q6UY14|ATL4_HUMAN;gnl|BL_ORD_ID|286902	sp|Q4FZU4|ATL4_RAT ADAMTS-like protein 4 OS=Rattus norvegicus GN=Adamtsl4 PE=2 SV=1;sp|Q6UY14|ATL4_HUMAN ADAMTS-like protein 4 OS=Homo sapiens GN=ADAMTSL4 PE=1 SV=2;sp|Q6UY14|ATL4_HUMAN ADAMTS-like protein 4 OS=Homo sapiens GN=ADAMTSL4 PE=1 SV=2
ADAP1	0.744293	0.768638	0.728354	0.658011	0.861534	0.839478	1.03981	0.912753	0.737987	0.988113	0.686636	0.909021	0.836324	1.15076	0.994317	0.732394	0.840106	0.869232	PREDICTED: arf-GAP with dual PH domain-containing protein 1 isoform X1 [Pelodiscus sinensis];PREDICTED: arf-GAP with dual PH domain-containing protein 1 isoform X2 [Pelodiscus sinensis]	-	-	-	-	-	-	-	KOG0703(T)(Predicted GTPase-activating protein)	sp|O75689|ADAP1_HUMAN;gnl|BL_ORD_ID|271186	sp|O75689|ADAP1_HUMAN Arf-GAP with dual PH domain-containing protein 1 OS=Homo sapiens GN=ADAP1 PE=1 SV=2;sp|O75689|ADAP1_HUMAN Arf-GAP with dual PH domain-containing protein 1 OS=Homo sapiens GN=ADAP1 PE=1 SV=2
ADCY2	0.32838	0.401401	0.130334	0.421604	0.31597	0.30103	0.457882	0.547775	0.532754	0.580925	0.380211	0.404834	0.514548	0.367356	0.550228	0.539076	0.477121	0.644439	PREDICTED: adenylate cyclase type 2 [Pelodiscus sinensis]<>XP_014428568.1 PREDICTED: adenylate cyclase type 2 [Pelodiscus sinensis];PREDICTED: adenylate cyclase type 2 [Ailuropoda melanoleuca]	GO:0005737;GO:0004016;GO:0007193;GO:0005886;GO:0016849;GO:0016829;GO:0016021;GO:0016020;GO:0019933;GO:0000166;GO:0007189;GO:0006171;GO:0009190;GO:0035556	cytoplasm;adenylate cyclase activity;adenylate cyclase-inhibiting G-protein coupled receptor signaling pathway;plasma membrane;phosphorus-oxygen lyase activity;lyase activity;integral component of membrane;membrane;cAMP-mediated signaling;nucleotide binding;adenylate cyclase-activating G-protein coupled receptor signaling pathway;cAMP biosynthetic process;cyclic nucleotide biosynthetic process;in…	K08042	ADCY2	http://www.genome.jp/dbget-bin/www_bget?ko:K08042	Oocyte meiosis;Gap junction;Apelin signaling pathway;Calcium signaling pathway;Phospholipase D signaling pathway;Rap1 signaling pathway;cAMP signaling pathway;cGMP - PKG signaling pathway;Purine metabolism;Longevity regulating pathway - mammal;Longevity regulating pathway - multiple species;Adrenergic signaling in cardiomyocytes;Vascular smooth muscle contraction;Bile secretion;Gastric acid secre…	ko04114,ko04540,ko04371,ko04020,ko04072,ko04015,ko04024,ko04022,ko00230,ko04211,ko04213,ko04261,ko04270,ko04976,ko04971,ko04972,ko04970,ko04925,ko04915,ko04922,ko04912,ko04911,ko04916,ko04913,ko04921,ko04914,ko04923,ko04918,ko04713,ko04062,ko04611,ko04725,ko04727,ko04724,ko04723,ko04750	KOG3619(C)(Adenylate/guanylate cyclase)	sp|Q08462|ADCY2_HUMAN;gnl|BL_ORD_ID|272370;sp|Q80TL1|ADCY2_MOUSE	sp|Q08462|ADCY2_HUMAN Adenylate cyclase type 2 OS=Homo sapiens GN=ADCY2 PE=1 SV=5;sp|Q08462|ADCY2_HUMAN Adenylate cyclase type 2 OS=Homo sapiens GN=ADCY2 PE=1 SV=5;sp|Q80TL1|ADCY2_MOUSE Adenylate cyclase type 2 OS=Mus musculus GN=Adcy2 PE=1 SV=2
ADCY8	0.0606978	0.0863598	0.0791812	0.281033	0.232996	0.155336	0.31597	0.445604	0.30963	0.243038	0.146128	0.190332	0.392697	0.471292	0.578639	0.517196	0.579784	0.361728	PREDICTED: adenylate cyclase type 8 [Pelodiscus sinensis];PREDICTED: adenylate cyclase type 8 [Chrysemys picta bellii];PREDICTED: adenylate cyclase type 8 [Chelonia mydas]	-	-	K08048	ADCY8	http://www.genome.jp/dbget-bin/www_bget?ko:K08048	Oocyte meiosis;Gap junction;Apelin signaling pathway;Calcium signaling pathway;Phospholipase D signaling pathway;Rap1 signaling pathway;cAMP signaling pathway;cGMP - PKG signaling pathway;Purine metabolism;Longevity regulating pathway - mammal;Longevity regulating pathway - multiple species;Adrenergic signaling in cardiomyocytes;Vascular smooth muscle contraction;Bile secretion;Gastric acid secre…	ko04114,ko04540,ko04371,ko04020,ko04072,ko04015,ko04024,ko04022,ko00230,ko04211,ko04213,ko04261,ko04270,ko04976,ko04971,ko04972,ko04970,ko04925,ko04915,ko04912,ko04911,ko04916,ko04913,ko04921,ko04914,ko04923,ko04918,ko04713,ko04062,ko04611,ko04725,ko04727,ko04724,ko04720,ko04723,ko04750,ko04742	KOG3619(C)(Adenylate/guanylate cyclase)	sp|P40145|ADCY8_HUMAN;gnl|BL_ORD_ID|268319	sp|P40145|ADCY8_HUMAN Adenylate cyclase type 8 OS=Homo sapiens GN=ADCY8 PE=1 SV=1;sp|P40145|ADCY8_HUMAN Adenylate cyclase type 8 OS=Homo sapiens GN=ADCY8 PE=1 SV=1
ADCY9	0.454845	0.389166	0.403121	0.447158	0.469822	0.356026	0.628389	0.539076	0.534026	0.644439	0.633468	0.63749	0.298853	0.40824	0.432969	0.419956	0.39794	0.421604	PREDICTED: adenylate cyclase type 9 isoform X2 [Pelodiscus sinensis];PREDICTED: adenylate cyclase type 9 isoform X1 [Pelodiscus sinensis]	GO:0004016;GO:0016849;GO:0071880;GO:0016829;GO:0016021;GO:0016020;GO:0005887;GO:0000166;GO:0007189;GO:0006171;GO:0009190;GO:0035556	adenylate cyclase activity;phosphorus-oxygen lyase activity;adenylate cyclase-activating adrenergic receptor signaling pathway;lyase activity;integral component of membrane;membrane;integral component of plasma membrane;nucleotide binding;adenylate cyclase-activating G-protein coupled receptor signaling pathway;cAMP biosynthetic process;cyclic nucleotide biosynthetic process;intracellular signal …	K08049	ADCY9	http://www.genome.jp/dbget-bin/www_bget?ko:K08049	Oocyte meiosis;Gap junction;Apelin signaling pathway;Calcium signaling pathway;Phospholipase D signaling pathway;Rap1 signaling pathway;cAMP signaling pathway;cGMP - PKG signaling pathway;Purine metabolism;Longevity regulating pathway - mammal;Longevity regulating pathway - multiple species;Adrenergic signaling in cardiomyocytes;Vascular smooth muscle contraction;Bile secretion;Gastric acid secre…	ko04114,ko04540,ko04371,ko04020,ko04072,ko04015,ko04024,ko04022,ko00230,ko04211,ko04213,ko04261,ko04270,ko04976,ko04971,ko04972,ko04970,ko04925,ko04915,ko04912,ko04911,ko04916,ko04913,ko04921,ko04914,ko04923,ko04918,ko04713,ko04961,ko04962,ko04062,ko04611,ko04725,ko04727,ko04724,ko04723,ko04750	KOG3619(C)(Adenylate/guanylate cyclase)	sp|Q9DGG6|ADCY9_CHICK;gnl|BL_ORD_ID|272375	sp|Q9DGG6|ADCY9_CHICK Adenylate cyclase type 9 OS=Gallus gallus GN=ADCY9 PE=1 SV=1;sp|Q9DGG6|ADCY9_CHICK Adenylate cyclase type 9 OS=Gallus gallus GN=ADCY9 PE=1 SV=1
ADGRB1	0.287802	0.338456	0.385606	0.414973	0.487138	0.429752	0.350248	0.33646	0.453318	0.399674	0.444045	0.283301	0.113943	0.09691	0.0827854	0.298853	0.313867	0.164353	PREDICTED: brain-specific angiogenesis inhibitor 1 isoform X3 [Pelodiscus sinensis];PREDICTED: brain-specific angiogenesis inhibitor 1 isoform X2 [Pelodiscus sinensis];PREDICTED: brain-specific angiogenesis inhibitor 1 isoform X1 [Pelodiscus sinensis]	-	-	K04596	BAI1	http://www.genome.jp/dbget-bin/www_bget?ko:K04596	p53 signaling pathway	ko04115	-	sp|O14514|BAI1_HUMAN;gnl|BL_ORD_ID|309091;sp|Q3UHD1|BAI1_MOUSE	sp|O14514|BAI1_HUMAN Brain-specific angiogenesis inhibitor 1 OS=Homo sapiens GN=BAI1 PE=1 SV=2;sp|Q3UHD1|BAI1_MOUSE Brain-specific angiogenesis inhibitor 1 OS=Mus musculus GN=Bai1 PE=1 SV=1;sp|Q3UHD1|BAI1_MOUSE Brain-specific angiogenesis inhibitor 1 OS=Mus musculus GN=Bai1 PE=1 SV=1
ADGRB2	0.439333	0.334454	0.344392	0.741152	0.708421	0.598791	0.320146	0.403121	0.330414	0.285557	0.40824	0.322219	0.158362	0.0413927	0.0569049	0.454845	0.190332	0.143015	PREDICTED: LOW QUALITY PROTEIN: adhesion G protein-coupled receptor B2, partial [Pelodiscus sinensis]	-	-	K04597	BAI2	http://www.genome.jp/dbget-bin/www_bget?ko:K04597	-	-	-	gnl|BL_ORD_ID|277634;sp|Q5R7Y0|AGRB2_PONAB	sp|Q5R7Y0|AGRB2_PONAB Adhesion G protein-coupled receptor B2 OS=Pongo abelii GN=ADGRB2 PE=2 SV=2;sp|Q5R7Y0|AGRB2_PONAB Adhesion G protein-coupled receptor B2 OS=Pongo abelii GN=ADGRB2 PE=2 SV=2
ADGRD2	0.680336	0.526339	0.491362	1.00518	0.941014	0.862728	0.679428	0.658965	0.628389	0.580925	0.604226	0.79379	0.499687	0.307496	0.11059	0.318063	0.378398	0.292256	PREDICTED: LOW QUALITY PROTEIN: adhesion G-protein coupled receptor D2 [Pelodiscus sinensis]	-	-	K08466	GPR144	http://www.genome.jp/dbget-bin/www_bget?ko:K08466	-	-	KOG4193(T)(G protein-coupled receptors)	gnl|BL_ORD_ID|277639;sp|Q7Z7M1|AGRD2_HUMAN	sp|Q7Z7M1|AGRD2_HUMAN Adhesion G-protein coupled receptor D2 OS=Homo sapiens GN=ADGRD2 PE=2 SV=1;sp|Q7Z7M1|AGRD2_HUMAN Adhesion G-protein coupled receptor D2 OS=Homo sapiens GN=ADGRD2 PE=2 SV=1
ADGRF5	0.136721	0.123852	0.123852	0.161368	0.190332	0.071882	0.206826	0.127105	0.260071	0.262451	0.274158	0.252853	0.495544	0.220108	0.222716	0.472756	0.252853	0.363612	PREDICTED: adhesion G protein-coupled receptor F5 [Pelodiscus sinensis]<>XP_006120745.1 PREDICTED: adhesion G protein-coupled receptor F5 [Pelodiscus sinensis]	-	-	K08458	GPR116	http://www.genome.jp/dbget-bin/www_bget?ko:K08458	-	-	-	sp|Q9WVT0|AGRF5_RAT;gnl|BL_ORD_ID|275900	sp|Q9WVT0|AGRF5_RAT Adhesion G protein-coupled receptor F5 OS=Rattus norvegicus GN=Adgrf5 PE=1 SV=1;sp|Q9WVT0|AGRF5_RAT Adhesion G protein-coupled receptor F5 OS=Rattus norvegicus GN=Adgrf5 PE=1 SV=1
ADGRG6	0.217484	0.396199	0.380211	0.285557	0.287802	0.247973	0.448706	0.439333	0.4843	0.625312	0.489958	0.618048	0.392697	0.472756	0.465383	0.432969	0.396199	0.44248	PREDICTED: G-protein coupled receptor 126 isoform X5 [Pelodiscus sinensis];PREDICTED: G-protein coupled receptor 126 isoform X4 [Pelodiscus sinensis];PREDICTED: G-protein coupled receptor 126 isoform X1 [Pelodiscus sinensis];PREDICTED: G-protein coupled receptor 126 isoform X2 [Pelodiscus sinensis]<>XP_014435657.1 PREDICTED: G-protein coupled receptor 126 isoform X2 [Pelodiscus sinensis]<>XP_0144…	-	-	K08463	GPR126	http://www.genome.jp/dbget-bin/www_bget?ko:K08463	-	-	KOG3714(O)(Meprin A metalloprotease)	gnl|BL_ORD_ID|273822;sp|Q86SQ4|AGRG6_HUMAN	sp|Q86SQ4|AGRG6_HUMAN Adhesion G-protein coupled receptor G6 OS=Homo sapiens GN=ADGRG6 PE=1 SV=3;sp|Q86SQ4|AGRG6_HUMAN Adhesion G-protein coupled receptor G6 OS=Homo sapiens GN=ADGRG6 PE=1 SV=3
ADGRG7	0.61595	0.555094	0.804821	0.365488	0.531479	0.454845	0.829304	0.725912	0.769377	0.966611	0.699838	0.592177	0.864511	1.00432	0.833784	0.869818	0.745075	0.868056	PREDICTED: adhesion G-protein coupled receptor G7 [Pelodiscus sinensis]	-	-	K08464	GPR128	http://www.genome.jp/dbget-bin/www_bget?ko:K08464	-	-	KOG4193(T)(G protein-coupled receptors)	gnl|BL_ORD_ID|272923;sp|Q8BM96|AGRG7_MOUSE;sp|Q96K78|AGRG7_HUMAN	sp|Q96K78|AGRG7_HUMAN Adhesion G-protein coupled receptor G7 OS=Homo sapiens GN=ADGRG7 PE=1 SV=2;sp|Q8BM96|AGRG7_MOUSE Adhesion G-protein coupled receptor G7 OS=Mus musculus GN=Adgrg7 PE=1 SV=2;sp|Q96K78|AGRG7_HUMAN Adhesion G-protein coupled receptor G7 OS=Homo sapiens GN=ADGRG7 PE=1 SV=2
ADGRL1	1.00775	0.848805	0.999565	1.26055	1.24204	1.22608	1.08743	0.968016	1.0461	1.04415	1.12352	1.06371	0.726727	0.720159	0.644439	0.841985	0.767898	0.818885	PREDICTED: LOW QUALITY PROTEIN: adhesion G protein-coupled receptor L1, partial [Pelodiscus sinensis]	GO:0016524;GO:0007166;GO:0051965;GO:0007157;GO:0090129;GO:0004888;GO:0016079;GO:0016021;GO:0045202;GO:0007186;GO:0030246;GO:0016020;GO:0004871;GO:0007165;GO:0004930	latrotoxin receptor activity;cell surface receptor signaling pathway;positive regulation of synapse assembly;heterophilic cell-cell adhesion via plasma membrane cell adhesion molecules;positive regulation of synapse maturation;transmembrane signaling receptor activity;synaptic vesicle exocytosis;integral component of membrane;synapse;G-protein coupled receptor signaling pathway;carbohydrate bindi…	K04592	LPHN1	http://www.genome.jp/dbget-bin/www_bget?ko:K04592	-	-	KOG4193(T)(G protein-coupled receptors)	sp|O97831|AGRL1_BOVIN;gnl|BL_ORD_ID|277648;sp|O88917|AGRL1_RAT;sp|Q80TR1|AGRL1_MOUSE	sp|O97831|AGRL1_BOVIN Adhesion G protein-coupled receptor L1 OS=Bos taurus GN=ADGRL1 PE=2 SV=1;sp|Q80TR1|AGRL1_MOUSE Adhesion G protein-coupled receptor L1 OS=Mus musculus GN=Adgrl1 PE=1 SV=2;sp|O88917|AGRL1_RAT Adhesion G protein-coupled receptor L1 OS=Rattus norvegicus GN=Adgrl1 PE=1 SV=1;sp|Q80TR1|AGRL1_MOUSE Adhesion G protein-coupled receptor L1 OS=Mus musculus GN=Adgrl1 PE=1 SV=2
ADGRL4	0.833784	0.611723	0.561101	0.763428	0.789581	0.535294	0.928908	0.993436	0.863917	1.02776	0.894316	1.06258	0.414973	0.372912	0.600973	0.489958	0.338456	0.40824	PREDICTED: adhesion G protein-coupled receptor L4 isoform X1 [Pelodiscus sinensis];PREDICTED: adhesion G protein-coupled receptor L4 isoform X2 [Pelodiscus sinensis];PREDICTED: adhesion G protein-coupled receptor L4 isoform X3 [Pelodiscus sinensis]	-	-	K04595	ELTD1	http://www.genome.jp/dbget-bin/www_bget?ko:K04595	-	-	-	gnl|BL_ORD_ID|277651;sp|Q9ESC1|AGRL4_RAT;gnl|BL_ORD_ID|272926;sp|Q9HBW9|AGRL4_HUMAN	sp|Q9HBW9|AGRL4_HUMAN Adhesion G protein-coupled receptor L4 OS=Homo sapiens GN=ADGRL4 PE=1 SV=3;sp|Q9ESC1|AGRL4_RAT Adhesion G protein-coupled receptor L4 OS=Rattus norvegicus GN=Adgrl4 PE=1 SV=1;sp|Q9ESC1|AGRL4_RAT Adhesion G protein-coupled receptor L4 OS=Rattus norvegicus GN=Adgrl4 PE=1 SV=1;sp|Q9HBW9|AGRL4_HUMAN Adhesion G protein-coupled receptor L4 OS=Homo sapiens GN=ADGRL4 PE=1 SV=3
ADIG	0.64836	0.448706	0.463893	0.421604	0.812913	0.539076	0.982271	0.541579	0.900913	0.704151	0.700704	0.61066	0.881955	1.42439	1.16256	0.934498	1.0835	1.18554	PREDICTED: adipogenin [Pelodiscus sinensis]	-	-	-	-	-	-	-	-	-	-
ADNP2	0.860338	0.786041	0.820858	0.92737	0.782473	0.918555	0.647383	0.770115	0.802774	0.813581	0.671173	0.884795	0.465383	0.553883	0.474216	0.41162	0.465383	0.522444	PREDICTED: ADNP homeobox protein 2 isoform X1 [Pelodiscus sinensis]	GO:0030307;GO:0060548;GO:0030182;GO:0071300;GO:0034599;GO:0046872	positive regulation of cell growth;negative regulation of cell death;neuron differentiation;cellular response to retinoic acid;cellular response to oxidative stress;metal ion binding	-	-	-	-	-	-	gnl|BL_ORD_ID|271837;sp|Q6IQ32|ADNP2_HUMAN;sp|Q8CHC8|ADNP2_MOUSE	sp|Q8CHC8|ADNP2_MOUSE ADNP homeobox protein 2 OS=Mus musculus GN=Adnp2 PE=2 SV=2;sp|Q6IQ32|ADNP2_HUMAN ADNP homeobox protein 2 OS=Homo sapiens GN=ADNP2 PE=1 SV=1;sp|Q8CHC8|ADNP2_MOUSE ADNP homeobox protein 2 OS=Mus musculus GN=Adnp2 PE=2 SV=2
ADORA1	0.559907	0.454845	0.68842	0.977724	1.07151	1.01745	0.824776	0.800029	0.892651	0.4843	0.961421	1.06633	0.161368	0.152288	0.178977	0.544068	0.462398	0.526339	PREDICTED: adenosine receptor A1 [Pelodiscus sinensis]	GO:0005886;GO:0001609;GO:0050728;GO:0051930;GO:0016021;GO:0045202;GO:0007186;GO:0016020;GO:0043197;GO:1900453;GO:0004871;GO:0007165;GO:0003093;GO:0060079;GO:0002686;GO:0001973;GO:0004930;GO:0070256	plasma membrane;G-protein coupled adenosine receptor activity;negative regulation of inflammatory response;regulation of sensory perception of pain;integral component of membrane;synapse;G-protein coupled receptor signaling pathway;membrane;dendritic spine;negative regulation of long term synaptic depression;signal transducer activity;signal transduction;regulation of glomerular filtration;excita…	K04265	ADORA1	http://www.genome.jp/dbget-bin/www_bget?ko:K04265	Sphingolipid signaling pathway;cAMP signaling pathway;cGMP - PKG signaling pathway;Neuroactive ligand-receptor interaction;Regulation of lipolysis in adipocyte;Renin secretion	ko04071,ko04024,ko04022,ko04080,ko04923,ko04924	KOG3656(R)(FOG: 7 transmembrane receptor)	sp|P49892|AA1R_CHICK;gnl|BL_ORD_ID|266541	sp|P49892|AA1R_CHICK Adenosine receptor A1 OS=Gallus gallus GN=ADORA1 PE=2 SV=1;sp|P49892|AA1R_CHICK Adenosine receptor A1 OS=Gallus gallus GN=ADORA1 PE=2 SV=1
ADORA2A	0.804821	0.656098	0.568202	0.774517	0.701568	0.752048	1.17667	0.983626	0.850646	0.885361	0.771587	1.02284	0.40824	0.456366	0.439333	0.232996	0.255273	0.287802	PREDICTED: adenosine receptor A2a [Pelodiscus sinensis]	GO:0005886;GO:0001609;GO:0016021;GO:0007186;GO:0016020;GO:0004871;GO:0007165;GO:0001973;GO:0004930	plasma membrane;G-protein coupled adenosine receptor activity;integral component of membrane;G-protein coupled receptor signaling pathway;membrane;signal transducer activity;signal transduction;adenosine receptor signaling pathway;G-protein coupled receptor activity	K04266	ADORA2A,ADOR	http://www.genome.jp/dbget-bin/www_bget?ko:K04266	Calcium signaling pathway;Rap1 signaling pathway;cAMP signaling pathway;Neuroactive ligand-receptor interaction;Vascular smooth muscle contraction	ko04020,ko04015,ko04024,ko04080,ko04270	KOG3656(R)(FOG: 7 transmembrane receptor)	sp|P11617|AA2AR_CANLF;gnl|BL_ORD_ID|264442	sp|P11617|AA2AR_CANLF Adenosine receptor A2a OS=Canis lupus familiaris GN=ADORA2A PE=2 SV=1;sp|P11617|AA2AR_CANLF Adenosine receptor A2a OS=Canis lupus familiaris GN=ADORA2A PE=2 SV=1
ADRA2A	0.677607	0.624282	0.592177	0.836957	0.692847	0.732394	1.17955	1.09934	0.958086	1.0799	1.30363	0.951338	1.05115	1.03141	1.29973	1.21854	1.04571	1.06967	PREDICTED: alpha-2A adrenergic receptor [Pelodiscus sinensis]	GO:0030335;GO:0005737;GO:0042593;GO:0071881;GO:0090303;GO:0019229;GO:0004938;GO:0004935;GO:0030168;GO:0005886;GO:0035625;GO:0001819;GO:0019901;GO:0031696;GO:0032147;GO:0016021;GO:0071882;GO:0051380;GO:0016020;GO:0005887;GO:0004871;GO:0031996;GO:0043235;GO:0042803;GO:0051379;GO:0032795	positive regulation of cell migration;cytoplasm;glucose homeostasis;adenylate cyclase-inhibiting adrenergic receptor signaling pathway;positive regulation of wound healing;regulation of vasoconstriction;alpha2-adrenergic receptor activity;adrenergic receptor activity;platelet activation;plasma membrane;epidermal growth factor-activated receptor transactivation by G-protein coupled receptor signal…	K04138	ADRA2A	http://www.genome.jp/dbget-bin/www_bget?ko:K04138	cGMP - PKG signaling pathway;Neuroactive ligand-receptor interaction	ko04022,ko04080	KOG3656(R)(FOG: 7 transmembrane receptor)	gnl|BL_ORD_ID|269776;sp|P18871|ADA2A_PIG	sp|P18871|ADA2A_PIG Alpha-2A adrenergic receptor OS=Sus scrofa GN=ADRA2A PE=1 SV=1;sp|P18871|ADA2A_PIG Alpha-2A adrenergic receptor OS=Sus scrofa GN=ADRA2A PE=1 SV=1
ADRA2C	0.240549	0.133539	0.227887	0.575188	0.489958	0.269513	0.255273	0.372912	0.264818	0.240549	0.33646	0.214844	0.0128372	0.0293838	0.0170333	0.0128372	0.0530784	0.127105	PREDICTED: alpha-2C adrenergic receptor [Pelodiscus sinensis]	GO:0005737;GO:0019229;GO:0004938;GO:0004935;GO:0030168;GO:0005886;GO:0007267;GO:0035625;GO:0071880;GO:0046982;GO:0016021;GO:0007186;GO:0016020;GO:0045666;GO:0005887;GO:0004871;GO:0007165;GO:0071883;GO:0042803;GO:0051379;GO:0031694;GO:0032148;GO:0004930	cytoplasm;regulation of vasoconstriction;alpha2-adrenergic receptor activity;adrenergic receptor activity;platelet activation;plasma membrane;cell-cell signaling;epidermal growth factor-activated receptor transactivation by G-protein coupled receptor signaling pathway;adenylate cyclase-activating adrenergic receptor signaling pathway;protein heterodimerization activity;integral component of membr…	K04140	ADRA2C	http://www.genome.jp/dbget-bin/www_bget?ko:K04140	cGMP - PKG signaling pathway;Neuroactive ligand-receptor interaction	ko04022,ko04080	KOG3656(R)(FOG: 7 transmembrane receptor)	gnl|BL_ORD_ID|272778	sp|P35405|ADA2C_DIDVI Alpha-2C adrenergic receptor OS=Didelphis virginiana GN=ADRA2C PE=2 SV=2
ADRB1	0.465383	0.478566	0.522444	0.459392	0.536558	0.58995	0.38739	0.451786	0.55145	0.606381	0.534026	0.737987	0.09691	0.117271	0.064458	0.0569049	0.139879	0.11059	PREDICTED: beta-1 adrenergic receptor [Pelodiscus sinensis]	-	-	K04141	ADRB1	http://www.genome.jp/dbget-bin/www_bget?ko:K04141	Gap junction;Endocytosis;Calcium signaling pathway;cAMP signaling pathway;cGMP - PKG signaling pathway;Neuroactive ligand-receptor interaction;Adrenergic signaling in cardiomyocytes;Salivary secretion;Regulation of lipolysis in adipocyte;Renin secretion	ko04540,ko04144,ko04020,ko04024,ko04022,ko04080,ko04261,ko04970,ko04923,ko04924	KOG3656(R)(FOG: 7 transmembrane receptor)	gnl|BL_ORD_ID|273743	sp|P07700|ADRB1_MELGA Beta-1 adrenergic receptor OS=Meleagris gallopavo GN=ADRB1 PE=1 SV=1
AFAP1	0.485721	0.477121	0.499687	0.597695	0.591065	0.511883	0.70927	0.698101	0.569374	0.627366	0.628389	0.867467	0.294466	0.245513	0.20412	0.264818	0.276462	0.269513	PREDICTED: actin filament-associated protein 1 isoform X5 [Pelodiscus sinensis];PREDICTED: actin filament-associated protein 1 isoform X4 [Pelodiscus sinensis];PREDICTED: actin filament-associated protein 1 isoform X2 [Pelodiscus sinensis];PREDICTED: actin filament-associated protein 1 isoform X1 [Pelodiscus sinensis];PREDICTED: actin filament-associated protein 1 isoform X3 [Pelodiscus sinensis]	GO:0051493;GO:0009966;GO:0005925	regulation of cytoskeleton organization;regulation of signal transduction;focal adhesion	K18616	AFAP1	http://www.genome.jp/dbget-bin/www_bget?ko:K18616	-	-	-	sp|Q90738|AFAP1_CHICK;gnl|BL_ORD_ID|272502	sp|Q90738|AFAP1_CHICK Actin filament-associated protein 1 OS=Gallus gallus GN=AFAP1 PE=1 SV=2;sp|Q90738|AFAP1_CHICK Actin filament-associated protein 1 OS=Gallus gallus GN=AFAP1 PE=1 SV=2
AFAP1L2	0.563481	0.501059	0.489958	0.598791	0.580925	0.489958	0.620136	0.534026	0.62634	0.686636	0.728354	0.779596	0.225309	0.214844	0.245513	0.440909	0.313867	0.4133	PREDICTED: actin filament-associated protein 1-like 2 isoform X1 [Pelodiscus sinensis];PREDICTED: actin filament-associated protein 1-like 2 isoform X3 [Pelodiscus sinensis];PREDICTED: actin filament-associated protein 1-like 2 isoform X2 [Pelodiscus sinensis]	-	-	-	-	-	-	-	-	sp|Q8N4X5|AF1L2_HUMAN;gnl|BL_ORD_ID|272496	sp|Q8N4X5|AF1L2_HUMAN Actin filament-associated protein 1-like 2 OS=Homo sapiens GN=AFAP1L2 PE=1 SV=1;sp|Q8N4X5|AF1L2_HUMAN Actin filament-associated protein 1-like 2 OS=Homo sapiens GN=AFAP1L2 PE=1 SV=1
AGA	0.999131	0.969416	0.903633	0.731589	0.839478	0.862728	1.07664	1.10992	1.01703	1.17464	0.980003	0.95376	1.01745	1.12287	1.14145	0.92737	1.1038	1.07115	PREDICTED: N(4)-(beta-N-acetylglucosaminyl)-L-asparaginase [Pelodiscus sinensis]	-	-	K01444	AGA,aspG	http://www.genome.jp/dbget-bin/www_bget?ko:K01444	Lysosome;Other glycan degradation	ko04142,ko00511	KOG1592(E)(Asparaginase)	sp|Q4R6C4|ASPG_MACFA;gnl|BL_ORD_ID|298436;sp|P30919|ASPG_RAT;sp|Q64191|ASPG_MOUSE	sp|Q4R6C4|ASPG_MACFA N(4)-(beta-N-acetylglucosaminyl)-L-asparaginase OS=Macaca fascicularis GN=AGA PE=2 SV=1;sp|Q4R6C4|ASPG_MACFA N(4)-(beta-N-acetylglucosaminyl)-L-asparaginase OS=Macaca fascicularis GN=AGA PE=2 SV=1;sp|P30919|ASPG_RAT N(4)-(Beta-N-acetylglucosaminyl)-L-asparaginase OS=Rattus norvegicus GN=Aga PE=1 SV=2;sp|Q64191|ASPG_MOUSE N(4)-(beta-N-acetylglucosaminyl)-L-asparaginase OS=Mus …
AGBL2	0.96895	0.723456	0.859739	1.04179	1.07335	1.20003	0.930949	0.683947	0.597695	0.686636	0.578639	0.625312	0.579784	0.439333	0.421604	0.683047	0.660865	0.510545	PREDICTED: cytosolic carboxypeptidase 2 [Pelodiscus sinensis]	-	-	-	-	-	-	-	KOG3641(E)(Zinc carboxypeptidase)	gnl|BL_ORD_ID|320961;sp|Q8CDK2|CBPC2_MOUSE;sp|Q4R632|CBPC2_MACFA;sp|Q5U5Z8|CBPC2_HUMAN	sp|Q8CDK2|CBPC2_MOUSE Cytosolic carboxypeptidase 2 OS=Mus musculus GN=Agbl2 PE=1 SV=1;sp|Q8CDK2|CBPC2_MOUSE Cytosolic carboxypeptidase 2 OS=Mus musculus GN=Agbl2 PE=1 SV=1;sp|Q4R632|CBPC2_MACFA Cytosolic carboxypeptidase 2 OS=Macaca fascicularis GN=AGBL2 PE=2 SV=1;sp|Q5U5Z8|CBPC2_HUMAN Cytosolic carboxypeptidase 2 OS=Homo sapiens GN=AGBL2 PE=1 SV=2
AGTR1	0.356026	0.136721	0.209515	0.509203	0.515874	0.285557	0.862728	0.650308	0.63749	0.634477	0.717671	0.839478	0.61066	0.30963	0.378398	0.775246	0.5302	0.614897	PREDICTED: type-1 angiotensin II receptor [Pelodiscus sinensis]	GO:0032270;GO:0005622;GO:0019229;GO:0001596;GO:0005886;GO:0032430;GO:0010873;GO:0051482;GO:0060326;GO:0019722;GO:0031711;GO:0001822;GO:0046982;GO:0005829;GO:0004945;GO:0016021;GO:0007186;GO:0016020;GO:0004871;GO:0007165;GO:0004930	positive regulation of cellular protein metabolic process;intracellular;regulation of vasoconstriction;angiotensin type I receptor activity;plasma membrane;positive regulation of phospholipase A2 activity;positive regulation of cholesterol esterification;positive regulation of cytosolic calcium ion concentration involved in phospholipase C-activating G-protein coupled signaling pathway;cell chemo…	K04166	AGTR1	http://www.genome.jp/dbget-bin/www_bget?ko:K04166	Apelin signaling pathway;Calcium signaling pathway;Phospholipase D signaling pathway;cGMP - PKG signaling pathway;Neuroactive ligand-receptor interaction;Adrenergic signaling in cardiomyocytes;Vascular smooth muscle contraction;Aldosterone synthesis and secretion;Renin secretion;Renin-angiotensin system	ko04371,ko04020,ko04072,ko04022,ko04080,ko04261,ko04270,ko04925,ko04924,ko04614	-	gnl|BL_ORD_ID|270512;sp|P33396|AGTR1_MELGA	sp|P33396|AGTR1_MELGA Type-1 angiotensin II receptor OS=Meleagris gallopavo GN=AGTR1 PE=2 SV=1;sp|P33396|AGTR1_MELGA Type-1 angiotensin II receptor OS=Meleagris gallopavo GN=AGTR1 PE=2 SV=1
AGTR2	0.382017	0.278754	0.352183	0.552668	0.546543	0.298853	0.49276	0.577492	0.552668	0.494155	0.501059	0.519828	0.624282	0.683047	0.71433	0.653213	0.827369	0.946943	PREDICTED: type-2 angiotensin II receptor [Pelodiscus sinensis]	GO:0042312;GO:0045909;GO:0001991;GO:0035566;GO:0004945;GO:0016021;GO:0007186;GO:0016020;GO:0004871;GO:0007165;GO:0007199;GO:0051387;GO:0006954;GO:0051000;GO:0035556;GO:0004930;GO:0042981	regulation of blood vessel diameter;positive regulation of blood vessel diameter;regulation of systemic arterial blood pressure by circulatory renin-angiotensin;regulation of metanephros size;angiotensin type II receptor activity;integral component of membrane;G-protein coupled receptor signaling pathway;membrane;signal transducer activity;signal transduction;G-protein coupled receptor signaling …	K04167	AGTR2	http://www.genome.jp/dbget-bin/www_bget?ko:K04167	Neuroactive ligand-receptor interaction;Adrenergic signaling in cardiomyocytes;Renin-angiotensin system	ko04080,ko04261,ko04614	-	gnl|BL_ORD_ID|274317;sp|Q9Z0Z6|AGTR2_MERUN	sp|Q9Z0Z6|AGTR2_MERUN Type-2 angiotensin II receptor OS=Meriones unguiculatus GN=AGTR2 PE=2 SV=1;sp|Q9Z0Z6|AGTR2_MERUN Type-2 angiotensin II receptor OS=Meriones unguiculatus GN=AGTR2 PE=2 SV=1
AHNAK	0.620136	0.69897	0.879669	0.671173	0.779596	0.756636	0.894316	0.835056	0.805501	0.977724	0.905256	1.06446	0.832509	0.803457	0.778874	1.00689	0.838849	0.837588	PREDICTED: neuroblast differentiation-associated protein AHNAK isoform X4 [Pelodiscus sinensis];PREDICTED: neuroblast differentiation-associated protein AHNAK isoform X1 [Pelodiscus sinensis]<>XP_014424231.1 PREDICTED: neuroblast differentiation-associated protein AHNAK isoform X1 [Pelodiscus sinensis];PREDICTED: neuroblast differentiation-associated protein AHNAK isoform X2 [Pelodiscus sinensis]…	-	-	-	-	-	-	-	-	sp|Q09666|AHNK_HUMAN;gnl|BL_ORD_ID|272527	sp|Q09666|AHNK_HUMAN Neuroblast differentiation-associated protein AHNAK OS=Homo sapiens GN=AHNAK PE=1 SV=2;sp|Q09666|AHNK_HUMAN Neuroblast differentiation-associated protein AHNAK OS=Homo sapiens GN=AHNAK PE=1 SV=2
AIF1L	1.30856	1.16465	1.12743	1.29336	1.29159	1.26198	1.3831	1.21325	1.29226	1.25164	1.09132	1.24601	0.928396	0.844477	0.576341	0.816241	0.866878	0.929419	PREDICTED: allograft inflammatory factor 1-like isoform X1 [Chrysemys picta bellii];PREDICTED: allograft inflammatory factor 1-like [Pelodiscus sinensis];Laminin subunit gamma-3 [Chelonia mydas];PREDICTED: allograft inflammatory factor 1-like isoform X2 [Chrysemys picta bellii]	-	-	K18617	AIF1	http://www.genome.jp/dbget-bin/www_bget?ko:K18617	-	-	KOG0041(R)(Predicted Ca2+-binding protein, EF-Hand protein superfamily)	gnl|BL_ORD_ID|273860;sp|Q9EQX4|AIF1L_MOUSE	sp|Q9EQX4|AIF1L_MOUSE Allograft inflammatory factor 1-like OS=Mus musculus GN=Aif1l PE=1 SV=1;sp|Q9EQX4|AIF1L_MOUSE Allograft inflammatory factor 1-like OS=Mus musculus GN=Aif1l PE=1 SV=1
AJAP1	0.434569	0.450249	0.372912	0.264818	0.240549	0.416641	0.532754	0.488551	0.563481	0.70757	0.621176	0.561101	0.624282	0.523746	0.220108	0.55145	0.330414	0.338456	PREDICTED: adherens junction-associated protein 1 [Pelodiscus sinensis]	GO:0016021;GO:0016020	integral component of membrane;membrane	-	-	-	-	-	-	sp|Q9UKB5|AJAP1_HUMAN;gnl|BL_ORD_ID|275961	sp|Q9UKB5|AJAP1_HUMAN Adherens junction-associated protein 1 OS=Homo sapiens GN=AJAP1 PE=1 SV=1;sp|Q9UKB5|AJAP1_HUMAN Adherens junction-associated protein 1 OS=Homo sapiens GN=AJAP1 PE=1 SV=1
AK4	0.354108	0.357935	0.416641	0.103804	0.278754	0.296665	0.926857	0.778874	0.587711	0.752816	0.83187	0.813581	0.307496	0.826075	0.365488	0.361728	0.49276	0.561101	PREDICTED: adenylate kinase 4, mitochondrial [Pelodiscus sinensis]	GO:0004190;GO:0015074;GO:0003676;GO:0003700;GO:0006508;GO:0006355;GO:0008270;GO:0046872	aspartic-type endopeptidase activity;DNA integration;nucleic acid binding;transcription factor activity, sequence-specific DNA binding;proteolysis;regulation of transcription, DNA-templated;zinc ion binding;metal ion binding	K00939	adk,AK	http://www.genome.jp/dbget-bin/www_bget?ko:K00939	Thiamine metabolism;Purine metabolism	ko00730,ko00230	KOG0017(R)(FOG: Transposon-encoded proteins with TYA, reverse transcriptase, integrase domains in various combinations);KOG3078(F)(Adenylate kinase)	sp|Q8I7P9|POL5_DROME;sp|Q0VCP1|KAD4_BOVIN;gnl|BL_ORD_ID|63562	sp|Q8I7P9|POL5_DROME Retrovirus-related Pol polyprotein from transposon opus OS=Drosophila melanogaster GN=pol PE=3 SV=1;sp|Q0VCP1|KAD4_BOVIN Adenylate kinase 4, mitochondrial OS=Bos taurus GN=AK4 PE=2 SV=1;sp|Q0VCP1|KAD4_BOVIN Adenylate kinase 4, mitochondrial OS=Bos taurus GN=AK4 PE=2 SV=1
AKAP12	0.850646	0.639486	0.62634	0.96426	1.0693	0.812913	1.11793	1.03782	1.02979	1.09272	1.15076	1.36717	0.860338	0.765669	0.664642	0.658011	0.630428	0.670246	PREDICTED: A-kinase anchor protein 12 isoform X2 [Pelodiscus sinensis];PREDICTED: A-kinase anchor protein 12 isoform X1 [Pelodiscus sinensis]<>XP_014424994.1 PREDICTED: A-kinase anchor protein 12 isoform X1 [Pelodiscus sinensis]	-	-	K16528	AKAP12	http://www.genome.jp/dbget-bin/www_bget?ko:K16528	-	-	-	sp|Q02952|AKA12_HUMAN;gnl|BL_ORD_ID|275415	sp|Q02952|AKA12_HUMAN A-kinase anchor protein 12 OS=Homo sapiens GN=AKAP12 PE=1 SV=4;sp|Q02952|AKA12_HUMAN A-kinase anchor protein 12 OS=Homo sapiens GN=AKAP12 PE=1 SV=4
AKIP1	1.07882	0.900367	0.937518	0.729165	0.799341	0.786751	1.08171	1.00817	1.01326	1.01953	0.857935	0.988559	1.05077	1.03222	0.950851	1.19285	1.03902	1.09272	PREDICTED: A-kinase-interacting protein 1 [Pelodiscus sinensis]	GO:0005654;GO:0034446;GO:1901222	nucleoplasm;substrate adhesion-dependent cell spreading;regulation of NIK/NF-kappaB signaling	-	-	-	-	-	-	gnl|BL_ORD_ID|272029	sp|Q9NQ31|AKIP1_HUMAN A-kinase-interacting protein 1 OS=Homo sapiens GN=AKIP1 PE=1 SV=2
ALKBH2	0.553883	0.640481	0.418301	0.352183	0.283301	0.267172	0.600973	0.622214	0.453318	0.418301	0.392697	0.482874	0.511883	0.579784	0.453318	0.260071	0.30103	0.376577	PREDICTED: alpha-ketoglutarate-dependent dioxygenase alkB homolog 2 [Pelodiscus sinensis]	GO:0043734;GO:0005654;GO:0051747;GO:0051213;GO:0008198;GO:0016706;GO:0035511;GO:0055114;GO:0006307;GO:0016491;GO:0015630;GO:0005634;GO:0006281	DNA-N1-methyladenine dioxygenase activity;nucleoplasm;cytosine C-5 DNA demethylase activity;dioxygenase activity;ferrous iron binding;oxidoreductase activity, acting on paired donors, with incorporation or reduction of molecular oxygen, 2-oxoglutarate as one donor, and incorporation of one atom each of oxygen into both donors;oxidative DNA demethylation;oxidation-reduction process;DNA dealkylatio…	K10859	ALKBH2	http://www.genome.jp/dbget-bin/www_bget?ko:K10859	-	-	-	sp|Q6NS38|ALKB2_HUMAN;gnl|BL_ORD_ID|271040	sp|Q6NS38|ALKB2_HUMAN DNA oxidative demethylase ALKBH2 OS=Homo sapiens GN=ALKBH2 PE=1 SV=1;sp|Q58DM4|ALKB2_BOVIN DNA oxidative demethylase ALKBH2 OS=Bos taurus GN=ALKBH2 PE=2 SV=1
ALPK3	0.39794	0.255273	0.296665	0.585461	0.727541	0.704151	0.699838	0.647383	0.523746	0.595496	0.60206	0.665581	0.428135	0.285557	0.311754	0.445604	0.374748	0.5302	PREDICTED: alpha-protein kinase 3 [Pelodiscus sinensis]	-	-	K08868	ALPK	http://www.genome.jp/dbget-bin/www_bget?ko:K08868	-	-	-	gnl|BL_ORD_ID|277995;sp|Q96L96|ALPK3_HUMAN	sp|Q96L96|ALPK3_HUMAN Alpha-protein kinase 3 OS=Homo sapiens GN=ALPK3 PE=2 SV=2;sp|Q96L96|ALPK3_HUMAN Alpha-protein kinase 3 OS=Homo sapiens GN=ALPK3 PE=2 SV=2
ALX1	0.783904	0.665581	0.788168	1.1685	1.13704	0.815578	1.04766	0.866878	0.907949	0.987219	0.969416	1.07482	0.428135	0.173186	0.260071	0.419956	0.593286	0.434569	PREDICTED: ALX homeobox protein 1 [Pelodiscus sinensis]	GO:0005654;GO:0001755;GO:0045944;GO:0000977;GO:0003677;GO:0045893;GO:0043565;GO:0014031;GO:0003700;GO:0048704;GO:0009952;GO:0001228;GO:0006355;GO:0046982;GO:0005667;GO:0060021;GO:0005634;GO:0010718;GO:0030326;GO:0005794	nucleoplasm;neural crest cell migration;positive regulation of transcription from RNA polymerase II promoter;RNA polymerase II regulatory region sequence-specific DNA binding;DNA binding;positive regulation of transcription, DNA-templated;sequence-specific DNA binding;mesenchymal cell development;transcription factor activity, sequence-specific DNA binding;embryonic skeletal system morphogenesis;…	K09334	CART1	http://www.genome.jp/dbget-bin/www_bget?ko:K09334	-	-	KOG0484(K)(Transcription factor PHOX2/ARIX, contains HOX domain)	sp|Q15699|ALX1_HUMAN;gnl|BL_ORD_ID|271586	sp|Q15699|ALX1_HUMAN ALX homeobox protein 1 OS=Homo sapiens GN=ALX1 PE=1 SV=2;sp|P0DMV5|ALX1_GEOFO ALX homeobox protein 1 OS=Geospiza fortis GN=ALX1 PE=3 SV=1
AMER1	0.230449	0.167317	0.143015	0.0791812	0.201397	0.139879	0.694605	0.511883	0.466868	0.761928	0.498311	0.729974	0.155336	0.303196	0.240549	0.240549	0.170262	0.232996	PREDICTED: APC membrane recruitment protein 1 [Pelodiscus sinensis]	-	-	K19407	AMER1	http://www.genome.jp/dbget-bin/www_bget?ko:K19407	-	-	-	gnl|BL_ORD_ID|273415	sp|Q5JTC6|AMER1_HUMAN APC membrane recruitment protein 1 OS=Homo sapiens GN=AMER1 PE=1 SV=2
AMIGO2	0.178977	0.164353	0.170262	0.369216	0.290035	0.193125	0.322219	0.378398	0.269513	0.424882	0.292256	0.44248	0.0293838	0.0211893	0.0334238	0.0334238	0.049218	0.0569049	PREDICTED: amphoterin-induced protein 2 [Pelodiscus sinensis]	GO:0051965;GO:0016021;GO:0016020;GO:0043066	positive regulation of synapse assembly;integral component of membrane;membrane;negative regulation of apoptotic process	-	-	-	-	-	KOG0619(R)(FOG: Leucine rich repeat)	gnl|BL_ORD_ID|274050	sp|Q86SJ2|AMGO2_HUMAN Amphoterin-induced protein 2 OS=Homo sapiens GN=AMIGO2 PE=1 SV=1
AMPH	0.716003	0.587711	0.600973	0.659916	0.541579	0.747412	0.599883	0.649335	0.61595	0.550228	0.582063	0.717671	0.209515	0.294466	0.240549	0.32838	0.330414	0.350248	PREDICTED: amphiphysin isoform X2 [Pelodiscus sinensis];PREDICTED: amphiphysin isoform X1 [Pelodiscus sinensis]	-	-	K12562	AMPH	http://www.genome.jp/dbget-bin/www_bget?ko:K12562	Endocytosis;Fc gamma R-mediated phagocytosis	ko04144,ko04666	KOG3771(U)(Amphiphysin)	sp|P50478|AMPH_CHICK;gnl|BL_ORD_ID|284466	sp|P50478|AMPH_CHICK Amphiphysin OS=Gallus gallus GN=AMPH PE=2 SV=1;sp|P50478|AMPH_CHICK Amphiphysin OS=Gallus gallus GN=AMPH PE=2 SV=1
ANGPT1	0.599883	0.453318	0.618048	0.868056	0.702431	0.694605	0.68842	0.720986	0.660865	0.803457	0.689309	0.904174	0.143015	0.222716	0.354108	0.404834	0.285557	0.448706	PREDICTED: angiopoietin-1 isoform X1 [Pelodiscus sinensis];Keratinocyte-associated transmembrane protein 2 [Chelonia mydas];PREDICTED: angiopoietin-1 isoform X2 [Pelodiscus sinensis];PREDICTED: angiopoietin-1 isoform X3 [Pelodiscus sinensis]	-	-	K05465	ANGPT1	http://www.genome.jp/dbget-bin/www_bget?ko:K05465	HIF-1 signaling pathway;PI3K-Akt signaling pathway;Rap1 signaling pathway;Ras signaling pathway	ko04066,ko04151,ko04015,ko04014	-	gnl|BL_ORD_ID|275620;gnl|BL_ORD_ID|276270;sp|Q9BDY8|ANGP1_PIG;sp|Q15389|ANGP1_HUMAN	sp|Q15389|ANGP1_HUMAN Angiopoietin-1 OS=Homo sapiens GN=ANGPT1 PE=1 SV=2;sp|Q9BDY8|ANGP1_PIG Angiopoietin-1 OS=Sus scrofa GN=ANGPT1 PE=2 SV=1;sp|Q9BDY8|ANGP1_PIG Angiopoietin-1 OS=Sus scrofa GN=ANGPT1 PE=2 SV=1;sp|Q15389|ANGP1_HUMAN Angiopoietin-1 OS=Homo sapiens GN=ANGPT1 PE=1 SV=2
ANGPTL2	0.561101	0.382017	0.466868	0.732394	0.654177	0.537819	0.768638	0.666518	0.633468	0.701568	0.683947	0.872156	0.113943	0.214844	0.271842	0.342423	0.361728	0.303196	PREDICTED: angiopoietin-related protein 2 [Pelodiscus sinensis]<>XP_006130816.1 PREDICTED: angiopoietin-related protein 2 [Pelodiscus sinensis]	GO:0070062	extracellular exosome	-	-	-	-	-	-	gnl|BL_ORD_ID|276665;sp|Q9UKU9|ANGL2_HUMAN	sp|Q9UKU9|ANGL2_HUMAN Angiopoietin-related protein 2 OS=Homo sapiens GN=ANGPTL2 PE=2 SV=1;sp|Q9UKU9|ANGL2_HUMAN Angiopoietin-related protein 2 OS=Homo sapiens GN=ANGPTL2 PE=2 SV=1
ANK1	0.862131	0.334454	0.267172	0.837588	0.827369	0.720986	0.738781	0.710117	0.565848	0.733197	0.472756	0.643453	0.252853	0.456366	0.220108	0.369216	0.146128	0.416641	PREDICTED: LOW QUALITY PROTEIN: ankyrin-1 [Chelonia mydas];PREDICTED: LOW QUALITY PROTEIN: ankyrin-1, partial [Pelodiscus sinensis]	GO:0005737;GO:0007165;GO:0030673;GO:0031430;GO:0005886;GO:0030507;GO:0010638;GO:0014731;GO:0042383;GO:0005198;GO:0045199;GO:0016323;GO:0072661;GO:0030018;GO:0005515;GO:0005856;GO:0007010;GO:0051117;GO:0016529;GO:0005829;GO:0045211;GO:0005634;GO:0005200;GO:0008093;GO:0006888;GO:0019899;GO:0006887	cytoplasm;signal transduction;axolemma;M band;plasma membrane;spectrin binding;positive regulation of organelle organization;spectrin-associated cytoskeleton;sarcolemma;structural molecule activity;maintenance of epithelial cell apical/basal polarity;basolateral plasma membrane;protein targeting to plasma membrane;Z disc;protein binding;cytoskeleton;cytoskeleton organization;ATPase binding;sarcop…	K10380	ANK	http://www.genome.jp/dbget-bin/www_bget?ko:K10380	Toll and Imd signaling pathway	ko04624	KOG4177(M)(Ankyrin)	sp|Q02357|ANK1_MOUSE;sp|P16157|ANK1_HUMAN;gnl|BL_ORD_ID|276668	sp|Q02357|ANK1_MOUSE Ankyrin-1 OS=Mus musculus GN=Ank1 PE=1 SV=2;sp|P16157|ANK1_HUMAN Ankyrin-1 OS=Homo sapiens GN=ANK1 PE=1 SV=3;sp|Q02357|ANK1_MOUSE Ankyrin-1 OS=Mus musculus GN=Ank1 PE=1 SV=2
ANK2	0.862131	0.989005	0.773786	0.818226	0.741152	0.850646	0.997386	0.920123	0.928396	0.904174	0.940516	1.02653	0.594393	0.837588	0.931458	0.736397	0.909021	0.836324	PREDICTED: ankyrin-2 isoform X16 [Pseudopodoces humilis];PREDICTED: ankyrin-2 [Meleagris gallopavo];PREDICTED: ankyrin-2 isoform X6 [Coturnix japonica];PREDICTED: ankyrin-2 isoform X5 [Coturnix japonica];PREDICTED: ankyrin-2 [Pelodiscus sinensis];PREDICTED: ankyrin-2 isoform X8 [Crocodylus porosus]	GO:0098910;GO:0014704;GO:0030315;GO:0005622;GO:0070972;GO:1901019;GO:0043005;GO:0051597;GO:0033365;GO:0010881;GO:0006874;GO:0005886;GO:0030507;GO:0036309;GO:0031672;GO:1901021;GO:0086014;GO:0003283;GO:0072661;GO:0016324;GO:0086066;GO:0019901;GO:0086015;GO:0005856;GO:0010628;GO:0045121;GO:0034613;GO:0007010;GO:0051928;GO:0086070;GO:0051924;GO:0005829;GO:2001259;GO:0045211;GO:0086005;GO:0072659;GO:…	regulation of atrial cardiac muscle cell action potential;intercalated disc;T-tubule;intracellular;protein localization to endoplasmic reticulum;regulation of calcium ion transmembrane transporter activity;neuron projection;response to methylmercury;protein localization to organelle;regulation of cardiac muscle contraction by regulation of the release of sequestered calcium ion;cellular calcium i…	K10380	ANK	http://www.genome.jp/dbget-bin/www_bget?ko:K10380	Toll and Imd signaling pathway	ko04624	KOG0504(R)(FOG: Ankyrin repeat);KOG4177(M)(Ankyrin)	gnl|BL_ORD_ID|276669;sp|Q01484|ANK2_HUMAN;sp|Q8C8R3|ANK2_MOUSE	sp|Q01484|ANK2_HUMAN Ankyrin-2 OS=Homo sapiens GN=ANK2 PE=1 SV=4;sp|Q01484|ANK2_HUMAN Ankyrin-2 OS=Homo sapiens GN=ANK2 PE=1 SV=4;sp|Q8C8R3|ANK2_MOUSE Ankyrin-2 OS=Mus musculus GN=Ank2 PE=1 SV=2
ANKDD1A	0.536558	0.779596	0.561101	0.708421	0.649335	0.698101	0.49276	0.659916	0.683047	0.673942	0.660865	0.725912	0.243038	0.120574	0.149219	0.507856	0.374748	0.290035	PREDICTED: ankyrin repeat and death domain-containing protein 1A [Pelodiscus sinensis]	GO:0007165	signal transduction	-	-	-	-	-	KOG4177(M)(Ankyrin)	sp|Q495B1|AKD1A_HUMAN;gnl|BL_ORD_ID|270978;sp|Q9GKW8|AND1A_MACFA	sp|Q495B1|AKD1A_HUMAN Ankyrin repeat and death domain-containing protein 1A OS=Homo sapiens GN=ANKDD1A PE=2 SV=2;sp|Q495B1|AKD1A_HUMAN Ankyrin repeat and death domain-containing protein 1A OS=Homo sapiens GN=ANKDD1A PE=2 SV=2;sp|Q9GKW8|AND1A_MACFA Ankyrin repeat and death domain-containing protein 1A (Fragment) OS=Macaca fascicularis GN=ANKDD1A PE=2 SV=3
ANKDD1B	0.394452	0.651278	0.553883	0.409933	0.378398	0.424882	0.50515	0.604226	0.552668	0.535294	0.579784	0.4843	0.747412	0.434569	0.829947	0.85309	0.691081	0.837588	PREDICTED: ankyrin repeat and death domain-containing protein 1B isoform X4 [Pelodiscus sinensis];PREDICTED: ankyrin repeat and death domain-containing protein 1B isoform X3 [Pelodiscus sinensis];PREDICTED: ankyrin repeat and death domain-containing protein 1B isoform X2 [Pelodiscus sinensis];PREDICTED: ankyrin repeat and death domain-containing protein 1B isoform X5 [Pelodiscus sinensis];PREDICT…	GO:0007165	signal transduction	-	-	-	-	-	KOG4177(M)(Ankyrin)	gnl|BL_ORD_ID|276930;sp|A6NHY2|AKD1B_HUMAN	sp|A6NHY2|AKD1B_HUMAN Ankyrin repeat and death domain-containing protein 1B OS=Homo sapiens GN=ANKDD1B PE=4 SV=3;sp|A6NHY2|AKD1B_HUMAN Ankyrin repeat and death domain-containing protein 1B OS=Homo sapiens GN=ANKDD1B PE=4 SV=3
ANKLE1	0.541579	0.287802	0.313867	0.532754	0.775246	0.532754	0.456366	0.611723	0.423246	0.526339	0.567026	0.569374	0.09691	0.176091	0.11059	0.0606978	0.0827854	0.146128	PREDICTED: ankyrin repeat and LEM domain-containing protein 1 [Pelodiscus sinensis]	-	-	-	-	-	-	-	KOG0504(R)(FOG: Ankyrin repeat);KOG4177(M)(Ankyrin)	gnl|BL_ORD_ID|274701;sp|Q8NAG6|ANKL1_HUMAN	sp|Q8NAG6|ANKL1_HUMAN Ankyrin repeat and LEM domain-containing protein 1 OS=Homo sapiens GN=ANKLE1 PE=1 SV=2;sp|Q8NAG6|ANKL1_HUMAN Ankyrin repeat and LEM domain-containing protein 1 OS=Homo sapiens GN=ANKLE1 PE=1 SV=2
ANKLE2	1.04297	1.06183	0.928908	0.830589	0.704151	0.860937	1.23045	1.11793	1.02036	1.01787	0.822822	0.905256	0.788875	1.00043	0.959995	0.745075	0.70757	0.657056	PREDICTED: LOW QUALITY PROTEIN: E3 ubiquitin-protein ligase UHRF2 [Chelonia mydas];PREDICTED: alpha-2-macroglobulin-like [Chrysemys picta bellii];PREDICTED: ankyrin repeat and LEM domain-containing protein 2 [Pelodiscus sinensis]	-	-	K15713;K05136	UHRF2,NIRF;IL20RA	http://www.genome.jp/dbget-bin/www_bget?ko:K15713;http://www.genome.jp/dbget-bin/www_bget?ko:K05136	Jak-STAT signaling pathway;Cytokine-cytokine receptor interaction	ko04630,ko04060	-	gnl|BL_ORD_ID|284525;sp|Q86XL3|ANKL2_HUMAN	sp|Q86XL3|ANKL2_HUMAN Ankyrin repeat and LEM domain-containing protein 2 OS=Homo sapiens GN=ANKLE2 PE=1 SV=4;sp|Q86XL3|ANKL2_HUMAN Ankyrin repeat and LEM domain-containing protein 2 OS=Homo sapiens GN=ANKLE2 PE=1 SV=4
ANKRD11	1.3438	1.46997	1.47246	1.00732	1.06221	1.01953	1.11327	0.990339	1.02816	1.15776	1.11394	1.11694	0.845098	0.838219	0.814913	0.926342	0.869818	0.957128	PREDICTED: ankyrin repeat domain-containing protein 11 isoform X3 [Pelodiscus sinensis];PREDICTED: ankyrin repeat domain-containing protein 11 isoform X2 [Pelodiscus sinensis]	GO:0005737;GO:0005654;GO:0005886;GO:0060325;GO:0048705;GO:0060348;GO:0042475;GO:0001894;GO:0060323;GO:0035264;GO:0005634	cytoplasm;nucleoplasm;plasma membrane;face morphogenesis;skeletal system morphogenesis;bone development;odontogenesis of dentin-containing tooth;tissue homeostasis;head morphogenesis;multicellular organism growth;nucleus	-	-	-	-	-	KOG0504(R)(FOG: Ankyrin repeat)	sp|Q6UB99|ANR11_HUMAN;gnl|BL_ORD_ID|275669	sp|Q6UB99|ANR11_HUMAN Ankyrin repeat domain-containing protein 11 OS=Homo sapiens GN=ANKRD11 PE=1 SV=3;sp|Q6UB99|ANR11_HUMAN Ankyrin repeat domain-containing protein 11 OS=Homo sapiens GN=ANKRD11 PE=1 SV=3
ANKRD12	0.985875	1.0461	1.05115	0.528917	0.440909	0.363612	0.643453	0.532754	0.604226	0.710117	0.620136	0.64836	0.434569	0.482874	0.423246	0.469822	0.474216	0.487138	PREDICTED: ankyrin repeat domain-containing protein 12 isoform X2 [Pelodiscus sinensis];PREDICTED: ankyrin repeat domain-containing protein 12 isoform X1 [Pelodiscus sinensis]	GO:0005737;GO:0005654	cytoplasm;nucleoplasm	-	-	-	-	-	KOG4177(M)(Ankyrin)	sp|Q6UB98|ANR12_HUMAN;gnl|BL_ORD_ID|279776	sp|Q6UB98|ANR12_HUMAN Ankyrin repeat domain-containing protein 12 OS=Homo sapiens GN=ANKRD12 PE=1 SV=3;sp|Q6UB98|ANR12_HUMAN Ankyrin repeat domain-containing protein 12 OS=Homo sapiens GN=ANKRD12 PE=1 SV=3
ANKRD22	0.0681859	0.371068	0.468347	0.127105	0.354108	0	0.30963	0.380211	0.338456	0.654177	0.38739	0.437751	0.769377	0.578639	0.807535	0.857935	0.61595	0.733999	PREDICTED: ankyrin repeat domain-containing protein 22 isoform X2 [Pelodiscus sinensis];PREDICTED: ankyrin repeat domain-containing protein 22 isoform X2 [Anas platyrhynchos];PREDICTED: ankyrin repeat domain-containing protein 22 isoform X1 [Pelodiscus sinensis]	GO:0016021;GO:0016020	integral component of membrane;membrane	-	-	-	-	-	KOG4177(M)(Ankyrin)	gnl|BL_ORD_ID|283141;sp|Q5VYY1|ANR22_HUMAN;gnl|BL_ORD_ID|275201	sp|Q5VYY1|ANR22_HUMAN Ankyrin repeat domain-containing protein 22 OS=Homo sapiens GN=ANKRD22 PE=2 SV=1;sp|Q5VYY1|ANR22_HUMAN Ankyrin repeat domain-containing protein 22 OS=Homo sapiens GN=ANKRD22 PE=2 SV=1;sp|Q9D3J5|ANR22_MOUSE Ankyrin repeat domain-containing protein 22 OS=Mus musculus GN=Ankrd22 PE=2 SV=1
ANKRD23	0.759668	0.773055	0.812913	1.11261	1.24055	1.0892	1.08099	0.810904	1.01494	0.896526	0.927883	0.873902	0.902003	0.621176	0.674861	0.900913	0.87564	1.07188	PREDICTED: ankyrin repeat domain-containing protein 23 [Pelodiscus sinensis]	GO:0005737;GO:0005654;GO:0030017;GO:0031432;GO:0015629;GO:0042692	cytoplasm;nucleoplasm;sarcomere;titin binding;actin cytoskeleton;muscle cell differentiation	-	-	-	-	-	-	sp|Q86SG2|ANR23_HUMAN;gnl|BL_ORD_ID|276329	sp|Q86SG2|ANR23_HUMAN Ankyrin repeat domain-containing protein 23 OS=Homo sapiens GN=ANKRD23 PE=1 SV=1;sp|Q86SG2|ANR23_HUMAN Ankyrin repeat domain-containing protein 23 OS=Homo sapiens GN=ANKRD23 PE=1 SV=1
ANKRD24	0.536558	0.365488	0.781037	1.30016	1.27138	0.892651	0.472756	0.4133	0.807535	0.728354	0.638489	0.62941	0.344392	0.403121	0.424882	0.761176	0.803457	0.719331	PREDICTED: LOW QUALITY PROTEIN: ankyrin repeat domain-containing protein 24 [Pelodiscus sinensis]	-	-	-	-	-	-	-	KOG4177(M)(Ankyrin)	gnl|BL_ORD_ID|283507;sp|Q8TF21|ANR24_HUMAN;sp|Q80VM7|ANR24_MOUSE	sp|Q8TF21|ANR24_HUMAN Ankyrin repeat domain-containing protein 24 OS=Homo sapiens GN=ANKRD24 PE=2 SV=2;sp|Q8TF21|ANR24_HUMAN Ankyrin repeat domain-containing protein 24 OS=Homo sapiens GN=ANKRD24 PE=2 SV=2;sp|Q80VM7|ANR24_MOUSE Ankyrin repeat domain-containing protein 24 OS=Mus musculus GN=Ankrd24 PE=2 SV=4
ANKS1B	0.662758	0.807535	0.746634	0.608526	0.550228	0.641474	0.58995	0.534026	0.654177	0.635484	0.572872	0.603144	0.232996	0.230449	0.164353	0.257679	0.285557	0.267172	PREDICTED: ankyrin repeat and sterile alpha motif domain-containing protein 1B isoform X1 [Pelodiscus sinensis];PREDICTED: ankyrin repeat and sterile alpha motif domain-containing protein 1B isoform X1 [Chrysemys picta bellii];PREDICTED: ankyrin repeat and sterile alpha motif domain-containing protein 1B isoform X3 [Chrysemys picta bellii];PREDICTED: ankyrin repeat and sterile alpha motif domain-…	-	-	-	-	-	-	-	KOG0507(T)(CASK-interacting adaptor protein (caskin) and related proteins with ankyrin repeats and SAM domain);KOG3536(R)(Adaptor protein CED-6, contains PTB domain)	gnl|BL_ORD_ID|280762;sp|Q7Z6G8|ANS1B_HUMAN;sp|P0C6S7|ANS1B_RAT	sp|P0C6S7|ANS1B_RAT Ankyrin repeat and sterile alpha motif domain-containing protein 1B OS=Rattus norvegicus GN=Anks1b PE=1 SV=1;sp|Q7Z6G8|ANS1B_HUMAN Ankyrin repeat and sterile alpha motif domain-containing protein 1B OS=Homo sapiens GN=ANKS1B PE=1 SV=2;sp|P0C6S7|ANS1B_RAT Ankyrin repeat and sterile alpha motif domain-containing protein 1B OS=Rattus norvegicus GN=Anks1b PE=1 SV=1
ANLN	1.17289	1.1364	1.18639	1.2584	1.04139	1.15836	0.907949	1.00689	1.01452	1.055	0.992111	1.1682	0.654177	0.622214	0.651278	0.556303	0.771587	0.63749	PREDICTED: actin-binding protein anillin isoform X2 [Pelodiscus sinensis];PREDICTED: actin-binding protein anillin isoform X1 [Pelodiscus sinensis]	GO:0005654;GO:0002244;GO:0090521;GO:0005826;GO:0043231;GO:0003779;GO:0000281;GO:0015629	nucleoplasm;hematopoietic progenitor cell differentiation;glomerular visceral epithelial cell migration;actomyosin contractile ring;intracellular membrane-bounded organelle;actin binding;mitotic cytokinesis;actin cytoskeleton	K18621	ANLN	http://www.genome.jp/dbget-bin/www_bget?ko:K18621	-	-	KOG3640(DZ)(Actin binding protein Anillin)	sp|Q9NQW6|ANLN_HUMAN;gnl|BL_ORD_ID|283096	sp|Q9NQW6|ANLN_HUMAN Anillin OS=Homo sapiens GN=ANLN PE=1 SV=2;sp|Q9NQW6|ANLN_HUMAN Anillin OS=Homo sapiens GN=ANLN PE=1 SV=2
ANO8	0.788875	0.599883	0.639486	0.982271	1.09237	0.943989	0.901458	0.816904	0.702431	0.836324	0.80618	0.869818	0.399674	0.378398	0.392697	0.356026	0.474216	0.553883	PREDICTED: anoctamin-8 [Pelodiscus sinensis]	-	-	K19502	ANO8,TMEM16H	http://www.genome.jp/dbget-bin/www_bget?ko:K19502	-	-	KOG2513(D)(Protein required for meiotic chromosome segregation)	gnl|BL_ORD_ID|275197	sp|Q9HCE9|ANO8_HUMAN Anoctamin-8 OS=Homo sapiens GN=ANO8 PE=1 SV=3
ANOS1	0.531479	0.639486	0.641474	0.618048	0.572872	0.414973	0.475671	0.495544	0.644439	0.55145	0.657056	0.720159	0.155336	0.10721	0.178977	0.127105	0.240549	0.278754	PREDICTED: LOW QUALITY PROTEIN: anosmin-1 [Pelodiscus sinensis]	GO:0005576;GO:0030414	extracellular region;peptidase inhibitor activity	-	-	-	-	-	KOG4802(W)(Adhesion-type protein )	sp|P33005|KALM_CHICK;gnl|BL_ORD_ID|64248;sp|P23352|KALM_HUMAN	sp|P33005|KALM_CHICK Anosmin-1 OS=Gallus gallus GN=ANOS1 PE=2 SV=2;sp|P33005|KALM_CHICK Anosmin-1 OS=Gallus gallus GN=ANOS1 PE=2 SV=2;sp|P23352|KALM_HUMAN Anosmin-1 OS=Homo sapiens GN=ANOS1 PE=1 SV=3
ANXA13	0.139879	0.382017	0.450249	0.232996	0.278754	0.232996	0.146128	0.296665	0.424882	0.240549	0.296665	0.303196	0.71433	0.298853	0.361728	0.647383	0.883093	0.563481	PREDICTED: annexin A13 [Pelodiscus sinensis]	GO:0005509;GO:0005544	calcium ion binding;calcium-dependent phospholipid binding	K17099	ANXA13	http://www.genome.jp/dbget-bin/www_bget?ko:K17099	-	-	KOG0819(U)(Annexin)	gnl|BL_ORD_ID|275695;sp|P27216|ANX13_HUMAN	sp|P27216|ANX13_HUMAN Annexin A13 OS=Homo sapiens GN=ANXA13 PE=1 SV=3;sp|P27216|ANX13_HUMAN Annexin A13 OS=Homo sapiens GN=ANXA13 PE=1 SV=3
AOAH	0.783189	0.904174	0.679428	0.851258	0.793092	0.783904	0.679428	0.728354	0.557507	0.78533	0.681241	0.979548	0.152288	0.209515	0.247973	0.235528	0.11059	0.392697	PREDICTED: acyloxyacyl hydrolase [Pelodiscus sinensis]	-	-	K01065	AOAH	http://www.genome.jp/dbget-bin/www_bget?ko:K01065	-	-	-	sp|O35298|AOAH_MOUSE;gnl|BL_ORD_ID|279785;sp|P28039|AOAH_HUMAN	sp|O35298|AOAH_MOUSE Acyloxyacyl hydrolase OS=Mus musculus GN=Aoah PE=2 SV=1;sp|P28039|AOAH_HUMAN Acyloxyacyl hydrolase OS=Homo sapiens GN=AOAH PE=1 SV=1;sp|P28039|AOAH_HUMAN Acyloxyacyl hydrolase OS=Homo sapiens GN=AOAH PE=1 SV=1
APC2	0.0681859	0.0334238	0.064458	0.396199	0.478566	0.20412	0.31597	0.255273	0.311754	0.292256	0.303196	0.517196	0.152288	0.139879	0.120574	0.152288	0.103804	0.269513	PREDICTED: LOW QUALITY PROTEIN: adenomatous polyposis coli protein 2 [Pelodiscus sinensis]	-	-	K02085	APC	http://www.genome.jp/dbget-bin/www_bget?ko:K02085	Regulation of actin cytoskeleton;Signaling pathways regulating pluripotency of stem cells;Hippo signaling pathway;Wnt signaling pathway	ko04810,ko04550,ko04390,ko04310	KOG2122(TZ)(Beta-catenin-binding protein APC, contains ARM repeats)	gnl|BL_ORD_ID|284669;sp|O95996|APCL_HUMAN	sp|O95996|APCL_HUMAN Adenomatous polyposis coli protein 2 OS=Homo sapiens GN=APC2 PE=1 SV=1;sp|O95996|APCL_HUMAN Adenomatous polyposis coli protein 2 OS=Homo sapiens GN=APC2 PE=1 SV=1
APELA	0.876795	0.985426	0.691081	0.991226	0.64836	0.977724	0.876218	1.01242	0.925828	1.07628	1.02694	0.969882	0.781755	0.676694	0.747412	0.846955	0.750508	0.889302	PREDICTED: apelin receptor early endogenous ligand [Pelodiscus sinensis]	-	-	-	-	-	-	-	-	sp|P0DMC3|ELA_HUMAN;gnl|BL_ORD_ID|376012	sp|P0DMC3|ELA_HUMAN Apelin receptor early endogenous ligand OS=Homo sapiens GN=APELA PE=2 SV=1;sp|P0DMC3|ELA_HUMAN Apelin receptor early endogenous ligand OS=Homo sapiens GN=APELA PE=2 SV=1
APITD1	1.29181	1.32879	1.34577	1.44248	1.256	1.22968	1.17898	1.29885	1.31618	1.23654	1.14983	1.3566	0.660865	0.720159	0.64836	0.599883	0.998695	0.793092	PREDICTED: centromere protein S [Pelodiscus sinensis]	GO:0071821;GO:0046982	FANCM-MHF complex;protein heterodimerization activity	K11511	APITD1,CENPS,MHF1	http://www.genome.jp/dbget-bin/www_bget?ko:K11511	Fanconi anemia pathway	ko03460	-	gnl|BL_ORD_ID|329087;sp|Q8N2Z9|CENPS_HUMAN	sp|Q8N2Z9|CENPS_HUMAN Centromere protein S OS=Homo sapiens GN=CENPS PE=1 SV=1;sp|Q8N2Z9|CENPS_HUMAN Centromere protein S OS=Homo sapiens GN=CENPS PE=1 SV=1
APOA5	0.117271	0.11059	0	0	0	0	0	0.0211893	0	0.133539	0.592177	0.0863598	0	0.0334238	0.0569049	0.120574	0	0.0170333	PREDICTED: apolipoprotein A-V isoform X1 [Pelodiscus sinensis]	GO:0070328;GO:0034361;GO:0042157;GO:0050996;GO:0060229;GO:0006869;GO:0006810;GO:0035473;GO:0051006;GO:0050750;GO:0010898;GO:0042627;GO:0070325;GO:0005576;GO:0005543;GO:0045723;GO:0060230;GO:0005615;GO:0031210;GO:0008289;GO:0008047;GO:0019433;GO:0010902;GO:0034364;GO:0019899	triglyceride homeostasis;very-low-density lipoprotein particle;lipoprotein metabolic process;positive regulation of lipid catabolic process;lipase activator activity;lipid transport;transport;lipase binding;positive regulation of lipoprotein lipase activity;low-density lipoprotein particle receptor binding;positive regulation of triglyceride catabolic process;chylomicron;lipoprotein particle rece…	K09025	APOA5	http://www.genome.jp/dbget-bin/www_bget?ko:K09025	PPAR signaling pathway	ko03320	-	gnl|BL_ORD_ID|287161	sp|Q6Q788|APOA5_HUMAN Apolipoprotein A-V OS=Homo sapiens GN=APOA5 PE=1 SV=1
APPBP2	0.542825	0.680336	0.576341	0.4843	0.558709	0.514548	0.899821	0.853698	0.758912	0.913814	0.829304	0.905256	0.374748	0.568202	0.445604	0.401401	0.489958	0.606381	PREDICTED: amyloid protein-binding protein 2 [Chrysemys picta bellii]	-	-	-	-	-	-	-	KOG1840(Z)(Kinesin light chain)	sp|Q92624|APBP2_HUMAN;gnl|BL_ORD_ID|282268	sp|Q92624|APBP2_HUMAN Amyloid protein-binding protein 2 OS=Homo sapiens GN=APPBP2 PE=1 SV=2;sp|Q92624|APBP2_HUMAN Amyloid protein-binding protein 2 OS=Homo sapiens GN=APPBP2 PE=1 SV=2
APPL1	0.450249	0.489958	0.367356	0.322219	0.445604	0.403121	0.866878	0.788168	0.691965	0.816241	0.814913	0.87564	0.429752	0.596597	0.557507	0.432969	0.5302	0.509203	PREDICTED: DCC-interacting protein 13-alpha isoform X1 [Pelodiscus sinensis];PREDICTED: DCC-interacting protein 13-alpha isoform X2 [Pelodiscus sinensis]	GO:0042593;GO:0070062;GO:0042802;GO:0016581;GO:0046324;GO:0010008;GO:0090003;GO:0008283;GO:0005829;GO:0012506;GO:0043422;GO:0005634	glucose homeostasis;extracellular exosome;identical protein binding;NuRD complex;regulation of glucose import;endosome membrane;regulation of establishment of protein localization to plasma membrane;cell proliferation;cytosol;vesicle membrane;protein kinase B binding;nucleus	K08733	APPL1,DIP13A	http://www.genome.jp/dbget-bin/www_bget?ko:K08733	Longevity regulating pathway - mammal	ko04211	KOG0521(T)(Putative GTPase activating proteins (GAPs))	gnl|BL_ORD_ID|361775;sp|Q9UKG1|DP13A_HUMAN	sp|Q9UKG1|DP13A_HUMAN DCC-interacting protein 13-alpha OS=Homo sapiens GN=APPL1 PE=1 SV=1;sp|Q9UKG1|DP13A_HUMAN DCC-interacting protein 13-alpha OS=Homo sapiens GN=APPL1 PE=1 SV=1
AR	0.303196	0.206826	0.318063	0.123852	0.489958	0.235528	0.943	0.690196	0.570543	0.868056	0.755112	0.865696	0.32838	0.634477	0.359835	0.392697	0.469822	0.414973	PREDICTED: LOW QUALITY PROTEIN: androgen receptor [Pelodiscus sinensis];PREDICTED: androgen receptor [Sorex araneus]	-	-	K08557	NR3C4,AR	http://www.genome.jp/dbget-bin/www_bget?ko:K08557	Oocyte meiosis	ko04114	KOG4215(K)(Hepatocyte nuclear factor 4 and similar steroid hormone receptors);KOG4218(K)(Nuclear hormone receptor betaFTZ-F1);KOG3575(T)(FOG: Hormone receptors)	sp|Q9TT90|ANDR_CANLF;sp|Q8MIK0|ANDR_CROCR;gnl|BL_ORD_ID|276257;sp|P19091|ANDR_MOUSE	sp|Q9TT90|ANDR_CANLF Androgen receptor OS=Canis lupus familiaris GN=AR PE=2 SV=1;sp|Q8MIK0|ANDR_CROCR Androgen receptor OS=Crocuta crocuta GN=AR PE=2 SV=1;sp|O97776|ANDR_EULFC Androgen receptor OS=Eulemur fulvus collaris GN=AR PE=2 SV=1;sp|P19091|ANDR_MOUSE Androgen receptor OS=Mus musculus GN=Ar PE=1 SV=1
AREG	0.32838	0.511883	0.363612	0.346353	0.139879	0.357935	0.421604	0.555094	0.434569	0.630428	0.390935	0.474216	0.815578	0.668386	0.861534	0.426511	0.482874	0.666518	PREDICTED: amphiregulin [Pelodiscus sinensis]	-	-	K09782	AREG	http://www.genome.jp/dbget-bin/www_bget?ko:K09782	ErbB signaling pathway;Hippo signaling pathway	ko04012,ko04390	-	gnl|BL_ORD_ID|281137;sp|P15514|AREG_HUMAN	sp|P24338|AREG_RAT Amphiregulin OS=Rattus norvegicus GN=Areg PE=1 SV=1;sp|P15514|AREG_HUMAN Amphiregulin OS=Homo sapiens GN=AREG PE=1 SV=2
ARGLU1	1.47698	1.65447	1.63094	0.440909	0.521138	0.735599	0.426511	0.220108	0.243038	0.348305	0.369216	0.133539	0.313867	0.418301	0	0.487138	0.158362	0.146128	similar to hypothetical protein FLJ10154, isoform CRA_c [Rattus norvegicus]	GO:0005654;GO:0005739;GO:0098641;GO:0016021;GO:0005913;GO:0098609	nucleoplasm;mitochondrion;cadherin binding involved in cell-cell adhesion;integral component of membrane;cell-cell adherens junction;cell-cell adhesion	K13173	ARGLU1	http://www.genome.jp/dbget-bin/www_bget?ko:K13173	-	-	-	-	-
ARHGAP15	0.635484	0.457882	0.724276	0.313867	0.611723	0.49693	0.995196	0.926342	0.752048	0.856729	0.683047	0.662758	0.682145	1.39393	0.951338	0.426511	0.767156	0.773786	PREDICTED: rho GTPase-activating protein 15 [Pelodiscus sinensis]	-	-	-	-	-	-	-	KOG1451(T)(Oligophrenin-1 and related Rho GTPase-activating proteins)	sp|Q5ZMM3|RHG15_CHICK;gnl|BL_ORD_ID|166950	sp|Q5ZMM3|RHG15_CHICK Rho GTPase-activating protein 15 OS=Gallus gallus GN=ARHGAP15 PE=2 SV=1;sp|Q5ZMM3|RHG15_CHICK Rho GTPase-activating protein 15 OS=Gallus gallus GN=ARHGAP15 PE=2 SV=1
ARHGAP26	0.750508	0.758912	0.669317	0.416641	0.661813	0.611723	1.03543	1.03383	0.952792	1.08955	0.873321	1.01326	0.912753	1.23096	1.13672	0.833147	1.04376	1.08565	PREDICTED: rho GTPase-activating protein 26 isoform X2 [Pelodiscus sinensis];PREDICTED: rho GTPase-activating protein 26 isoform X2 [Equus asinus];PREDICTED: rho GTPase-activating protein 26 isoform X1 [Pelodiscus sinensis];PREDICTED: rho GTPase-activating protein 26 [Chrysochloris asiatica]	GO:0030036;GO:0051056;GO:0007165;GO:0005543;GO:0005096	actin cytoskeleton organization;regulation of small GTPase mediated signal transduction;signal transduction;phospholipid binding;GTPase activator activity	K20071	ARHGAP26,GRAF	http://www.genome.jp/dbget-bin/www_bget?ko:K20071	-	-	KOG1453(T)(Chimaerin and related Rho GTPase activating proteins);KOG1451(T)(Oligophrenin-1 and related Rho GTPase-activating proteins)	sp|Q9UNA1|RHG26_HUMAN;sp|Q5ZMW5|RHG26_CHICK;gnl|BL_ORD_ID|166956	sp|Q9UNA1|RHG26_HUMAN Rho GTPase-activating protein 26 OS=Homo sapiens GN=ARHGAP26 PE=1 SV=1;sp|Q5ZMW5|RHG26_CHICK Rho GTPase-activating protein 26 OS=Gallus gallus GN=ARHGAP26 PE=1 SV=2;sp|Q5ZMW5|RHG26_CHICK Rho GTPase-activating protein 26 OS=Gallus gallus GN=ARHGAP26 PE=1 SV=2
ARHGAP35	0.782473	0.722634	0.585461	0.653213	0.928908	0.742725	1.30514	1.24279	1.11126	1.3145	1.266	1.4014	0.71433	0.839478	0.741152	0.745075	0.833784	0.862728	PREDICTED: rho GTPase-activating protein 35 [Pelodiscus sinensis]	GO:0005737;GO:0008360;GO:0051056;GO:0003677;GO:0036064;GO:0000122;GO:0007264;GO:0005886;GO:0007413;GO:0032956;GO:0043116;GO:0030879;GO:0045892;GO:0045724;GO:0030900;GO:0001843;GO:0003714;GO:0043547;GO:0030950;GO:0005829;GO:0050770;GO:0031668;GO:0008064;GO:0097485;GO:0010976;GO:0035024;GO:0007165;GO:0001227;GO:0000977;GO:0044319;GO:0006351;GO:0005543;GO:0043087;GO:0005096;GO:0016477;GO:0043010;GO:…	cytoplasm;regulation of cell shape;regulation of small GTPase mediated signal transduction;DNA binding;ciliary basal body;negative regulation of transcription from RNA polymerase II promoter;small GTPase mediated signal transduction;plasma membrane;axonal fasciculation;regulation of actin cytoskeleton organization;negative regulation of vascular permeability;mammary gland development;negative reg…	K05732	GRLF1	http://www.genome.jp/dbget-bin/www_bget?ko:K05732	Regulation of actin cytoskeleton;Focal adhesion;Leukocyte transendothelial migration;Platelet activation	ko04810,ko04510,ko04670,ko04611	KOG1453(T)(Chimaerin and related Rho GTPase activating proteins)	sp|Q9NRY4|RHG35_HUMAN;sp|P83509|RHG35_CANLF;gnl|BL_ORD_ID|156250	sp|Q9NRY4|RHG35_HUMAN Rho GTPase-activating protein 35 OS=Homo sapiens GN=ARHGAP35 PE=1 SV=3;sp|P83509|RHG35_CANLF Rho GTPase-activating protein 35 OS=Canis lupus familiaris GN=ARHGAP35 PE=2 SV=1;sp|P83509|RHG35_CANLF Rho GTPase-activating protein 35 OS=Canis lupus familiaris GN=ARHGAP35 PE=2 SV=1
ARHGAP36	0.489958	0.374748	0.419956	0.762679	0.733197	0.755875	0.423246	0.501059	0.622214	0.536558	0.399674	0.588832	0.334454	0.322219	0.240549	0.372912	0.428135	0.426511	PREDICTED: rho GTPase-activating protein 36 [Pelodiscus sinensis]	-	-	-	-	-	-	-	KOG2710(TZ)(Rho GTPase-activating protein)	sp|O54834|RHG06_MOUSE;sp|O43182|RHG06_HUMAN;gnl|BL_ORD_ID|166399	sp|O54834|RHG06_MOUSE Rho GTPase-activating protein 6 OS=Mus musculus GN=Arhgap6 PE=1 SV=3;sp|O43182|RHG06_HUMAN Rho GTPase-activating protein 6 OS=Homo sapiens GN=ARHGAP6 PE=1 SV=3;sp|O54834|RHG06_MOUSE Rho GTPase-activating protein 6 OS=Mus musculus GN=Arhgap6 PE=1 SV=3
ARHGAP44	0.579784	0.653213	0.690196	0.820858	0.807535	0.729974	0.580925	0.477121	0.621176	0.414973	0.557507	0.466868	0.418301	0.338456	0.367356	0.561101	0.501059	0.521138	PREDICTED: rho GTPase-activating protein 44 [Pelodiscus sinensis]	-	-	-	-	-	-	-	KOG4406(TZ)(CDC42 Rho GTPase-activating protein);KOG4270(T)(GTPase-activator protein)	sp|Q5SSM3|RHG44_MOUSE;sp|Q17R89|RHG44_HUMAN;gnl|BL_ORD_ID|165302	sp|Q5SSM3|RHG44_MOUSE Rho GTPase-activating protein 44 OS=Mus musculus GN=Arhgap44 PE=1 SV=1;sp|Q17R89|RHG44_HUMAN Rho GTPase-activating protein 44 OS=Homo sapiens GN=ARHGAP44 PE=1 SV=1;sp|Q17R89|RHG44_HUMAN Rho GTPase-activating protein 44 OS=Homo sapiens GN=ARHGAP44 PE=1 SV=1
ARHGAP5	0.974051	1.10106	0.97359	0.780317	0.935003	0.845718	1.19368	1.13767	1.06408	1.22115	1.08636	1.15137	0.868056	0.844477	0.824776	0.863917	0.869818	0.866287	PREDICTED: rho GTPase-activating protein 5 isoform X2 [Pelodiscus sinensis];PREDICTED: rho GTPase-activating protein 5 isoform X1 [Pelodiscus sinensis]	GO:0005737;GO:0007264;GO:0042169;GO:0007165;GO:0005783;GO:0005525	cytoplasm;small GTPase mediated signal transduction;SH2 domain binding;signal transduction;endoplasmic reticulum;GTP binding	K13709	ARHGAP5	http://www.genome.jp/dbget-bin/www_bget?ko:K13709	Focal adhesion;Leukocyte transendothelial migration	ko04510,ko04670	-	sp|P97393|RHG05_MOUSE;sp|Q13017|RHG05_HUMAN;gnl|BL_ORD_ID|166947	sp|P97393|RHG05_MOUSE Rho GTPase-activating protein 5 OS=Mus musculus GN=Arhgap5 PE=1 SV=2;sp|Q13017|RHG05_HUMAN Rho GTPase-activating protein 5 OS=Homo sapiens GN=ARHGAP5 PE=1 SV=2;sp|Q13017|RHG05_HUMAN Rho GTPase-activating protein 5 OS=Homo sapiens GN=ARHGAP5 PE=1 SV=2
ARHGAP6	0.79796	0.62941	0.767898	0.924796	0.865696	0.857332	0.784617	0.838849	0.882525	0.96708	0.880242	0.957128	0.382017	0.380211	0.537819	0.600973	0.597695	0.649335	PREDICTED: rho GTPase-activating protein 6 [Pelodiscus sinensis]	GO:0005737;GO:0048041;GO:0043274;GO:0010518;GO:0043547;GO:0007165;GO:0051895;GO:0043087;GO:0005096;GO:0007015;GO:0016004;GO:0007202;GO:0051497;GO:0015629	cytoplasm;focal adhesion assembly;phospholipase binding;positive regulation of phospholipase activity;positive regulation of GTPase activity;signal transduction;negative regulation of focal adhesion assembly;regulation of GTPase activity;GTPase activator activity;actin filament organization;phospholipase activator activity;activation of phospholipase C activity;negative regulation of stress fiber…	-	-	-	-	-	KOG2710(TZ)(Rho GTPase-activating protein)	sp|O54834|RHG06_MOUSE;gnl|BL_ORD_ID|166399	sp|O54834|RHG06_MOUSE Rho GTPase-activating protein 6 OS=Mus musculus GN=Arhgap6 PE=1 SV=3;sp|O54834|RHG06_MOUSE Rho GTPase-activating protein 6 OS=Mus musculus GN=Arhgap6 PE=1 SV=3
ARHGEF12	0.627366	0.488551	0.480007	0.49276	0.721811	0.546543	1.05843	0.982271	0.851258	1.09656	1.00561	1.11926	0.49693	0.697229	0.660865	0.633468	0.61595	0.710963	PREDICTED: rho guanine nucleotide exchange factor 12 isoform X1 [Pelodiscus sinensis];PREDICTED: rho guanine nucleotide exchange factor 12 isoform X2 [Pelodiscus sinensis]	GO:0005085;GO:0005737;GO:0070062;GO:0007186;GO:0035023;GO:0005089;GO:0001664;GO:0035556	guanyl-nucleotide exchange factor activity;cytoplasm;extracellular exosome;G-protein coupled receptor signaling pathway;regulation of Rho protein signal transduction;Rho guanyl-nucleotide exchange factor activity;G-protein coupled receptor binding;intracellular signal transduction	K07532	ARHGEF12,LARG	http://www.genome.jp/dbget-bin/www_bget?ko:K07532	Regulation of actin cytoskeleton;Vascular smooth muscle contraction;Axon guidance;Platelet activation	ko04810,ko04270,ko04360,ko04611	KOG3520(T)(Predicted guanine nucleotide exchange factor)	gnl|BL_ORD_ID|282726;sp|Q9NZN5|ARHGC_HUMAN	sp|Q9NZN5|ARHGC_HUMAN Rho guanine nucleotide exchange factor 12 OS=Homo sapiens GN=ARHGEF12 PE=1 SV=1;sp|Q9NZN5|ARHGC_HUMAN Rho guanine nucleotide exchange factor 12 OS=Homo sapiens GN=ARHGEF12 PE=1 SV=1
ARHGEF17	0.294466	0.264818	0.230449	0.40654	0.698101	0.382017	0.865696	0.854913	0.684845	0.962843	0.881385	0.992111	0.354108	0.531479	0.454845	0.541579	0.542825	0.526339	PREDICTED: rho guanine nucleotide exchange factor 17 isoform X1 [Pelodiscus sinensis];PREDICTED: rho guanine nucleotide exchange factor 17 isoform X2 [Pelodiscus sinensis]	GO:0005085;GO:0030036;GO:0043547;GO:0035023;GO:0005089	guanyl-nucleotide exchange factor activity;actin cytoskeleton organization;positive regulation of GTPase activity;regulation of Rho protein signal transduction;Rho guanyl-nucleotide exchange factor activity	-	-	-	-	-	KOG3522(T)(Predicted guanine nucleotide exchange factor)	gnl|BL_ORD_ID|280140	sp|Q96PE2|ARHGH_HUMAN Rho guanine nucleotide exchange factor 17 OS=Homo sapiens GN=ARHGEF17 PE=1 SV=1
ARHGEF25	0.32838	0.463893	0.380211	0.537819	0.519828	0.49276	0.255273	0.235528	0.230449	0.238046	0.399674	0.225309	0.220108	0.178977	0.161368	0.264818	0.176091	0.326336	PREDICTED: rho guanine nucleotide exchange factor 25, partial [Pelodiscus sinensis]	GO:0005085;GO:0004672;GO:0005524;GO:0004674;GO:0035023;GO:0005089;GO:0006468	guanyl-nucleotide exchange factor activity;protein kinase activity;ATP binding;protein serine/threonine kinase activity;regulation of Rho protein signal transduction;Rho guanyl-nucleotide exchange factor activity;protein phosphorylation	K08810	TRIO	http://www.genome.jp/dbget-bin/www_bget?ko:K08810	-	-	KOG0689(T)(Guanine nucleotide exchange factor for Rho and Rac GTPases)	sp|Q0KL02|TRIO_MOUSE;gnl|BL_ORD_ID|231025	sp|Q0KL02|TRIO_MOUSE Triple functional domain protein OS=Mus musculus GN=Trio PE=1 SV=3;sp|Q0KL02|TRIO_MOUSE Triple functional domain protein OS=Mus musculus GN=Trio PE=1 SV=3
ARHGEF26	0.544068	0.633468	0.624282	0.429752	0.44248	0.514548	0.633468	0.584331	0.571709	0.647383	0.62634	0.555094	0.605305	0.61595	0.611723	0.70927	0.671173	0.686636	PREDICTED: rho guanine nucleotide exchange factor 26 isoform X1 [Pelodiscus sinensis]<>XP_014429302.1 PREDICTED: rho guanine nucleotide exchange factor 26 isoform X1 [Pelodiscus sinensis];PREDICTED: rho guanine nucleotide exchange factor 26 isoform X2 [Pelodiscus sinensis]	GO:0035023;GO:0005089;GO:0097178;GO:0001886	regulation of Rho protein signal transduction;Rho guanyl-nucleotide exchange factor activity;ruffle assembly;endothelial cell morphogenesis	K13744	SGEF,ARHGEF26	http://www.genome.jp/dbget-bin/www_bget?ko:K13744	-	-	KOG3523(T)(Putative guanine nucleotide exchange factor TIM)	sp|Q96DR7|ARHGQ_HUMAN;gnl|BL_ORD_ID|282729	sp|Q96DR7|ARHGQ_HUMAN Rho guanine nucleotide exchange factor 26 OS=Homo sapiens GN=ARHGEF26 PE=1 SV=4;sp|Q96DR7|ARHGQ_HUMAN Rho guanine nucleotide exchange factor 26 OS=Homo sapiens GN=ARHGEF26 PE=1 SV=4
ARHGEF38	0.0413927	0.130334	0.146128	0.064458	0.0413927	0.0569049	0.167317	0.130334	0.120574	0.152288	0.0827854	0.064458	0.257679	0.222716	0.190332	0.322219	0.25042	0.31597	PREDICTED: rho guanine nucleotide exchange factor 38 [Pelodiscus sinensis]	GO:0005737;GO:0035023;GO:0005089	cytoplasm;regulation of Rho protein signal transduction;Rho guanyl-nucleotide exchange factor activity	-	-	-	-	-	KOG3519(T)(Invasion-inducing protein TIAM1/CDC24 and related RhoGEF GTPases)	sp|Q9NXL2|ARH38_HUMAN;gnl|BL_ORD_ID|280134	sp|Q9NXL2|ARH38_HUMAN Rho guanine nucleotide exchange factor 38 OS=Homo sapiens GN=ARHGEF38 PE=2 SV=2;sp|Q9NXL2|ARH38_HUMAN Rho guanine nucleotide exchange factor 38 OS=Homo sapiens GN=ARHGEF38 PE=2 SV=2
ARHGEF4	0.802089	0.613842	0.640481	0.924279	0.845098	0.774517	0.818885	0.749736	0.719331	0.798651	0.802089	0.838219	0.439333	0.350248	0.271842	0.572872	0.511883	0.531479	PREDICTED: LOW QUALITY PROTEIN: rho guanine nucleotide exchange factor 4 [Chrysemys picta bellii];PREDICTED: rho guanine nucleotide exchange factor 4 isoform X1 [Pelodiscus sinensis]	-	-	K05769	ARHGEF4,ASEF	http://www.genome.jp/dbget-bin/www_bget?ko:K05769	Regulation of actin cytoskeleton	ko04810	KOG3519(T)(Invasion-inducing protein TIAM1/CDC24 and related RhoGEF GTPases)	sp|Q9NR80|ARHG4_HUMAN;gnl|BL_ORD_ID|284973	sp|Q9NR80|ARHG4_HUMAN Rho guanine nucleotide exchange factor 4 OS=Homo sapiens GN=ARHGEF4 PE=1 SV=3;sp|Q9NR80|ARHG4_HUMAN Rho guanine nucleotide exchange factor 4 OS=Homo sapiens GN=ARHGEF4 PE=1 SV=3
ARID4A	1.1827	1.26435	1.29994	1.02898	0.964731	0.984077	1.01912	0.912222	1.00389	0.976808	0.93852	1.01494	0.733999	0.802089	0.863323	0.896526	0.869818	0.855519	PREDICTED: AT-rich interactive domain-containing protein 4A isoform X2 [Pelodiscus sinensis]	-	-	K19194	ARID4A,RBP1	http://www.genome.jp/dbget-bin/www_bget?ko:K19194	-	-	KOG2744(K)(DNA-binding proteins Bright/BRCAA1/RBP1 and related proteins containing BRIGHT domain)	sp|P29374|ARI4A_HUMAN;gnl|BL_ORD_ID|280146	sp|P29374|ARI4A_HUMAN AT-rich interactive domain-containing protein 4A OS=Homo sapiens GN=ARID4A PE=1 SV=3;sp|P29374|ARI4A_HUMAN AT-rich interactive domain-containing protein 4A OS=Homo sapiens GN=ARID4A PE=1 SV=3
ARNT2	0.959518	0.987219	0.896526	1.05614	0.977266	1.02938	0.940018	0.91803	0.924796	0.950365	0.957607	1.00389	0.612784	0.583199	0.597695	0.628389	0.634477	0.699838	PREDICTED: aryl hydrocarbon receptor nuclear translocator 2 isoform X3 [Pelodiscus sinensis];PREDICTED: aryl hydrocarbon receptor nuclear translocator 2 isoform X6 [Pelodiscus sinensis];PREDICTED: aryl hydrocarbon receptor nuclear translocator 2 isoform X2 [Pelodiscus sinensis];PREDICTED: aryl hydrocarbon receptor nuclear translocator 2 isoform X1 [Pelodiscus sinensis];PREDICTED: aryl hydrocarbon…	GO:0005737;GO:0014070;GO:0003677;GO:0046983;GO:0009410;GO:0046982;GO:0005667;GO:0006351;GO:0034751;GO:0003700;GO:0006355;GO:0005634	cytoplasm;response to organic cyclic compound;DNA binding;protein dimerization activity;response to xenobiotic stimulus;protein heterodimerization activity;transcription factor complex;transcription, DNA-templated;aryl hydrocarbon receptor complex;transcription factor activity, sequence-specific DNA binding;regulation of transcription, DNA-templated;nucleus	K15589	ARNT2	http://www.genome.jp/dbget-bin/www_bget?ko:K15589	-	-	KOG3561(K)(Aryl-hydrocarbon receptor nuclear translocator)	gnl|BL_ORD_ID|289328;sp|Q9HBZ2|ARNT2_HUMAN	sp|Q9HBZ2|ARNT2_HUMAN Aryl hydrocarbon receptor nuclear translocator 2 OS=Homo sapiens GN=ARNT2 PE=1 SV=2;sp|Q9HBZ2|ARNT2_HUMAN Aryl hydrocarbon receptor nuclear translocator 2 OS=Homo sapiens GN=ARNT2 PE=1 SV=2
ARPP21	0.401401	0.357935	0.403121	0.713491	0.536558	0.424882	0.546543	0.534026	0.49693	0.371068	0.767156	0.550228	0.164353	0.11059	0.190332	0.247973	0.1959	0.164353	PREDICTED: cAMP-regulated phosphoprotein 21 isoform X6 [Pelodiscus sinensis];PREDICTED: cAMP-regulated phosphoprotein 21 isoform X3 [Pelodiscus sinensis];PREDICTED: cAMP-regulated phosphoprotein 21 isoform X5 [Pelodiscus sinensis];PREDICTED: cAMP-regulated phosphoprotein 21 isoform X2 [Pelodiscus sinensis];PREDICTED: cAMP-regulated phosphoprotein 21 isoform X1 [Pelodiscus sinensis]<>XP_014429534.…	GO:0034605;GO:0003676	cellular response to heat;nucleic acid binding	-	-	-	-	-	KOG2953(A)(mRNA-binding protein Encore)	sp|Q9UBL0|ARP21_HUMAN;gnl|BL_ORD_ID|286459	sp|Q9UBL0|ARP21_HUMAN cAMP-regulated phosphoprotein 21 OS=Homo sapiens GN=ARPP21 PE=1 SV=2;sp|Q9UBL0|ARP21_HUMAN cAMP-regulated phosphoprotein 21 OS=Homo sapiens GN=ARPP21 PE=1 SV=2
ARRB1	0.708421	0.287802	0.617	0.526339	0.768638	0.519828	0.833147	0.757396	0.797268	0.935003	0.992111	0.996074	0.499687	0.481443	0.550228	0.635484	0.513218	0.74351	PREDICTED: beta-arrestin-1 isoform X1 [Alligator sinensis]<>KYO37790.1 arrestin-C isoform A [Alligator mississippiensis];PREDICTED: beta-arrestin-1 isoform X2 [Pelodiscus sinensis];PREDICTED: beta-arrestin-1 isoform X3 [Pelodiscus sinensis];PREDICTED: beta-arrestin-1 isoform X1 [Pelodiscus sinensis]	GO:0031434;GO:0031625;GO:0005737;GO:0031143;GO:0032088;GO:0005654;GO:0005622;GO:0033138;GO:0043027;GO:0031701;GO:0035774;GO:0032717;GO:0016567;GO:0005829;GO:0043161;GO:0007165;GO:0045944;GO:0090240;GO:0035066;GO:0005159;GO:0000785;GO:0044212;GO:0008134;GO:0005096;GO:0031410;GO:0005634	mitogen-activated protein kinase kinase binding;ubiquitin protein ligase binding;cytoplasm;pseudopodium;negative regulation of NF-kappaB transcription factor activity;nucleoplasm;intracellular;positive regulation of peptidyl-serine phosphorylation;cysteine-type endopeptidase inhibitor activity involved in apoptotic process;angiotensin receptor binding;positive regulation of insulin secretion invo…	K04439	ARRB	http://www.genome.jp/dbget-bin/www_bget?ko:K04439	Endocytosis;Hedgehog signaling pathway;MAPK signaling pathway;Chemokine signaling pathway;Olfactory transduction	ko04144,ko04340,ko04010,ko04062,ko04740	KOG3865(T)(Arrestin)	sp|Q4R562|ARRB1_MACFA;gnl|BL_ORD_ID|295714;gnl|BL_ORD_ID|289614;sp|P49407|ARRB1_HUMAN	sp|Q4R562|ARRB1_MACFA Beta-arrestin-1 OS=Macaca fascicularis GN=ARRB1 PE=2 SV=1;sp|Q4R562|ARRB1_MACFA Beta-arrestin-1 OS=Macaca fascicularis GN=ARRB1 PE=2 SV=1;sp|P49407|ARRB1_HUMAN Beta-arrestin-1 OS=Homo sapiens GN=ARRB1 PE=1 SV=2;sp|P49407|ARRB1_HUMAN Beta-arrestin-1 OS=Homo sapiens GN=ARRB1 PE=1 SV=2
ARSB	0.797268	0.723456	0.696356	0.676694	0.767156	0.811575	1.07262	1.06558	1.12969	1.11727	1.01284	1.14082	0.811575	1.03423	1.17898	0.944483	1.01284	1.20222	PREDICTED: LOW QUALITY PROTEIN: arylsulfatase B [Pelodiscus sinensis]	GO:0070062;GO:0008152;GO:0003824;GO:0010632;GO:0061580;GO:0008484;GO:0003943	extracellular exosome;metabolic process;catalytic activity;regulation of epithelial cell migration;colon epithelial cell migration;sulfuric ester hydrolase activity;N-acetylgalactosamine-4-sulfatase activity	K01135	ARSB	http://www.genome.jp/dbget-bin/www_bget?ko:K01135	Lysosome;Glycosaminoglycan degradation	ko04142,ko00531	KOG3867(R)(Sulfatase)	sp|P15848|ARSB_HUMAN;sp|P50430|ARSB_RAT;gnl|BL_ORD_ID|299070	sp|P15848|ARSB_HUMAN Arylsulfatase B OS=Homo sapiens GN=ARSB PE=1 SV=1;sp|P50430|ARSB_RAT Arylsulfatase B OS=Rattus norvegicus GN=Arsb PE=2 SV=2;sp|P15848|ARSB_HUMAN Arylsulfatase B OS=Homo sapiens GN=ARSB PE=1 SV=1
ARSI	0.768638	0.653213	0.650308	1.05538	1.03262	0.993877	0.903633	0.826075	0.907411	0.888179	0.923762	1.09517	0.243038	0.313867	0.170262	0.488551	0.555094	0.698101	PREDICTED: LOW QUALITY PROTEIN: arylsulfatase I [Pelodiscus sinensis]	GO:0008152;GO:0003824;GO:0008484	metabolic process;catalytic activity;sulfuric ester hydrolase activity	K12375	ARSI_J	http://www.genome.jp/dbget-bin/www_bget?ko:K12375	-	-	KOG3867(R)(Sulfatase)	sp|Q32KI9|ARSI_MOUSE;gnl|BL_ORD_ID|299078	sp|Q32KI9|ARSI_MOUSE Arylsulfatase I OS=Mus musculus GN=Arsi PE=2 SV=1;sp|Q5FYB1|ARSI_HUMAN Arylsulfatase I OS=Homo sapiens GN=ARSI PE=1 SV=1
ARX	0.292256	0.0827854	0.155336	0.948902	0.808886	0.568202	0.459392	0.382017	0.517196	0.509203	0.657056	0.463893	0	0	0.0170333	0.58995	0.426511	0.403121	homeobox protein ARX [Alligator mississippiensis];PREDICTED: homeobox protein ARX isoform X1 [Pelodiscus sinensis];PREDICTED: homeobox protein ARX [Crocodylus porosus]	-	-	K09452	ARX	http://www.genome.jp/dbget-bin/www_bget?ko:K09452	-	-	KOG0484(K)(Transcription factor PHOX2/ARIX, contains HOX domain);KOG0490(R)(Transcription factor, contains HOX domain)	gnl|BL_ORD_ID|290737;sp|A6YP92|ARX_RAT;gnl|BL_ORD_ID|298346;sp|O35085|ARX_MOUSE;sp|Q96QS3|ARX_HUMAN	sp|O35085|ARX_MOUSE Homeobox protein ARX OS=Mus musculus GN=Arx PE=1 SV=3;sp|A6YP92|ARX_RAT Homeobox protein ARX OS=Rattus norvegicus GN=Arx PE=2 SV=1;sp|A6YP92|ARX_RAT Homeobox protein ARX OS=Rattus norvegicus GN=Arx PE=2 SV=1;sp|O35085|ARX_MOUSE Homeobox protein ARX OS=Mus musculus GN=Arx PE=1 SV=3;sp|Q96QS3|ARX_HUMAN Homeobox protein ARX OS=Homo sapiens GN=ARX PE=1 SV=1
ASAH2	0.720986	0.657056	0.428135	0.285557	0.591065	0.436163	0.819544	1.03583	0.50515	0.613842	0.91698	0.655138	0.591065	0.846337	0.950365	0.575188	0.803457	0.697229	PREDICTED: neutral ceramidase isoform X2 [Pelodiscus sinensis];PREDICTED: neutral ceramidase isoform X1 [Pelodiscus sinensis]<>XP_006121528.1 PREDICTED: neutral ceramidase isoform X1 [Pelodiscus sinensis]<>XP_006121529.1 PREDICTED: neutral ceramidase isoform X1 [Pelodiscus sinensis]<>XP_006121530.1 PREDICTED: neutral ceramidase isoform X1 [Pelodiscus sinensis]<>XP_006121531.1 PREDICTED: neutral c…	GO:0005739;GO:0017040;GO:0016021;GO:0016020	mitochondrion;ceramidase activity;integral component of membrane;membrane	K12349	ASAH2	http://www.genome.jp/dbget-bin/www_bget?ko:K12349	Sphingolipid signaling pathway;Sphingolipid metabolism	ko04071,ko00600	-	sp|Q9NR71|ASAH2_HUMAN;gnl|BL_ORD_ID|298357	sp|Q9NR71|ASAH2_HUMAN Neutral ceramidase OS=Homo sapiens GN=ASAH2 PE=1 SV=2;sp|Q9NR71|ASAH2_HUMAN Neutral ceramidase OS=Homo sapiens GN=ASAH2 PE=1 SV=2
ASAP2	0.855519	1.05038	0.938019	0.793092	0.829304	0.854913	0.987666	0.957128	1.02036	1.12613	1.02284	1.05308	0.840733	0.955207	0.940516	1.01703	0.940516	0.940516	PREDICTED: arf-GAP with SH3 domain, ANK repeat and PH domain-containing protein 2 isoform X3 [Pelodiscus sinensis];PREDICTED: arf-GAP with SH3 domain, ANK repeat and PH domain-containing protein 2 isoform X1 [Pelodiscus sinensis];PREDICTED: arf-GAP with SH3 domain, ANK repeat and PH domain-containing protein 2 isoform X2 [Pelodiscus sinensis];PREDICTED: arf-GAP with SH3 domain, ANK repeat and PH …	-	-	K12488	ASAP	http://www.genome.jp/dbget-bin/www_bget?ko:K12488	Endocytosis;Fc gamma R-mediated phagocytosis	ko04144,ko04666	KOG4177(M)(Ankyrin);KOG2199(T)(Signal transducing adaptor protein STAM/STAM2);KOG0521(T)(Putative GTPase activating proteins (GAPs))	gnl|BL_ORD_ID|299103;sp|Q7SIG6|ASAP2_MOUSE;gnl|BL_ORD_ID|291254;sp|O43150|ASAP2_HUMAN	sp|Q7SIG6|ASAP2_MOUSE Arf-GAP with SH3 domain, ANK repeat and PH domain-containing protein 2 OS=Mus musculus GN=Asap2 PE=1 SV=3;sp|Q7SIG6|ASAP2_MOUSE Arf-GAP with SH3 domain, ANK repeat and PH domain-containing protein 2 OS=Mus musculus GN=Asap2 PE=1 SV=3;sp|O43150|ASAP2_HUMAN Arf-GAP with SH3 domain, ANK repeat and PH domain-containing protein 2 OS=Homo sapiens GN=ASAP2 PE=1 SV=3;sp|O43150|ASAP2…
ASB16	0	0	0	0.385606	0.257679	0.526339	0.367356	0.0530784	0.225309	0.212188	0.352183	0.365488	0.313867	0.00860017	0	0.103804	0.127105	0	PREDICTED: ankyrin repeat and SOCS box protein 16 [Pelodiscus sinensis]	GO:0016567;GO:0035556	protein ubiquitination;intracellular signal transduction	K10338	ASB16	http://www.genome.jp/dbget-bin/www_bget?ko:K10338	-	-	KOG4177(M)(Ankyrin)	gnl|BL_ORD_ID|286508	sp|Q8VHS5|ASB16_MOUSE Ankyrin repeat and SOCS box protein 16 OS=Mus musculus GN=Asb16 PE=2 SV=1
ASCC3	0.788168	0.829947	0.752816	0.662758	0.691965	0.647383	0.878522	0.842609	0.78533	0.866878	0.822168	0.856729	0.565848	0.728354	0.664642	0.578639	0.697229	0.745855	PREDICTED: LOW QUALITY PROTEIN: activating signal cointegrator 1 complex subunit 3 [Pelodiscus sinensis]	GO:0005737;GO:0005622;GO:0005524;GO:0044822;GO:0004386;GO:0008283;GO:0016020;GO:0006307;GO:0000166;GO:0003676;GO:0043140;GO:0016787;GO:0032508;GO:0005794	cytoplasm;intracellular;ATP binding;RNA binding;helicase activity;cell proliferation;membrane;DNA dealkylation involved in DNA repair;nucleotide binding;nucleic acid binding;ATP-dependent 3'-5' DNA helicase activity;hydrolase activity;DNA duplex unwinding;Golgi apparatus	K18663	ASCC3	http://www.genome.jp/dbget-bin/www_bget?ko:K18663	-	-	KOG0952(A)(DNA/RNA helicase MER3/SLH1, DEAD-box superfamily)	sp|F1NTD6|ASCC3_CHICK;gnl|BL_ORD_ID|291266	sp|F1NTD6|ASCC3_CHICK Activating signal cointegrator 1 complex subunit 3 OS=Gallus gallus GN=ascc3 PE=3 SV=2;sp|F1NTD6|ASCC3_CHICK Activating signal cointegrator 1 complex subunit 3 OS=Gallus gallus GN=ascc3 PE=3 SV=2
ASIC1	0.416641	0.212188	0.238046	0.635484	0.628389	0.354108	0.485721	0.419956	0.617	0.52763	0.678518	0.766413	0.0569049	0.11059	0.0899051	0.11059	0.117271	0.103804	PREDICTED: acid-sensing ion channel 1 isoform X1 [Pelodiscus sinensis];PREDICTED: acid-sensing ion channel 1 isoform X2 [Pelodiscus sinensis]<>XP_014433083.1 PREDICTED: acid-sensing ion channel 1 isoform X2 [Pelodiscus sinensis]<>XP_014433084.1 PREDICTED: acid-sensing ion channel 1 isoform X2 [Pelodiscus sinensis]<>XP_014433085.1 PREDICTED: acid-sensing ion channel 1 isoform X2 [Pelodiscus sinens…	GO:0005272;GO:0009408;GO:0050968;GO:0050965;GO:0005886;GO:0006814;GO:0006810;GO:0034220;GO:0042930;GO:0070588;GO:0016021;GO:0045202;GO:0070207;GO:0006811;GO:0050907;GO:0005261;GO:0010447;GO:0050915;GO:0016020;GO:0005887;GO:0042931;GO:0042391;GO:0007613;GO:0022839;GO:0035725;GO:0044736;GO:0071467;GO:0015280;GO:0008306;GO:0046929	sodium channel activity;response to heat;detection of chemical stimulus involved in sensory perception of pain;detection of temperature stimulus involved in sensory perception of pain;plasma membrane;sodium ion transport;transport;ion transmembrane transport;enterobactin transport;calcium ion transmembrane transport;integral component of membrane;synapse;protein homotrimerization;ion transport;de…	K04829	ASIC1,ACCN2,BNAC2	http://www.genome.jp/dbget-bin/www_bget?ko:K04829	Inflammatory mediator regulation of TRP channels	ko04750	-	sp|Q1XA76|ASIC1_CHICK;gnl|BL_ORD_ID|300788	sp|Q1XA76|ASIC1_CHICK Acid-sensing ion channel 1 OS=Gallus gallus GN=ASIC1 PE=1 SV=1;sp|Q1XA76|ASIC1_CHICK Acid-sensing ion channel 1 OS=Gallus gallus GN=ASIC1 PE=1 SV=1
ASIP	0.276462	0.161368	0.278754	0.434569	0.348305	0.363612	0.450249	0.568202	0.404834	0.817565	0.738781	1.03782	0.0681859	0.0413927	0.045323	0.164353	0.136721	0.10721	PREDICTED: agouti-signaling protein isoform X2 [Pelodiscus sinensis];PREDICTED: agouti-signaling protein isoform X1 [Pelodiscus sinensis];PREDICTED: agouti-signaling protein isoform X3 [Pelodiscus sinensis]	-	-	K08725	ASIP	http://www.genome.jp/dbget-bin/www_bget?ko:K08725	Melanogenesis	ko04916	-	gnl|BL_ORD_ID|290126;sp|Q29414|ASIP_BOVIN	sp|Q29414|ASIP_BOVIN Agouti-signaling protein OS=Bos taurus GN=ASIP PE=2 SV=2;sp|Q29414|ASIP_BOVIN Agouti-signaling protein OS=Bos taurus GN=ASIP PE=2 SV=2
ASNS	0.972203	0.810904	0.889862	0.781755	0.839478	0.848189	0.946452	0.974972	0.856729	1	0.883661	0.988559	0.598791	0.682145	0.414973	0.448706	0.423246	0.5302	PREDICTED: asparagine synthetase [glutamine-hydrolyzing] [Pelodiscus sinensis]	GO:0006529;GO:0045931;GO:0042149;GO:0043066;GO:0004066	asparagine biosynthetic process;positive regulation of mitotic cell cycle;cellular response to glucose starvation;negative regulation of apoptotic process;asparagine synthase (glutamine-hydrolyzing) activity	K01953	asnB,ASNS	http://www.genome.jp/dbget-bin/www_bget?ko:K01953	Alanine, aspartate and glutamate metabolism	ko00250	KOG0571(E)(Asparagine synthase (glutamine-hydrolyzing))	sp|Q5ZJU3|ASNS_CHICK;gnl|BL_ORD_ID|289684	sp|Q5ZJU3|ASNS_CHICK Asparagine synthetase [glutamine-hydrolyzing] OS=Gallus gallus GN=ASNS PE=2 SV=3;sp|Q5ZJU3|ASNS_CHICK Asparagine synthetase [glutamine-hydrolyzing] OS=Gallus gallus GN=ASNS PE=2 SV=3
ASPM	1.31069	1.33506	1.3566	1.25066	1.07188	1.11694	0.941511	0.914872	1.15806	0.962369	0.910624	1.04805	0.685742	0.550228	0.706718	0.521138	0.865104	0.680336	PREDICTED: abnormal spindle-like microcephaly-associated protein [Pelodiscus sinensis]	-	-	K16743	ASPM,ASP	http://www.genome.jp/dbget-bin/www_bget?ko:K16743	-	-	KOG0165(Z)(Microtubule-associated protein Asp)	sp|P62290|ASPM_HYLLA;gnl|BL_ORD_ID|290793	sp|P62290|ASPM_HYLLA Abnormal spindle-like microcephaly-associated protein homolog OS=Hylobates lar GN=ASPM PE=3 SV=1;sp|P62290|ASPM_HYLLA Abnormal spindle-like microcephaly-associated protein homolog OS=Hylobates lar GN=ASPM PE=3 SV=1
ASRGL1	0.64836	0.841985	0.914872	0.542825	0.794488	0.608526	1.15442	1.06893	0.959995	0.994757	1.09026	0.905256	0.567026	1.11327	1.01578	0.906874	0.821514	1.01745	PREDICTED: isoaspartyl peptidase/L-asparaginase isoform X2 [Pelodiscus sinensis];PREDICTED: isoaspartyl peptidase/L-asparaginase isoform X1 [Pelodiscus sinensis]	GO:0033345;GO:0004067;GO:0008798;GO:0016787;GO:0005634	asparagine catabolic process via L-aspartate;asparaginase activity;beta-aspartyl-peptidase activity;hydrolase activity;nucleus	K13051	iaaA,ASRGL1	http://www.genome.jp/dbget-bin/www_bget?ko:K13051	-	-	KOG1592(E)(Asparaginase)	gnl|BL_ORD_ID|286646;sp|Q6GM78|ASGL1_XENLA	sp|Q6GM78|ASGL1_XENLA Isoaspartyl peptidase/L-asparaginase OS=Xenopus laevis GN=asrgl1 PE=2 SV=1;sp|Q6GM78|ASGL1_XENLA Isoaspartyl peptidase/L-asparaginase OS=Xenopus laevis GN=asrgl1 PE=2 SV=1
ASTN1	0.365488	0.303196	0.447158	1.16286	0.804821	0.676694	0.699838	0.585461	0.739572	0.658965	0.61595	0.718502	0.170262	0.0827854	0.0899051	0.206826	0.0374265	0.269513	PREDICTED: astrotactin-1 [Pelodiscus sinensis]	GO:0009897;GO:0007158;GO:0005768;GO:0016021;GO:0016020;GO:0016337;GO:0001764;GO:0016477;GO:0007626	external side of plasma membrane;neuron cell-cell adhesion;endosome;integral component of membrane;membrane;single organismal cell-cell adhesion;neuron migration;cell migration;locomotory behavior	-	-	-	-	-	-	sp|Q61137|ASTN1_MOUSE;gnl|BL_ORD_ID|298581;sp|O14525|ASTN1_HUMAN	sp|Q61137|ASTN1_MOUSE Astrotactin-1 OS=Mus musculus GN=Astn1 PE=1 SV=4;sp|O14525|ASTN1_HUMAN Astrotactin-1 OS=Homo sapiens GN=ASTN1 PE=2 SV=3;sp|O14525|ASTN1_HUMAN Astrotactin-1 OS=Homo sapiens GN=ASTN1 PE=2 SV=3
ASZ1	0.167317	0.127105	0.143015	0.283301	0.716003	0.220108	0.100371	0.155336	0.385606	0.220108	0.374748	0.278754	0	0	0	0.181844	0.365488	0.240549	PREDICTED: ankyrin repeat, SAM and basic leucine zipper domain-containing protein 1 [Pelodiscus sinensis];PREDICTED: ankyrin repeat, SAM and basic leucine zipper domain-containing protein 1 [Chelonia mydas]	-	-	K18410	ASZ1,GASZ	http://www.genome.jp/dbget-bin/www_bget?ko:K18410	-	-	KOG4177(M)(Ankyrin)	gnl|BL_ORD_ID|291413;sp|A4D7T3|ASZ1_MACEU	sp|A4D7T3|ASZ1_MACEU Ankyrin repeat, SAM and basic leucine zipper domain-containing protein 1 OS=Macropus eugenii GN=ASZ1 PE=3 SV=1;sp|A4D7T3|ASZ1_MACEU Ankyrin repeat, SAM and basic leucine zipper domain-containing protein 1 OS=Macropus eugenii GN=ASZ1 PE=3 SV=1
ATAD2	1.39182	1.39393	1.39041	1.52009	1.42127	1.3298	1.23198	1.24452	1.31702	1.29491	1.36866	1.39533	0.753583	0.78746	0.705008	0.609594	0.885926	0.913284	PREDICTED: ATPase family AAA domain-containing protein 2 [Chelonia mydas];PREDICTED: ATPase family AAA domain-containing protein 2 [Pelodiscus sinensis];PREDICTED: ATPase family AAA domain-containing protein 2 isoform X3 [Chrysemys picta bellii]	GO:0070062;GO:0005654;GO:0005524;GO:0045893;GO:0003682;GO:0045944;GO:0042393;GO:0000166;GO:0006351;GO:0006325;GO:0016787;GO:0016887;GO:0031936;GO:0006355;GO:0005634	extracellular exosome;nucleoplasm;ATP binding;positive regulation of transcription, DNA-templated;chromatin binding;positive regulation of transcription from RNA polymerase II promoter;histone binding;nucleotide binding;transcription, DNA-templated;chromatin organization;hydrolase activity;ATPase activity;negative regulation of chromatin silencing;regulation of transcription, DNA-templated;nucleus	-	-	-	-	-	KOG1472(BK)(Histone acetyltransferase SAGA/ADA, catalytic subunit PCAF/GCN5 and related proteins);KOG0732(O)(AAA+-type ATPase containing the bromodomain)	gnl|BL_ORD_ID|292678;sp|Q5RDX4|ATAD2_PONAB;sp|Q6PL18|ATAD2_HUMAN	sp|Q6PL18|ATAD2_HUMAN ATPase family AAA domain-containing protein 2 OS=Homo sapiens GN=ATAD2 PE=1 SV=1;sp|Q5RDX4|ATAD2_PONAB ATPase family AAA domain-containing protein 2 OS=Pongo abelii GN=ATAD2 PE=2 SV=1;sp|Q6PL18|ATAD2_HUMAN ATPase family AAA domain-containing protein 2 OS=Homo sapiens GN=ATAD2 PE=1 SV=1
ATAD5	0.625312	0.7348	0.638489	0.647383	0.451786	0.584331	0.462398	0.531479	0.513218	0.600973	0.482874	0.606381	0.274158	0.294466	0.262451	0.20412	0.4133	0.322219	PREDICTED: ATPase family AAA domain-containing protein 5 [Pelodiscus sinensis]	GO:0005524;GO:0000166	ATP binding;nucleotide binding	-	-	-	-	-	KOG1968(L)(Replication factor C, subunit RFC1 (large subunit))	sp|Q96QE3|ATAD5_HUMAN;gnl|BL_ORD_ID|298605	sp|Q96QE3|ATAD5_HUMAN ATPase family AAA domain-containing protein 5 OS=Homo sapiens GN=ATAD5 PE=1 SV=4;sp|Q96QE3|ATAD5_HUMAN ATPase family AAA domain-containing protein 5 OS=Homo sapiens GN=ATAD5 PE=1 SV=4
ATP10D	0.469822	0.416641	0.322219	0.332438	0.30103	0.330414	0.802089	0.696356	0.510545	0.786751	0.687529	0.740363	0.276462	0.591065	0.385606	0.385606	0.307496	0.439333	PREDICTED: probable phospholipid-transporting ATPase VD [Pelodiscus sinensis]	-	-	K01530	E3.6.3.1	http://www.genome.jp/dbget-bin/www_bget?ko:K01530	-	-	KOG0206(R)(P-type ATPase)	sp|Q9P241|AT10D_HUMAN;gnl|BL_ORD_ID|288951	sp|Q9P241|AT10D_HUMAN Probable phospholipid-transporting ATPase VD OS=Homo sapiens GN=ATP10D PE=2 SV=3;sp|Q9P241|AT10D_HUMAN Probable phospholipid-transporting ATPase VD OS=Homo sapiens GN=ATP10D PE=2 SV=3
ATP11A	0.910624	0.946452	1.15259	0.788875	0.817565	0.882525	1.03543	0.914872	0.945469	0.999565	0.942504	1.12483	0.775974	1.07518	0.872156	0.842609	0.93044	0.973128	PREDICTED: probable phospholipid-transporting ATPase IH isoform X4 [Pelodiscus sinensis]<>XP_006139018.1 PREDICTED: probable phospholipid-transporting ATPase IH isoform X4 [Pelodiscus sinensis];PREDICTED: probable phospholipid-transporting ATPase IH isoform X3 [Pelodiscus sinensis]<>XP_006139016.1 PREDICTED: probable phospholipid-transporting ATPase IH isoform X3 [Pelodiscus sinensis];PREDICTED: …	GO:0005765;GO:0000287;GO:0005524;GO:0015914;GO:0016021;GO:0016020;GO:0000166;GO:0043231;GO:0005783;GO:0016787;GO:0055037;GO:0046872;GO:0004012	lysosomal membrane;magnesium ion binding;ATP binding;phospholipid transport;integral component of membrane;membrane;nucleotide binding;intracellular membrane-bounded organelle;endoplasmic reticulum;hydrolase activity;recycling endosome;metal ion binding;phospholipid-translocating ATPase activity	K01530	E3.6.3.1	http://www.genome.jp/dbget-bin/www_bget?ko:K01530	-	-	KOG0210(P)(P-type ATPase)	sp|P98197|AT11A_MOUSE;gnl|BL_ORD_ID|300895;sp|P98196|AT11A_HUMAN	sp|P98197|AT11A_MOUSE Probable phospholipid-transporting ATPase IH OS=Mus musculus GN=Atp11a PE=1 SV=1;sp|P98196|AT11A_HUMAN Probable phospholipid-transporting ATPase IH OS=Homo sapiens GN=ATP11A PE=1 SV=3;sp|P98196|AT11A_HUMAN Probable phospholipid-transporting ATPase IH OS=Homo sapiens GN=ATP11A PE=1 SV=3
ATP1B2	0.868644	0.833784	0.640481	0.89098	0.981819	0.751279	1.1685	1.10209	1.14768	1.14395	1.21906	1.0306	1.37566	1.04021	1.17493	1.50325	1.11561	1.40278	PREDICTED: sodium/potassium-transporting ATPase subunit beta-2 isoform X1 [Pelodiscus sinensis];PREDICTED: sodium/potassium-transporting ATPase subunit beta-2 isoform X2 [Pelodiscus sinensis]	GO:0016020;GO:0086009;GO:0005737;GO:0090662;GO:0005391;GO:1901018;GO:0006813;GO:0010107;GO:0010248;GO:0006883;GO:0005886;GO:0006814;GO:0006810;GO:0001671;GO:0032781;GO:0016324;GO:1903288;GO:0051117;GO:0030007;GO:0016021;GO:1903278;GO:0036376;GO:0006811;GO:0005890;GO:0050821	membrane;membrane repolarization;cytoplasm;ATP hydrolysis coupled transmembrane transport;sodium:potassium-exchanging ATPase activity;positive regulation of potassium ion transmembrane transporter activity;potassium ion transport;potassium ion import;establishment or maintenance of transmembrane electrochemical gradient;cellular sodium ion homeostasis;plasma membrane;sodium ion transport;transpor…	K01540	ATP1B	http://www.genome.jp/dbget-bin/www_bget?ko:K01540	cAMP signaling pathway;cGMP - PKG signaling pathway;Adrenergic signaling in cardiomyocytes;Cardiac muscle contraction;Bile secretion;Carbohydrate digestion and absorption;Gastric acid secretion;Mineral absorption;Pancreatic secretion;Protein digestion and absorption;Salivary secretion;Insulin secretion;Thyroid hormone signaling pathway;Thyroid hormone synthesis;Aldosterone-regulated sodium reabso…	ko04024,ko04022,ko04261,ko04260,ko04976,ko04973,ko04971,ko04978,ko04972,ko04974,ko04970,ko04911,ko04919,ko04918,ko04960,ko04961,ko04964	KOG3927(P)(Na+/K+ ATPase, beta subunit)	sp|Q5J583|AT1B2_OCHCU;gnl|BL_ORD_ID|288962	sp|Q5J583|AT1B2_OCHCU Sodium/potassium-transporting ATPase subunit beta-2 OS=Ochotona curzoniae GN=ATP1B2 PE=2 SV=1;sp|Q5J583|AT1B2_OCHCU Sodium/potassium-transporting ATPase subunit beta-2 OS=Ochotona curzoniae GN=ATP1B2 PE=2 SV=1
ATP2C2	0.845718	0.950365	1.01662	0.814913	0.703291	0.618048	0.726727	0.62941	0.790988	1.17725	0.585461	0.656098	0.983175	0.812245	1.03862	1.28511	1.03623	0.992111	PREDICTED: calcium-transporting ATPase type 2C member 2 isoform X4 [Pelodiscus sinensis];PREDICTED: calcium-transporting ATPase type 2C member 2 isoform X2 [Pelodiscus sinensis]<>XP_014434866.1 PREDICTED: calcium-transporting ATPase type 2C member 2 isoform X1 [Pelodiscus sinensis];PREDICTED: calcium-transporting ATPase type 2C member 2 isoform X3 [Pelodiscus sinensis]	-	-	K01537	E3.6.3.8	http://www.genome.jp/dbget-bin/www_bget?ko:K01537	-	-	KOG0202(P)(Ca2+ transporting ATPase);KOG0203(P)(Na+/K+ ATPase, alpha subunit)	gnl|BL_ORD_ID|296856;sp|O75185|AT2C2_HUMAN	sp|O75185|AT2C2_HUMAN Calcium-transporting ATPase type 2C member 2 OS=Homo sapiens GN=ATP2C2 PE=1 SV=2;sp|O75185|AT2C2_HUMAN Calcium-transporting ATPase type 2C member 2 OS=Homo sapiens GN=ATP2C2 PE=1 SV=2
ATP6V0A2	0.904174	1.07151	0.770852	0.699838	0.564666	0.779596	0.92993	0.973128	0.821514	0.740363	0.762679	0.7348	0.866878	0.97174	0.840733	0.695482	0.675778	0.579784	PREDICTED: V-type proton ATPase 116 kDa subunit a isoform 2 [Pelodiscus sinensis];PREDICTED: V-type proton ATPase 116 kDa subunit a isoform 2 isoform X4 [Chrysemys picta bellii]	GO:0015078;GO:0006810;GO:0016021;GO:0006811;GO:0033179;GO:0016020;GO:0015991;GO:0000220;GO:0015992	hydrogen ion transmembrane transporter activity;transport;integral component of membrane;ion transport;proton-transporting V-type ATPase, V0 domain;membrane;ATP hydrolysis coupled proton transport;vacuolar proton-transporting V-type ATPase, V0 domain;proton transport	K19361;K02154	TCTN2;ATPeV0A,ATP6N	http://www.genome.jp/dbget-bin/www_bget?ko:K19361;http://www.genome.jp/dbget-bin/www_bget?ko:K02154	Lysosome;Phagosome;Oxidative phosphorylation;Collecting duct acid secretion;Synaptic vesicle cycle	ko04142,ko04145,ko00190,ko04966,ko04721	KOG2189(C)(Vacuolar H+-ATPase V0 sector, subunit a)	gnl|BL_ORD_ID|516477;sp|P15920|VPP2_MOUSE;sp|A1A5G6|VPP1_XENTR	sp|Q9Y487|VPP2_HUMAN V-type proton ATPase 116 kDa subunit a isoform 2 OS=Homo sapiens GN=ATP6V0A2 PE=1 SV=2;sp|P15920|VPP2_MOUSE V-type proton ATPase 116 kDa subunit a isoform 2 OS=Mus musculus GN=Atp6v0a2 PE=1 SV=2;sp|A1A5G6|VPP1_XENTR V-type proton ATPase 116 kDa subunit a isoform 1 OS=Xenopus tropicalis GN=atp6v0a1 PE=2 SV=1
ATP6V0A4	0.507856	0.521138	0.354108	0.720986	0.544068	0.510545	0.862728	0.840733	0.655138	0.85248	0.738781	0.600973	0.773055	0.716003	1.13925	0.951823	0.691081	1.3962	PREDICTED: V-type proton ATPase 116 kDa subunit a isoform X1 [Gavialis gangeticus];PREDICTED: V-type proton ATPase 116 kDa subunit a isoform 4 [Pelodiscus sinensis]	GO:0015078;GO:0006810;GO:0016021;GO:0006811;GO:0033179;GO:0016020;GO:0015991;GO:0000220;GO:0015992	hydrogen ion transmembrane transporter activity;transport;integral component of membrane;ion transport;proton-transporting V-type ATPase, V0 domain;membrane;ATP hydrolysis coupled proton transport;vacuolar proton-transporting V-type ATPase, V0 domain;proton transport	K02154	ATPeV0A,ATP6N	http://www.genome.jp/dbget-bin/www_bget?ko:K02154	Lysosome;Phagosome;Oxidative phosphorylation;Collecting duct acid secretion;Synaptic vesicle cycle	ko04142,ko04145,ko00190,ko04966,ko04721	KOG2189(C)(Vacuolar H+-ATPase V0 sector, subunit a)	sp|Q9HBG4|VPP4_HUMAN;gnl|BL_ORD_ID|247795	sp|Q9HBG4|VPP4_HUMAN V-type proton ATPase 116 kDa subunit a isoform 4 OS=Homo sapiens GN=ATP6V0A4 PE=1 SV=2;sp|Q9HBG4|VPP4_HUMAN V-type proton ATPase 116 kDa subunit a isoform 4 OS=Homo sapiens GN=ATP6V0A4 PE=1 SV=2
ATP6V0D2	0.064458	0	0.0374265	0	0	0.045323	0.0170333	0	0.0170333	0.0334238	0.0170333	0	0.173186	0.403121	0.127105	0.064458	0.0863598	0.526339	PREDICTED: V-type proton ATPase subunit d 2 isoform X2 [Geospiza fortis];PREDICTED: V-type proton ATPase subunit d 2 [Chrysemys picta bellii]	GO:0033179;GO:0015078;GO:0015991	proton-transporting V-type ATPase, V0 domain;hydrogen ion transmembrane transporter activity;ATP hydrolysis coupled proton transport	K02146	ATPeV0D,ATP6D	http://www.genome.jp/dbget-bin/www_bget?ko:K02146	Lysosome;Phagosome;Oxidative phosphorylation;Collecting duct acid secretion;Synaptic vesicle cycle	ko04142,ko04145,ko00190,ko04966,ko04721	KOG2957(C)(Vacuolar H+-ATPase V0 sector, subunit d)	gnl|BL_ORD_ID|241003	sp|Q5ZHL0|VA0D2_CHICK V-type proton ATPase subunit d 2 OS=Gallus gallus GN=ATP6V0D2 PE=2 SV=1
ATP6V1G3	0	0.045323	0	0	0.0413927	0	0.20412	0.045323	0.0827854	0.0681859	0.045323	0	0.904716	0.474216	0.600973	0.367356	0.546543	1.37931	PREDICTED: V-type proton ATPase subunit G 3 [Pelodiscus sinensis]	GO:0016820;GO:0016471;GO:0015992	hydrolase activity, acting on acid anhydrides, catalyzing transmembrane movement of substances;vacuolar proton-transporting V-type ATPase complex;proton transport	K02152	ATPeV1G,ATP6G	http://www.genome.jp/dbget-bin/www_bget?ko:K02152	Phagosome;mTOR signaling pathway;Oxidative phosphorylation;Collecting duct acid secretion;Synaptic vesicle cycle	ko04145,ko04150,ko00190,ko04966,ko04721	KOG1772(C)(Vacuolar H+-ATPase V1 sector, subunit G)	gnl|BL_ORD_ID|243855	sp|Q96LB4|VATG3_HUMAN V-type proton ATPase subunit G 3 OS=Homo sapiens GN=ATP6V1G3 PE=2 SV=1
ATRN	0.929419	0.965672	0.950365	0.794488	0.847573	0.85309	1.15381	1.08171	1.07262	1.2408	1.13893	1.10175	0.886491	0.980458	0.847573	0.860937	0.890421	0.923244	PREDICTED: attractin [Pelodiscus sinensis];PREDICTED: attractin-like [Meleagris gallopavo]	-	-	-	-	-	-	-	KOG0994(W)(Extracellular matrix glycoprotein Laminin subunit beta)	sp|O75882|ATRN_HUMAN;gnl|BL_ORD_ID|294573	sp|O75882|ATRN_HUMAN Attractin OS=Homo sapiens GN=ATRN PE=1 SV=2;sp|O75882|ATRN_HUMAN Attractin OS=Homo sapiens GN=ATRN PE=1 SV=2
ATXN1	0.11059	0.071882	0.123852	0.0791812	0.149219	0.0569049	0.466868	0.38739	0.257679	0.439333	0.346353	0.545307	0.170262	0.212188	0.09691	0.10721	0.100371	0.278754	PREDICTED: ataxin-1 [Pelodiscus sinensis]<>XP_014435053.1 PREDICTED: ataxin-1 [Pelodiscus sinensis]<>XP_014435054.1 PREDICTED: ataxin-1 [Pelodiscus sinensis]<>XP_014435055.1 PREDICTED: ataxin-1 [Pelodiscus sinensis]<>XP_014435056.1 PREDICTED: ataxin-1 [Pelodiscus sinensis]<>XP_014435057.1 PREDICTED: ataxin-1 [Pelodiscus sinensis]<>XP_014435058.1 PREDICTED: ataxin-1 [Pelodiscus sinensis]	GO:0003723	RNA binding	-	-	-	-	-	-	gnl|BL_ORD_ID|301833;sp|Q63540|ATX1_RAT	sp|Q63540|ATX1_RAT Ataxin-1 OS=Rattus norvegicus GN=Atxn1 PE=2 SV=1;sp|Q63540|ATX1_RAT Ataxin-1 OS=Rattus norvegicus GN=Atxn1 PE=2 SV=1
ATXN7L2	0.64836	0.611723	0.721811	1.17202	1.04805	1.05918	0.658965	0.683947	0.775246	0.678518	0.79379	0.748188	0.71265	0.710963	0.804821	0.822168	0.71433	0.717671	PREDICTED: ataxin-7-like protein 2 [Pelodiscus sinensis]	-	-	K11318	ATXN7,SCA7	http://www.genome.jp/dbget-bin/www_bget?ko:K11318	-	-	KOG4140(B)(Nuclear protein Ataxin-7)	sp|Q5T6C5|AT7L2_HUMAN;gnl|BL_ORD_ID|290833	sp|Q5T6C5|AT7L2_HUMAN Ataxin-7-like protein 2 OS=Homo sapiens GN=ATXN7L2 PE=1 SV=1;sp|Q5T6C5|AT7L2_HUMAN Ataxin-7-like protein 2 OS=Homo sapiens GN=ATXN7L2 PE=1 SV=1
AURKA	1.37731	1.36436	1.42259	1.38382	1.27021	1.38328	1.25959	1.33806	1.23121	1.31048	1.197	1.28353	0.780317	0.79796	0.764923	0.676694	0.997386	0.904716	PREDICTED: aurora kinase A, partial [Pelodiscus sinensis]	-	-	K11481	AURKA	http://www.genome.jp/dbget-bin/www_bget?ko:K11481	Oocyte meiosis	ko04114	KOG0580(D)(Serine/threonine protein kinase)	sp|A5GFW1|AURKA_PIG;gnl|BL_ORD_ID|298191	sp|A5GFW1|AURKA_PIG Aurora kinase A OS=Sus scrofa GN=AURKA PE=3 SV=1;sp|A5GFW1|AURKA_PIG Aurora kinase A OS=Sus scrofa GN=AURKA PE=3 SV=1
AUTS2	1.22712	1.1959	1.19756	1.31197	1.13481	1.29181	1.02407	1.01578	1.14706	1.04961	1.07482	1.15076	0.78746	0.770115	0.795185	0.997386	0.873902	0.944976	PREDICTED: autism susceptibility gene 2 protein, partial [Python bivittatus];PREDICTED: autism susceptibility gene 2 protein isoform X1 [Chrysemys picta bellii];PREDICTED: autism susceptibility gene 2 protein [Pelodiscus sinensis]	-	-	-	-	-	-	-	-	sp|Q8WXX7|AUTS2_HUMAN;gnl|BL_ORD_ID|292631	sp|Q8WXX7|AUTS2_HUMAN Autism susceptibility gene 2 protein OS=Homo sapiens GN=AUTS2 PE=1 SV=1;sp|Q8WXX7|AUTS2_HUMAN Autism susceptibility gene 2 protein OS=Homo sapiens GN=AUTS2 PE=1 SV=1
AVL9	0.741939	0.748188	0.584331	0.582063	0.650308	0.445604	0.931966	0.875061	0.79379	0.980458	0.887054	0.834421	0.567026	0.879096	0.595496	0.611723	0.696356	0.657056	PREDICTED: late secretory pathway protein AVL9 homolog [Pelodiscus sinensis];PREDICTED: LOW QUALITY PROTEIN: late secretory pathway protein AVL9 homolog [Neolamprologus brichardi]	GO:0016477;GO:0055037	cell migration;recycling endosome	-	-	-	-	-	KOG3823(S)(Uncharacterized conserved protein)	gnl|BL_ORD_ID|293728;sp|Q8NBF6|AVL9_HUMAN	sp|Q8NBF6|AVL9_HUMAN Late secretory pathway protein AVL9 homolog OS=Homo sapiens GN=AVL9 PE=1 SV=1;sp|Q8NBF6|AVL9_HUMAN Late secretory pathway protein AVL9 homolog OS=Homo sapiens GN=AVL9 PE=1 SV=1
B3GALT1	0.423246	0.334454	0.307496	0.591065	0.62634	0.577492	0.697229	0.549003	0.609594	0.690196	0.474216	0.557507	0.255273	0.439333	0.136721	0.198657	0.305351	0.201397	PREDICTED: beta-1,3-galactosyltransferase 1 isoform X2 [Pelodiscus sinensis];PREDICTED: uncharacterized protein LOC102462188 isoform X2 [Pelodiscus sinensis];PREDICTED: beta-1,3-galactosyltransferase 1 isoform X1 [Pelodiscus sinensis]<>XP_006135831.1 PREDICTED: beta-1,3-galactosyltransferase 1 isoform X1 [Pelodiscus sinensis]<>XP_006135832.1 PREDICTED: beta-1,3-galactosyltransferase 1 isoform X1 …	GO:0006486;GO:0016740;GO:0016021;GO:0009312;GO:0016020;GO:0016757;GO:0008378;GO:0000139;GO:0008499;GO:0005794	protein glycosylation;transferase activity;integral component of membrane;oligosaccharide biosynthetic process;membrane;transferase activity, transferring glycosyl groups;galactosyltransferase activity;Golgi membrane;UDP-galactose:beta-N-acetylglucosamine beta-1,3-galactosyltransferase activity;Golgi apparatus	K13355;K07819	NUDT19;B3GALT1	http://www.genome.jp/dbget-bin/www_bget?ko:K13355;http://www.genome.jp/dbget-bin/www_bget?ko:K07819	Glycosphingolipid biosynthesis - lacto and neolacto series;Peroxisome	ko00601,ko04146	KOG2287(G)(Galactosyltransferases)	gnl|BL_ORD_ID|300553;sp|Q7JK24|B3GT1_GORGO;sp|Q9MYM7|B3GT1_PONPY;gnl|BL_ORD_ID|294640	sp|Q9MYM7|B3GT1_PONPY Beta-1,3-galactosyltransferase 1 OS=Pongo pygmaeus GN=B3GALT1 PE=3 SV=1;sp|Q7JK24|B3GT1_GORGO Beta-1,3-galactosyltransferase 1 OS=Gorilla gorilla gorilla GN=B3GALT1 PE=3 SV=1;sp|Q9MYM7|B3GT1_PONPY Beta-1,3-galactosyltransferase 1 OS=Pongo pygmaeus GN=B3GALT1 PE=3 SV=1;sp|O54904|B3GT1_MOUSE Beta-1,3-galactosyltransferase 1 OS=Mus musculus GN=B3galt1 PE=1 SV=2
B3GNT2	0.997386	0.947434	0.951338	0.631444	0.621176	0.728354	0.985426	0.961895	0.968483	0.990783	0.880814	1.05576	0.857935	0.970812	1.04532	0.947924	0.968483	1.08565	PREDICTED: N-acetyllactosaminide beta-1,3-N-acetylglucosaminyltransferase 2 [Pelodiscus sinensis]	GO:0016020;GO:0070062;GO:0006486;GO:0007608;GO:0016757;GO:0008378;GO:0007411;GO:0016740;GO:0000139;GO:0016021;GO:0030311;GO:0005794;GO:0008532	membrane;extracellular exosome;protein glycosylation;sensory perception of smell;transferase activity, transferring glycosyl groups;galactosyltransferase activity;axon guidance;transferase activity;Golgi membrane;integral component of membrane;poly-N-acetyllactosamine biosynthetic process;Golgi apparatus;N-acetyllactosaminide beta-1,3-N-acetylglucosaminyltransferase activity	K00741	B3GNT1,B3GNT2	http://www.genome.jp/dbget-bin/www_bget?ko:K00741	Glycosaminoglycan biosynthesis - keratan sulfate;Glycosphingolipid biosynthesis - lacto and neolacto series	ko00533,ko00601	KOG2287(G)(Galactosyltransferases)	gnl|BL_ORD_ID|303755;sp|Q9NY97|B3GN2_HUMAN	sp|Q9NY97|B3GN2_HUMAN N-acetyllactosaminide beta-1,3-N-acetylglucosaminyltransferase 2 OS=Homo sapiens GN=B3GNT2 PE=1 SV=2;sp|Q9NY97|B3GN2_HUMAN N-acetyllactosaminide beta-1,3-N-acetylglucosaminyltransferase 2 OS=Homo sapiens GN=B3GNT2 PE=1 SV=2
B3GNT7	0.369216	0.49276	0.768638	0.436163	0.434569	0.4133	0.428135	0.71433	0.643453	0.790285	0.460898	0.488551	1.32838	0.776701	0.846955	1.03141	1.10755	1.17231	PREDICTED: UDP-GlcNAc:betaGal beta-1,3-N-acetylglucosaminyltransferase 7 isoform X3 [Pelodiscus sinensis];PREDICTED: UDP-GlcNAc:betaGal beta-1,3-N-acetylglucosaminyltransferase 7 isoform X2 [Pelodiscus sinensis];PREDICTED: UDP-GlcNAc:betaGal beta-1,3-N-acetylglucosaminyltransferase 7 isoform X1 [Pelodiscus sinensis]	GO:0016020;GO:0006486;GO:0016757;GO:0008378;GO:0016740;GO:0000139;GO:0016021;GO:0005794	membrane;protein glycosylation;transferase activity, transferring glycosyl groups;galactosyltransferase activity;transferase activity;Golgi membrane;integral component of membrane;Golgi apparatus	K09664	B3GNT7	http://www.genome.jp/dbget-bin/www_bget?ko:K09664	Glycosaminoglycan biosynthesis - keratan sulfate	ko00533	KOG2287(G)(Galactosyltransferases)	sp|Q8NFL0|B3GN7_HUMAN;gnl|BL_ORD_ID|299715	sp|Q8NFL0|B3GN7_HUMAN UDP-GlcNAc:betaGal beta-1,3-N-acetylglucosaminyltransferase 7 OS=Homo sapiens GN=B3GNT7 PE=2 SV=1;sp|Q8NFL0|B3GN7_HUMAN UDP-GlcNAc:betaGal beta-1,3-N-acetylglucosaminyltransferase 7 OS=Homo sapiens GN=B3GNT7 PE=2 SV=1
B4GALNT2	0.1959	0.220108	0.847573	0.466868	0.507856	0.285557	0.44248	0.666518	0.592177	0.715167	0.706718	0.307496	1.2667	0.876218	0.440909	1.09377	0.975432	0.879096	PREDICTED: beta-1,4 N-acetylgalactosaminyltransferase 2 isoform X2 [Pelodiscus sinensis];PREDICTED: beta-1,4 N-acetylgalactosaminyltransferase 2 isoform X1 [Pelodiscus sinensis]	GO:0019276;GO:0006047;GO:0006486;GO:0016758;GO:0022408;GO:0030173;GO:0016021;GO:0016020;GO:0030259;GO:0008376	UDP-N-acetylgalactosamine metabolic process;UDP-N-acetylglucosamine metabolic process;protein glycosylation;transferase activity, transferring hexosyl groups;negative regulation of cell-cell adhesion;integral component of Golgi membrane;integral component of membrane;membrane;lipid glycosylation;acetylgalactosaminyltransferase activity	K09655	B4GALNT2	http://www.genome.jp/dbget-bin/www_bget?ko:K09655	-	-	-	sp|Q8NHY0|B4GN2_HUMAN;gnl|BL_ORD_ID|294647;sp|Q09199|B4GN2_MOUSE	sp|Q8NHY0|B4GN2_HUMAN Beta-1,4 N-acetylgalactosaminyltransferase 2 OS=Homo sapiens GN=B4GALNT2 PE=1 SV=2;sp|Q09199|B4GN2_MOUSE Beta-1,4 N-acetylgalactosaminyltransferase 2 OS=Mus musculus GN=B4galnt2 PE=2 SV=1;sp|Q09199|B4GN2_MOUSE Beta-1,4 N-acetylgalactosaminyltransferase 2 OS=Mus musculus GN=B4galnt2 PE=2 SV=1
B4GALNT4	0.802774	0.682145	0.757396	1.15045	1.10278	0.925828	0.854306	0.885926	0.910091	0.915927	0.950851	1.01536	0.439333	0.513218	0.553883	0.619093	0.745855	0.646404	PREDICTED: N-acetyl-beta-glucosaminyl-glycoprotein 4-beta-N-acetylgalactosaminyltransferase 1 [Pelodiscus sinensis]	-	-	K09657	B4GALNT4	http://www.genome.jp/dbget-bin/www_bget?ko:K09657	Various types of N-glycan biosynthesis	ko00513	KOG3588(G)(Chondroitin synthase 1)	gnl|BL_ORD_ID|299724;sp|Q766D5|B4GN4_MOUSE	sp|Q766D5|B4GN4_MOUSE N-acetyl-beta-glucosaminyl-glycoprotein 4-beta-N-acetylgalactosaminyltransferase 1 OS=Mus musculus GN=B4galnt4 PE=2 SV=1;sp|Q766D5|B4GN4_MOUSE N-acetyl-beta-glucosaminyl-glycoprotein 4-beta-N-acetylgalactosaminyltransferase 1 OS=Mus musculus GN=B4galnt4 PE=2 SV=1
BAAT	0.724276	0.52763	0.630428	0.495544	0.771587	0.489958	0.683947	0.731589	0.782473	0.854306	1.06483	0.619093	0.845098	1.0216	1.1878	0.864511	0.985875	0.990783	PREDICTED: bile acid-CoA:amino acid N-acyltransferase [Pelodiscus sinensis]	GO:0005102;GO:0006544;GO:0016746;GO:0002152;GO:0047963;GO:0052817;GO:0016740;GO:0052815;GO:0005777;GO:0005829;GO:0016790;GO:0006637;GO:0052816;GO:0016410;GO:0019530;GO:0006699	receptor binding;glycine metabolic process;transferase activity, transferring acyl groups;bile acid conjugation;glycine N-choloyltransferase activity;very long chain acyl-CoA hydrolase activity;transferase activity;medium-chain acyl-CoA hydrolase activity;peroxisome;cytosol;thiolester hydrolase activity;acyl-CoA metabolic process;long-chain acyl-CoA hydrolase activity;N-acyltransferase activity;t…	K00659	BAAT	http://www.genome.jp/dbget-bin/www_bget?ko:K00659	Peroxisome;Biosynthesis of unsaturated fatty acids;Primary bile acid biosynthesis;Taurine and hypotaurine metabolism;Bile secretion	ko04146,ko01040,ko00120,ko00430,ko04976	-	gnl|BL_ORD_ID|264776;sp|A2AKK5|ACNT1_MOUSE	sp|Q5FVR5|ACNT2_RAT Acyl-coenzyme A amino acid N-acyltransferase 2 OS=Rattus norvegicus GN=Acnat2 PE=2 SV=1;sp|A2AKK5|ACNT1_MOUSE Acyl-coenzyme A amino acid N-acyltransferase 1 OS=Mus musculus GN=Acnat1 PE=1 SV=1
BAG5	0.645422	0.777427	0.647383	0.561101	0.627366	0.604226	0.867467	0.844477	0.788875	0.92737	0.869232	0.888179	0.60206	0.742725	0.593286	0.535294	0.623249	0.574031	PREDICTED: BAG family molecular chaperone regulator 5 [Pelodiscus sinensis]<>XP_006116947.1 PREDICTED: BAG family molecular chaperone regulator 5 [Pelodiscus sinensis]	GO:0031625;GO:0051087;GO:0005739;GO:0007030;GO:0090083;GO:0032435;GO:0019901;GO:0048471;GO:0010977;GO:0005829;GO:0016020;GO:0016234;GO:0031397;GO:1902176;GO:0005634	ubiquitin protein ligase binding;chaperone binding;mitochondrion;Golgi organization;regulation of inclusion body assembly;negative regulation of proteasomal ubiquitin-dependent protein catabolic process;protein kinase binding;perinuclear region of cytoplasm;negative regulation of neuron projection development;cytosol;membrane;inclusion body;negative regulation of protein ubiquitination;negative r…	K09559	BAG5	http://www.genome.jp/dbget-bin/www_bget?ko:K09559	-	-	-	gnl|BL_ORD_ID|299750;sp|Q5F486|BAG5_CHICK	sp|Q5F486|BAG5_CHICK BAG family molecular chaperone regulator 5 OS=Gallus gallus GN=BAG5 PE=2 SV=1;sp|Q5F486|BAG5_CHICK BAG family molecular chaperone regulator 5 OS=Gallus gallus GN=BAG5 PE=2 SV=1
BAIAP2L1	0.502427	0.643453	0.577492	0.534026	0.544068	0.509203	0.79796	0.678518	0.608526	0.78746	0.704151	0.678518	0.843855	0.790988	0.835691	0.82866	0.790285	0.82866	PREDICTED: brain-specific angiogenesis inhibitor 1-associated protein 2-like protein 1 [Pelodiscus sinensis]	GO:0030833;GO:0005737;GO:0070062;GO:0005654;GO:0007009;GO:0005886;GO:2000251;GO:0009617;GO:0005829;GO:0015629;GO:0030838;GO:0070064;GO:0046626	regulation of actin filament polymerization;cytoplasm;extracellular exosome;nucleoplasm;plasma membrane organization;plasma membrane;positive regulation of actin cytoskeleton reorganization;response to bacterium;cytosol;actin cytoskeleton;positive regulation of actin filament polymerization;proline-rich region binding;regulation of insulin receptor signaling pathway	K20127	BAIAP2L	http://www.genome.jp/dbget-bin/www_bget?ko:K20127	-	-	-	sp|Q9UHR4|BI2L1_HUMAN;sp|Q3KR97|BI2L1_RAT;gnl|BL_ORD_ID|303345	sp|Q9UHR4|BI2L1_HUMAN Brain-specific angiogenesis inhibitor 1-associated protein 2-like protein 1 OS=Homo sapiens GN=BAIAP2L1 PE=1 SV=2;sp|Q3KR97|BI2L1_RAT Brain-specific angiogenesis inhibitor 1-associated protein 2-like protein 1 OS=Rattus norvegicus GN=Baiap2l1 PE=1 SV=1;sp|Q3KR97|BI2L1_RAT Brain-specific angiogenesis inhibitor 1-associated protein 2-like protein 1 OS=Rattus norvegicus GN=Baia…
BAIAP2L2	0.330414	0.457882	0.468347	0.49693	0.390935	0.494155	0.352183	0.20412	0.332438	0.262451	0.322219	0.230449	0.668386	0.557507	0.710117	0.562293	0.575188	0.599883	PREDICTED: brain-specific angiogenesis inhibitor 1-associated protein 2-like protein 2 [Pelodiscus sinensis]	-	-	K20127	BAIAP2L	http://www.genome.jp/dbget-bin/www_bget?ko:K20127	-	-	-	sp|Q80Y61|BI2L2_MOUSE;gnl|BL_ORD_ID|303002	sp|Q80Y61|BI2L2_MOUSE Brain-specific angiogenesis inhibitor 1-associated protein 2-like protein 2 OS=Mus musculus GN=Baiap2l2 PE=1 SV=1;sp|Q80Y61|BI2L2_MOUSE Brain-specific angiogenesis inhibitor 1-associated protein 2-like protein 2 OS=Mus musculus GN=Baiap2l2 PE=1 SV=1
BARD1	0.974972	0.960946	1.00346	0.924796	0.965202	0.974972	0.918555	0.940516	0.964731	0.963788	0.923244	0.96426	0.429752	0.352183	0.383815	0.38739	0.469822	0.591065	PREDICTED: BRCA1-associated RING domain protein 1 [Pelodiscus sinensis]	-	-	K10683	BARD1	http://www.genome.jp/dbget-bin/www_bget?ko:K10683	Homologous recombination	ko03440	KOG4177(M)(Ankyrin)	sp|Q99728|BARD1_HUMAN;gnl|BL_ORD_ID|302352	sp|Q99728|BARD1_HUMAN BRCA1-associated RING domain protein 1 OS=Homo sapiens GN=BARD1 PE=1 SV=2;sp|Q99728|BARD1_HUMAN BRCA1-associated RING domain protein 1 OS=Homo sapiens GN=BARD1 PE=1 SV=2
BBOX1	0.782473	0.802774	0.674861	0.444045	0.521138	0.612784	0.83123	0.83123	0.673021	0.810904	0.703291	0.853698	0.559907	0.684845	0.693727	0.647383	0.758912	0.710117	PREDICTED: gamma-butyrobetaine dioxygenase [Pelodiscus sinensis]<>XP_014429470.1 PREDICTED: gamma-butyrobetaine dioxygenase [Pelodiscus sinensis]	GO:0045329;GO:0070062;GO:0051213;GO:0008336;GO:0005506;GO:0055114;GO:0008270;GO:0005739;GO:0016491	carnitine biosynthetic process;extracellular exosome;dioxygenase activity;gamma-butyrobetaine dioxygenase activity;iron ion binding;oxidation-reduction process;zinc ion binding;mitochondrion;oxidoreductase activity	K00471	E1.14.11.1	http://www.genome.jp/dbget-bin/www_bget?ko:K00471	Lysine degradation	ko00310	-	gnl|BL_ORD_ID|305587;sp|Q9QZU7|BODG_RAT	sp|Q924Y0|BODG_MOUSE Gamma-butyrobetaine dioxygenase OS=Mus musculus GN=Bbox1 PE=1 SV=1;sp|Q9QZU7|BODG_RAT Gamma-butyrobetaine dioxygenase OS=Rattus norvegicus GN=Bbox1 PE=1 SV=1
BBS10	0.850646	1.02036	0.866878	0.775974	0.682145	0.832509	0.79588	0.833147	0.892095	0.846337	0.728354	0.819544	0.786751	0.935507	0.883661	0.794488	0.884229	0.858537	PREDICTED: Bardet-Biedl syndrome 10 protein [Pelodiscus sinensis]	GO:0005737;GO:0045494;GO:0005524;GO:0001103;GO:0001895;GO:0000166;GO:0043254;GO:0051131	cytoplasm;photoreceptor cell maintenance;ATP binding;RNA polymerase II repressing transcription factor binding;retina homeostasis;nucleotide binding;regulation of protein complex assembly;chaperone-mediated protein complex assembly	K19401	BBS10	http://www.genome.jp/dbget-bin/www_bget?ko:K19401	-	-	-	sp|Q5R8P3|BBS10_PONAB;gnl|BL_ORD_ID|304209	sp|Q5R8P3|BBS10_PONAB Bardet-Biedl syndrome 10 protein homolog OS=Pongo abelii GN=BBS10 PE=2 SV=1;sp|Q5R8P3|BBS10_PONAB Bardet-Biedl syndrome 10 protein homolog OS=Pongo abelii GN=BBS10 PE=2 SV=1
BBX	0.646404	0.759668	0.85309	0.276462	0.243038	0.230449	0.447158	0.389166	0.374748	0.570543	0.453318	0.503791	0.262451	0.396199	0.320146	0.305351	0.30963	0.313867	PREDICTED: HMG box transcription factor BBX [Pelodiscus sinensis]	-	-	-	-	-	-	-	KOG0527(K)(HMG-box transcription factor);KOG2746(K)(HMG-box transcription factor Capicua and related proteins)	sp|Q8VBW5|BBX_MOUSE;sp|Q8WY36|BBX_HUMAN;gnl|BL_ORD_ID|299782	sp|Q8VBW5|BBX_MOUSE HMG box transcription factor BBX OS=Mus musculus GN=Bbx PE=1 SV=2;sp|Q8WY36|BBX_HUMAN HMG box transcription factor BBX OS=Homo sapiens GN=BBX PE=1 SV=1;sp|Q8VBW5|BBX_MOUSE HMG box transcription factor BBX OS=Mus musculus GN=Bbx PE=1 SV=2
BCAS1	0.451786	0.445604	0.699838	0.403121	0.4843	0.453318	0.541579	0.50515	0.469822	0.564666	0.346353	0.463893	0.74351	0.518514	0.576341	0.783904	0.683047	0.60206	PREDICTED: breast carcinoma-amplified sequence 1 isoform X7 [Pelodiscus sinensis];PREDICTED: breast carcinoma-amplified sequence 1 isoform X1 [Pelodiscus sinensis]<>XP_014432199.1 PREDICTED: breast carcinoma-amplified sequence 1 isoform X2 [Pelodiscus sinensis]<>XP_014432200.1 PREDICTED: breast carcinoma-amplified sequence 1 isoform X1 [Pelodiscus sinensis];PREDICTED: breast carcinoma-amplified s…	GO:0070062	extracellular exosome	-	-	-	-	-	-	gnl|BL_ORD_ID|304218;sp|O75363|BCAS1_HUMAN;sp|Q80YN3|BCAS1_MOUSE;gnl|BL_ORD_ID|300636	sp|O75363|BCAS1_HUMAN Breast carcinoma-amplified sequence 1 OS=Homo sapiens GN=BCAS1 PE=1 SV=2;sp|O75363|BCAS1_HUMAN Breast carcinoma-amplified sequence 1 OS=Homo sapiens GN=BCAS1 PE=1 SV=2;sp|Q80YN3|BCAS1_MOUSE Breast carcinoma-amplified sequence 1 homolog OS=Mus musculus GN=Bcas1 PE=1 SV=3;sp|Q80YN3|BCAS1_MOUSE Breast carcinoma-amplified sequence 1 homolog OS=Mus musculus GN=Bcas1 PE=1 SV=3
BCO1	0.255273	0.25042	0.184691	0.113943	0.1959	0.09691	0.456366	0.240549	0.269513	0.774517	0.267172	0.439333	0.193125	0.431364	0.330414	0.232996	0.20412	0.378398	PREDICTED: beta,beta-carotene 15,15'-monooxygenase isoform X2 [Pelodiscus sinensis]<>XP_014428908.1 PREDICTED: beta,beta-carotene 15,15'-monooxygenase isoform X2 [Pelodiscus sinensis]<>XP_014428909.1 PREDICTED: beta,beta-carotene 15,15'-monooxygenase isoform X2 [Pelodiscus sinensis]<>XP_014428910.1 PREDICTED: beta,beta-carotene 15,15'-monooxygenase isoform X2 [Pelodiscus sinensis];PREDICTED: beta…	GO:1901810;GO:0016702;GO:0055114;GO:0001523;GO:0042574;GO:0003834	beta-carotene metabolic process;oxidoreductase activity, acting on single donors with incorporation of molecular oxygen, incorporation of two atoms of oxygen;oxidation-reduction process;retinoid metabolic process;retinal metabolic process;beta-carotene 15,15'-monooxygenase activity	K00515	BCMO1,BCDO1	http://www.genome.jp/dbget-bin/www_bget?ko:K00515	Retinol metabolism	ko00830	-	sp|Q9I993|BCDO1_CHICK;gnl|BL_ORD_ID|301344	sp|Q9I993|BCDO1_CHICK Beta,beta-carotene 15,15'-dioxygenase OS=Gallus gallus GN=BCO1 PE=1 SV=1;sp|Q9I993|BCDO1_CHICK Beta,beta-carotene 15,15'-dioxygenase OS=Gallus gallus GN=BCO1 PE=1 SV=1
BCORL1	0.976808	0.798651	1.09447	1.33686	1.2307	1.26411	0.849419	0.861534	0.902003	0.766413	0.899273	0.777427	0.996512	0.847573	0.887617	1.0976	1.08814	0.896526	PREDICTED: LOW QUALITY PROTEIN: BCL-6 corepressor-like protein 1, partial [Pelodiscus sinensis]	-	-	-	-	-	-	-	-	sp|Q5H9F3|BCORL_HUMAN;gnl|BL_ORD_ID|308615	sp|Q5H9F3|BCORL_HUMAN BCL-6 corepressor-like protein 1 OS=Homo sapiens GN=BCORL1 PE=1 SV=1;sp|Q5H9F3|BCORL_HUMAN BCL-6 corepressor-like protein 1 OS=Homo sapiens GN=BCORL1 PE=1 SV=1
BCR	0.599883	0.448706	0.292256	0.41162	0.385606	0.361728	0.822822	0.710963	0.564666	0.559907	0.52763	0.660865	0.434569	0.383815	0.440909	0.326336	0.298853	0.352183	PREDICTED: LOW QUALITY PROTEIN: breakpoint cluster region protein [Pelodiscus sinensis]	-	-	K08878	BCR1,BCR	http://www.genome.jp/dbget-bin/www_bget?ko:K08878	-	-	KOG1453(T)(Chimaerin and related Rho GTPase activating proteins)	sp|P11274|BCR_HUMAN;gnl|BL_ORD_ID|308222	sp|P11274|BCR_HUMAN Breakpoint cluster region protein OS=Homo sapiens GN=BCR PE=1 SV=2;sp|P11274|BCR_HUMAN Breakpoint cluster region protein OS=Homo sapiens GN=BCR PE=1 SV=2
BDH1	1.23528	0.968483	1.10755	1.35622	1.29048	1.20817	1.2284	1.13066	1.08207	1.08565	1.17377	1.07372	0.695482	0.713491	0.568202	0.745855	0.751279	0.936514	PREDICTED: D-beta-hydroxybutyrate dehydrogenase, mitochondrial [Pelodiscus sinensis]	GO:0005737;GO:0005654;GO:0005743;GO:0005739;GO:0016491;GO:0003858	cytoplasm;nucleoplasm;mitochondrial inner membrane;mitochondrion;oxidoreductase activity;3-hydroxybutyrate dehydrogenase activity	K00019	E1.1.1.30,bdh	http://www.genome.jp/dbget-bin/www_bget?ko:K00019	Butanoate metabolism;Synthesis and degradation of ketone bodies	ko00650,ko00072	KOG1610(QR)(Corticosteroid 11-beta-dehydrogenase and related short chain-type dehydrogenases)	sp|Q80XN0|BDH_MOUSE;gnl|BL_ORD_ID|301148;sp|Q5ZJZ5|BDH_CHICK	sp|Q80XN0|BDH_MOUSE D-beta-hydroxybutyrate dehydrogenase, mitochondrial OS=Mus musculus GN=Bdh1 PE=1 SV=2;sp|Q5ZJZ5|BDH_CHICK D-beta-hydroxybutyrate dehydrogenase, mitochondrial OS=Gallus gallus GN=BDH1 PE=2 SV=1;sp|Q5ZJZ5|BDH_CHICK D-beta-hydroxybutyrate dehydrogenase, mitochondrial OS=Gallus gallus GN=BDH1 PE=2 SV=1
BLM	1.04376	1.05461	0.922206	0.999565	0.843233	0.898176	0.686636	0.89487	0.912753	0.786041	0.727541	0.814248	0.30963	0.385606	0.32838	0.344392	0.453318	0.454845	PREDICTED: Bloom syndrome protein isoform X1 [Pelodiscus sinensis];PREDICTED: Bloom syndrome protein isoform X2 [Pelodiscus sinensis]	-	-	K10901	BLM,RECQL3,SGS1	http://www.genome.jp/dbget-bin/www_bget?ko:K10901	Fanconi anemia pathway;Homologous recombination	ko03460,ko03440	KOG0351(L)(ATP-dependent DNA helicase)	gnl|BL_ORD_ID|311842;sp|Q9I920|BLM_CHICK	sp|Q9I920|BLM_CHICK Bloom syndrome protein homolog (Fragment) OS=Gallus gallus GN=BLM PE=2 SV=1;sp|Q9I920|BLM_CHICK Bloom syndrome protein homolog (Fragment) OS=Gallus gallus GN=BLM PE=2 SV=1
BLNK	0.517196	0.60206	0.544068	0.334454	0.444045	0.489958	0.570543	0.557507	0.608526	0.673942	0.518514	0.617	0.828015	0.983626	0.744293	0.802774	0.790285	0.665581	PREDICTED: B-cell linker protein isoform X2 [Pelodiscus sinensis];PREDICTED: B-cell linker protein isoform X1 [Pelodiscus sinensis];PREDICTED: B-cell linker protein isoform X4 [Pelodiscus sinensis];PREDICTED: B-cell linker protein isoform X6 [Pelodiscus sinensis];PREDICTED: B-cell linker protein isoform X3 [Pelodiscus sinensis];PREDICTED: B-cell linker protein isoform X5 [Pelodiscus sinensis]	-	-	K07371	BLNK	http://www.genome.jp/dbget-bin/www_bget?ko:K07371	NF-kappa B signaling pathway;Osteoclast differentiation;B cell receptor signaling pathway	ko04064,ko04380,ko04662	-	gnl|BL_ORD_ID|311843;sp|Q9YGC1|BLNK_CHICK	sp|Q9YGC1|BLNK_CHICK B-cell linker protein OS=Gallus gallus GN=BLNK PE=1 SV=1;sp|Q9YGC1|BLNK_CHICK B-cell linker protein OS=Gallus gallus GN=BLNK PE=1 SV=1
BMP7	0.444045	0.357935	0.357935	0.501059	0.450249	0.450249	0.471292	0.469822	0.440909	0.4843	0.416641	0.485721	0.11059	0.071882	0.158362	0.136721	0.152288	0.075547	PREDICTED: bone morphogenetic protein 7 [Pelodiscus sinensis]	GO:0008083;GO:0070700;GO:0008285;GO:0048754;GO:0030509;GO:0010800;GO:1900106;GO:0060445;GO:0045893;GO:0035239;GO:0001707;GO:0072125;GO:0001656;GO:0060687;GO:0045665;GO:0060548;GO:0030855;GO:0005576;GO:0005615;GO:0005160;GO:0005125	growth factor activity;BMP receptor binding;negative regulation of cell proliferation;branching morphogenesis of an epithelial tube;BMP signaling pathway;positive regulation of peptidyl-threonine phosphorylation;positive regulation of hyaluranon cable assembly;branching involved in salivary gland morphogenesis;positive regulation of transcription, DNA-templated;tube morphogenesis;mesoderm formati…	K16621	BMP7	http://www.genome.jp/dbget-bin/www_bget?ko:K16621	Hippo signaling pathway;TGF-beta signaling pathway;Cytokine-cytokine receptor interaction;Axon guidance	ko04390,ko04350,ko04060,ko04360	KOG3900(T)(Transforming growth factor beta, bone morphogenetic protein and related proteins)	gnl|BL_ORD_ID|303530;sp|P23359|BMP7_MOUSE	sp|P23359|BMP7_MOUSE Bone morphogenetic protein 7 OS=Mus musculus GN=Bmp7 PE=1 SV=2;sp|P23359|BMP7_MOUSE Bone morphogenetic protein 7 OS=Mus musculus GN=Bmp7 PE=1 SV=2
BMPR1A	0.838849	0.846955	0.781755	0.83123	0.786751	0.737193	1.04258	1.01157	0.981366	1.09307	1.02979	1.08884	0.663701	0.719331	0.618048	0.727541	0.672098	0.730782	PREDICTED: LOW QUALITY PROTEIN: bone morphogenetic protein receptor type-1A [Pelodiscus sinensis]	GO:0016020;GO:0009897;GO:0004672;GO:0004702;GO:0007492;GO:0009953;GO:0002053;GO:0030509;GO:0007178;GO:2000772;GO:0048598;GO:0005524;GO:0005901;GO:0000166;GO:0005886;GO:0042803;GO:0004674;GO:0060896;GO:0046332;GO:0004675;GO:0016310;GO:0003272;GO:0007389;GO:0016301;GO:0006468;GO:0016740;GO:0016021;GO:0044214;GO:0001948	membrane;external side of plasma membrane;protein kinase activity;signal transducer, downstream of receptor, with serine/threonine kinase activity;endoderm development;dorsal/ventral pattern formation;positive regulation of mesenchymal cell proliferation;BMP signaling pathway;transmembrane receptor protein serine/threonine kinase signaling pathway;regulation of cellular senescence;embryonic morph…	K04673	BMPR1A,ALK3	http://www.genome.jp/dbget-bin/www_bget?ko:K04673	Signaling pathways regulating pluripotency of stem cells;Hippo signaling pathway;TGF-beta signaling pathway;Cytokine-cytokine receptor interaction	ko04550,ko04390,ko04350,ko04060	KOG2052(T)(Activin A type IB receptor, serine/threonine protein kinase)	sp|P36894|BMR1A_HUMAN;gnl|BL_ORD_ID|305575	sp|P36894|BMR1A_HUMAN Bone morphogenetic protein receptor type-1A OS=Homo sapiens GN=BMPR1A PE=1 SV=2;sp|P36895|BMR1A_MOUSE Bone morphogenetic protein receptor type-1A OS=Mus musculus GN=Bmpr1a PE=2 SV=1
BMPR2	0.448706	0.290035	0.238046	0.40654	0.481443	0.40824	0.892651	0.825426	0.665581	0.832509	0.821514	0.987666	0.421604	0.487138	0.481443	0.348305	0.457882	0.49276	PREDICTED: bone morphogenetic protein receptor type-2 isoform X1 [Pelodiscus sinensis];PREDICTED: bone morphogenetic protein receptor type-2 isoform X2 [Pelodiscus sinensis]	GO:0004672;GO:0003085;GO:0030509;GO:0005524;GO:0060350;GO:0005886;GO:0004674;GO:0048010;GO:0016310;GO:0009267;GO:0016301;GO:0016740;GO:0014916;GO:0016021;GO:0016020;GO:0005887;GO:0048842;GO:0004702;GO:0030166;GO:0045944;GO:0005901;GO:0000166;GO:0004675;GO:0005615;GO:0036122;GO:0009986	protein kinase activity;negative regulation of systemic arterial blood pressure;BMP signaling pathway;ATP binding;endochondral bone morphogenesis;plasma membrane;protein serine/threonine kinase activity;vascular endothelial growth factor receptor signaling pathway;phosphorylation;cellular response to starvation;kinase activity;transferase activity;regulation of lung blood pressure;integral compon…	K04671	BMPR2	http://www.genome.jp/dbget-bin/www_bget?ko:K04671	Signaling pathways regulating pluripotency of stem cells;Hippo signaling pathway;TGF-beta signaling pathway;Cytokine-cytokine receptor interaction;Axon guidance	ko04550,ko04390,ko04350,ko04060,ko04360	KOG2052(T)(Activin A type IB receptor, serine/threonine protein kinase)	sp|Q13873|BMPR2_HUMAN;gnl|BL_ORD_ID|311227	sp|Q13873|BMPR2_HUMAN Bone morphogenetic protein receptor type-2 OS=Homo sapiens GN=BMPR2 PE=1 SV=2;sp|O35607|BMPR2_MOUSE Bone morphogenetic protein receptor type-2 OS=Mus musculus GN=Bmpr2 PE=1 SV=1
BOC	1.04376	0.816904	1.00087	1.50678	1.40466	1.19479	1.23096	1.18639	1.12483	1.1529	1.34967	1.34084	0.675778	0.611723	0.650308	0.907949	0.863323	0.868056	Brother of CDO [Chelonia mydas];PREDICTED: brother of CDO [Pelodiscus sinensis]	-	-	K20020	BOC	http://www.genome.jp/dbget-bin/www_bget?ko:K20020	Hedgehog signaling pathway;Axon guidance	ko04340,ko04360	KOG0613(Z)(Projectin/twitchin and related proteins);KOG4221(T)(Receptor mediating netrin-dependent axon guidance)	gnl|BL_ORD_ID|308464;sp|Q6AZB0|BOC_MOUSE;sp|Q9BWV1|BOC_HUMAN	sp|Q9BWV1|BOC_HUMAN Brother of CDO OS=Homo sapiens GN=BOC PE=1 SV=1;sp|Q6AZB0|BOC_MOUSE Brother of CDO OS=Mus musculus GN=Boc PE=1 SV=2;sp|Q9BWV1|BOC_HUMAN Brother of CDO OS=Homo sapiens GN=BOC PE=1 SV=1
BOD1L1	0.983626	1.05652	1.08565	0.658011	0.636488	0.580925	0.838849	0.832509	0.814248	0.854306	0.873902	0.868644	0.523746	0.585461	0.466868	0.5302	0.540329	0.544068	PREDICTED: biorientation of chromosomes in cell division protein 1-like 1 [Pelodiscus sinensis]	-	-	-	-	-	-	-	-	sp|Q8NFC6|BD1L1_HUMAN;gnl|BL_ORD_ID|304238	sp|Q8NFC6|BD1L1_HUMAN Biorientation of chromosomes in cell division protein 1-like 1 OS=Homo sapiens GN=BOD1L1 PE=1 SV=2;sp|Q8NFC6|BD1L1_HUMAN Biorientation of chromosomes in cell division protein 1-like 1 OS=Homo sapiens GN=BOD1L1 PE=1 SV=2
BPIFC	0.0211893	0.123852	0.0569049	0	0.0530784	0	0.049218	0.11059	0.0863598	0.133539	0.0827854	0	0.212188	0.264818	0.401401	0.372912	0.281033	0.178977	PREDICTED: BPI fold-containing family C protein [Pelodiscus sinensis]	GO:0005615;GO:0008289	extracellular space;lipid binding	K14415	RTCB,rtcB	http://www.genome.jp/dbget-bin/www_bget?ko:K14415	-	-	-	gnl|BL_ORD_ID|305049;sp|Q8NFQ6|BPIFC_HUMAN	sp|Q8NFQ6|BPIFC_HUMAN BPI fold-containing family C protein OS=Homo sapiens GN=BPIFC PE=2 SV=1;sp|Q8NFQ6|BPIFC_HUMAN BPI fold-containing family C protein OS=Homo sapiens GN=BPIFC PE=2 SV=1
BRAF	0.357935	0.41162	0.292256	0.285557	0.225309	0.255273	0.523746	0.513218	0.426511	0.611723	0.680336	0.591065	0.222716	0.311754	0.281033	0.33646	0.296665	0.361728	PREDICTED: serine/threonine-protein kinase B-raf isoform X2 [Pelodiscus sinensis];PREDICTED: serine/threonine-protein kinase B-raf isoform X1 [Pelodiscus sinensis];PREDICTED: serine/threonine-protein kinase B-raf isoform X7 [Meleagris gallopavo]	GO:0031434;GO:0005737;GO:0030878;GO:0004672;GO:0042802;GO:0005622;GO:0043005;GO:0015758;GO:0033138;GO:0005524;GO:1900026;GO:0060291;GO:0005739;GO:0005886;GO:0004709;GO:0000165;GO:0010764;GO:0043367;GO:0004674;GO:0005509;GO:0016310;GO:0042127;GO:0045580;GO:0035019;GO:0002318;GO:0016301;GO:0043524;GO:0050772;GO:0010628;GO:0007275;GO:0090150;GO:0016740;GO:0008542;GO:0043369;GO:0048538;GO:0051496;GO:…	mitogen-activated protein kinase kinase binding;cytoplasm;thyroid gland development;protein kinase activity;identical protein binding;intracellular;neuron projection;glucose transport;positive regulation of peptidyl-serine phosphorylation;ATP binding;positive regulation of substrate adhesion-dependent cell spreading;long-term synaptic potentiation;mitochondrion;plasma membrane;MAP kinase kinase k…	K04365	BRAF	http://www.genome.jp/dbget-bin/www_bget?ko:K04365	Apoptosis - fly;Regulation of actin cytoskeleton;Focal adhesion;ErbB signaling pathway;FoxO signaling pathway;MAPK signaling pathway;MAPK signaling pathway - fly;Rap1 signaling pathway;cAMP signaling pathway;mTOR signaling pathway;Vascular smooth muscle contraction;Dorso-ventral axis formation;Insulin signaling pathway;Progesterone-mediated oocyte maturation;Chemokine signaling pathway;Natural ki…	ko04214,ko04810,ko04510,ko04012,ko04068,ko04010,ko04013,ko04015,ko04024,ko04150,ko04270,ko04320,ko04910,ko04914,ko04062,ko04650,ko04730,ko04720,ko04722,ko04726	KOG0193(T)(Serine/threonine protein kinase RAF)	gnl|BL_ORD_ID|304092;sp|P34908|BRAF_COTJA;sp|Q04982|BRAF_CHICK;gnl|BL_ORD_ID|309551;sp|P15056|BRAF_HUMAN	sp|P15056|BRAF_HUMAN Serine/threonine-protein kinase B-raf OS=Homo sapiens GN=BRAF PE=1 SV=4;sp|P34908|BRAF_COTJA Serine/threonine-protein kinase B-raf OS=Coturnix coturnix japonica GN=BRAF PE=2 SV=1;sp|Q04982|BRAF_CHICK Serine/threonine-protein kinase B-raf OS=Gallus gallus GN=BRAF PE=1 SV=1;sp|P34908|BRAF_COTJA Serine/threonine-protein kinase B-raf OS=Coturnix coturnix japonica GN=BRAF PE=2 SV=…
BRAP	1.03663	1.17202	0.853698	0.826075	0.673942	0.744293	1.12872	1.14333	0.933993	0.801404	0.914343	0.873321	0.991226	1.15655	0.970347	0.762679	0.751279	0.776701	PREDICTED: BRCA1-associated protein [Pelodiscus sinensis]	GO:0005737;GO:0031965;GO:0042802;GO:0000165;GO:0043130;GO:0061630;GO:0008139;GO:0016567;GO:0005829;GO:0009968;GO:0000151;GO:0000166;GO:0004842;GO:0003676;GO:0007265;GO:0005515;GO:0008270	cytoplasm;nuclear membrane;identical protein binding;MAPK cascade;ubiquitin binding;ubiquitin protein ligase activity;nuclear localization sequence binding;protein ubiquitination;cytosol;negative regulation of signal transduction;ubiquitin ligase complex;nucleotide binding;ubiquitin-protein transferase activity;nucleic acid binding;Ras protein signal transduction;protein binding;zinc ion binding	K10632	BRAP	http://www.genome.jp/dbget-bin/www_bget?ko:K10632	Ras signaling pathway	ko04014	KOG0944(O)(Ubiquitin-specific protease UBP14)	sp|Q7Z569|BRAP_HUMAN;gnl|BL_ORD_ID|307678	sp|Q7Z569|BRAP_HUMAN BRCA1-associated protein OS=Homo sapiens GN=BRAP PE=1 SV=2;sp|Q7Z569|BRAP_HUMAN BRCA1-associated protein OS=Homo sapiens GN=BRAP PE=1 SV=2
BRD9	1.23274	1.39023	1.35334	1.1486	0.975432	1.16017	1.14489	1.12024	1.17406	1.15715	1.09656	1.18041	0.989005	0.896526	0.969882	0.909556	1.0569	0.985426	PREDICTED: bromodomain-containing protein 9 [Chelonia mydas];PREDICTED: bromodomain-containing protein 9 isoform X2 [Chrysemys picta bellii];PREDICTED: bromodomain-containing protein 9 [Pelodiscus sinensis]	-	-	K11723	BRD7_9	http://www.genome.jp/dbget-bin/www_bget?ko:K11723	-	-	KOG1472(BK)(Histone acetyltransferase SAGA/ADA, catalytic subunit PCAF/GCN5 and related proteins);KOG0955(R)(PHD finger protein BR140/LIN-49)	sp|Q9H8M2|BRD9_HUMAN;gnl|BL_ORD_ID|305638	sp|Q9H8M2|BRD9_HUMAN Bromodomain-containing protein 9 OS=Homo sapiens GN=BRD9 PE=1 SV=2;sp|Q9H8M2|BRD9_HUMAN Bromodomain-containing protein 9 OS=Homo sapiens GN=BRD9 PE=1 SV=2
BRINP2	0.075547	0.0293838	0.0211893	0.352183	0.283301	0.283301	0.045323	0.113943	0.173186	0.164353	0.20412	0.1959	0.0413927	0.0791812	0.0530784	0.0791812	0.164353	0.173186	PREDICTED: LOW QUALITY PROTEIN: BMP/retinoic acid-inducible neural-specific protein 2 [Pelodiscus sinensis]	GO:0030425;GO:0007399;GO:0045666;GO:0043025;GO:0045930;GO:0071300;GO:0003674;GO:0005576;GO:0005783;GO:0045786;GO:0007050;GO:0007049	dendrite;nervous system development;positive regulation of neuron differentiation;neuronal cell body;negative regulation of mitotic cell cycle;cellular response to retinoic acid;molecular_function;extracellular region;endoplasmic reticulum;negative regulation of cell cycle;cell cycle arrest;cell cycle	-	-	-	-	-	-	gnl|BL_ORD_ID|307145;sp|Q5RDR5|BRNP2_PONAB	sp|Q5RDR5|BRNP2_PONAB BMP/retinoic acid-inducible neural-specific protein 2 OS=Pongo abelii GN=BRINP2 PE=2 SV=1;sp|Q5RDR5|BRNP2_PONAB BMP/retinoic acid-inducible neural-specific protein 2 OS=Pongo abelii GN=BRINP2 PE=2 SV=1
BUB1	1.18724	1.26126	1.26482	1.1209	1.0465	1.09587	0.968483	0.97359	0.977724	0.964731	0.923244	1.04766	0.521138	0.558709	0.5302	0.49276	0.612784	0.640481	PREDICTED: mitotic checkpoint serine/threonine-protein kinase BUB1 [Pelodiscus sinensis]	-	-	K02178	BUB1	http://www.genome.jp/dbget-bin/www_bget?ko:K02178	Cell cycle;Cell cycle - yeast;Meiosis - yeast;Oocyte meiosis;Progesterone-mediated oocyte maturation	ko04110,ko04111,ko04113,ko04114,ko04914	KOG0032(T)(Ca2+/calmodulin-dependent protein kinase, EF-Hand protein superfamily);KOG1166(D)(Mitotic checkpoint serine/threonine protein kinase)	gnl|BL_ORD_ID|307219;sp|O43683|BUB1_HUMAN	sp|O43683|BUB1_HUMAN Mitotic checkpoint serine/threonine-protein kinase BUB1 OS=Homo sapiens GN=BUB1 PE=1 SV=1;sp|O43683|BUB1_HUMAN Mitotic checkpoint serine/threonine-protein kinase BUB1 OS=Homo sapiens GN=BUB1 PE=1 SV=1
BUB1B	1.3483	1.35813	1.36342	1.27761	1.12483	1.14208	0.992554	1.06145	1.15259	1.09656	1.07115	1.12548	0.625312	0.609594	0.702431	0.62634	0.878522	0.748188	Mitotic checkpoint serine/threonine-protein kinase BUB1 beta, partial [Chelonia mydas];PREDICTED: mitotic checkpoint serine/threonine-protein kinase BUB1 beta isoform X1 [Pelodiscus sinensis];PREDICTED: mitotic checkpoint serine/threonine-protein kinase BUB1 beta isoform X2 [Pelodiscus sinensis]	-	-	K06637	BUB1B,BUBR1,MAD3L	http://www.genome.jp/dbget-bin/www_bget?ko:K06637	Cell cycle	ko04110	KOG1166(D)(Mitotic checkpoint serine/threonine protein kinase)	sp|O60566|BUB1B_HUMAN;gnl|BL_ORD_ID|307090	sp|O60566|BUB1B_HUMAN Mitotic checkpoint serine/threonine-protein kinase BUB1 beta OS=Homo sapiens GN=BUB1B PE=1 SV=3;sp|O60566|BUB1B_HUMAN Mitotic checkpoint serine/threonine-protein kinase BUB1 beta OS=Homo sapiens GN=BUB1B PE=1 SV=3
BZRAP1	0.187521	0.045323	0.133539	0.462398	0.44248	0.488551	0.267172	0.209515	0.247973	0.193125	0.167317	0.255273	0.247973	0.155336	0.09691	0.356026	0.318063	0.212188	PREDICTED: peripheral-type benzodiazepine receptor-associated protein 1 isoform X11 [Chrysemys picta bellii];PREDICTED: LOW QUALITY PROTEIN: peripheral-type benzodiazepine receptor-associated protein 1 [Pelodiscus sinensis]	-	-	K19922	BZRAP1,RIMBP1	http://www.genome.jp/dbget-bin/www_bget?ko:K19922	-	-	KOG3632(TZ)(Peripheral benzodiazepine receptor PRAX-1)	gnl|BL_ORD_ID|443337;sp|O95153|RIMB1_HUMAN;sp|O15034|RIMB2_HUMAN	sp|Q8QFX1|RIMB2_CHICK RIMS-binding protein 2 OS=Gallus gallus GN=RIMBP2 PE=1 SV=1;sp|O95153|RIMB1_HUMAN Peripheral-type benzodiazepine receptor-associated protein 1 OS=Homo sapiens GN=TSPOAP1 PE=1 SV=2;sp|O15034|RIMB2_HUMAN RIMS-binding protein 2 OS=Homo sapiens GN=RIMBP2 PE=1 SV=3
C1GALT1C1	0.881385	0.927883	0.89487	0.771587	0.824776	0.812245	1.01326	1.00732	1.00561	1.031	0.961895	0.879096	1.03862	1.14426	1.07115	1.05115	1.00647	1.07664	PREDICTED: C1GALT1-specific chaperone 1 [Pelodiscus sinensis]	GO:0030168;GO:0006493;GO:0036344	platelet activation;protein O-linked glycosylation;platelet morphogenesis	K09653	C1GALT2,C1GALT1C1	http://www.genome.jp/dbget-bin/www_bget?ko:K09653	Mucin type O-glycan biosynthesis	ko00512	KOG2246(G)(Galactosyltransferases)	sp|Q3SX46|C1GLC_BOVIN;gnl|BL_ORD_ID|312977	sp|Q3SX46|C1GLC_BOVIN C1GALT1-specific chaperone 1 OS=Bos taurus GN=C1GALT1C1 PE=2 SV=1;sp|Q3SX46|C1GLC_BOVIN C1GALT1-specific chaperone 1 OS=Bos taurus GN=C1GALT1C1 PE=2 SV=1
C1QTNF2	0.498311	0.311754	0.431364	0.683047	0.656098	0.528917	0.851258	0.89098	0.698101	0.834421	0.737193	1.05576	0.127105	0.064458	0.123852	0.173186	0.243038	0.139879	PREDICTED: complement C1q tumor necrosis factor-related protein 2 isoform X1 [Pelodiscus sinensis]<>XP_014436135.1 PREDICTED: complement C1q tumor necrosis factor-related protein 2 isoform X1 [Pelodiscus sinensis]<>XP_014436136.1 PREDICTED: complement C1q tumor necrosis factor-related protein 2 isoform X1 [Pelodiscus sinensis]<>XP_014436137.1 PREDICTED: complement C1q tumor necrosis factor-relate…	GO:0042802;GO:0051260;GO:0005102;GO:0046321;GO:0005581;GO:0005576;GO:0005615;GO:0046326;GO:0045725;GO:0070206;GO:0070208;GO:0000187	identical protein binding;protein homooligomerization;receptor binding;positive regulation of fatty acid oxidation;collagen trimer;extracellular region;extracellular space;positive regulation of glucose import;positive regulation of glycogen biosynthetic process;protein trimerization;protein heterotrimerization;activation of MAPK activity	-	-	-	-	-	-	sp|Q9BXJ5|C1QT2_HUMAN;gnl|BL_ORD_ID|305182;gnl|BL_ORD_ID|307801	sp|Q9BXJ5|C1QT2_HUMAN Complement C1q tumor necrosis factor-related protein 2 OS=Homo sapiens GN=C1QTNF2 PE=1 SV=1;sp|Q9BXJ5|C1QT2_HUMAN Complement C1q tumor necrosis factor-related protein 2 OS=Homo sapiens GN=C1QTNF2 PE=1 SV=1;sp|Q9D8U4|C1QT2_MOUSE Complement C1q tumor necrosis factor-related protein 2 OS=Mus musculus GN=C1qtnf2 PE=1 SV=1
C1QTNF5	0.848805	0.485721	0.755112	1.38292	1.3216	1.19479	1.27231	1.25768	1.04258	1.11294	1.17754	1.24846	0.55145	0.5302	0.574031	0.781755	0.810233	0.814248	PREDICTED: complement C1q tumor necrosis factor-related protein 5 [Pelodiscus sinensis]	GO:0005581;GO:0070062;GO:0005576	collagen trimer;extracellular exosome;extracellular region	-	-	-	-	-	-	gnl|BL_ORD_ID|306431;sp|Q9BXJ0|C1QT5_HUMAN	sp|Q9BXJ0|C1QT5_HUMAN Complement C1q tumor necrosis factor-related protein 5 OS=Homo sapiens GN=C1QTNF5 PE=1 SV=1;sp|Q9BXJ0|C1QT5_HUMAN Complement C1q tumor necrosis factor-related protein 5 OS=Homo sapiens GN=C1QTNF5 PE=1 SV=1
C1R	0.634477	0.506505	0.584331	0.643453	0.906335	0.691965	0.854913	0.848189	0.894316	1.05652	1.37162	0.926342	1.16316	1.26482	0.829947	0.652246	0.893762	1.02243	PREDICTED: complement C1r subcomponent [Pelodiscus sinensis]	GO:0008233;GO:0006956;GO:0005509;GO:0005576;GO:0016787;GO:0006508;GO:0004252;GO:0046872	peptidase activity;complement activation;calcium ion binding;extracellular region;hydrolase activity;proteolysis;serine-type endopeptidase activity;metal ion binding	K01330	C1R	http://www.genome.jp/dbget-bin/www_bget?ko:K01330	Phagosome;Complement and coagulation cascades	ko04145,ko04610	KOG3714(O)(Meprin A metalloprotease)	sp|Q5R1W3|C1R_PANTR;sp|P00736|C1R_HUMAN;sp|Q6P6T1|C1S_RAT;gnl|BL_ORD_ID|310075;sp|Q5R544|C1R_PONAB	sp|Q5R1W3|C1R_PANTR Complement C1r subcomponent OS=Pan troglodytes GN=C1R PE=2 SV=1;sp|P00736|C1R_HUMAN Complement C1r subcomponent OS=Homo sapiens GN=C1R PE=1 SV=2;sp|Q6P6T1|C1S_RAT Complement C1s subcomponent OS=Rattus norvegicus GN=C1s PE=2 SV=2;sp|P00736|C1R_HUMAN Complement C1r subcomponent OS=Homo sapiens GN=C1R PE=1 SV=2;sp|Q5R544|C1R_PONAB Complement C1r subcomponent OS=Pongo abelii GN=C1…
C2CD2	0.640481	0.737193	0.523746	0.565848	0.475671	0.606381	0.937518	0.720159	0.780317	0.876795	1.09342	0.704151	1.02366	1.18355	1.30557	1.00303	0.926857	1.12123	PREDICTED: C2 domain-containing protein 2, partial [Chelonia mydas];PREDICTED: C2 domain-containing protein 2 isoform X2 [Pelodiscus sinensis];PREDICTED: C2 domain-containing protein 2 isoform X1 [Pelodiscus sinensis]	GO:0005829;GO:0016021;GO:0016020;GO:0005634	cytosol;integral component of membrane;membrane;nucleus	-	-	-	-	-	-	sp|Q9Y426|C2CD2_HUMAN;gnl|BL_ORD_ID|309706	sp|Q9Y426|C2CD2_HUMAN C2 domain-containing protein 2 OS=Homo sapiens GN=C2CD2 PE=1 SV=2;sp|Q9Y426|C2CD2_HUMAN C2 domain-containing protein 2 OS=Homo sapiens GN=C2CD2 PE=1 SV=2
C7	0.173186	0.075547	0.431364	0.235528	0.426511	0.232996	0.880242	0.720159	0.459392	0.711807	0.431364	0.80956	0.294466	0.485721	0.428135	0.382017	0.298853	0.303196	PREDICTED: complement component C7 isoform X2 [Pelodiscus sinensis];PREDICTED: complement component C7 isoform X1 [Pelodiscus sinensis]	GO:0005579;GO:0006955	membrane attack complex;immune response	K03996	C7	http://www.genome.jp/dbget-bin/www_bget?ko:K03996	Complement and coagulation cascades	ko04610	KOG4297(TV)(C-type lectin)	gnl|BL_ORD_ID|317994	sp|P10643|CO7_HUMAN Complement component C7 OS=Homo sapiens GN=C7 PE=1 SV=2
C8B	0.158362	0.217484	0.136721	0.0128372	0.0413927	0.123852	0.120574	0.178977	0.161368	0.247973	1.68762	0.264818	0.553883	0.562293	0.409933	0.494155	0.222716	0.357935	PREDICTED: complement component C8 beta chain [Pelodiscus sinensis]	GO:0070062;GO:1903561;GO:0005579;GO:0006955	extracellular exosome;extracellular vesicle;membrane attack complex;immune response	K03998	C8B	http://www.genome.jp/dbget-bin/www_bget?ko:K03998	Complement and coagulation cascades	ko04610	KOG1215(T)(Low-density lipoprotein receptors containing Ca2+-binding EGF-like domains)	gnl|BL_ORD_ID|333772	sp|P07358|CO8B_HUMAN Complement component C8 beta chain OS=Homo sapiens GN=C8B PE=1 SV=3
CA10	0.638489	0.591065	0.833147	0.716838	0.684845	0.739572	0.650308	0.720986	0.748963	0.49693	0.666518	0.547775	0.0934217	0.173186	0.103804	0.146128	0.383815	0.31597	PREDICTED: uncharacterized protein LOC104477202, partial [Chlamydotis macqueenii];PREDICTED: carbonic anhydrase-related protein 10 isoform X2 [Pelodiscus sinensis];PREDICTED: carbonic anhydrase-related protein 10-like [Pelecanus crispus];rCG35045, isoform CRA_a [Rattus norvegicus]<>EDM05683.1 rCG35045, isoform CRA_a [Rattus norvegicus];PREDICTED: carbonic anhydrase-related protein 10-like [Bucero…	GO:0008150;GO:0003674;GO:0005575	biological_process;molecular_function;cellular_component	-	-	-	-	-	KOG0382(R)(Carbonic anhydrase)	sp|Q5R4U0|CAH10_PONAB;gnl|BL_ORD_ID|310774;gnl|BL_ORD_ID|307432;sp|P61215|CAH10_MOUSE;sp|Q9N085|CAH10_MACFA	sp|Q5R4U0|CAH10_PONAB Carbonic anhydrase-related protein 10 OS=Pongo abelii GN=CA10 PE=2 SV=1;sp|P61215|CAH10_MOUSE Carbonic anhydrase-related protein 10 OS=Mus musculus GN=Ca10 PE=1 SV=1;sp|Q5R4U0|CAH10_PONAB Carbonic anhydrase-related protein 10 OS=Pongo abelii GN=CA10 PE=2 SV=1;sp|P61215|CAH10_MOUSE Carbonic anhydrase-related protein 10 OS=Mus musculus GN=Ca10 PE=1 SV=1;sp|Q9N085|CAH10_MACFA C…
CA4	0.480007	0.376577	0.5302	0.498311	0.639486	0.549003	0.758155	0.605305	0.376577	0.639486	0.501059	0.85248	0.0170333	0.0170333	0.0863598	0.0606978	0.071882	0.0530784	PREDICTED: carbonic anhydrase 4 [Pelodiscus sinensis]	GO:0070062;GO:0004089;GO:0005886;GO:0030667;GO:0031362;GO:0030658;GO:0016324;GO:0048471;GO:0046658;GO:0005793;GO:0005802;GO:0006730;GO:0015701;GO:0031225;GO:0008270;GO:0046872	extracellular exosome;carbonate dehydratase activity;plasma membrane;secretory granule membrane;anchored component of external side of plasma membrane;transport vesicle membrane;apical plasma membrane;perinuclear region of cytoplasm;anchored component of plasma membrane;endoplasmic reticulum-Golgi intermediate compartment;trans-Golgi network;one-carbon metabolic process;bicarbonate transport;anch…	K18246	CA4	http://www.genome.jp/dbget-bin/www_bget?ko:K18246	Nitrogen metabolism;Proximal tubule bicarbonate reclamation	ko00910,ko04964	KOG0382(R)(Carbonic anhydrase)	gnl|BL_ORD_ID|311450	sp|P48284|CAH4_RAT Carbonic anhydrase 4 OS=Rattus norvegicus GN=Ca4 PE=1 SV=1
CA6	0.11059	0.143015	0.09691	0.0606978	0.0899051	0.0170333	0.0606978	0.11059	0.103804	0.190332	0.889862	0.139879	0.0530784	0.071882	0.0681859	0.0253059	0.11059	0.0413927	PREDICTED: carbonic anhydrase 6 [Pelodiscus sinensis]<>XP_006127159.1 PREDICTED: carbonic anhydrase 6 [Pelodiscus sinensis]	GO:0005737;GO:0070062;GO:0004089;GO:0001580;GO:0005829;GO:0005615;GO:0006730;GO:0008270;GO:0046872	cytoplasm;extracellular exosome;carbonate dehydratase activity;detection of chemical stimulus involved in sensory perception of bitter taste;cytosol;extracellular space;one-carbon metabolic process;zinc ion binding;metal ion binding	K01672	E4.2.1.1	http://www.genome.jp/dbget-bin/www_bget?ko:K01672	Nitrogen metabolism	ko00910	KOG0382(R)(Carbonic anhydrase)	gnl|BL_ORD_ID|312105	sp|P23280|CAH6_HUMAN Carbonic anhydrase 6 OS=Homo sapiens GN=CA6 PE=1 SV=3
CAB39L	0.87564	0.816241	0.719331	0.71433	0.820858	0.683047	1.00389	0.97635	0.870404	0.892095	0.80956	0.900367	0.958086	0.897077	0.781755	0.860338	0.91803	1	PREDICTED: calcium-binding protein 39-like isoform X1 [Pelodiscus sinensis]<>XP_006121408.1 PREDICTED: calcium-binding protein 39-like isoform X1 [Pelodiscus sinensis]<>XP_006121409.1 PREDICTED: calcium-binding protein 39-like isoform X1 [Pelodiscus sinensis]<>XP_014428151.1 PREDICTED: calcium-binding protein 39-like isoform X1 [Pelodiscus sinensis];PREDICTED: calcium-binding protein 39-like isof…	GO:0070062	extracellular exosome	K08272	CAB39,MO25	http://www.genome.jp/dbget-bin/www_bget?ko:K08272	AMPK signaling pathway;mTOR signaling pathway	ko04152,ko04150	KOG1566(S)(Conserved protein Mo25)	sp|Q9H9S4|CB39L_HUMAN;gnl|BL_ORD_ID|321394	sp|Q9H9S4|CB39L_HUMAN Calcium-binding protein 39-like OS=Homo sapiens GN=CAB39L PE=1 SV=3;sp|Q9H9S4|CB39L_HUMAN Calcium-binding protein 39-like OS=Homo sapiens GN=CAB39L PE=1 SV=3
CACFD1	0.146128	0.127105	0.164353	0.178977	0.271842	0.173186	0.466868	0.350248	0.326336	0.49693	0.539076	0.553883	0.10721	0.235528	0.167317	0.0253059	0.117271	0.1959	PREDICTED: calcium channel flower homolog [Pelodiscus sinensis]	GO:0016021;GO:0016020	integral component of membrane;membrane	-	-	-	-	-	-	gnl|BL_ORD_ID|393895	sp|Q9UGQ2|FLOWR_HUMAN Calcium channel flower homolog OS=Homo sapiens GN=CACFD1 PE=1 SV=1
CACNA2D1	0.840733	0.816241	0.697229	0.658011	0.598791	0.725912	0.7348	0.531479	0.776701	0.691081	0.800717	0.658965	0.591065	0.576341	0.672098	0.860338	0.948902	0.790988	PREDICTED: voltage-dependent calcium channel subunit alpha-2/delta-1 isoform X6 [Pelodiscus sinensis];PREDICTED: voltage-dependent calcium channel subunit alpha-2/delta-1 isoform X1 [Pelodiscus sinensis];PREDICTED: voltage-dependent calcium channel subunit alpha-2/delta-1 isoform X4 [Pelodiscus sinensis];PREDICTED: voltage-dependent calcium channel subunit alpha-2/delta-1 isoform X7 [Pelodiscus s…	GO:0070062;GO:0030315;GO:0005245;GO:0016529;GO:0051924;GO:0005891;GO:1990454;GO:0006816	extracellular exosome;T-tubule;voltage-gated calcium channel activity;sarcoplasmic reticulum;regulation of calcium ion transport;voltage-gated calcium channel complex;L-type voltage-gated calcium channel complex;calcium ion transport	K04858	CACNA2D1	http://www.genome.jp/dbget-bin/www_bget?ko:K04858	MAPK signaling pathway;Adrenergic signaling in cardiomyocytes;Cardiac muscle contraction;Oxytocin signaling pathway	ko04010,ko04261,ko04260,ko04921	KOG2353(PT)(L-type voltage-dependent Ca2+ channel, alpha2/delta subunit)	gnl|BL_ORD_ID|311411;sp|P54289|CA2D1_HUMAN;sp|O08532|CA2D1_MOUSE;sp|P13806|CA2D1_RABIT;gnl|BL_ORD_ID|306517	sp|P54289|CA2D1_HUMAN Voltage-dependent calcium channel subunit alpha-2/delta-1 OS=Homo sapiens GN=CACNA2D1 PE=1 SV=3;sp|P54289|CA2D1_HUMAN Voltage-dependent calcium channel subunit alpha-2/delta-1 OS=Homo sapiens GN=CACNA2D1 PE=1 SV=3;sp|O08532|CA2D1_MOUSE Voltage-dependent calcium channel subunit alpha-2/delta-1 OS=Mus musculus GN=Cacna2d1 PE=1 SV=1;sp|P13806|CA2D1_RABIT Voltage-dependent calci…
CACNA2D2	0.816904	0.748963	0.759668	1.4101	1.29754	1.05956	0.824126	0.79588	0.802774	0.886491	1.0187	0.854913	0.5302	0.502427	0.644439	0.567026	0.49276	0.653213	PREDICTED: voltage-dependent calcium channel subunit alpha-2/delta-2 [Pelodiscus sinensis];Voltage-dependent calcium channel subunit alpha-2/delta-2 [Chelonia mydas]	-	-	K04859	CACNA2D2	http://www.genome.jp/dbget-bin/www_bget?ko:K04859	MAPK signaling pathway;Adrenergic signaling in cardiomyocytes;Cardiac muscle contraction;Oxytocin signaling pathway	ko04010,ko04261,ko04260,ko04921	KOG2353(PT)(L-type voltage-dependent Ca2+ channel, alpha2/delta subunit)	gnl|BL_ORD_ID|306518;sp|Q8CFG6|CA2D2_RAT	sp|Q8CFG6|CA2D2_RAT Voltage-dependent calcium channel subunit alpha-2/delta-2 OS=Rattus norvegicus GN=Cacna2d2 PE=2 SV=1;sp|Q8CFG6|CA2D2_RAT Voltage-dependent calcium channel subunit alpha-2/delta-2 OS=Rattus norvegicus GN=Cacna2d2 PE=2 SV=1
CACNB3	0.63749	0.763428	0.844477	1.26951	1.256	1.33425	0.783189	0.695482	0.879669	0.634477	0.710963	0.79379	0.501059	0.298853	0.507856	0.782473	0.622214	0.759668	PREDICTED: voltage-dependent L-type calcium channel subunit beta-3 [Pelodiscus sinensis]	-	-	K04864	CACNB3	http://www.genome.jp/dbget-bin/www_bget?ko:K04864	MAPK signaling pathway;Adrenergic signaling in cardiomyocytes;Cardiac muscle contraction;Oxytocin signaling pathway	ko04010,ko04261,ko04260,ko04921	KOG3812(PT)(L-type voltage-dependent Ca2+ channel, beta subunit)	sp|P54286|CACB3_RABIT;gnl|BL_ORD_ID|313107	sp|P54286|CACB3_RABIT Voltage-dependent L-type calcium channel subunit beta-3 OS=Oryctolagus cuniculus GN=CACNB3 PE=1 SV=1;sp|P54286|CACB3_RABIT Voltage-dependent L-type calcium channel subunit beta-3 OS=Oryctolagus cuniculus GN=CACNB3 PE=1 SV=1
CACNG5	0.334454	0.658011	0.348305	0.354108	0.414973	0.423246	0.305351	0.235528	0.346353	0.274158	0.252853	0.432969	0.0211893	0.075547	0.075547	0.0293838	0.09691	0.170262	voltage-dependent calcium channel gamma-5 subunit [Alligator mississippiensis];PREDICTED: voltage-dependent calcium channel gamma-5 subunit [Pelodiscus sinensis]<>XP_006110639.1 PREDICTED: voltage-dependent calcium channel gamma-5 subunit [Pelodiscus sinensis];PREDICTED: voltage-dependent calcium channel gamma-5 subunit isoform X1 [Alligator mississippiensis]	GO:0016020;GO:0006816;GO:0070588;GO:0016021;GO:0006810;GO:0005244;GO:0034765;GO:0006811;GO:0005262	membrane;calcium ion transport;calcium ion transmembrane transport;integral component of membrane;transport;voltage-gated ion channel activity;regulation of ion transmembrane transport;ion transport;calcium channel activity	K04870	CACNG5	http://www.genome.jp/dbget-bin/www_bget?ko:K04870	MAPK signaling pathway;Adrenergic signaling in cardiomyocytes;Cardiac muscle contraction;Oxytocin signaling pathway	ko04010,ko04261,ko04260,ko04921	-	sp|Q8VHW4|CCG5_MOUSE;gnl|BL_ORD_ID|312969	sp|Q8VHW4|CCG5_MOUSE Voltage-dependent calcium channel gamma-5 subunit OS=Mus musculus GN=Cacng5 PE=1 SV=1;sp|Q8VHW4|CCG5_MOUSE Voltage-dependent calcium channel gamma-5 subunit OS=Mus musculus GN=Cacng5 PE=1 SV=1
CADM2	0.40654	0.440909	0.506505	0.593286	0.378398	0.462398	0.463893	0.39794	0.472756	0.454845	0.444045	0.495544	0.0374265	0.10721	0.0827854	0.0899051	0.146128	0.071882	PREDICTED: cell adhesion molecule 2 isoform X2 [Chrysemys picta bellii];PREDICTED: cell adhesion molecule 2 isoform X2 [Pelodiscus sinensis];PREDICTED: cell adhesion molecule 2 isoform X1 [Chrysemys picta bellii]	GO:0016020;GO:0016021	membrane;integral component of membrane	K06782	CADM2,IGSF4D,NECL3	http://www.genome.jp/dbget-bin/www_bget?ko:K06782	-	-	KOG3515(R)(Predicted transmembrane protein of the immunoglobulin family of cell adhesion molecules)	sp|Q8N3J6|CADM2_HUMAN;gnl|BL_ORD_ID|307929	sp|Q8N3J6|CADM2_HUMAN Cell adhesion molecule 2 OS=Homo sapiens GN=CADM2 PE=2 SV=1;sp|Q8N3J6|CADM2_HUMAN Cell adhesion molecule 2 OS=Homo sapiens GN=CADM2 PE=2 SV=1
CADM3	0.311754	0.854913	0.675778	0.574031	0.514548	0.230449	0.850033	0.740363	0.739572	0.681241	0.840106	0.902547	0.627366	1.63919	1.39759	0.774517	0.650308	0.588832	PREDICTED: cell adhesion molecule 3 [Chelonia mydas];PREDICTED: cell adhesion molecule 3 isoform X3 [Chrysemys picta bellii];PREDICTED: cell adhesion molecule 3 [Pelodiscus sinensis]	-	-	K06780	CADM3,IGSF4B,NECL1,TSLL1	http://www.genome.jp/dbget-bin/www_bget?ko:K06780	Cell adhesion molecules (CAMs)	ko04514	-	gnl|BL_ORD_ID|310767;sp|Q8N126|CADM3_HUMAN	sp|Q8N126|CADM3_HUMAN Cell adhesion molecule 3 OS=Homo sapiens GN=CADM3 PE=1 SV=1;sp|Q8N126|CADM3_HUMAN Cell adhesion molecule 3 OS=Homo sapiens GN=CADM3 PE=1 SV=1
CALCRL	0.702431	0.451786	0.489958	0.729974	0.797268	0.635484	0.829947	0.942008	0.699838	0.969416	0.856124	1.12613	0.281033	0.190332	0.271842	0.330414	0.344392	0.292256	PREDICTED: calcitonin gene-related peptide type 1 receptor [Pelodiscus sinensis]<>XP_006114877.1 PREDICTED: calcitonin gene-related peptide type 1 receptor [Pelodiscus sinensis]<>XP_014424914.1 PREDICTED: calcitonin gene-related peptide type 1 receptor [Pelodiscus sinensis]	GO:0007166;GO:0015031;GO:0001525;GO:0008565;GO:0005886;GO:0004888;GO:0005768;GO:0016021;GO:0007186;GO:0001605;GO:0008284;GO:0016020;GO:0031623;GO:0004871;GO:0030819;GO:0007165;GO:0001635;GO:0005764;GO:0006171;GO:0005783;GO:0071329;GO:0004948;GO:0004930	cell surface receptor signaling pathway;protein transport;angiogenesis;protein transporter activity;plasma membrane;transmembrane signaling receptor activity;endosome;integral component of membrane;G-protein coupled receptor signaling pathway;adrenomedullin receptor activity;positive regulation of cell proliferation;membrane;receptor internalization;signal transducer activity;positive regulation …	K04577	CALCRL	http://www.genome.jp/dbget-bin/www_bget?ko:K04577	Neuroactive ligand-receptor interaction;Vascular smooth muscle contraction	ko04080,ko04270	KOG4564(T)(Adenylate cyclase-coupled calcitonin receptor)	gnl|BL_ORD_ID|313601	sp|Q8WN93|CALRL_PIG Calcitonin gene-related peptide type 1 receptor OS=Sus scrofa GN=CALCRL PE=1 SV=1
CALML3	0.437751	0.271842	0.561101	0.710963	0.810233	0.535294	0.952792	1.041	0.900367	1.06446	0.812245	0.876795	1.28466	0.876795	0.926857	1.19033	0.773786	1.14333	PREDICTED: calmodulin-like protein 3 [Pelodiscus sinensis]	GO:0070062;GO:0005509	extracellular exosome;calcium ion binding	K02183	CALM	http://www.genome.jp/dbget-bin/www_bget?ko:K02183	Oocyte meiosis;Apelin signaling pathway;Calcium signaling pathway;MAPK signaling pathway - plant;Phosphatidylinositol signaling system;Rap1 signaling pathway;Ras signaling pathway;cAMP signaling pathway;cGMP - PKG signaling pathway;Adrenergic signaling in cardiomyocytes;Vascular smooth muscle contraction;Gastric acid secretion;Salivary secretion;Aldosterone synthesis and secretion;Estrogen signal…	ko04114,ko04371,ko04020,ko04016,ko04070,ko04015,ko04014,ko04024,ko04022,ko04261,ko04270,ko04971,ko04970,ko04925,ko04915,ko04922,ko04912,ko04910,ko04916,ko04921,ko04924,ko04713,ko04626,ko04728,ko04720,ko04722,ko04750,ko04740,ko04744,ko04745	KOG0027(T)(Calmodulin and related proteins (EF-Hand superfamily))	sp|P02597|CALMS_CHICK;gnl|BL_ORD_ID|310845	sp|P02597|CALMS_CHICK Calmodulin, striated muscle OS=Gallus gallus GN=CCM1 PE=3 SV=2;sp|P02597|CALMS_CHICK Calmodulin, striated muscle OS=Gallus gallus GN=CCM1 PE=3 SV=2
CALY	0.78533	0.724276	0.922725	0.975891	0.838849	1.02776	0.793092	0.816904	0.760422	0.547775	0.537819	0.725095	0.451786	0.252853	0.274158	0.521138	0.578639	0.419956	PREDICTED: neuron-specific vesicular protein calcyon [Pelodiscus sinensis]	GO:0007212;GO:0032051;GO:0048268;GO:0016021;GO:0016020;GO:0005887;GO:0031410;GO:0045807	dopamine receptor signaling pathway;clathrin light chain binding;clathrin coat assembly;integral component of membrane;membrane;integral component of plasma membrane;cytoplasmic vesicle;positive regulation of endocytosis	-	-	-	-	-	-	gnl|BL_ORD_ID|426635	sp|Q8QFP1|NSG1_CHICK Neuron-specific protein family member 1 OS=Gallus gallus GN=NSG1 PE=2 SV=1
CAMK1D	0.465383	0.418301	0.457882	0.485721	0.549003	0.40654	0.578639	0.683947	0.546543	0.604226	0.621176	0.741152	0.260071	0.155336	0.167317	0.25042	0.396199	0.20412	PREDICTED: calcium/calmodulin-dependent protein kinase type 1D isoform X2 [Pseudopodoces humilis]<>XP_015482848.1 PREDICTED: calcium/calmodulin-dependent protein kinase type 1D isoform X2 [Parus major];PREDICTED: calcium/calmodulin-dependent protein kinase type 1D [Pelodiscus sinensis]	-	-	K08794	CAMK1	http://www.genome.jp/dbget-bin/www_bget?ko:K08794	Aldosterone synthesis and secretion;Oxytocin signaling pathway	ko04925,ko04921	KOG0032(T)(Ca2+/calmodulin-dependent protein kinase, EF-Hand protein superfamily)	sp|Q8IU85|KCC1D_HUMAN;sp|Q8BW96|KCC1D_MOUSE;gnl|BL_ORD_ID|66205	sp|Q8IU85|KCC1D_HUMAN Calcium/calmodulin-dependent protein kinase type 1D OS=Homo sapiens GN=CAMK1D PE=1 SV=1;sp|Q8BW96|KCC1D_MOUSE Calcium/calmodulin-dependent protein kinase type 1D OS=Mus musculus GN=Camk1d PE=1 SV=2;sp|Q8IU85|KCC1D_HUMAN Calcium/calmodulin-dependent protein kinase type 1D OS=Homo sapiens GN=CAMK1D PE=1 SV=1
CAPN2	0.10721	0.260071	0.161368	0.283301	0.33646	0.245513	0.243038	0.5302	0.367356	0.340444	0.62634	0.49693	0.454845	0.64836	0.460898	0.849419	0.437751	0.797268	PREDICTED: LOW QUALITY PROTEIN: calpain-2 catalytic subunit [Pelodiscus sinensis]	GO:0008233;GO:0005737;GO:0031143;GO:0070062;GO:0005622;GO:0051493;GO:0004198;GO:0005886;GO:0071230;GO:0005509;GO:0008234;GO:0045121;GO:0005829;GO:0007520;GO:0097038;GO:0005925;GO:0005783;GO:0051603;GO:0016787;GO:0006508	peptidase activity;cytoplasm;pseudopodium;extracellular exosome;intracellular;regulation of cytoskeleton organization;calcium-dependent cysteine-type endopeptidase activity;plasma membrane;cellular response to amino acid stimulus;calcium ion binding;cysteine-type peptidase activity;membrane raft;cytosol;myoblast fusion;perinuclear endoplasmic reticulum;focal adhesion;endoplasmic reticulum;proteol…	K03853	CAPN2	http://www.genome.jp/dbget-bin/www_bget?ko:K03853	Apoptosis;Necroptosis;Focal adhesion;Protein processing in endoplasmic reticulum	ko04210,ko04217,ko04510,ko04141	KOG0045(OT)(Cytosolic Ca2+-dependent cysteine protease (calpain), large subunit (EF-Hand protein superfamily))	gnl|BL_ORD_ID|322291;sp|Q92178|CAN2_CHICK	sp|Q92178|CAN2_CHICK Calpain-2 catalytic subunit OS=Gallus gallus GN=CAPN2 PE=2 SV=3;sp|Q92178|CAN2_CHICK Calpain-2 catalytic subunit OS=Gallus gallus GN=CAPN2 PE=2 SV=3
CAPN9	0.045323	0.146128	0.326336	0.071882	0.071882	0.0606978	0.164353	0.222716	0.100371	0.113943	0.0899051	0.217484	0.283301	0.198657	0.127105	0.432969	0.152288	0.340444	PREDICTED: calpain-9 [Pelodiscus sinensis]	GO:0008233;GO:0007586;GO:0005737;GO:0005622;GO:0004198;GO:0005509;GO:0008234;GO:0016787;GO:0006508	peptidase activity;digestion;cytoplasm;intracellular;calcium-dependent cysteine-type endopeptidase activity;calcium ion binding;cysteine-type peptidase activity;hydrolase activity;proteolysis	K08578	CAPN9	http://www.genome.jp/dbget-bin/www_bget?ko:K08578	-	-	KOG0045(OT)(Cytosolic Ca2+-dependent cysteine protease (calpain), large subunit (EF-Hand protein superfamily))	sp|O14815|CAN9_HUMAN;gnl|BL_ORD_ID|313157	sp|O14815|CAN9_HUMAN Calpain-9 OS=Homo sapiens GN=CAPN9 PE=1 SV=1;sp|O14815|CAN9_HUMAN Calpain-9 OS=Homo sapiens GN=CAPN9 PE=1 SV=1
CARNS1	1.06595	0.608526	0.691081	1.34772	1.41996	1.26741	1.00817	0.959041	0.792392	1.02078	0.991226	1.03262	0.498311	0.526339	0.752816	0.932474	0.884795	0.924279	PREDICTED: LOW QUALITY PROTEIN: carnosine synthase 1 [Pelodiscus sinensis]	-	-	K14755	CRNS1,ATPGD1	http://www.genome.jp/dbget-bin/www_bget?ko:K14755	Arginine and proline metabolism;Histidine metabolism;beta-Alanine metabolism	ko00330,ko00340,ko00410	-	sp|D3KCC4|CRNS1_CHICK;sp|A5YM72|CRNS1_HUMAN;gnl|BL_ORD_ID|347911	sp|D3KCC4|CRNS1_CHICK Carnosine synthase 1 OS=Gallus gallus GN=CARNS1 PE=1 SV=1;sp|A5YM72|CRNS1_HUMAN Carnosine synthase 1 OS=Homo sapiens GN=CARNS1 PE=1 SV=3;sp|A5YM72|CRNS1_HUMAN Carnosine synthase 1 OS=Homo sapiens GN=CARNS1 PE=1 SV=3
CARS	1.1089	1.18808	1.21617	0.902547	0.898176	0.841359	0.965202	0.901458	0.925828	0.966142	0.820201	0.975432	0.603144	0.683047	0.652246	0.597695	0.649335	0.62634	PREDICTED: cysteine--tRNA ligase, cytoplasmic isoform X1 [Pelodiscus sinensis];PREDICTED: cysteine--tRNA ligase, cytoplasmic isoform X2 [Pelodiscus sinensis]	GO:0005737;GO:0006418;GO:0004812;GO:0005524;GO:0004817;GO:0000049;GO:0006423;GO:0000166;GO:0042803	cytoplasm;tRNA aminoacylation for protein translation;aminoacyl-tRNA ligase activity;ATP binding;cysteine-tRNA ligase activity;tRNA binding;cysteinyl-tRNA aminoacylation;nucleotide binding;protein homodimerization activity	K01883	CARS,cysS	http://www.genome.jp/dbget-bin/www_bget?ko:K01883	Aminoacyl-tRNA biosynthesis	ko00970	KOG2007(J)(Cysteinyl-tRNA synthetase)	sp|Q5F408|SYCC_CHICK;gnl|BL_ORD_ID|502778;gnl|BL_ORD_ID|501776	sp|Q5F408|SYCC_CHICK Cysteine--tRNA ligase, cytoplasmic OS=Gallus gallus GN=CARS PE=2 SV=1;sp|Q5F408|SYCC_CHICK Cysteine--tRNA ligase, cytoplasmic OS=Gallus gallus GN=CARS PE=2 SV=1;sp|Q9ER72|SYCC_MOUSE Cysteine--tRNA ligase, cytoplasmic OS=Mus musculus GN=Cars PE=1 SV=2
CASC5	0.965672	0.972666	0.869232	0.888741	0.856729	0.822168	0.753583	0.860338	0.868056	0.753583	0.820201	0.893207	0.416641	0.350248	0.342423	0.330414	0.517196	0.451786	PREDICTED: protein CASC5 isoform X1 [Pelodiscus sinensis];PREDICTED: protein CASC5 isoform X2 [Pelodiscus sinensis]<>XP_006128730.1 PREDICTED: protein CASC5 isoform X2 [Pelodiscus sinensis];PREDICTED: protein CASC5 [Chrysemys picta bellii];PREDICTED: LOW QUALITY PROTEIN: protein CASC5 [Chelonia mydas];PREDICTED: protein CASC5 isoform X3 [Pelodiscus sinensis]	-	-	K11542	CASC5,KNL1	http://www.genome.jp/dbget-bin/www_bget?ko:K11542	-	-	-	gnl|BL_ORD_ID|65648;sp|Q8NG31|KNL1_HUMAN	sp|Q8NG31|KNL1_HUMAN Kinetochore scaffold 1 OS=Homo sapiens GN=KNL1 PE=1 SV=3;sp|Q8NG31|KNL1_HUMAN Kinetochore scaffold 1 OS=Homo sapiens GN=KNL1 PE=1 SV=3
CASP2	0.985426	0.960471	0.984077	1.06145	1.08636	1.00775	1.0086	0.97359	1.09656	1.1345	1.03981	1.12156	0.582063	0.632457	0.655138	0.669317	0.766413	0.731589	PREDICTED: caspase-2 isoform X1 [Pelodiscus sinensis]	GO:0008233;GO:0004197;GO:0008234;GO:0006915;GO:0016787;GO:0006508;GO:0042981	peptidase activity;cysteine-type endopeptidase activity;cysteine-type peptidase activity;apoptotic process;hydrolase activity;proteolysis;regulation of apoptotic process	K02186	CASP2	http://www.genome.jp/dbget-bin/www_bget?ko:K02186	Apoptosis	ko04210	KOG3573(D)(Caspase, apoptotic cysteine protease)	sp|Q98943|CASP2_CHICK;gnl|BL_ORD_ID|320795	sp|Q98943|CASP2_CHICK Caspase-2 OS=Gallus gallus GN=CASP2 PE=2 SV=2;sp|Q98943|CASP2_CHICK Caspase-2 OS=Gallus gallus GN=CASP2 PE=2 SV=2
CASR	0.456366	0.193125	0.117271	0.235528	0.372912	0.440909	0.948902	0.904716	0.70927	0.849419	0.770852	0.767156	0.130334	0.298853	0.0334238	0.307496	0.164353	0.264818	PREDICTED: extracellular calcium-sensing receptor isoform X2 [Mustela putorius furo];PREDICTED: extracellular calcium-sensing receptor [Pelodiscus sinensis]	GO:0005737;GO:0071305;GO:0060613;GO:0048754;GO:0007193;GO:0043005;GO:0071333;GO:0000287;GO:0014070;GO:0001503;GO:0008144;GO:0006874;GO:0005886;GO:0032781;GO:0005509;GO:0016324;GO:0019901;GO:0043679;GO:0010628;GO:0071774;GO:0071456;GO:0050927;GO:0051924;GO:0016021;GO:0007186;GO:0044325;GO:0008284;GO:0016020;GO:0043025;GO:0005178;GO:0004871;GO:0002931;GO:0035729;GO:0007165;GO:1901653;GO:0006915;GO:…	cytoplasm;cellular response to vitamin D;fat pad development;branching morphogenesis of an epithelial tube;adenylate cyclase-inhibiting G-protein coupled receptor signaling pathway;neuron projection;cellular response to glucose stimulus;magnesium ion binding;response to organic cyclic compound;ossification;drug binding;cellular calcium ion homeostasis;plasma membrane;positive regulation of ATPase…	K04612	CASR	http://www.genome.jp/dbget-bin/www_bget?ko:K04612	NOD-like receptor signaling pathway	ko04621	KOG1056(PT)(Glutamate-gated metabotropic ion channel receptor subunit GRM2 and related subunits, G-protein coupled receptor superfamily)	sp|P41180|CASR_HUMAN;gnl|BL_ORD_ID|320812	sp|P41180|CASR_HUMAN Extracellular calcium-sensing receptor OS=Homo sapiens GN=CASR PE=1 SV=2;sp|P41180|CASR_HUMAN Extracellular calcium-sensing receptor OS=Homo sapiens GN=CASR PE=1 SV=2
CAV2	0.561101	0.770115	0.794488	0.618048	0.559907	0.549003	0.771587	0.778151	0.742725	0.818226	0.716838	0.62634	0.874482	0.557507	0.847573	0.927883	0.964731	0.788875	PREDICTED: caveolin-2 [Pelodiscus sinensis]	-	-	K12958	CAV2	http://www.genome.jp/dbget-bin/www_bget?ko:K12958	Focal adhesion;Endocytosis	ko04510,ko04144	-	sp|Q2IBF3|CAV2_GORGO;gnl|BL_ORD_ID|313694	sp|Q2IBF3|CAV2_GORGO Caveolin-2 OS=Gorilla gorilla gorilla GN=CAV2 PE=3 SV=1;sp|Q2QLF3|CAV2_PANTR Caveolin-2 OS=Pan troglodytes GN=CAV2 PE=3 SV=1
CBFA2T3	0.311754	0.298853	0.330414	0.439333	0.518514	0.338456	0.49276	0.44248	0.409933	0.409933	0.403121	0.536558	0.09691	0.120574	0.0569049	0.20412	0.225309	0.206826	PREDICTED: protein CBFA2T3 [Pelodiscus sinensis]	GO:0032436;GO:0008285;GO:0005654;GO:0005622;GO:0000122;GO:0005730;GO:0003682;GO:0045892;GO:0003714;GO:1903715;GO:0016020;GO:0006351;GO:0005515;GO:0030851;GO:0003700;GO:0030154;GO:0001666;GO:0045820;GO:0006355;GO:0000139;GO:0005634;GO:0046872;GO:0005794	positive regulation of proteasomal ubiquitin-dependent protein catabolic process;negative regulation of cell proliferation;nucleoplasm;intracellular;negative regulation of transcription from RNA polymerase II promoter;nucleolus;chromatin binding;negative regulation of transcription, DNA-templated;transcription corepressor activity;regulation of aerobic respiration;membrane;transcription, DNA-temp…	K10053	RUNX1T1,CBFA2T1	http://www.genome.jp/dbget-bin/www_bget?ko:K10053	-	-	-	sp|O54972|MTG16_MOUSE;gnl|BL_ORD_ID|100532	sp|O54972|MTG16_MOUSE Protein CBFA2T3 OS=Mus musculus GN=Cbfa2t3 PE=1 SV=2;sp|O54972|MTG16_MOUSE Protein CBFA2T3 OS=Mus musculus GN=Cbfa2t3 PE=1 SV=2
CBX7	1.05614	1.12581	1.11428	0.931966	0.902003	0.927883	0.965202	0.97635	1.077	0.957607	1.09307	0.871573	0.915927	1.0461	1.16495	1.16702	1.17609	1.09132	PREDICTED: chromobox protein homolog 7 isoform X1 [Pelodiscus sinensis];PREDICTED: chromobox protein homolog 7 isoform X2 [Pelodiscus sinensis]	GO:0035064;GO:0005737;GO:0003682;GO:0000792;GO:0005654;GO:0000790;GO:0048733;GO:0000122;GO:0003727;GO:0005634;GO:0035102;GO:0031519	methylated histone binding;cytoplasm;chromatin binding;heterochromatin;nucleoplasm;nuclear chromatin;sebaceous gland development;negative regulation of transcription from RNA polymerase II promoter;single-stranded RNA binding;nucleus;PRC1 complex;PcG protein complex	K11454	CBX7	http://www.genome.jp/dbget-bin/www_bget?ko:K11454	-	-	KOG1911(B)(Heterochromatin-associated protein HP1 and related CHROMO domain proteins)	gnl|BL_ORD_ID|311793;sp|O95931|CBX7_HUMAN	sp|O95931|CBX7_HUMAN Chromobox protein homolog 7 OS=Homo sapiens GN=CBX7 PE=1 SV=1;sp|O95931|CBX7_HUMAN Chromobox protein homolog 7 OS=Homo sapiens GN=CBX7 PE=1 SV=1
CCDC126	0.786751	0.942504	0.985426	0.814248	0.822168	0.838849	0.993436	0.830589	0.889862	0.899273	0.827369	0.893762	0.979548	0.961895	0.946452	0.886491	0.888741	0.994317	PREDICTED: coiled-coil domain-containing protein 126 isoform X2 [Pelodiscus sinensis]<>XP_014436684.1 PREDICTED: coiled-coil domain-containing protein 126 isoform X2 [Pelodiscus sinensis];PREDICTED: coiled-coil domain-containing protein 126 isoform X3 [Pelodiscus sinensis];PREDICTED: coiled-coil domain-containing protein 126 isoform X1 [Pelodiscus sinensis]<>XP_006138424.1 PREDICTED: coiled-coil …	GO:0016021;GO:0016020;GO:0006487;GO:0030144	integral component of membrane;membrane;protein N-linked glycosylation;alpha-1,6-mannosylglycoprotein 6-beta-N-acetylglucosaminyltransferase activity	-	-	-	-	-	-	gnl|BL_ORD_ID|326307;sp|Q96EE4|CC126_HUMAN	sp|Q96EE4|CC126_HUMAN Coiled-coil domain-containing protein 126 OS=Homo sapiens GN=CCDC126 PE=2 SV=2;sp|Q96EE4|CC126_HUMAN Coiled-coil domain-containing protein 126 OS=Homo sapiens GN=CCDC126 PE=2 SV=2
CCDC13	0.872739	1.2887	1.10243	1.05269	0.93902	1.17202	0.687529	0.777427	0.747412	0.659916	0.726727	0.498311	0.578639	0.752048	0.510545	1.16017	1.15259	0.904716	PREDICTED: coiled-coil domain-containing protein 13 isoform X2 [Pelodiscus sinensis];PREDICTED: coiled-coil domain-containing protein 13 isoform X4 [Pelodiscus sinensis];PREDICTED: coiled-coil domain-containing protein 13 isoform X3 [Pelodiscus sinensis];PREDICTED: coiled-coil domain-containing protein 13 isoform X1 [Pelodiscus sinensis]<>XP_006120678.1 PREDICTED: coiled-coil domain-containing pr…	-	-	-	-	-	-	-	-	gnl|BL_ORD_ID|323774;sp|Q8IYE1|CCD13_HUMAN	sp|Q8IYE1|CCD13_HUMAN Coiled-coil domain-containing protein 13 OS=Homo sapiens GN=CCDC13 PE=1 SV=2;sp|Q8IYE1|CCD13_HUMAN Coiled-coil domain-containing protein 13 OS=Homo sapiens GN=CCDC13 PE=1 SV=2
CCDC17	0.521138	0.49276	0.636488	0.808886	0.624282	0.836957	0.491362	0.340444	0.472756	0.55145	0.469822	0.30963	0.344392	0.324282	0.700704	0.471292	0.447158	0.547775	PREDICTED: coiled-coil domain-containing protein 17 [Pelodiscus sinensis]	-	-	-	-	-	-	-	-	gnl|BL_ORD_ID|324703;sp|Q96LX7|CCD17_HUMAN;sp|Q8CE13|CCD17_MOUSE	sp|Q96LX7|CCD17_HUMAN Coiled-coil domain-containing protein 17 OS=Homo sapiens GN=CCDC17 PE=1 SV=2;sp|Q96LX7|CCD17_HUMAN Coiled-coil domain-containing protein 17 OS=Homo sapiens GN=CCDC17 PE=1 SV=2;sp|Q8CE13|CCD17_MOUSE Coiled-coil domain-containing protein 17 OS=Mus musculus GN=Ccdc17 PE=2 SV=1
CCDC183	0.100371	0.164353	0.117271	0.220108	0.170262	0.235528	0.0569049	0.045323	0.0606978	0.0211893	0.58995	0.113943	0.071882	0.0413927	0.0293838	0.100371	0.130334	0.117271	PREDICTED: coiled-coil domain-containing protein 183 [Pelodiscus sinensis]	-	-	-	-	-	-	-	KOG4597(O)(Serine proteinase inhibitor (KU family) with thrombospondin repeats)	sp|A2AJB1|CC183_MOUSE;gnl|BL_ORD_ID|312855	sp|A2AJB1|CC183_MOUSE Coiled-coil domain-containing protein 183 OS=Mus musculus GN=Ccdc183 PE=2 SV=1;sp|A2AJB1|CC183_MOUSE Coiled-coil domain-containing protein 183 OS=Mus musculus GN=Ccdc183 PE=2 SV=1
CCDC190	0.937016	0.937016	0.942008	1.08743	1.02407	1.10924	0.861534	0.723456	0.943495	0.733999	0.704151	0.858537	0.669317	0.636488	0.666518	0.698101	0.659916	0.818226	PREDICTED: coiled-coil domain-containing protein C1orf110 homolog [Pelodiscus sinensis]	-	-	-	-	-	-	-	-	-	-
CCDC28A	0.634477	0.833784	0.735599	0.672098	0.480007	0.614897	0.737193	0.609594	0.619093	0.725095	0.61066	0.609594	0.652246	0.902003	0.925828	0.782473	0.69897	0.683947	PREDICTED: coiled-coil domain-containing protein 28A [Pelodiscus sinensis]	-	-	-	-	-	-	-	-	sp|Q8IWP9|CC28A_HUMAN;gnl|BL_ORD_ID|322099	sp|Q8IWP9|CC28A_HUMAN Coiled-coil domain-containing protein 28A OS=Homo sapiens GN=CCDC28A PE=1 SV=1;sp|Q8IWP9|CC28A_HUMAN Coiled-coil domain-containing protein 28A OS=Homo sapiens GN=CCDC28A PE=1 SV=1
CCDC64B	0.729165	0.793092	0.969416	0.783904	0.668386	0.955207	0.677607	0.691081	0.634477	0.636488	0.564666	0.546543	1.05881	0.863323	0.748188	1.31576	0.963788	1.07445	PREDICTED: bicaudal D-related protein 2 [Pelodiscus sinensis]	-	-	K16756	CCDC64	http://www.genome.jp/dbget-bin/www_bget?ko:K16756	-	-	-	sp|Q8CHW5|BICL2_MOUSE;gnl|BL_ORD_ID|306833;sp|Q6DIX6|BICL2_XENTR	sp|Q8CHW5|BICL2_MOUSE BICD family-like cargo adapter 2 OS=Mus musculus GN=Bicdl2 PE=1 SV=1;sp|A1A5D9|BICL2_HUMAN BICD family-like cargo adapter 2 OS=Homo sapiens GN=BICDL2 PE=1 SV=2;sp|Q6DIX6|BICL2_XENTR BICD family-like cargo adapter 2 OS=Xenopus tropicalis GN=bicdl2 PE=2 SV=1
CCDC69	0.423246	0.332438	0.471292	0.547775	0.499687	0.642465	0.436163	0.421604	0.419956	0.478566	0.457882	0.553883	0.214844	0.164353	0.181844	0.201397	0.290035	0.222716	PREDICTED: coiled-coil domain-containing protein 69 [Pelodiscus sinensis]	-	-	-	-	-	-	-	-	gnl|BL_ORD_ID|312945;sp|A6NI79|CCD69_HUMAN	sp|A6NI79|CCD69_HUMAN Coiled-coil domain-containing protein 69 OS=Homo sapiens GN=CCDC69 PE=1 SV=1;sp|A6NI79|CCD69_HUMAN Coiled-coil domain-containing protein 69 OS=Homo sapiens GN=CCDC69 PE=1 SV=1
CCDC78	0.514548	0.693727	0.698101	0.783904	0.539076	0.733197	0.332438	0.292256	0.447158	0.330414	0.499687	0.419956	0.305351	0.252853	0.344392	0.618048	0.439333	0.453318	PREDICTED: LOW QUALITY PROTEIN: coiled-coil domain-containing protein 78 [Pelodiscus sinensis]	-	-	-	-	-	-	-	-	sp|Q66KE8|CCD78_XENLA;gnl|BL_ORD_ID|324722	sp|Q66KE8|CCD78_XENLA Coiled-coil domain-containing protein 78 OS=Xenopus laevis GN=ccdc78 PE=2 SV=1;sp|Q66KE8|CCD78_XENLA Coiled-coil domain-containing protein 78 OS=Xenopus laevis GN=ccdc78 PE=2 SV=1
CCDC80	1.02407	0.599883	0.628389	1.14706	1.18298	0.982271	1.31994	1.28646	1.17114	1.23654	1.33506	1.5858	0.245513	0.283301	0.380211	0.74351	0.62941	0.61066	PREDICTED: coiled-coil domain-containing protein 80 [Pelodiscus sinensis]<>XP_014433118.1 PREDICTED: coiled-coil domain-containing protein 80 [Pelodiscus sinensis]	GO:0008201;GO:0005604;GO:0016337;GO:0001525;GO:0030198;GO:0001968;GO:0048870;GO:0010811;GO:0005539;GO:0005614;GO:0005578	heparin binding;basement membrane;single organismal cell-cell adhesion;angiogenesis;extracellular matrix organization;fibronectin binding;cell motility;positive regulation of cell-substrate adhesion;glycosaminoglycan binding;interstitial matrix;proteinaceous extracellular matrix	-	-	-	-	-	-	sp|Q8AXP2|CCD80_CHICK;gnl|BL_ORD_ID|322118	sp|Q8AXP2|CCD80_CHICK Coiled-coil domain-containing protein 80 OS=Gallus gallus GN=CCDC80 PE=2 SV=1;sp|Q8AXP2|CCD80_CHICK Coiled-coil domain-containing protein 80 OS=Gallus gallus GN=CCDC80 PE=2 SV=1
CCDC85C	0.670246	0.667453	0.513218	0.542825	0.766413	0.635484	1.04922	1.06707	0.880814	1.14768	1.01578	1.04532	0.472756	0.661813	0.494155	0.683947	0.639486	0.649335	PREDICTED: coiled-coil domain-containing protein 85C isoform X2 [Calidris pugnax];PREDICTED: coiled-coil domain-containing protein 85C isoform X1 [Pelodiscus sinensis];PREDICTED: coiled-coil domain-containing protein 85C isoform X2 [Pelodiscus sinensis]	GO:0021987;GO:0043296	cerebral cortex development;apical junction complex	-	-	-	-	-	KOG3819(S)(Uncharacterized conserved proteins (Hepatitis delta antigen-interacting protein A))	sp|Q0V989|CC85C_XENTR;sp|Q4V872|CC85C_XENLA;gnl|BL_ORD_ID|324647	sp|Q0V989|CC85C_XENTR Coiled-coil domain-containing protein 85C OS=Xenopus tropicalis GN=ccdc85c PE=2 SV=1;sp|Q4V872|CC85C_XENLA Coiled-coil domain-containing protein 85C OS=Xenopus laevis GN=ccdc85c PE=2 SV=1;sp|Q0V989|CC85C_XENTR Coiled-coil domain-containing protein 85C OS=Xenopus tropicalis GN=ccdc85c PE=2 SV=1
CCDC88A	0.62941	0.705008	0.621176	0.737987	0.705008	0.61066	0.70757	0.696356	0.716003	0.745075	0.786041	0.825426	0.287802	0.298853	0.269513	0.396199	0.419956	0.423246	PREDICTED: girdin isoform X7 [Pelodiscus sinensis];PREDICTED: girdin isoform X2 [Pelodiscus sinensis];PREDICTED: girdin isoform X5 [Pelodiscus sinensis];PREDICTED: girdin isoform X3 [Pelodiscus sinensis];PREDICTED: girdin isoform X1 [Pelodiscus sinensis]<>XP_014428602.1 PREDICTED: girdin isoform X1 [Pelodiscus sinensis];PREDICTED: girdin isoform X8 [Pelodiscus sinensis]<>XP_014428611.1 PREDICTED:…	-	-	-	-	-	-	-	KOG4643(S)(Uncharacterized coiled-coil protein)	gnl|BL_ORD_ID|20446;sp|Q3V6T2|GRDN_HUMAN	sp|Q3V6T2|GRDN_HUMAN Girdin OS=Homo sapiens GN=CCDC88A PE=1 SV=2;sp|Q3V6T2|GRDN_HUMAN Girdin OS=Homo sapiens GN=CCDC88A PE=1 SV=2
CCDC88B	0.546543	0.884795	1.07518	1.09412	1.10551	1.17551	0.471292	0.506505	0.694605	0.634477	0.561101	0.686636	0.78533	0.697229	0.79379	1.06446	1.02612	0.815578	PREDICTED: coiled-coil domain-containing protein 88B [Pelodiscus sinensis]	GO:0032956;GO:0003779;GO:0016477	regulation of actin cytoskeleton organization;actin binding;cell migration	-	-	-	-	-	KOG4643(S)(Uncharacterized coiled-coil protein)	sp|Q5SNZ0|GRDN_MOUSE;sp|A6NC98|CC88B_HUMAN;gnl|BL_ORD_ID|24896	sp|Q5SNZ0|GRDN_MOUSE Girdin OS=Mus musculus GN=Ccdc88a PE=1 SV=2;sp|A6NC98|CC88B_HUMAN Coiled-coil domain-containing protein 88B OS=Homo sapiens GN=CCDC88B PE=1 SV=1;sp|Q5SNZ0|GRDN_MOUSE Girdin OS=Mus musculus GN=Ccdc88a PE=1 SV=2
CCDC92	1.04999	1.13545	0.955207	0.678518	0.613842	0.711807	1.05881	1.06707	0.91698	0.881955	0.746634	0.905256	0.931966	1.05077	1.09061	0.810233	0.847573	0.727541	PREDICTED: coiled-coil domain-containing protein 92 [Pelodiscus sinensis]<>XP_014427303.1 PREDICTED: coiled-coil domain-containing protein 92 [Pelodiscus sinensis]	-	-	K16452	CCDC92	http://www.genome.jp/dbget-bin/www_bget?ko:K16452	-	-	-	sp|Q53HC0|CCD92_HUMAN;gnl|BL_ORD_ID|325797	sp|Q53HC0|CCD92_HUMAN Coiled-coil domain-containing protein 92 OS=Homo sapiens GN=CCDC92 PE=1 SV=2;sp|Q53HC0|CCD92_HUMAN Coiled-coil domain-containing protein 92 OS=Homo sapiens GN=CCDC92 PE=1 SV=2
CCNA2	1.18921	1.12024	1.03222	1.11694	0.949878	0.938019	0.883661	0.987219	1.00389	1.00689	1.02449	1.09061	0.334454	0.357935	0.382017	0.296665	0.485721	0.409933	PREDICTED: cyclin-A2 [Pelodiscus sinensis];PREDICTED: cyclin-A2 [Chelonia mydas]	-	-	K06627	CCNA	http://www.genome.jp/dbget-bin/www_bget?ko:K06627	Cell cycle;AMPK signaling pathway;Progesterone-mediated oocyte maturation	ko04110,ko04152,ko04914	KOG0653(D)(Cyclin B and related kinase-activating proteins)	gnl|BL_ORD_ID|326426;sp|P43449|CCNA2_CHICK	sp|P43449|CCNA2_CHICK Cyclin-A2 OS=Gallus gallus GN=CCNA2 PE=1 SV=1;sp|P43449|CCNA2_CHICK Cyclin-A2 OS=Gallus gallus GN=CCNA2 PE=1 SV=1
CCNB2	1.38075	1.29358	1.25551	1.47611	1.2615	1.37218	1.14208	1.27091	1.16346	1.22712	1.1364	1.24551	0.769377	0.862728	0.877947	0.721811	0.937518	0.833784	PREDICTED: G2/mitotic-specific cyclin-B2 [Pelodiscus sinensis]	GO:0043029;GO:0048538;GO:0040007;GO:0016020;GO:0015630;GO:0005634;GO:0005813	T cell homeostasis;thymus development;growth;membrane;microtubule cytoskeleton;nucleus;centrosome	K05868	CCNB	http://www.genome.jp/dbget-bin/www_bget?ko:K05868	Cell cycle;p53 signaling pathway;FoxO signaling pathway;Progesterone-mediated oocyte maturation	ko04110,ko04115,ko04068,ko04914	KOG0653(D)(Cyclin B and related kinase-activating proteins)	gnl|BL_ORD_ID|326431;sp|P29332|CCNB2_CHICK	sp|P29332|CCNB2_CHICK G2/mitotic-specific cyclin-B2 OS=Gallus gallus GN=CCNB2 PE=2 SV=1;sp|P29332|CCNB2_CHICK G2/mitotic-specific cyclin-B2 OS=Gallus gallus GN=CCNB2 PE=2 SV=1
CCND2	0.627366	0.414973	0.487138	0.670246	0.606381	0.456366	0.499687	0.531479	0.49693	0.501059	0.561101	0.487138	0.0791812	0.0681859	0.103804	0.184691	0.292256	0.170262	PREDICTED: G1/S-specific cyclin-D2 isoform X1 [Taeniopygia guttata]	GO:0005654;GO:0031965;GO:0045737;GO:0005730;GO:0051301;GO:0071481;GO:0019901;GO:0000307;GO:0005829;GO:1900087;GO:0008284;GO:0051726;GO:0000785;GO:0008344;GO:0043066;GO:0007616;GO:0001934;GO:0005634;GO:0097129;GO:0007049	nucleoplasm;nuclear membrane;positive regulation of cyclin-dependent protein serine/threonine kinase activity;nucleolus;cell division;cellular response to X-ray;protein kinase binding;cyclin-dependent protein kinase holoenzyme complex;cytosol;positive regulation of G1/S transition of mitotic cell cycle;positive regulation of cell proliferation;regulation of cell cycle;chromatin;adult locomotory b…	K10151	CCND2	http://www.genome.jp/dbget-bin/www_bget?ko:K10151	Cell cycle;p53 signaling pathway;Focal adhesion;FoxO signaling pathway;Hedgehog signaling pathway;Hippo signaling pathway;Jak-STAT signaling pathway;PI3K-Akt signaling pathway;Wnt signaling pathway;Prolactin signaling pathway	ko04110,ko04115,ko04510,ko04068,ko04340,ko04390,ko04630,ko04151,ko04310,ko04917	KOG0656(D)(G1/S-specific cyclin D)	gnl|BL_ORD_ID|325862	sp|P49706|CCND2_CHICK G1/S-specific cyclin-D2 OS=Gallus gallus GN=CCND2 PE=3 SV=1
CCNF	1.35564	1.14737	1.19396	1.43473	1.26623	1.36642	1.12254	1.09934	1.14426	1.11227	1.11428	1.19117	0.741939	0.69897	0.713491	0.644439	0.845718	0.765669	PREDICTED: cyclin-F [Pelodiscus sinensis]	GO:0019005;GO:0051726;GO:0000320;GO:0010826;GO:0016567;GO:0031146;GO:0005634;GO:0005814	SCF ubiquitin ligase complex;regulation of cell cycle;re-entry into mitotic cell cycle;negative regulation of centrosome duplication;protein ubiquitination;SCF-dependent proteasomal ubiquitin-dependent protein catabolic process;nucleus;centriole	K10289	CCNF,FBXO1	http://www.genome.jp/dbget-bin/www_bget?ko:K10289	-	-	KOG0654(D)(G2/Mitotic-specific cyclin A)	gnl|BL_ORD_ID|313881;sp|A5PK16|CCNF_BOVIN	sp|A5PK16|CCNF_BOVIN Cyclin-F OS=Bos taurus GN=CCNF PE=2 SV=1;sp|A5PK16|CCNF_BOVIN Cyclin-F OS=Bos taurus GN=CCNF PE=2 SV=1
CCNJ	0.811575	0.783904	0.786041	0.800029	0.808211	0.79588	0.775974	0.93044	0.930949	0.920645	0.904716	0.923762	0.472756	0.541579	0.394452	0.392697	0.487138	0.499687	PREDICTED: cyclin-J [Pelodiscus sinensis]	GO:0005634	nucleus	-	-	-	-	-	KOG0654(D)(G2/Mitotic-specific cyclin A)	gnl|BL_ORD_ID|313884;sp|Q5T5M9|CCNJ_HUMAN;sp|Q3TZI6|CCNJ_MOUSE	sp|Q3TZI6|CCNJ_MOUSE Cyclin-J OS=Mus musculus GN=Ccnj PE=2 SV=2;sp|Q5T5M9|CCNJ_HUMAN Cyclin-J OS=Homo sapiens GN=CCNJ PE=2 SV=2;sp|Q3TZI6|CCNJ_MOUSE Cyclin-J OS=Mus musculus GN=Ccnj PE=2 SV=2
CCNJL	0.729974	0.774517	0.798651	0.913814	0.770115	0.771587	0.755112	0.801404	0.819544	0.70927	0.728354	0.843233	0.352183	0.466868	0.260071	0.439333	0.463893	0.546543	cyclin-J-like protein [Amazona aestiva];cyclin-J-like protein isoform B [Alligator mississippiensis];PREDICTED: cyclin-J-like protein isoform X1 [Pelodiscus sinensis];PREDICTED: cyclin-J-like protein isoform X2 [Pelodiscus sinensis]<>XP_006137208.1 PREDICTED: cyclin-J-like protein isoform X2 [Pelodiscus sinensis]	-	-	-	-	-	-	-	KOG0653(D)(Cyclin B and related kinase-activating proteins)	sp|Q6DFJ9|CCNJ_XENLA;sp|Q5SRT8|CCNJL_MOUSE;gnl|BL_ORD_ID|326883;gnl|BL_ORD_ID|325868	sp|Q6DFJ9|CCNJ_XENLA Cyclin-J OS=Xenopus laevis GN=ccnj PE=2 SV=1;sp|Q5SRT8|CCNJL_MOUSE Cyclin-J-like protein OS=Mus musculus GN=Ccnjl PE=2 SV=1;sp|Q8IV13|CCNJL_HUMAN Cyclin-J-like protein OS=Homo sapiens GN=CCNJL PE=2 SV=3;sp|Q5SRT8|CCNJL_MOUSE Cyclin-J-like protein OS=Mus musculus GN=Ccnjl PE=2 SV=1
CD34	0.985426	0.482874	0.617	0.853698	0.989895	0.954243	0.925828	0.905256	0.912222	0.985426	0.940018	1.08207	0.434569	0.468347	0.583199	0.471292	0.453318	0.597695	PREDICTED: hematopoietic progenitor cell antigen CD34 [Pelodiscus sinensis]	GO:0009897;GO:0005737;GO:0072011;GO:0007160;GO:0048870;GO:0005886;GO:0045171;GO:0071971;GO:1900041;GO:0072089;GO:0045019;GO:0048471;GO:1901215;GO:0043199;GO:0032720;GO:0016021;GO:0030195;GO:0030246;GO:0016020;GO:0061042;GO:0005576;GO:0008134;GO:0071944;GO:0009986	external side of plasma membrane;cytoplasm;glomerular endothelium development;cell-matrix adhesion;cell motility;plasma membrane;intercellular bridge;extracellular exosome assembly;negative regulation of interleukin-2 secretion;stem cell proliferation;negative regulation of nitric oxide biosynthetic process;perinuclear region of cytoplasm;negative regulation of neuron death;sulfate binding;negati…	K06474	CD34	http://www.genome.jp/dbget-bin/www_bget?ko:K06474	Cell adhesion molecules (CAMs);Hematopoietic cell lineage	ko04514,ko04640	-	sp|Q64314|CD34_MOUSE;gnl|BL_ORD_ID|324441	sp|Q64314|CD34_MOUSE Hematopoietic progenitor cell antigen CD34 OS=Mus musculus GN=Cd34 PE=1 SV=1;sp|Q64314|CD34_MOUSE Hematopoietic progenitor cell antigen CD34 OS=Mus musculus GN=Cd34 PE=1 SV=1
CD44	0.816241	0.68842	0.489958	0.797268	0.670246	0.542825	0.793092	0.804139	0.784617	0.833147	0.83123	0.929419	0.969416	1.09342	1.18099	1.055	0.902003	0.970812	PREDICTED: CD44 antigen isoform X2 [Pelodiscus sinensis];PREDICTED: CD44 antigen isoform X10 [Pelodiscus sinensis];PREDICTED: CD44 antigen isoform X3 [Chrysemys picta bellii];PREDICTED: CD44 antigen isoform X2 [Chrysemys picta bellii];PREDICTED: CD44 antigen isoform X1 [Pelodiscus sinensis];PREDICTED: CD44 antigen isoform X7 [Pelodiscus sinensis];PREDICTED: CD44 antigen isoform X5 [Pelodiscus sin…	-	-	K06256	CD44	http://www.genome.jp/dbget-bin/www_bget?ko:K06256	ECM-receptor interaction;Hematopoietic cell lineage	ko04512,ko04640	-	gnl|BL_ORD_ID|326524;sp|Q28284|CD44_CANLF;sp|Q60522|CD44_MESAU;sp|Q05078|CD44_HORSE;sp|P26051|CD44_RAT;sp|P16070|CD44_HUMAN;sp|P14745|CD44_PAPHA;gnl|BL_ORD_ID|320611	sp|P16070|CD44_HUMAN CD44 antigen OS=Homo sapiens GN=CD44 PE=1 SV=3;sp|Q28284|CD44_CANLF CD44 antigen (Fragment) OS=Canis lupus familiaris GN=CD44 PE=2 SV=1;sp|Q60522|CD44_MESAU CD44 antigen OS=Mesocricetus auratus GN=CD44 PE=2 SV=1;sp|Q05078|CD44_HORSE CD44 antigen OS=Equus caballus GN=CD44 PE=2 SV=1;sp|P26051|CD44_RAT CD44 antigen OS=Rattus norvegicus GN=Cd44 PE=1 SV=2;sp|P16070|CD44_HUMAN CD44…
CDC14A	0.883661	0.884795	0.762679	0.613842	0.635484	0.673021	1.07482	0.978637	0.983626	1.0799	0.902547	0.968016	0.741939	0.884795	0.810233	0.812245	0.719331	0.843855	PREDICTED: dual specificity protein phosphatase CDC14A isoform X1 [Pelodiscus sinensis];PREDICTED: dual specificity protein phosphatase CDC14A isoform X2 [Pelodiscus sinensis]	-	-	K06639	CDC14	http://www.genome.jp/dbget-bin/www_bget?ko:K06639	Cell cycle;Cell cycle - yeast;Meiosis - yeast	ko04110,ko04111,ko04113	KOG2264(T)(Exostosin EXT1L);KOG1720(V)(Protein tyrosine phosphatase CDC14)	sp|Q9UNH5|CC14A_HUMAN;gnl|BL_ORD_ID|324631	sp|Q9UNH5|CC14A_HUMAN Dual specificity protein phosphatase CDC14A OS=Homo sapiens GN=CDC14A PE=1 SV=1;sp|Q9UNH5|CC14A_HUMAN Dual specificity protein phosphatase CDC14A OS=Homo sapiens GN=CDC14A PE=1 SV=1
CDC20B	1.60347	1.56086	1.75747	1.256	0.988559	1.5636	1.10551	1.17143	1.21085	1.08707	0.96426	1.19535	0.727541	0.475671	0.558709	0.754348	1.17638	0.91803	PREDICTED: cell division cycle protein 20 homolog B isoform X2 [Pelodiscus sinensis];PREDICTED: cell division cycle protein 20 homolog B isoform X1 [Pelodiscus sinensis];PREDICTED: cell division cycle protein 20 homolog B isoform X3 [Pelodiscus sinensis];PREDICTED: cell division cycle protein 20 homolog B isoform X4 [Pelodiscus sinensis]	GO:0010997;GO:0097027	anaphase-promoting complex binding;ubiquitin-protein transferase activator activity	-	-	-	-	-	KOG0305(DO)(Anaphase promoting complex, Cdc20, Cdh1, and Ama1 subunits)	sp|Q86Y33|CD20B_HUMAN;gnl|BL_ORD_ID|320593	sp|Q86Y33|CD20B_HUMAN Cell division cycle protein 20 homolog B OS=Homo sapiens GN=CDC20B PE=1 SV=3;sp|Q86Y33|CD20B_HUMAN Cell division cycle protein 20 homolog B OS=Homo sapiens GN=CDC20B PE=1 SV=3
CDC25A	0.980912	0.838849	0.759668	0.904716	0.843233	0.853698	0.729165	0.864511	0.830589	0.833784	0.798651	0.869818	0.357935	0.359835	0.437751	0.294466	0.509203	0.477121	PREDICTED: M-phase inducer phosphatase 1 [Pelodiscus sinensis]	GO:0005737;GO:0034644;GO:0005622;GO:0004725;GO:0019901;GO:0009314;GO:0006470;GO:0005634	cytoplasm;cellular response to UV;intracellular;protein tyrosine phosphatase activity;protein kinase binding;response to radiation;protein dephosphorylation;nucleus	K06645	CDC25A	http://www.genome.jp/dbget-bin/www_bget?ko:K06645	Cell cycle;Progesterone-mediated oocyte maturation	ko04110,ko04914	KOG3772(D)(M-phase inducer phosphatase)	gnl|BL_ORD_ID|94408;sp|P30304|MPIP1_HUMAN	sp|P30304|MPIP1_HUMAN M-phase inducer phosphatase 1 OS=Homo sapiens GN=CDC25A PE=1 SV=2;sp|P30304|MPIP1_HUMAN M-phase inducer phosphatase 1 OS=Homo sapiens GN=CDC25A PE=1 SV=2
CDC25C	1.26928	1.19033	1.07445	1.28623	1.17725	1.16879	0.836324	0.943989	0.899273	0.817565	0.880242	1.03623	0.575188	0.729974	0.665581	0.454845	0.746634	0.620136	PREDICTED: M-phase inducer phosphatase 3 isoform X2 [Pelodiscus sinensis];PREDICTED: M-phase inducer phosphatase 3 isoform X5 [Pelodiscus sinensis];PREDICTED: M-phase inducer phosphatase 3 isoform X3 [Pelodiscus sinensis];PREDICTED: M-phase inducer phosphatase 3 isoform X6 [Pelodiscus sinensis];PREDICTED: M-phase inducer phosphatase 3 isoform X4 [Pelodiscus sinensis];PREDICTED: M-phase inducer ph…	-	-	K05867	CDC25C	http://www.genome.jp/dbget-bin/www_bget?ko:K05867	Cell cycle;Oocyte meiosis;Progesterone-mediated oocyte maturation	ko04110,ko04114,ko04914	KOG3772(D)(M-phase inducer phosphatase)	sp|P30309|MPI1B_XENLA;gnl|BL_ORD_ID|94409;gnl|BL_ORD_ID|102859;sp|P48967|MPIP3_MOUSE	sp|P30309|MPI1B_XENLA M-phase inducer phosphatase 1-B OS=Xenopus laevis GN=cdc25-1-b PE=2 SV=1;sp|P48967|MPIP3_MOUSE M-phase inducer phosphatase 3 OS=Mus musculus GN=Cdc25c PE=2 SV=2;sp|P30309|MPI1B_XENLA M-phase inducer phosphatase 1-B OS=Xenopus laevis GN=cdc25-1-b PE=2 SV=1;sp|P48967|MPIP3_MOUSE M-phase inducer phosphatase 3 OS=Mus musculus GN=Cdc25c PE=2 SV=2
CDC42BPA	0.416641	0.392697	0.296665	0.357935	0.419956	0.334454	0.758912	0.670246	0.572872	0.797268	0.632457	0.815578	0.287802	0.332438	0.264818	0.332438	0.311754	0.31597	PREDICTED: serine/threonine-protein kinase MRCK alpha isoform X5 [Pelodiscus sinensis];PREDICTED: serine/threonine-protein kinase MRCK alpha isoform X3 [Pelodiscus sinensis];PREDICTED: serine/threonine-protein kinase MRCK alpha isoform X2 [Pelodiscus sinensis];PREDICTED: serine/threonine-protein kinase MRCK alpha isoform X4 [Pelodiscus sinensis];PREDICTED: serine/threonine-protein kinase MRCK alp…	GO:0004672;GO:0070062;GO:0042802;GO:0042641;GO:0000287;GO:0005524;GO:0031532;GO:0004674;GO:0016310;GO:0016301;GO:0016740;GO:0031032;GO:0000166;GO:0016477;GO:0006468;GO:0035556;GO:0046872	protein kinase activity;extracellular exosome;identical protein binding;actomyosin;magnesium ion binding;ATP binding;actin cytoskeleton reorganization;protein serine/threonine kinase activity;phosphorylation;kinase activity;transferase activity;actomyosin structure organization;nucleotide binding;cell migration;protein phosphorylation;intracellular signal transduction;metal ion binding	K16307	CDC42BP	http://www.genome.jp/dbget-bin/www_bget?ko:K16307	-	-	KOG0605(R)(NDR and related serine/threonine kinases);KOG0612(T)(Rho-associated, coiled-coil containing protein kinase)	sp|Q5VT25|MRCKA_HUMAN;gnl|BL_ORD_ID|103515	sp|Q5VT25|MRCKA_HUMAN Serine/threonine-protein kinase MRCK alpha OS=Homo sapiens GN=CDC42BPA PE=1 SV=1;sp|Q5VT25|MRCKA_HUMAN Serine/threonine-protein kinase MRCK alpha OS=Homo sapiens GN=CDC42BPA PE=1 SV=1
CDC42EP1	0.791691	0.357935	0.70927	1.08243	1.10175	0.910091	1.01995	0.931966	0.816904	0.948413	1.07151	1.11793	0.444045	0.419956	0.517196	0.633468	0.619093	0.588832	PREDICTED: cdc42 effector protein 1 [Pelodiscus sinensis]	-	-	-	-	-	-	-	-	sp|Q91W92|BORG5_MOUSE;gnl|BL_ORD_ID|303560	sp|Q91W92|BORG5_MOUSE Cdc42 effector protein 1 OS=Mus musculus GN=Cdc42ep1 PE=1 SV=1;sp|Q91W92|BORG5_MOUSE Cdc42 effector protein 1 OS=Mus musculus GN=Cdc42ep1 PE=1 SV=1
CDC6	0.899821	0.655138	0.805501	1.00604	0.912753	0.908485	0.716838	0.729974	0.828015	0.773055	0.744293	0.840106	0.403121	0.431364	0.501059	0.469822	0.591065	0.498311	PREDICTED: cell division control protein 6 homolog [Pelodiscus sinensis]	GO:0051233;GO:0005737;GO:0030071;GO:0005654;GO:0000922;GO:0005524;GO:0000166;GO:0051301;GO:0032467;GO:0006270;GO:0051984;GO:0019900;GO:0005634;GO:0005794	spindle midzone;cytoplasm;regulation of mitotic metaphase/anaphase transition;nucleoplasm;spindle pole;ATP binding;nucleotide binding;cell division;positive regulation of cytokinesis;DNA replication initiation;positive regulation of chromosome segregation;kinase binding;nucleus;Golgi apparatus	K02213	CDC6	http://www.genome.jp/dbget-bin/www_bget?ko:K02213	Cell cycle;Cell cycle - yeast;Meiosis - yeast	ko04110,ko04111,ko04113	KOG1514(L)(Origin recognition complex, subunit 1, and related proteins)	sp|Q99741|CDC6_HUMAN;gnl|BL_ORD_ID|323973	sp|Q99741|CDC6_HUMAN Cell division control protein 6 homolog OS=Homo sapiens GN=CDC6 PE=1 SV=1;sp|Q99741|CDC6_HUMAN Cell division control protein 6 homolog OS=Homo sapiens GN=CDC6 PE=1 SV=1
CDC7	1.18921	1.28443	1.25334	1.17056	1.00561	1.20303	0.851258	0.95376	1.02653	0.97359	0.907949	1.01284	0.627366	0.361728	0.477121	0.50515	0.677607	0.658965	PREDICTED: cell division cycle 7-related protein kinase isoform X2 [Pelodiscus sinensis];PREDICTED: cell division cycle 7-related protein kinase isoform X1 [Pelodiscus sinensis]	GO:0005737;GO:0004672;GO:0005654;GO:0044770;GO:0005524;GO:0045171;GO:0010571;GO:0004674;GO:0016301;GO:0008284;GO:0000166;GO:0015630;GO:0006468;GO:0005634;GO:0010971	cytoplasm;protein kinase activity;nucleoplasm;cell cycle phase transition;ATP binding;intercellular bridge;positive regulation of nuclear cell cycle DNA replication;protein serine/threonine kinase activity;kinase activity;positive regulation of cell proliferation;nucleotide binding;microtubule cytoskeleton;protein phosphorylation;nucleus;positive regulation of G2/M transition of mitotic cell cycle	K02214	CDC7	http://www.genome.jp/dbget-bin/www_bget?ko:K02214	Cell cycle;Cell cycle - yeast;Meiosis - yeast	ko04110,ko04111,ko04113	KOG1167(L)(Serine/threonine protein kinase of the CDC7 subfamily involved in DNA synthesis, repair and recombination);KOG0583(T)(Serine/threonine protein kinase)	sp|O00311|CDC7_HUMAN;gnl|BL_ORD_ID|323975	sp|O00311|CDC7_HUMAN Cell division cycle 7-related protein kinase OS=Homo sapiens GN=CDC7 PE=1 SV=1;sp|O00311|CDC7_HUMAN Cell division cycle 7-related protein kinase OS=Homo sapiens GN=CDC7 PE=1 SV=1
CDCA2	1.07262	1.02979	0.979548	0.980912	0.889302	0.967548	0.897627	1.03423	0.948413	0.965672	0.957128	1.12189	0.436163	0.510545	0.457882	0.350248	0.622214	0.539076	PREDICTED: cell division cycle-associated protein 2 isoform X2 [Pelodiscus sinensis];PREDICTED: cell division cycle-associated protein 2 isoform X1 [Pelodiscus sinensis]<>XP_006114248.1 PREDICTED: cell division cycle-associated protein 2 isoform X1 [Pelodiscus sinensis]	-	-	K17590	CDCA2	http://www.genome.jp/dbget-bin/www_bget?ko:K17590	-	-	-	gnl|BL_ORD_ID|325929;sp|Q69YH5|CDCA2_HUMAN	sp|Q69YH5|CDCA2_HUMAN Cell division cycle-associated protein 2 OS=Homo sapiens GN=CDCA2 PE=1 SV=2;sp|Q69YH5|CDCA2_HUMAN Cell division cycle-associated protein 2 OS=Homo sapiens GN=CDCA2 PE=1 SV=2
CDCA5	1.36474	1.35583	1.33264	1.48202	1.25696	1.45864	1.1284	1.34025	1.34143	1.19201	1.256	1.29159	0.825426	0.608526	0.763428	0.582063	0.818226	0.801404	PREDICTED: sororin [Pelodiscus sinensis]	-	-	K17390	CDCA5	http://www.genome.jp/dbget-bin/www_bget?ko:K17390	-	-	-	sp|Q563C3|CCA5A_XENLA;gnl|BL_ORD_ID|312863	sp|Q563C3|CCA5A_XENLA Sororin OS=Xenopus laevis GN=cdca5-a PE=1 SV=1;sp|Q563C3|CCA5A_XENLA Sororin OS=Xenopus laevis GN=cdca5-a PE=1 SV=1
CDCA7	0.977266	0.945961	0.886491	0.925828	0.85309	0.893207	0.695482	0.913284	0.937016	0.877947	0.80618	0.955688	0.460898	0.389166	0.4133	0.346353	0.598791	0.50515	Cell division cycle-associated protein 7 [Chelonia mydas];PREDICTED: LOW QUALITY PROTEIN: cell division cycle-associated protein 7 [Pelodiscus sinensis]	-	-	-	-	-	-	-	-	gnl|BL_ORD_ID|325930;sp|Q32PH1|CDCA7_BOVIN;sp|Q9BWT1|CDCA7_HUMAN	sp|Q32PH1|CDCA7_BOVIN Cell division cycle-associated protein 7 OS=Bos taurus GN=CDCA7 PE=2 SV=1;sp|Q32PH1|CDCA7_BOVIN Cell division cycle-associated protein 7 OS=Bos taurus GN=CDCA7 PE=2 SV=1;sp|Q9BWT1|CDCA7_HUMAN Cell division cycle-associated protein 7 OS=Homo sapiens GN=CDCA7 PE=1 SV=1
CDH5	0.727541	0.41162	0.485721	0.606381	0.705008	0.597695	0.713491	0.85248	0.794488	0.850646	0.770852	1.08529	0.187521	0.20412	0.269513	0.363612	0.30103	0.269513	PREDICTED: cadherin-5 isoform X1 [Pelodiscus sinensis];PREDICTED: cadherin-5 isoform X2 [Pelodiscus sinensis]	GO:0009897;GO:0019903;GO:0008285;GO:0007155;GO:0005886;GO:2000114;GO:0005509;GO:0030054;GO:0005102;GO:0005911;GO:0007179;GO:0016021;GO:1903142;GO:0001955;GO:0044325;GO:0016020;GO:0016337;GO:0007156;GO:0008013;GO:0071944;GO:0005912;GO:0007043;GO:0005923;GO:0009986	external side of plasma membrane;protein phosphatase binding;negative regulation of cell proliferation;cell adhesion;plasma membrane;regulation of establishment of cell polarity;calcium ion binding;cell junction;receptor binding;cell-cell junction;transforming growth factor beta receptor signaling pathway;integral component of membrane;positive regulation of establishment of endothelial barrier;b…	K06533	CDH5	http://www.genome.jp/dbget-bin/www_bget?ko:K06533	Cell adhesion molecules (CAMs);Leukocyte transendothelial migration	ko04514,ko04670	-	gnl|BL_ORD_ID|306538	sp|Q8AYD0|CADH5_CHICK Cadherin-5 OS=Gallus gallus GN=CDH5 PE=1 SV=2
CDH6	0.862728	0.89098	0.992554	0.782473	0.907949	0.770852	1.33526	1.13066	1.07846	1.276	1.14891	1.14613	0.741152	1.01787	0.858537	0.740363	0.979093	1.01452	PREDICTED: cadherin-6 [Pelodiscus sinensis]	GO:0016020;GO:0007155;GO:0007156;GO:0005886;GO:0005509;GO:0016021	membrane;cell adhesion;homophilic cell adhesion via plasma membrane adhesion molecules;plasma membrane;calcium ion binding;integral component of membrane	K06798	CDH6	http://www.genome.jp/dbget-bin/www_bget?ko:K06798	-	-	-	sp|Q90762|CADH6_CHICK;gnl|BL_ORD_ID|307924	sp|Q90762|CADH6_CHICK Cadherin-6 OS=Gallus gallus GN=CDH6 PE=2 SV=1;sp|Q90762|CADH6_CHICK Cadherin-6 OS=Gallus gallus GN=CDH6 PE=2 SV=1
CDH7	0.471292	0.320146	0.334454	0.704151	0.647383	0.456366	0.826075	0.740363	0.571709	0.719331	0.750508	0.85309	0.220108	0.161368	0.120574	0.10721	0.0827854	0.149219	PREDICTED: cadherin-7 [Pelodiscus sinensis]	GO:0007155;GO:0005886;GO:0005509;GO:0016021;GO:0016020;GO:0007156	cell adhesion;plasma membrane;calcium ion binding;integral component of membrane;membrane;homophilic cell adhesion via plasma membrane adhesion molecules	K06799	CDH7	http://www.genome.jp/dbget-bin/www_bget?ko:K06799	-	-	-	gnl|BL_ORD_ID|306540;sp|Q90763|CADH7_CHICK;sp|Q9ULB5|CADH7_HUMAN	sp|Q90763|CADH7_CHICK Cadherin-7 OS=Gallus gallus GN=CDH7 PE=2 SV=1;sp|Q90763|CADH7_CHICK Cadherin-7 OS=Gallus gallus GN=CDH7 PE=2 SV=1;sp|Q9ULB5|CADH7_HUMAN Cadherin-7 OS=Homo sapiens GN=CDH7 PE=2 SV=2
CDK2	1.07115	0.988559	0.946452	1.15957	1.25888	1.11594	1.09167	1.16524	1.20548	1.15927	1.1186	1.22376	0.668386	0.663701	0.660865	0.525045	0.718502	0.821514	PREDICTED: cyclin-dependent kinase 2 [Pelodiscus sinensis]	GO:0005737;GO:0097124;GO:0004672;GO:0030332;GO:0097134;GO:0018105;GO:0005524;GO:0000805;GO:0045893;GO:0000122;GO:0051591;GO:0097135;GO:0032869;GO:0004674;GO:0051301;GO:0016310;GO:0015030;GO:0005856;GO:0016301;GO:0005768;GO:0060968;GO:0010389;GO:0007275;GO:0016740;GO:0051602;GO:0000307;GO:0035173;GO:0010033;GO:0005829;GO:0005667;GO:0006974;GO:0032298;GO:0032403;GO:0008284;GO:0000781;GO:0007067;GO:…	cytoplasm;cyclin A2-CDK2 complex;protein kinase activity;cyclin binding;cyclin E1-CDK2 complex;peptidyl-serine phosphorylation;ATP binding;X chromosome;positive regulation of transcription, DNA-templated;negative regulation of transcription from RNA polymerase II promoter;response to cAMP;cyclin E2-CDK2 complex;cellular response to insulin stimulus;protein serine/threonine kinase activity;cell di…	K02206	CDK2	http://www.genome.jp/dbget-bin/www_bget?ko:K02206	Cell cycle;Oocyte meiosis;p53 signaling pathway;FoxO signaling pathway;PI3K-Akt signaling pathway;Progesterone-mediated oocyte maturation	ko04110,ko04114,ko04115,ko04068,ko04151,ko04914	KOG0662(UT)(Cyclin-dependent kinase CDK5)	gnl|BL_ORD_ID|325970;sp|P97377|CDK2_MOUSE;sp|O55076|CDK2_CRIGR	sp|O55076|CDK2_CRIGR Cyclin-dependent kinase 2 OS=Cricetulus griseus GN=CDK2 PE=2 SV=1;sp|P97377|CDK2_MOUSE Cyclin-dependent kinase 2 OS=Mus musculus GN=Cdk2 PE=1 SV=2;sp|O55076|CDK2_CRIGR Cyclin-dependent kinase 2 OS=Cricetulus griseus GN=CDK2 PE=2 SV=1
CDK5RAP2	1.04844	1.12254	1.00389	1.06221	0.981819	0.941511	1.0162	0.973128	1.00518	1.01828	0.995196	1.05767	0.620136	0.582063	0.580925	0.679428	0.745855	0.646404	PREDICTED: CDK5 regulatory subunit-associated protein 2 isoform X5 [Pelodiscus sinensis];PREDICTED: CDK5 regulatory subunit-associated protein 2 isoform X2 [Pelodiscus sinensis];PREDICTED: CDK5 regulatory subunit-associated protein 2 isoform X4 [Pelodiscus sinensis];PREDICTED: CDK5 regulatory subunit-associated protein 2 isoform X1 [Pelodiscus sinensis];PREDICTED: CDK5 regulatory subunit-associat…	GO:0005737;GO:0007420;GO:0070062;GO:0000922;GO:0007059;GO:0045893;GO:0015631;GO:0005516;GO:0000226;GO:0097431;GO:0045665;GO:0030054;GO:0019901;GO:0051297;GO:0008017;GO:0048471;GO:0001578;GO:0000132;GO:0022008;GO:0044212;GO:0090231;GO:0005874;GO:0000242;GO:0005815;GO:0005813	cytoplasm;brain development;extracellular exosome;spindle pole;chromosome segregation;positive regulation of transcription, DNA-templated;tubulin binding;calmodulin binding;microtubule cytoskeleton organization;mitotic spindle pole;negative regulation of neuron differentiation;cell junction;protein kinase binding;centrosome cycle;microtubule binding;perinuclear region of cytoplasm;microtubule bun…	K16542	CDK5RAP2	http://www.genome.jp/dbget-bin/www_bget?ko:K16542	-	-	KOG0994(W)(Extracellular matrix glycoprotein Laminin subunit beta)	gnl|BL_ORD_ID|330969;gnl|BL_ORD_ID|335621;sp|Q19UN5|CK5P2_PANTR	sp|Q19UN5|CK5P2_PANTR CDK5 regulatory subunit-associated protein 2 OS=Pan troglodytes GN=CDK5RAP2 PE=2 SV=1;sp|Q96SN8|CK5P2_HUMAN CDK5 regulatory subunit-associated protein 2 OS=Homo sapiens GN=CDK5RAP2 PE=1 SV=5;sp|Q19UN5|CK5P2_PANTR CDK5 regulatory subunit-associated protein 2 OS=Pan troglodytes GN=CDK5RAP2 PE=2 SV=1
CDKL2	0.993436	1.07628	0.904174	0.733197	0.816904	0.863323	1.01199	0.910624	1.04179	1.0013	0.937518	1.00561	0.990783	0.960471	0.984977	0.95376	0.973128	0.890421	PREDICTED: cyclin-dependent kinase-like 2 isoform X1 [Pelodiscus sinensis]	GO:0004672;GO:0005524;GO:0004674;GO:0016310;GO:0016301;GO:0000166;GO:0006468	protein kinase activity;ATP binding;protein serine/threonine kinase activity;phosphorylation;kinase activity;nucleotide binding;protein phosphorylation	K08824	CDKL	http://www.genome.jp/dbget-bin/www_bget?ko:K08824	-	-	KOG0594(R)(Protein kinase PCTAIRE and related kinases)	sp|Q5R754|CDKL2_PONAB;sp|Q9TTK0|CDKL2_RABIT;gnl|BL_ORD_ID|327326	sp|Q5R754|CDKL2_PONAB Cyclin-dependent kinase-like 2 OS=Pongo abelii GN=CDKL2 PE=2 SV=1;sp|Q9TTK0|CDKL2_RABIT Cyclin-dependent kinase-like 2 OS=Oryctolagus cuniculus GN=CDKL2 PE=2 SV=1;sp|Q9TTK0|CDKL2_RABIT Cyclin-dependent kinase-like 2 OS=Oryctolagus cuniculus GN=CDKL2 PE=2 SV=1
CDO1	0.480007	0.494155	0.588832	0.624282	0.526339	0.378398	0.553883	0.657056	0.622214	0.617	0.528917	0.659916	0.979548	0.862131	0.78533	1.13704	0.87564	0.80618	PREDICTED: cysteine dioxygenase type 1 isoform X2 [Pelodiscus sinensis];PREDICTED: cysteine dioxygenase type 1 isoform X1 [Pelodiscus sinensis]	GO:0000097;GO:0019451;GO:0005506;GO:0042412;GO:0017172;GO:0005829;GO:0016702;GO:0055114;GO:0046872	sulfur amino acid biosynthetic process;L-cysteine catabolic process to pyruvate, using cysteine dioxygenase;iron ion binding;taurine biosynthetic process;cysteine dioxygenase activity;cytosol;oxidoreductase activity, acting on single donors with incorporation of molecular oxygen, incorporation of two atoms of oxygen;oxidation-reduction process;metal ion binding	K00456	CDO1	http://www.genome.jp/dbget-bin/www_bget?ko:K00456	Cysteine and methionine metabolism;Taurine and hypotaurine metabolism	ko00270,ko00430	-	sp|Q5RBQ7|CDO1_PONAB;sp|Q16878|CDO1_HUMAN;gnl|BL_ORD_ID|328458;gnl|BL_ORD_ID|335852	sp|Q5RBQ7|CDO1_PONAB Cysteine dioxygenase type 1 OS=Pongo abelii GN=CDO1 PE=2 SV=1;sp|Q16878|CDO1_HUMAN Cysteine dioxygenase type 1 OS=Homo sapiens GN=CDO1 PE=1 SV=2;sp|Q16878|CDO1_HUMAN Cysteine dioxygenase type 1 OS=Homo sapiens GN=CDO1 PE=1 SV=2;sp|Q5RBQ7|CDO1_PONAB Cysteine dioxygenase type 1 OS=Pongo abelii GN=CDO1 PE=2 SV=1
CDT1	1.03383	0.833784	0.894316	1.34479	1.29137	1.25358	1.13513	1.11025	1.17754	1.04139	1.07555	1.17898	0.729974	0.773786	0.923762	0.564666	0.752048	0.778874	PREDICTED: DNA replication factor Cdt1 [Pelodiscus sinensis]	GO:0003677;GO:0000076;GO:0030174;GO:0033262;GO:0005634	DNA binding;DNA replication checkpoint;regulation of DNA-dependent DNA replication initiation;regulation of nuclear cell cycle DNA replication;nucleus	K10727	CDT1	http://www.genome.jp/dbget-bin/www_bget?ko:K10727	-	-	KOG4762(L)(DNA replication factor)	gnl|BL_ORD_ID|327027;sp|Q9I9A7|CDT1_XENLA	sp|Q9I9A7|CDT1_XENLA DNA replication factor Cdt1 OS=Xenopus laevis GN=cdt1 PE=1 SV=2;sp|Q9I9A7|CDT1_XENLA DNA replication factor Cdt1 OS=Xenopus laevis GN=cdt1 PE=1 SV=2
CEBPB	0.209515	0.424882	0.352183	0.380211	0.305351	0.390935	0.423246	0.348305	0.30963	0.603144	0.669317	0.586587	0.894316	1.03503	0.924279	0.882525	0.623249	0.933993	PREDICTED: CCAAT/enhancer-binding protein beta, partial [Pelodiscus sinensis]	GO:0005737;GO:0003705;GO:0005654;GO:0042826;GO:0002432;GO:0003677;GO:2000617;GO:0072574;GO:0045670;GO:0001077;GO:0045892;GO:0043524;GO:0046982;GO:0032496;GO:0016363;GO:0032753;GO:0000790;GO:0045944;GO:0050873;GO:0000779;GO:0043565;GO:0045408;GO:0006351;GO:0042803;GO:0035035;GO:0001158;GO:0003700;GO:0006355;GO:0019900;GO:0005634;GO:0044389	cytoplasm;transcription factor activity, RNA polymerase II distal enhancer sequence-specific binding;nucleoplasm;histone deacetylase binding;granuloma formation;DNA binding;positive regulation of histone H3-K9 acetylation;hepatocyte proliferation;regulation of osteoclast differentiation;transcriptional activator activity, RNA polymerase II core promoter proximal region sequence-specific binding;n…	K10048	CEBPB	http://www.genome.jp/dbget-bin/www_bget?ko:K10048	TNF signaling pathway;IL-17 signaling pathway	ko04668,ko04657	-	gnl|BL_ORD_ID|324551	sp|Q05826|CEBPB_CHICK CCAAT/enhancer-binding protein beta OS=Gallus gallus GN=CEBPB PE=1 SV=1
CECR2	0.555094	0.414973	0.385606	0.547775	0.599883	0.521138	0.61066	0.600973	0.596597	0.614897	0.68842	0.705864	0.161368	0.170262	0.120574	0.303196	0.307496	0.274158	PREDICTED: cat eye syndrome critical region protein 2 [Pelodiscus sinensis]	-	-	-	-	-	-	-	KOG1472(BK)(Histone acetyltransferase SAGA/ADA, catalytic subunit PCAF/GCN5 and related proteins);KOG1245(B)(Chromatin remodeling complex WSTF-ISWI, large subunit (contains heterochromatin localization, PHD and BROMO domains))	sp|Q9BXF3|CECR2_HUMAN;gnl|BL_ORD_ID|323622	sp|Q9BXF3|CECR2_HUMAN Cat eye syndrome critical region protein 2 OS=Homo sapiens GN=CECR2 PE=1 SV=2;sp|Q9BXF3|CECR2_HUMAN Cat eye syndrome critical region protein 2 OS=Homo sapiens GN=CECR2 PE=1 SV=2
CECR5	0.87564	0.808886	0.68842	0.733197	0.870989	0.641474	1.22608	1.14019	1.0607	1.22246	1.10721	1.17377	0.778151	1.00389	0.731589	0.847573	0.780317	0.889862	PREDICTED: cat eye syndrome critical region protein 5 [Pelodiscus sinensis]	-	-	-	-	-	-	-	KOG1618(R)(Predicted phosphatase)	gnl|BL_ORD_ID|325037	sp|Q91WM2|CECR5_MOUSE Cat eye syndrome critical region protein 5 homolog OS=Mus musculus GN=Cecr5 PE=1 SV=1
CELF2	0.39794	0.549003	0.424882	0.392697	0.495544	0.495544	0.739572	0.758912	0.695482	0.835056	0.670246	0.78533	0.376577	0.481443	0.383815	0.383815	0.39794	0.382017	PREDICTED: CUGBP Elav-like family member 2 isoform X14 [Anolis carolinensis];PREDICTED: CUGBP Elav-like family member 2 isoform X4 [Zonotrichia albicollis]<>XP_017595853.1 PREDICTED: CUGBP Elav-like family member 2 isoform X7 [Corvus brachyrhynchos]<>XP_017663239.1 PREDICTED: CUGBP Elav-like family member 2 isoform X7 [Lepidothrix coronata]<>XP_017923643.1 PREDICTED: CUGBP Elav-like family member…	GO:0005737;GO:0006396;GO:0044822;GO:0003723;GO:0000166;GO:0006397;GO:0003676;GO:0006376;GO:0008016;GO:0005634	cytoplasm;RNA processing;RNA binding;RNA binding;nucleotide binding;mRNA processing;nucleic acid binding;mRNA splice site selection;regulation of heart contraction;nucleus	K13207	CUGBP,BRUNOL,CELF	http://www.genome.jp/dbget-bin/www_bget?ko:K13207	-	-	KOG0144(A)(RNA-binding protein CUGBP1/BRUNO (RRM superfamily))	gnl|BL_ORD_ID|324061;sp|Q792H5|CELF2_RAT;sp|Q7ZXE2|CELF2_XENLA;sp|Q5R8Y8|CELF2_PONAB;sp|Q9Z0H4|CELF2_MOUSE;sp|O95319|CELF2_HUMAN;sp|Q6P0B1|CELF2_DANRE;gnl|BL_ORD_ID|323078;gnl|BL_ORD_ID|327364;gnl|BL_ORD_ID|324951;sp|A4IIM2|CELF2_XENTR	sp|Q7ZXE2|CELF2_XENLA CUGBP Elav-like family member 2 OS=Xenopus laevis GN=celf2 PE=1 SV=1;sp|Q792H5|CELF2_RAT CUGBP Elav-like family member 2 OS=Rattus norvegicus GN=Celf2 PE=2 SV=1;sp|Q7ZXE2|CELF2_XENLA CUGBP Elav-like family member 2 OS=Xenopus laevis GN=celf2 PE=1 SV=1;sp|Q5R8Y8|CELF2_PONAB CUGBP Elav-like family member 2 OS=Pongo abelii GN=CELF2 PE=2 SV=2;sp|Q9Z0H4|CELF2_MOUSE CUGBP Elav-lik…
CELSR3	0.399674	0.40654	0.359835	0.599883	0.437751	0.401401	0.376577	0.31597	0.376577	0.350248	0.409933	0.44248	0.0827854	0.298853	0.117271	0.120574	0.173186	0.1959	PREDICTED: cadherin EGF LAG seven-pass G-type receptor 3 [Pelodiscus sinensis]	GO:0036515;GO:0007166;GO:0007155;GO:0005886;GO:0007413;GO:0005509;GO:0004888;GO:0032880;GO:0016021;GO:0007186;GO:0016020;GO:0004871;GO:0007165;GO:0001764;GO:0007156;GO:0004930;GO:0001932	serotonergic neuron axon guidance;cell surface receptor signaling pathway;cell adhesion;plasma membrane;axonal fasciculation;calcium ion binding;transmembrane signaling receptor activity;regulation of protein localization;integral component of membrane;G-protein coupled receptor signaling pathway;membrane;signal transducer activity;signal transduction;neuron migration;homophilic cell adhesion via…	K04602	CELSR3	http://www.genome.jp/dbget-bin/www_bget?ko:K04602	-	-	KOG1217(T)(Fibrillins and related proteins containing Ca2+-binding EGF-like domains);KOG4289(T)(Cadherin EGF LAG seven-pass G-type receptor)	gnl|BL_ORD_ID|323643;sp|Q9NYQ7|CELR3_HUMAN	sp|Q9NYQ7|CELR3_HUMAN Cadherin EGF LAG seven-pass G-type receptor 3 OS=Homo sapiens GN=CELSR3 PE=1 SV=2;sp|Q9NYQ7|CELR3_HUMAN Cadherin EGF LAG seven-pass G-type receptor 3 OS=Homo sapiens GN=CELSR3 PE=1 SV=2
CENPE	1.12418	1.10823	1.05385	1.12905	0.992554	0.989895	0.850033	0.970812	1.00775	0.929419	0.808886	1.02653	0.429752	0.474216	0.506505	0.424882	0.58995	0.523746	PREDICTED: centromere-associated protein E [Pelodiscus sinensis]	-	-	K11498	CENPE	http://www.genome.jp/dbget-bin/www_bget?ko:K11498	-	-	KOG4280(Z)(Kinesin-like protein)	sp|Q02224|CENPE_HUMAN;gnl|BL_ORD_ID|324601	sp|Q02224|CENPE_HUMAN Centromere-associated protein E OS=Homo sapiens GN=CENPE PE=1 SV=2;sp|Q02224|CENPE_HUMAN Centromere-associated protein E OS=Homo sapiens GN=CENPE PE=1 SV=2
CENPI	1.08135	1.05423	1.01242	0.986772	0.920123	0.897077	0.870989	0.960471	0.968016	1.0013	0.892651	1.06521	0.553883	0.431364	0.453318	0.371068	0.667453	0.537819	PREDICTED: centromere protein I [Pelodiscus sinensis]<>XP_006137501.1 PREDICTED: centromere protein I [Pelodiscus sinensis]	GO:0000776;GO:0034508	kinetochore;centromere complex assembly	K11501	CENPI	http://www.genome.jp/dbget-bin/www_bget?ko:K11501	-	-	-	sp|Q8AYS7|CENPI_CHICK;gnl|BL_ORD_ID|327933	sp|Q8AYS7|CENPI_CHICK Centromere protein I OS=Gallus gallus GN=CENPI PE=1 SV=1;sp|Q8AYS7|CENPI_CHICK Centromere protein I OS=Gallus gallus GN=CENPI PE=1 SV=1
CENPJ	0.641474	0.691081	0.598791	0.622214	0.556303	0.574031	0.450249	0.439333	0.510545	0.463893	0.424882	0.454845	0.278754	0.20412	0.1959	0.255273	0.274158	0.313867	PREDICTED: centromere protein J isoform X3 [Pelodiscus sinensis]<>XP_014426051.1 PREDICTED: centromere protein J isoform X4 [Pelodiscus sinensis];PREDICTED: centromere protein J isoform X2 [Pelodiscus sinensis];PREDICTED: centromere protein J isoform X1 [Pelodiscus sinensis]<>XP_014426046.1 PREDICTED: centromere protein J isoform X1 [Pelodiscus sinensis]<>XP_014426047.1 PREDICTED: centromere prot…	-	-	K11502	CENPJ	http://www.genome.jp/dbget-bin/www_bget?ko:K11502	-	-	-	gnl|BL_ORD_ID|324964;sp|Q9HC77|CENPJ_HUMAN	sp|Q9HC77|CENPJ_HUMAN Centromere protein J OS=Homo sapiens GN=CENPJ PE=1 SV=2;sp|Q9HC77|CENPJ_HUMAN Centromere protein J OS=Homo sapiens GN=CENPJ PE=1 SV=2
CENPK	1.32695	1.32449	1.26576	1.23629	1.1014	1.15106	1.07225	1.15473	1.04376	0.960946	1.08814	1.12483	0.650308	0.779596	0.609594	0.621176	0.698101	0.680336	PREDICTED: centromere protein K isoform X1 [Pelodiscus sinensis];PREDICTED: centromere protein K isoform X2 [Pelodiscus sinensis]	GO:0005634	nucleus	K11503	CENPK	http://www.genome.jp/dbget-bin/www_bget?ko:K11503	-	-	-	sp|Q5XGL1|CENPK_XENLA;gnl|BL_ORD_ID|323671	sp|Q5XGL1|CENPK_XENLA Centromere protein K OS=Xenopus laevis GN=cenpk PE=2 SV=2;sp|Q5XGL1|CENPK_XENLA Centromere protein K OS=Xenopus laevis GN=cenpk PE=2 SV=2
CENPM	1.31197	1.24822	1.24822	1.29885	1.20249	1.21112	1.12678	1.25115	1.22557	1.1726	1.2398	1.24674	0.730782	0.775974	0.793092	0.605305	0.858537	0.85187	PREDICTED: centromere protein M isoform X2 [Pelodiscus sinensis];PREDICTED: centromere protein M isoform X1 [Pelodiscus sinensis]	-	-	K11505	CENPM	http://www.genome.jp/dbget-bin/www_bget?ko:K11505	-	-	-	sp|Q1T7B9|CENPM_CHICK;gnl|BL_ORD_ID|324965	sp|Q1T7B9|CENPM_CHICK Centromere protein M OS=Gallus gallus GN=CENPM PE=1 SV=1;sp|Q1T7B9|CENPM_CHICK Centromere protein M OS=Gallus gallus GN=CENPM PE=1 SV=1
CENPN	1.08743	1.14208	1.05881	1.09377	0.994317	1.10517	1.02694	1.11992	1.0693	1.05231	0.978637	1.18554	0.55145	0.678518	0.679428	0.523746	0.692847	0.654177	PREDICTED: centromere protein N isoform X1 [Pelodiscus sinensis]<>XP_006122736.1 PREDICTED: centromere protein N isoform X2 [Pelodiscus sinensis];PREDICTED: centromere protein N isoform X3 [Pelodiscus sinensis]	GO:0007059;GO:0034508;GO:0000775;GO:0007067	chromosome segregation;centromere complex assembly;chromosome, centromeric region;mitotic cell cycle	K11506	CENPN	http://www.genome.jp/dbget-bin/www_bget?ko:K11506	-	-	-	gnl|BL_ORD_ID|324605;sp|Q1T765|CENPN_CHICK	sp|Q1T765|CENPN_CHICK Centromere protein N OS=Gallus gallus GN=CENPN PE=2 SV=1;sp|Q1T765|CENPN_CHICK Centromere protein N OS=Gallus gallus GN=CENPN PE=2 SV=1
CENPU	1.07518	1.1038	1.11826	1.04297	0.92737	0.901458	0.910091	0.836324	0.893762	0.896526	0.726727	0.933487	0.311754	0.352183	0.462398	0.429752	0.436163	0.491362	PREDICTED: centromere protein U isoform X3 [Pelodiscus sinensis];PREDICTED: centromere protein U isoform X2 [Pelodiscus sinensis];PREDICTED: centromere protein U isoform X1 [Pelodiscus sinensis]	-	-	K11513	MLF1IP,CENPU	http://www.genome.jp/dbget-bin/www_bget?ko:K11513	-	-	-	gnl|BL_ORD_ID|327936;sp|Q2Z1W2|CENPU_CHICK	sp|Q2Z1W2|CENPU_CHICK Centromere protein U OS=Gallus gallus GN=CENPU PE=1 SV=1;sp|Q2Z1W2|CENPU_CHICK Centromere protein U OS=Gallus gallus GN=CENPU PE=1 SV=1
CEP170	1.01284	1.1014	1.13735	1.19618	1.02449	1.077	0.909021	0.931966	1.05385	0.899821	0.952308	1.00988	0.550228	0.68842	0.5302	0.729165	0.793092	0.666518	PREDICTED: centrosomal protein of 170 kDa isoform X6 [Pelodiscus sinensis];PREDICTED: centrosomal protein of 170 kDa isoform X9 [Pelodiscus sinensis];PREDICTED: centrosomal protein of 170 kDa isoform X10 [Pelodiscus sinensis];PREDICTED: centrosomal protein of 170 kDa isoform X5 [Pelodiscus sinensis];PREDICTED: centrosomal protein of 170 kDa isoform X4 [Pelodiscus sinensis];PREDICTED: centrosomal …	-	-	K16463	CEP170	http://www.genome.jp/dbget-bin/www_bget?ko:K16463	-	-	-	gnl|BL_ORD_ID|320738;sp|Q5SW79|CE170_HUMAN;sp|Q6A065|CE170_MOUSE;gnl|BL_ORD_ID|335904	sp|Q5SW79|CE170_HUMAN Centrosomal protein of 170 kDa OS=Homo sapiens GN=CEP170 PE=1 SV=1;sp|Q5SW79|CE170_HUMAN Centrosomal protein of 170 kDa OS=Homo sapiens GN=CEP170 PE=1 SV=1;sp|Q6A065|CE170_MOUSE Centrosomal protein of 170 kDa OS=Mus musculus GN=Cep170 PE=1 SV=2;sp|Q6A065|CE170_MOUSE Centrosomal protein of 170 kDa OS=Mus musculus GN=Cep170 PE=1 SV=2
CEP350	0.621176	0.683947	0.588832	0.577492	0.598791	0.571709	0.839478	0.703291	0.732394	0.87564	0.741939	0.895975	0.523746	0.553883	0.477121	0.580925	0.541579	0.69897	PREDICTED: centrosome-associated protein 350 [Pelodiscus sinensis]	-	-	K16768	CEP350	http://www.genome.jp/dbget-bin/www_bget?ko:K16768	-	-	KOG4568(ZR)(Cytoskeleton-associated protein and related proteins)	sp|Q5VT06|CE350_HUMAN;gnl|BL_ORD_ID|323611	sp|Q5VT06|CE350_HUMAN Centrosome-associated protein 350 OS=Homo sapiens GN=CEP350 PE=1 SV=1;sp|Q5VT06|CE350_HUMAN Centrosome-associated protein 350 OS=Homo sapiens GN=CEP350 PE=1 SV=1
CEP41	0.808211	0.673021	0.619093	0.805501	0.897627	0.74351	0.914872	0.781755	0.808211	0.860937	0.817565	0.811575	0.342423	0.424882	0.40654	0.424882	0.568202	0.394452	PREDICTED: centrosomal protein of 41 kDa isoform X1 [Pelodiscus sinensis];PREDICTED: centrosomal protein of 41 kDa isoform X2 [Gallus gallus];PREDICTED: centrosomal protein of 41 kDa isoform X2 [Pelodiscus sinensis]	GO:0060271;GO:0015031;GO:0036064;GO:0005886;GO:0005911;GO:0018095;GO:0005814;GO:0016337;GO:0005929;GO:0009986	cilium assembly;protein transport;ciliary basal body;plasma membrane;cell-cell junction;protein polyglutamylation;centriole;single organismal cell-cell adhesion;cilium;cell surface	K16455	CEP41,TSGA14	http://www.genome.jp/dbget-bin/www_bget?ko:K16455	-	-	-	gnl|BL_ORD_ID|324625;sp|E1C065|CEP41_CHICK	sp|E1C065|CEP41_CHICK Centrosomal protein of 41 kDa OS=Gallus gallus GN=CEP41 PE=3 SV=1;sp|E1C065|CEP41_CHICK Centrosomal protein of 41 kDa OS=Gallus gallus GN=CEP41 PE=3 SV=1
CEP83	1.01284	1.05956	1.03663	1.1014	1.09726	0.903633	0.933487	0.827369	0.943	0.875061	0.860338	0.782473	0.622214	0.550228	0.58995	0.800029	0.716838	0.760422	PREDICTED: centrosomal protein of 83 kDa [Pelodiscus sinensis]	GO:0048278;GO:0005814;GO:0051660	vesicle docking;centriole;establishment of centrosome localization	K16754	CCDC41	http://www.genome.jp/dbget-bin/www_bget?ko:K16754	-	-	-	gnl|BL_ORD_ID|327408;sp|Q9Y592|CEP83_HUMAN	sp|Q9Y592|CEP83_HUMAN Centrosomal protein of 83 kDa OS=Homo sapiens GN=CEP83 PE=1 SV=2;sp|Q9Y592|CEP83_HUMAN Centrosomal protein of 83 kDa OS=Homo sapiens GN=CEP83 PE=1 SV=2
CEP85	1.23274	1.05956	1.17638	1.47232	1.3019	1.29513	0.995635	0.959041	1.08135	1.03222	1.05461	0.995196	1.01536	1.00775	1.07773	1.28623	1.06595	1.14208	PREDICTED: centrosomal protein of 85 kDa [Pelodiscus sinensis]	GO:0005813	centrosome	K16766	CEP85	http://www.genome.jp/dbget-bin/www_bget?ko:K16766	-	-	-	sp|Q6P2H3|CEP85_HUMAN;gnl|BL_ORD_ID|326007	sp|Q6P2H3|CEP85_HUMAN Centrosomal protein of 85 kDa OS=Homo sapiens GN=CEP85 PE=1 SV=1;sp|Q6P2H3|CEP85_HUMAN Centrosomal protein of 85 kDa OS=Homo sapiens GN=CEP85 PE=1 SV=1
CEP85L	0.267172	0.158362	0.143015	0.181844	0.220108	0.1959	0.428135	0.451786	0.350248	0.487138	0.424882	0.535294	0.133539	0.161368	0.127105	0.152288	0.130334	0.117271	PREDICTED: centrosomal protein of 85 kDa-like [Pelodiscus sinensis]	-	-	K16766	CEP85	http://www.genome.jp/dbget-bin/www_bget?ko:K16766	-	-	-	gnl|BL_ORD_ID|324546;sp|Q5SZL2|CE85L_HUMAN	sp|Q5SZL2|CE85L_HUMAN Centrosomal protein of 85 kDa-like OS=Homo sapiens GN=CEP85L PE=1 SV=1;sp|Q5SZL2|CE85L_HUMAN Centrosomal protein of 85 kDa-like OS=Homo sapiens GN=CEP85L PE=1 SV=1
CERCAM	0.85248	0.799341	0.873321	1.23198	1.29907	0.947434	1.0569	0.956168	1.04139	1.07041	1.1827	1.14644	0.429752	0.44248	0.445604	0.814913	0.961421	0.730782	PREDICTED: probable inactive glycosyltransferase 25 family member 3 isoform X1 [Pelodiscus sinensis];PREDICTED: probable inactive glycosyltransferase 25 family member 3 isoform X3 [Pelodiscus sinensis];PREDICTED: probable inactive glycosyltransferase 25 family member 3 isoform X2 [Pelodiscus sinensis]	GO:0007155	cell adhesion	-	-	-	-	-	-	gnl|BL_ORD_ID|32743;sp|Q5T4B2|GT253_HUMAN;sp|A7MB73|GT253_BOVIN	sp|A7MB73|GT253_BOVIN Probable inactive glycosyltransferase 25 family member 3 OS=Bos taurus GN=CERCAM PE=2 SV=1;sp|Q5T4B2|GT253_HUMAN Probable inactive glycosyltransferase 25 family member 3 OS=Homo sapiens GN=CERCAM PE=1 SV=1;sp|A7MB73|GT253_BOVIN Probable inactive glycosyltransferase 25 family member 3 OS=Bos taurus GN=CERCAM PE=2 SV=1
CERS6	0.840106	0.703291	0.938019	0.416641	0.786751	0.603144	1.28578	1.27967	1.14582	1.33506	1.19479	1.21932	0.655138	1.17493	0.71433	0.372912	0.635484	0.820858	PREDICTED: ceramide synthase 6 isoform X1 [Pelodiscus sinensis];PREDICTED: ceramide synthase 6 isoform X2 [Gavialis gangeticus];PREDICTED: ceramide synthase 6 isoform X2 [Pelodiscus sinensis];PREDICTED: ceramide synthase 6 [Gallus gallus]	GO:0030148;GO:0003677;GO:0050291;GO:0016021;GO:0046513;GO:0016020;GO:0005783;GO:0005634	sphingolipid biosynthetic process;DNA binding;sphingosine N-acyltransferase activity;integral component of membrane;ceramide biosynthetic process;membrane;endoplasmic reticulum;nucleus	K04710	CERS	http://www.genome.jp/dbget-bin/www_bget?ko:K04710	Sphingolipid signaling pathway;Sphingolipid metabolism	ko04071,ko00600	KOG1607(U)(Protein transporter of the TRAM (translocating chain-associating membrane) superfamily)	sp|Q8C172|CERS6_MOUSE;gnl|BL_ORD_ID|326014;sp|Q6ZMG9|CERS6_HUMAN	sp|Q8C172|CERS6_MOUSE Ceramide synthase 6 OS=Mus musculus GN=Cers6 PE=1 SV=1;sp|Q6ZMG9|CERS6_HUMAN Ceramide synthase 6 OS=Homo sapiens GN=CERS6 PE=1 SV=1;sp|Q6ZMG9|CERS6_HUMAN Ceramide synthase 6 OS=Homo sapiens GN=CERS6 PE=1 SV=1
CFAP100	1.19145	1.24105	1.36959	1.10037	1.00432	1.3587	0.936011	0.716838	0.968483	0.793092	0.819544	0.812913	0.746634	0.545307	0.705008	0.811575	0.924279	0.883093	PREDICTED: coiled-coil domain-containing protein 37 [Pelodiscus sinensis]	-	-	-	-	-	-	-	-	gnl|BL_ORD_ID|320001	sp|Q494V2|CP100_HUMAN Cilia- and flagella-associated protein 100 OS=Homo sapiens GN=CFAP100 PE=2 SV=1
CFAP70	1.02531	1.02036	1.21906	0.806858	0.673021	0.851258	0.71433	0.644439	0.716003	0.735599	0.658965	0.593286	0.532754	0.604226	0.440909	0.594393	0.683947	0.585461	PREDICTED: cilia- and flagella-associated protein 70 isoform X3 [Monodelphis domestica];PREDICTED: cilia- and flagella-associated protein 70 [Alligator sinensis];PREDICTED: tetratricopeptide repeat protein 18 [Chrysemys picta bellii];PREDICTED: cilia- and flagella-associated protein 70 [Pelodiscus sinensis];PREDICTED: tetratricopeptide repeat protein 18-like [Chelonia mydas]	GO:0070062	extracellular exosome	-	-	-	-	-	-	sp|Q95LN2|CFA70_MACFA;gnl|BL_ORD_ID|327958;sp|Q5T0N1|CFA70_HUMAN	sp|Q95LN2|CFA70_MACFA Cilia- and flagella-associated protein 70 OS=Macaca fascicularis GN=CFAP70 PE=2 SV=2;sp|Q5T0N1|CFA70_HUMAN Cilia- and flagella-associated protein 70 OS=Homo sapiens GN=CFAP70 PE=2 SV=3;sp|Q5T0N1|CFA70_HUMAN Cilia- and flagella-associated protein 70 OS=Homo sapiens GN=CFAP70 PE=2 SV=3
CFAP74	1.14613	1.18384	1.2737	0.872156	0.903633	1.07591	0.993877	0.928908	1.04454	0.923762	0.961421	0.862728	1.09167	1.33365	1.25188	1.16495	1.09968	1.15229	PREDICTED: cilia- and flagella-associated protein 74 [Pelodiscus sinensis]	-	-	-	-	-	-	-	-	gnl|BL_ORD_ID|329129;sp|Q9C0B2|CFA74_HUMAN;sp|Q3UY96|CFA74_MOUSE	sp|Q3UY96|CFA74_MOUSE Cilia- and flagella-associated protein 74 OS=Mus musculus GN=Cfap74 PE=2 SV=3;sp|Q9C0B2|CFA74_HUMAN Cilia- and flagella-associated protein 74 OS=Homo sapiens GN=CFAP74 PE=2 SV=3;sp|Q3UY96|CFA74_MOUSE Cilia- and flagella-associated protein 74 OS=Mus musculus GN=Cfap74 PE=2 SV=3
CFI	0.932981	1.0013	1.16967	0.444045	0.509203	0.532754	1.15534	0.997386	1.15564	0.769377	2.01874	0.790285	0.877947	0.640481	0.41162	0.404834	0.586587	0.518514	PREDICTED: complement factor I isoform X1 [Pelodiscus sinensis];PREDICTED: complement factor I isoform X2 [Pelodiscus sinensis]	GO:0008233;GO:0070062;GO:0008236;GO:0005044;GO:0016020;GO:0005615;GO:0016787;GO:0006508;GO:0004252	peptidase activity;extracellular exosome;serine-type peptidase activity;scavenger receptor activity;membrane;extracellular space;hydrolase activity;proteolysis;serine-type endopeptidase activity	K01333	CFI	http://www.genome.jp/dbget-bin/www_bget?ko:K01333	Complement and coagulation cascades	ko04610	-	sp|Q5R5A4|CFAI_PONAB;sp|Q61129|CFAI_MOUSE;gnl|BL_ORD_ID|327962	sp|Q5R5A4|CFAI_PONAB Complement factor I OS=Pongo abelii GN=CFI PE=2 SV=1;sp|Q61129|CFAI_MOUSE Complement factor I OS=Mus musculus GN=Cfi PE=1 SV=3;sp|Q61129|CFAI_MOUSE Complement factor I OS=Mus musculus GN=Cfi PE=1 SV=3
CFTR	0.260071	0.170262	0.262451	0.181844	0.32838	0.222716	0.491362	0.243038	0.25042	0.324282	0.285557	0.222716	0.290035	0.1959	0.247973	0.584331	0.612784	0.773786	PREDICTED: cystic fibrosis transmembrane conductance regulator [Pelodiscus sinensis];PREDICTED: cystic fibrosis transmembrane conductance regulator [Propithecus coquereli]	GO:0019869;GO:0005769;GO:0005524;GO:0005886;GO:0006810;GO:0015106;GO:0006821;GO:0005768;GO:0031901;GO:0016021;GO:0055085;GO:0006811;GO:0016020;GO:0005260;GO:0048240;GO:0000166;GO:0016787;GO:0016887;GO:0051454;GO:0071320;GO:0005254;GO:0015108;GO:0042626;GO:0034707;GO:0060081	chloride channel inhibitor activity;early endosome;ATP binding;plasma membrane;transport;bicarbonate transmembrane transporter activity;chloride transport;endosome;early endosome membrane;integral component of membrane;transmembrane transport;ion transport;membrane;intracellular ATPase-gated chloride channel activity;sperm capacitation;nucleotide binding;hydrolase activity;ATPase activity;intrace…	K05031	CFTR,ABCC7	http://www.genome.jp/dbget-bin/www_bget?ko:K05031	Tight junction;ABC transporters;AMPK signaling pathway;cAMP signaling pathway;Bile secretion;Gastric acid secretion;Pancreatic secretion	ko04530,ko02010,ko04152,ko04024,ko04976,ko04971,ko04972	KOG0054(Q)(Multidrug resistance-associated protein/mitoxantrone resistance protein, ABC superfamily)	gnl|BL_ORD_ID|329158;sp|Q2QLA3|CFTR_HORSE;sp|P26363|CFTR_XENLA;sp|Q07DZ6|CFTR_ORNAN	sp|Q2QLA3|CFTR_HORSE Cystic fibrosis transmembrane conductance regulator OS=Equus caballus GN=CFTR PE=3 SV=1;sp|Q2QLA3|CFTR_HORSE Cystic fibrosis transmembrane conductance regulator OS=Equus caballus GN=CFTR PE=3 SV=1;sp|P26363|CFTR_XENLA Cystic fibrosis transmembrane conductance regulator OS=Xenopus laevis GN=cftr PE=2 SV=1;sp|Q07DZ6|CFTR_ORNAN Cystic fibrosis transmembrane conductance regulator…
CH25H	0.130334	0.303196	0.133539	0.212188	0.161368	0.10721	0.212188	0.230449	0.217484	0.539076	0.352183	0.206826	0.481443	0.565848	0.52763	0.494155	0.11059	0.350248	PREDICTED: cholesterol 25-hydroxylase [Pelodiscus sinensis]	GO:0005506;GO:0016021;GO:0016020;GO:0055114;GO:0006633;GO:0016491	iron ion binding;integral component of membrane;membrane;oxidation-reduction process;fatty acid biosynthetic process;oxidoreductase activity	K10223	CH25H	http://www.genome.jp/dbget-bin/www_bget?ko:K10223	Primary bile acid biosynthesis	ko00120	KOG0873(I)(C-4 sterol methyl oxidase)	gnl|BL_ORD_ID|324196	sp|Q5PRC0|CH25H_DANRE Cholesterol 25-hydroxylase-like protein OS=Danio rerio GN=ch25h PE=2 SV=1
CHAC1	0.746634	0.292256	0.376577	0.764176	0.895975	0.780317	0.920645	0.848189	0.675778	0.399674	0.365488	0.579784	0.235528	0.350248	0.290035	0.313867	0.274158	0.469822	PREDICTED: glutathione-specific gamma-glutamylcyclotransferase 1, partial [Pelodiscus sinensis]	-	-	K07232	chaC	http://www.genome.jp/dbget-bin/www_bget?ko:K07232	-	-	KOG3182(P)(Predicted cation transporter)	gnl|BL_ORD_ID|336102;sp|Q9BUX1|CHAC1_HUMAN	sp|Q9BUX1|CHAC1_HUMAN Glutathione-specific gamma-glutamylcyclotransferase 1 OS=Homo sapiens GN=CHAC1 PE=1 SV=2;sp|Q9BUX1|CHAC1_HUMAN Glutathione-specific gamma-glutamylcyclotransferase 1 OS=Homo sapiens GN=CHAC1 PE=1 SV=2
CHAF1A	1.24748	1.36754	1.32634	1.21272	1.09552	1.17696	1.00303	1.07004	1.11394	1.1038	0.974051	1.1682	0.640481	0.542825	0.599883	0.534026	0.644439	0.718502	PREDICTED: chromatin assembly factor 1 subunit A [Pelodiscus sinensis]	-	-	K10750	CHAF1A	http://www.genome.jp/dbget-bin/www_bget?ko:K10750	-	-	-	sp|Q5R1T0|CAF1A_CHICK;gnl|BL_ORD_ID|312424	sp|Q5R1T0|CAF1A_CHICK Chromatin assembly factor 1 subunit A OS=Gallus gallus GN=CHAF1A PE=1 SV=1;sp|Q5R1T0|CAF1A_CHICK Chromatin assembly factor 1 subunit A OS=Gallus gallus GN=CHAF1A PE=1 SV=1
CHAF1B	1.15897	1.1186	1.07225	1.3694	1.26858	1.2307	1.13418	1.15836	1.20276	1.15351	1.11628	1.24005	0.74351	0.634477	0.546543	0.730782	0.83187	0.873321	PREDICTED: chromatin assembly factor 1 subunit B [Pelodiscus sinensis]	GO:0005654;GO:0098779;GO:0043234;GO:0098792;GO:0005829;GO:0002230;GO:0000790;GO:0031497;GO:0033186;GO:0006335	nucleoplasm;positive regulation of macromitophagy in response to mitochondrial depolarization;protein complex;xenophagy;cytosol;positive regulation of defense response to virus by host;nuclear chromatin;chromatin assembly;CAF-1 complex;DNA replication-dependent nucleosome assembly	K10751	CHAF1B	http://www.genome.jp/dbget-bin/www_bget?ko:K10751	-	-	KOG0266(R)(WD40 repeat-containing protein);KOG1009(BL)(Chromatin assembly complex 1 subunit B/CAC2 (contains WD40 repeats))	sp|Q5R1S9|CAF1B_CHICK;gnl|BL_ORD_ID|309817	sp|Q5R1S9|CAF1B_CHICK Chromatin assembly factor 1 subunit B OS=Gallus gallus GN=CHAF1B PE=1 SV=1;sp|Q5R1S9|CAF1B_CHICK Chromatin assembly factor 1 subunit B OS=Gallus gallus GN=CHAF1B PE=1 SV=1
CHD1	1.03941	1.05614	1.01494	0.895423	0.78746	0.860937	0.748963	0.815578	0.783189	0.786751	0.761928	0.845098	0.699838	0.758155	0.561101	0.744293	0.71265	0.747412	PREDICTED: chromodomain-helicase-DNA-binding protein 1 isoform X4 [Pelodiscus sinensis];PREDICTED: chromodomain-helicase-DNA-binding protein 1 isoform X3 [Pelodiscus sinensis];PREDICTED: chromodomain-helicase-DNA-binding protein 1 isoform X1 [Pelodiscus sinensis];PREDICTED: chromodomain-helicase-DNA-binding protein 1 isoform X2 [Pelodiscus sinensis]	GO:0003677;GO:0005524;GO:0004386;GO:0005634	DNA binding;ATP binding;helicase activity;nucleus	K11367	CHD1	http://www.genome.jp/dbget-bin/www_bget?ko:K11367	-	-	KOG0385(K)(Chromatin remodeling complex WSTF-ISWI, small subunit)	gnl|BL_ORD_ID|325366;sp|B6ZLK2|CHD1_CHICK	sp|B6ZLK2|CHD1_CHICK Chromodomain-helicase-DNA-binding protein 1 OS=Gallus gallus GN=CHD1 PE=1 SV=1;sp|B6ZLK2|CHD1_CHICK Chromodomain-helicase-DNA-binding protein 1 OS=Gallus gallus GN=CHD1 PE=1 SV=1
CHD5	0.09691	0.064458	0.0827854	0.225309	0.313867	0.176091	0.181844	0.123852	0.184691	0.0863598	0.193125	0.278754	0.0211893	0.0413927	0.045323	0.0606978	0.064458	0.0827854	PREDICTED: chromodomain-helicase-DNA-binding protein 5 [Pelodiscus sinensis]	-	-	K14435	CHD5	http://www.genome.jp/dbget-bin/www_bget?ko:K14435	-	-	KOG0385(K)(Chromatin remodeling complex WSTF-ISWI, small subunit)	gnl|BL_ORD_ID|328206;sp|Q8TDI0|CHD5_HUMAN	sp|Q8TDI0|CHD5_HUMAN Chromodomain-helicase-DNA-binding protein 5 OS=Homo sapiens GN=CHD5 PE=1 SV=1;sp|Q8TDI0|CHD5_HUMAN Chromodomain-helicase-DNA-binding protein 5 OS=Homo sapiens GN=CHD5 PE=1 SV=1
CHEK1	1.40756	1.43712	1.34811	1.39164	1.24055	1.32736	1.16967	1.18355	1.13893	1.18498	1.17551	1.31006	0.873321	0.846337	0.771587	0.775974	0.961895	0.965202	PREDICTED: serine/threonine-protein kinase Chk1 isoform X2 [Acinonyx jubatus];PREDICTED: serine/threonine-protein kinase Chk1 [Pelodiscus sinensis];PREDICTED: serine/threonine-protein kinase Chk1 [Chrysemys picta bellii]	GO:0004672;GO:0005654;GO:0005524;GO:0004674;GO:2000615;GO:0035407;GO:0006974;GO:0031572;GO:0035402;GO:0000781;GO:0010569;GO:0000077;GO:0048096;GO:0000166;GO:0043231;GO:0000785;GO:0005615;GO:0071260;GO:0006468;GO:0005657;GO:0005634;GO:0006281;GO:0005813;GO:0000794	protein kinase activity;nucleoplasm;ATP binding;protein serine/threonine kinase activity;regulation of histone H3-K9 acetylation;histone H3-T11 phosphorylation;cellular response to DNA damage stimulus;G2 DNA damage checkpoint;histone kinase activity (H3-T11 specific);chromosome, telomeric region;regulation of double-strand break repair via homologous recombination;DNA damage checkpoint;chromatin-…	K02216	CHK1	http://www.genome.jp/dbget-bin/www_bget?ko:K02216	Cell cycle;Cell cycle - yeast;Meiosis - yeast;p53 signaling pathway	ko04110,ko04111,ko04113,ko04115	KOG0590(D)(Checkpoint kinase and related serine/threonine protein kinases);KOG0583(T)(Serine/threonine protein kinase)	sp|O14757|CHK1_HUMAN;gnl|BL_ORD_ID|327259	sp|O14757|CHK1_HUMAN Serine/threonine-protein kinase Chk1 OS=Homo sapiens GN=CHEK1 PE=1 SV=2;sp|O14757|CHK1_HUMAN Serine/threonine-protein kinase Chk1 OS=Homo sapiens GN=CHEK1 PE=1 SV=2
CHFR	1.02776	1.10483	0.925828	0.810233	0.638489	0.677607	1.08991	1.03222	0.911158	0.798651	0.754348	0.755875	0.971276	1.12613	1.17406	0.797268	0.790988	0.731589	PREDICTED: LOW QUALITY PROTEIN: E3 ubiquitin-protein ligase CHFR [Pelodiscus sinensis]	-	-	K10644	CHFR	http://www.genome.jp/dbget-bin/www_bget?ko:K10644	-	-	-	sp|Q810L3|CHFR_MOUSE;sp|Q96EP1|CHFR_HUMAN;gnl|BL_ORD_ID|327239	sp|Q810L3|CHFR_MOUSE E3 ubiquitin-protein ligase CHFR OS=Mus musculus GN=Chfr PE=1 SV=1;sp|Q96EP1|CHFR_HUMAN E3 ubiquitin-protein ligase CHFR OS=Homo sapiens GN=CHFR PE=1 SV=2;sp|Q96EP1|CHFR_HUMAN E3 ubiquitin-protein ligase CHFR OS=Homo sapiens GN=CHFR PE=1 SV=2
CHIC2	0.290035	0.49276	0.340444	0.352183	0.350248	0.278754	0.683047	0.55145	0.478566	0.600973	0.567026	0.624282	0.423246	0.361728	0.33646	0.320146	0.394452	0.346353	PREDICTED: cysteine-rich hydrophobic domain-containing protein 2, partial [Pelodiscus sinensis];PREDICTED: LOW QUALITY PROTEIN: cysteine-rich hydrophobic domain-containing protein 2 [Manacus vitellinus];PREDICTED: cysteine-rich hydrophobic domain-containing protein 2-like [Phalacrocorax carbo];PREDICTED: cysteine-rich hydrophobic domain-containing protein 2 [Leptosomus discolor];PREDICTED: cystei…	GO:0016020;GO:0006893;GO:0005798;GO:0005886;GO:0016021;GO:0005794	membrane;Golgi to plasma membrane transport;Golgi-associated vesicle;plasma membrane;integral component of membrane;Golgi apparatus	-	-	-	-	-	-	sp|Q9UKJ5|CHIC2_HUMAN;gnl|BL_ORD_ID|332537	sp|Q9UKJ5|CHIC2_HUMAN Cysteine-rich hydrophobic domain-containing protein 2 OS=Homo sapiens GN=CHIC2 PE=1 SV=1;sp|Q9UKJ5|CHIC2_HUMAN Cysteine-rich hydrophobic domain-containing protein 2 OS=Homo sapiens GN=CHIC2 PE=1 SV=1
CHMP4C	0.962369	0.922725	0.850646	0.7348	0.718502	0.788875	0.951338	0.91698	0.939519	1.03222	0.874482	0.946943	0.804821	0.85248	0.781037	0.912222	0.888741	0.885361	PREDICTED: charged multivesicular body protein 4c [Pelodiscus sinensis]	-	-	K12194	CHMP4,SNF7,VPS32	http://www.genome.jp/dbget-bin/www_bget?ko:K12194	Necroptosis;Endocytosis	ko04217,ko04144	KOG1656(U)(Protein involved in glucose derepression and pre-vacuolar endosome protein sorting)	sp|Q6GNN8|CHM4C_XENLA;gnl|BL_ORD_ID|326805;sp|Q96CF2|CHM4C_HUMAN	sp|Q6GNN8|CHM4C_XENLA Charged multivesicular body protein 4c OS=Xenopus laevis GN=chmp4c PE=2 SV=1;sp|Q96CF2|CHM4C_HUMAN Charged multivesicular body protein 4c OS=Homo sapiens GN=CHMP4C PE=1 SV=1;sp|Q96CF2|CHM4C_HUMAN Charged multivesicular body protein 4c OS=Homo sapiens GN=CHMP4C PE=1 SV=1
CHODL	0.665581	0.584331	0.503791	0.844477	0.881385	0.71265	0.750508	0.827369	0.803457	0.641474	0.759668	0.91169	0.232996	0.243038	0.380211	0.155336	0.322219	0.450249	PREDICTED: chondrolectin isoform X2 [Pelodiscus sinensis];PREDICTED: chondrolectin isoform X3 [Pelodiscus sinensis];PREDICTED: chondrolectin isoform X1 [Pelodiscus sinensis]	GO:0005737;GO:0010975;GO:0048471;GO:0016021;GO:0016020	cytoplasm;regulation of neuron projection development;perinuclear region of cytoplasm;integral component of membrane;membrane	K10078	CHODL	http://www.genome.jp/dbget-bin/www_bget?ko:K10078	-	-	-	sp|Q9H9P2|CHODL_HUMAN;gnl|BL_ORD_ID|334273	sp|Q9H9P2|CHODL_HUMAN Chondrolectin OS=Homo sapiens GN=CHODL PE=2 SV=2;sp|Q9H9P2|CHODL_HUMAN Chondrolectin OS=Homo sapiens GN=CHODL PE=2 SV=2
CHORDC1	0.868056	0.820201	0.716838	0.784617	0.907949	0.728354	1.21617	1.0976	1.05461	1.20683	1.11893	1.08778	0.744293	0.783904	0.579784	0.718502	0.732394	0.796574	PREDICTED: cysteine and histidine-rich domain-containing protein 1 isoform X1 [Pelodiscus sinensis]<>XP_006118448.1 PREDICTED: cysteine and histidine-rich domain-containing protein 1 isoform X3 [Pelodiscus sinensis];PREDICTED: cysteine and histidine-rich domain-containing protein 1 isoform X2 [Pelodiscus sinensis]	GO:0010824;GO:0043531;GO:0005524;GO:0061077;GO:2000299;GO:1900034;GO:0051879;GO:0008270	regulation of centrosome duplication;ADP binding;ATP binding;chaperone-mediated protein folding;negative regulation of Rho-dependent protein serine/threonine kinase activity;regulation of cellular response to heat;Hsp90 protein binding;zinc ion binding	K16729	CHORDC1,CHP1	http://www.genome.jp/dbget-bin/www_bget?ko:K16729	-	-	KOG1667(R)(Zn2+-binding protein Melusin/RAR1, contains CHORD domain)	gnl|BL_ORD_ID|330002;sp|Q5ZML4|CHRD1_CHICK	sp|Q5ZML4|CHRD1_CHICK Cysteine and histidine-rich domain-containing protein 1 OS=Gallus gallus GN=CHORDC1 PE=2 SV=1;sp|Q5ZML4|CHRD1_CHICK Cysteine and histidine-rich domain-containing protein 1 OS=Gallus gallus GN=CHORDC1 PE=2 SV=1
CHRM1	0.155336	0.190332	0.146128	0.139879	0.161368	0.164353	0.1959	0.167317	0.220108	0.257679	0.181844	0.320146	0.453318	0.190332	0.193125	0.665581	0.354108	0.338456	PREDICTED: muscarinic acetylcholine receptor M1 [Pelodiscus sinensis]<>XP_014435810.1 PREDICTED: muscarinic acetylcholine receptor M1 [Pelodiscus sinensis]<>XP_014435811.1 PREDICTED: muscarinic acetylcholine receptor M1 [Pelodiscus sinensis]	GO:0005886;GO:0016907;GO:0030054;GO:0016021;GO:0045202;GO:0045211;GO:0007186;GO:0043270;GO:0016020;GO:0005887;GO:0004871;GO:0007165;GO:0004930;GO:0040012	plasma membrane;G-protein coupled acetylcholine receptor activity;cell junction;integral component of membrane;synapse;postsynaptic membrane;G-protein coupled receptor signaling pathway;positive regulation of ion transport;membrane;integral component of plasma membrane;signal transducer activity;signal transduction;G-protein coupled receptor activity;regulation of locomotion	K04129	CHRM1	http://www.genome.jp/dbget-bin/www_bget?ko:K04129	Regulation of actin cytoskeleton;Calcium signaling pathway;PI3K-Akt signaling pathway;cAMP signaling pathway;Neuroactive ligand-receptor interaction;Cholinergic synapse	ko04810,ko04020,ko04151,ko04024,ko04080,ko04725	KOG4220(T)(Muscarinic acetylcholine receptor)	sp|P08482|ACM1_RAT;gnl|BL_ORD_ID|264153	sp|P08482|ACM1_RAT Muscarinic acetylcholine receptor M1 OS=Rattus norvegicus GN=Chrm1 PE=1 SV=1;sp|P08482|ACM1_RAT Muscarinic acetylcholine receptor M1 OS=Rattus norvegicus GN=Chrm1 PE=1 SV=1
CHRM3	0.0530784	0.326336	0.290035	0.0863598	0.09691	0.049218	0.178977	0.243038	0.181844	0.383815	0.164353	0.193125	0.511883	0.232996	0.372912	0.305351	0.292256	0.55145	PREDICTED: muscarinic acetylcholine receptor M3 isoform X1 [Pelodiscus sinensis]	-	-	K04131	CHRM3	http://www.genome.jp/dbget-bin/www_bget?ko:K04131	Regulation of actin cytoskeleton;Calcium signaling pathway;Neuroactive ligand-receptor interaction;Gastric acid secretion;Pancreatic secretion;Salivary secretion;Insulin secretion;Cholinergic synapse;Taste transduction	ko04810,ko04020,ko04080,ko04971,ko04972,ko04970,ko04911,ko04725,ko04742	KOG4220(T)(Muscarinic acetylcholine receptor);KOG3656(R)(FOG: 7 transmembrane receptor)	gnl|BL_ORD_ID|262504;sp|P49578|ACM3_CHICK	sp|P49578|ACM3_CHICK Muscarinic acetylcholine receptor M3 OS=Gallus gallus GN=CHRM3 PE=2 SV=1;sp|P49578|ACM3_CHICK Muscarinic acetylcholine receptor M3 OS=Gallus gallus GN=CHRM3 PE=2 SV=1
CHST1	0.485721	0.350248	0.334454	0.61595	0.499687	0.5302	0.485721	0.4133	0.523746	0.367356	0.475671	0.596597	0.10721	0.158362	0.152288	0.198657	0.0934217	0.247973	PREDICTED: carbohydrate sulfotransferase 1 [Pelodiscus sinensis]	GO:0006790;GO:0008146;GO:0005975;GO:0016740;GO:0045130;GO:0042339;GO:0000139;GO:0006012	sulfur compound metabolic process;sulfotransferase activity;carbohydrate metabolic process;transferase activity;keratan sulfotransferase activity;keratan sulfate metabolic process;Golgi membrane;galactose metabolic process	K01022	CHST1	http://www.genome.jp/dbget-bin/www_bget?ko:K01022	Glycosaminoglycan biosynthesis - keratan sulfate	ko00533	-	sp|O43916|CHST1_HUMAN;gnl|BL_ORD_ID|334310	sp|O43916|CHST1_HUMAN Carbohydrate sulfotransferase 1 OS=Homo sapiens GN=CHST1 PE=1 SV=1;sp|O43916|CHST1_HUMAN Carbohydrate sulfotransferase 1 OS=Homo sapiens GN=CHST1 PE=1 SV=1
CHST12	0.684845	0.563481	0.595496	0.835056	0.863323	0.740363	1.01578	0.973128	0.984077	0.942008	0.900367	0.996074	0.863323	1.02284	1.24055	1.00689	1.16584	1.08636	PREDICTED: carbohydrate sulfotransferase 12 [Pelodiscus sinensis]<>XP_006112941.1 PREDICTED: carbohydrate sulfotransferase 12 [Pelodiscus sinensis]<>XP_006112942.1 PREDICTED: carbohydrate sulfotransferase 12 [Pelodiscus sinensis]	GO:0016020;GO:0030206;GO:0008146;GO:0016051;GO:0030208;GO:0016740;GO:0016021;GO:0047756	membrane;chondroitin sulfate biosynthetic process;sulfotransferase activity;carbohydrate biosynthetic process;dermatan sulfate biosynthetic process;transferase activity;integral component of membrane;chondroitin 4-sulfotransferase activity	K04742	CHST12	http://www.genome.jp/dbget-bin/www_bget?ko:K04742	Glycosaminoglycan biosynthesis - chondroitin sulfate / dermatan sulfate	ko00532	-	gnl|BL_ORD_ID|325498;sp|Q99LL3|CHSTC_MOUSE	sp|Q99LL3|CHSTC_MOUSE Carbohydrate sulfotransferase 12 OS=Mus musculus GN=Chst12 PE=2 SV=2;sp|Q99LL3|CHSTC_MOUSE Carbohydrate sulfotransferase 12 OS=Mus musculus GN=Chst12 PE=2 SV=2
CHST14	0.781037	0.880242	0.684845	0.814248	0.955207	0.898725	1.12548	1.13354	1.07298	1.20112	1.15412	1.34084	0.690196	0.661813	0.700704	0.718502	0.653213	0.801404	PREDICTED: carbohydrate sulfotransferase 14 [Pelodiscus sinensis]	GO:0070062;GO:0008146;GO:0001537;GO:0016021;GO:0016020;GO:0016051;GO:0050655	extracellular exosome;sulfotransferase activity;N-acetylgalactosamine 4-O-sulfotransferase activity;integral component of membrane;membrane;carbohydrate biosynthetic process;dermatan sulfate proteoglycan metabolic process	K08105	D4ST1	http://www.genome.jp/dbget-bin/www_bget?ko:K08105	Glycosaminoglycan biosynthesis - chondroitin sulfate / dermatan sulfate	ko00532	-	gnl|BL_ORD_ID|334316	sp|Q8NCH0|CHSTE_HUMAN Carbohydrate sulfotransferase 14 OS=Homo sapiens GN=CHST14 PE=1 SV=2
CHST2	0.374748	0.419956	0.294466	0.874482	1.01242	0.628389	0.815578	0.721811	0.811575	0.70927	0.725912	0.848805	0.389166	0.418301	0.294466	0.546543	0.436163	0.555094	PREDICTED: carbohydrate sulfotransferase 2 [Pelodiscus sinensis]	GO:0006790;GO:0008146;GO:0005975;GO:0016740;GO:0005802;GO:0006044;GO:0001517;GO:0000139	sulfur compound metabolic process;sulfotransferase activity;carbohydrate metabolic process;transferase activity;trans-Golgi network;N-acetylglucosamine metabolic process;N-acetylglucosamine 6-O-sulfotransferase activity;Golgi membrane	K04745	CHST2	http://www.genome.jp/dbget-bin/www_bget?ko:K04745	Glycosaminoglycan biosynthesis - keratan sulfate	ko00533	-	gnl|BL_ORD_ID|330033	sp|Q9Y4C5|CHST2_HUMAN Carbohydrate sulfotransferase 2 OS=Homo sapiens GN=CHST2 PE=1 SV=2
CKAP2	1.03141	0.858537	0.749736	0.870989	0.96426	0.894316	1.06521	1.04021	1.02694	1.12548	1.02119	1.08814	0.403121	0.39794	0.518514	0.342423	0.474216	0.459392	PREDICTED: cytoskeleton-associated protein 2, partial [Pelodiscus sinensis]	-	-	K16769	CKAP2	http://www.genome.jp/dbget-bin/www_bget?ko:K16769	-	-	-	gnl|BL_ORD_ID|335622;sp|Q5R7F8|CKAP2_PONAB;sp|Q8WWK9|CKAP2_HUMAN	sp|Q5R7F8|CKAP2_PONAB Cytoskeleton-associated protein 2 OS=Pongo abelii GN=CKAP2 PE=2 SV=1;sp|Q5R7F8|CKAP2_PONAB Cytoskeleton-associated protein 2 OS=Pongo abelii GN=CKAP2 PE=2 SV=1;sp|Q8WWK9|CKAP2_HUMAN Cytoskeleton-associated protein 2 OS=Homo sapiens GN=CKAP2 PE=1 SV=1
CLCN2	0.209515	0.0827854	0.130334	0.374748	0.426511	0.294466	0.133539	0.133539	0.257679	0.167317	0.206826	0.100371	0.00860017	0.00860017	0.0211893	0.30963	0.324282	0.198657	PREDICTED: LOW QUALITY PROTEIN: chloride channel protein 2 [Pelodiscus sinensis]	-	-	K05011	CLCN2	http://www.genome.jp/dbget-bin/www_bget?ko:K05011	Mineral absorption	ko04978	KOG0474(P)(Cl- channel CLC-7 and related proteins (CLC superfamily))	sp|P51789|CLCN2_RABIT;gnl|BL_ORD_ID|330120;sp|P35525|CLCN2_RAT	sp|P51789|CLCN2_RABIT Chloride channel protein 2 OS=Oryctolagus cuniculus GN=CLCN2 PE=2 SV=1;sp|P51789|CLCN2_RABIT Chloride channel protein 2 OS=Oryctolagus cuniculus GN=CLCN2 PE=2 SV=1;sp|P35525|CLCN2_RAT Chloride channel protein 2 OS=Rattus norvegicus GN=Clcn2 PE=1 SV=1
CLDN12	0.706718	0.764176	0.697229	0.62634	0.670246	0.58995	0.719331	0.748188	0.802089	0.886491	0.788875	0.775974	0.660865	0.811575	0.790285	0.71433	0.672098	0.716003	PREDICTED: claudin-12 isoform X3 [Chrysemys picta bellii];PREDICTED: uncharacterized protein LOC101939591 isoform X1 [Chrysemys picta bellii]	GO:0005886;GO:0030054;GO:0016021;GO:0016020;GO:0016328;GO:0005198;GO:0071944;GO:0005923	plasma membrane;cell junction;integral component of membrane;membrane;lateral plasma membrane;structural molecule activity;cell periphery;bicellular tight junction	-	-	-	-	-	-	gnl|BL_ORD_ID|335670	sp|P56749|CLD12_HUMAN Claudin-12 OS=Homo sapiens GN=CLDN12 PE=1 SV=1
CLDN34	0.262451	0.864511	0.596597	0.33646	0.290035	0.264818	0.25042	0.344392	0.318063	0.369216	0.298853	0.320146	0.526339	0.33646	0.519828	0.819544	0.577492	0.499687	PREDICTED: claudin-34 [Pelodiscus sinensis]	-	-	-	-	-	-	-	-	sp|H7C241|CLD34_HUMAN;gnl|BL_ORD_ID|335674	sp|H7C241|CLD34_HUMAN Claudin-34 OS=Homo sapiens GN=CLDN34 PE=3 SV=2;sp|H7C241|CLD34_HUMAN Claudin-34 OS=Homo sapiens GN=CLDN34 PE=3 SV=2
CLEC16A	0.322219	0.255273	0.146128	0.283301	0.296665	0.220108	0.708421	0.585461	0.50515	0.663701	0.561101	0.645422	0.133539	0.396199	0.354108	0.149219	0.332438	0.307496	PREDICTED: protein CLEC16A isoform X3 [Pelodiscus sinensis];PREDICTED: protein CLEC16A isoform X2 [Pelodiscus sinensis];PREDICTED: protein CLEC16A isoform X1 [Pelodiscus sinensis]	-	-	K19513	CLEC16A	http://www.genome.jp/dbget-bin/www_bget?ko:K19513	-	-	-	gnl|BL_ORD_ID|332683;sp|Q2KHT3|CL16A_HUMAN;sp|Q80U30|CL16A_MOUSE	sp|Q2KHT3|CL16A_HUMAN Protein CLEC16A OS=Homo sapiens GN=CLEC16A PE=1 SV=2;sp|Q2KHT3|CL16A_HUMAN Protein CLEC16A OS=Homo sapiens GN=CLEC16A PE=1 SV=2;sp|Q80U30|CL16A_MOUSE Protein CLEC16A OS=Mus musculus GN=Clec16a PE=1 SV=2
CLEC19A	0.848189	0.624282	0.856124	0.755112	0.702431	0.764176	0.679428	0.50515	0.642465	0.471292	0.617	0.700704	0	0.117271	0.049218	0.100371	0.164353	0.352183	PREDICTED: C-type lectin domain family 19 member A [Pelodiscus sinensis]	-	-	-	-	-	-	-	-	sp|Q6UXS0|CL19A_HUMAN;gnl|BL_ORD_ID|331818	sp|Q6UXS0|CL19A_HUMAN C-type lectin domain family 19 member A OS=Homo sapiens GN=CLEC19A PE=2 SV=1;sp|Q6UXS0|CL19A_HUMAN C-type lectin domain family 19 member A OS=Homo sapiens GN=CLEC19A PE=2 SV=1
CLIC6	0.567026	0.863917	0.40654	0.523746	0.385606	0.896526	0.873902	0.853698	0.984977	1.15381	1.00988	0.722634	0.800029	1.11093	1.37383	1.22063	0.744293	1.09968	PREDICTED: chloride intracellular channel protein 6 isoform X1 [Pelodiscus sinensis];PREDICTED: chloride intracellular channel protein 6 isoform X2 [Pelodiscus sinensis]	GO:0005737;GO:0070062;GO:0006810;GO:0006821;GO:0006811;GO:0016020;GO:0050780;GO:0005254;GO:0005244;GO:0034765;GO:0034707	cytoplasm;extracellular exosome;transport;chloride transport;ion transport;membrane;dopamine receptor binding;chloride channel activity;voltage-gated ion channel activity;regulation of ion transmembrane transport;chloride channel complex	K05026	CLIC6	http://www.genome.jp/dbget-bin/www_bget?ko:K05026	-	-	KOG1422(P)(Intracellular Cl- channel CLIC, contains GST domain)	sp|Q96NY7|CLIC6_HUMAN;sp|Q8BHB9|CLIC6_MOUSE;gnl|BL_ORD_ID|325584;gnl|BL_ORD_ID|325585;sp|Q811Q2|CLIC6_RAT	sp|Q96NY7|CLIC6_HUMAN Chloride intracellular channel protein 6 OS=Homo sapiens GN=CLIC6 PE=2 SV=3;sp|Q8BHB9|CLIC6_MOUSE Chloride intracellular channel protein 6 OS=Mus musculus GN=Clic6 PE=1 SV=1;sp|Q9N2G5|CLIC6_RABIT Chloride intracellular channel protein 6 OS=Oryctolagus cuniculus GN=CLIC6 PE=1 SV=1;sp|Q811Q2|CLIC6_RAT Chloride intracellular channel protein 6 OS=Rattus norvegicus GN=Clic6 PE=1 …
CLIP1	1.05767	1.06595	0.799341	0.749736	0.667453	0.745855	1.06446	1.05115	0.909021	0.819544	0.803457	0.849419	0.869232	0.972666	0.922206	0.730782	0.624282	0.630428	PREDICTED: CAP-Gly domain-containing linker protein 1 isoform X4 [Pelodiscus sinensis];PREDICTED: CAP-Gly domain-containing linker protein 1 isoform X1 [Pelodiscus sinensis];CAP-Gly domain-containing linker protein 1 [Chelonia mydas];PREDICTED: CAP-Gly domain-containing linker protein 1 isoform X3 [Chrysemys picta bellii];PREDICTED: CAP-Gly domain-containing linker protein 1 isoform X2 [Pelodiscu…	-	-	K10421	CLIP1,RSN	http://www.genome.jp/dbget-bin/www_bget?ko:K10421	mTOR signaling pathway	ko04150	KOG4568(ZR)(Cytoskeleton-associated protein and related proteins)	gnl|BL_ORD_ID|331053;sp|O42184|CLIP1_CHICK	sp|O42184|CLIP1_CHICK CAP-Gly domain-containing linker protein 1 OS=Gallus gallus GN=CLIP1 PE=2 SV=1;sp|O42184|CLIP1_CHICK CAP-Gly domain-containing linker protein 1 OS=Gallus gallus GN=CLIP1 PE=2 SV=1
CLIP2	0.570543	0.489958	0.372912	0.832509	1.0141	0.705008	0.905796	0.840106	0.868644	0.993877	0.98945	1.05956	0.471292	0.457882	0.481443	0.571709	0.591065	0.70757	PREDICTED: CAP-Gly domain-containing linker protein 2 isoform X3 [Chrysemys picta bellii];PREDICTED: LOW QUALITY PROTEIN: CAP-Gly domain-containing linker protein 2 [Pelodiscus sinensis];PREDICTED: CAP-Gly domain-containing linker protein 2 isoform X4 [Chrysemys picta bellii]	-	-	K10422	CLIP2,CYLN2	http://www.genome.jp/dbget-bin/www_bget?ko:K10422	-	-	KOG4568(ZR)(Cytoskeleton-associated protein and related proteins)	sp|Q9UDT6|CLIP2_HUMAN;gnl|BL_ORD_ID|327827	sp|Q9UDT6|CLIP2_HUMAN CAP-Gly domain-containing linker protein 2 OS=Homo sapiens GN=CLIP2 PE=1 SV=1;sp|Q9UDT6|CLIP2_HUMAN CAP-Gly domain-containing linker protein 2 OS=Homo sapiens GN=CLIP2 PE=1 SV=1
CLIP3	0.847573	0.725095	0.877371	1.14019	1.15957	0.940018	1.02366	0.975432	1.05805	1.03623	1.05652	1.2235	0.460898	0.463893	0.445604	0.643453	0.579784	0.569374	PREDICTED: CAP-Gly domain-containing linker protein 3 [Pelodiscus sinensis]	GO:0010008;GO:0005886;GO:0045121;GO:0005802	endosome membrane;plasma membrane;membrane raft;trans-Golgi network	K10423	CLIP3_4	http://www.genome.jp/dbget-bin/www_bget?ko:K10423	-	-	KOG4568(ZR)(Cytoskeleton-associated protein and related proteins)	gnl|BL_ORD_ID|335706;sp|Q5U243|CLIP3_XENLA	sp|Q5U243|CLIP3_XENLA CAP-Gly domain-containing linker protein 3 OS=Xenopus laevis GN=clip3 PE=2 SV=1;sp|Q5U243|CLIP3_XENLA CAP-Gly domain-containing linker protein 3 OS=Xenopus laevis GN=clip3 PE=2 SV=1
CLMP	0.585461	0.285557	0.421604	0.695482	0.777427	0.541579	0.941014	0.751279	0.704151	0.793092	0.625312	0.966142	0.130334	0.225309	0.1959	0.307496	0.262451	0.276462	PREDICTED: CXADR-like membrane protein [Chelonia mydas];PREDICTED: CXADR-like membrane protein [Pelodiscus sinensis]	GO:0070062;GO:0005881;GO:0016021;GO:0048565;GO:0016020;GO:0005923;GO:0009986	extracellular exosome;cytoplasmic microtubule;integral component of membrane;digestive tract development;membrane;bicellular tight junction;cell surface	K06789	ASAM,CLMP	http://www.genome.jp/dbget-bin/www_bget?ko:K06789	-	-	-	gnl|BL_ORD_ID|331886;sp|Q9H6B4|CLMP_HUMAN	sp|Q9H6B4|CLMP_HUMAN CXADR-like membrane protein OS=Homo sapiens GN=CLMP PE=1 SV=1;sp|Q9H6B4|CLMP_HUMAN CXADR-like membrane protein OS=Homo sapiens GN=CLMP PE=1 SV=1
CLN5	0.703291	0.750508	0.517196	0.609594	0.685742	0.611723	0.948902	0.770852	0.820858	1.05652	0.721811	0.87564	0.791691	0.865104	0.794488	0.782473	0.700704	0.769377	PREDICTED: ceroid-lipofuscinosis neuronal protein 5 [Pelodiscus sinensis]	GO:0007601;GO:0022008;GO:0005775;GO:0005764;GO:0007040	visual perception;neurogenesis;vacuolar lumen;lysosome;lysosome organization	K12390	CLN5	http://www.genome.jp/dbget-bin/www_bget?ko:K12390	Lysosome	ko04142	-	sp|Q1ZYR0|CLN5_BOVIN;gnl|BL_ORD_ID|330153;sp|Q5JZQ9|CLN5_CANLF	sp|Q1ZYR0|CLN5_BOVIN Ceroid-lipofuscinosis neuronal protein 5 OS=Bos taurus GN=CLN5 PE=2 SV=1;sp|Q5JZQ9|CLN5_CANLF Ceroid-lipofuscinosis neuronal protein 5 OS=Canis lupus familiaris GN=CLN5 PE=2 SV=1;sp|Q5JZQ9|CLN5_CANLF Ceroid-lipofuscinosis neuronal protein 5 OS=Canis lupus familiaris GN=CLN5 PE=2 SV=1
CLRN3	0.778874	0.763428	0.806858	0.350248	0.606381	0.542825	1.12352	1.02078	1.01703	1.05918	0.855519	0.840106	0.607455	1.26647	0.938019	0.594393	0.775974	0.899821	PREDICTED: clarin-3 [Pelodiscus sinensis]	GO:0070062;GO:0016021;GO:0016020	extracellular exosome;integral component of membrane;membrane	-	-	-	-	-	-	gnl|BL_ORD_ID|315688	sp|Q8NCR9|CLRN3_HUMAN Clarin-3 OS=Homo sapiens GN=CLRN3 PE=2 SV=1
CLSPN	0.719331	0.703291	0.658011	0.739572	0.632457	0.658965	0.600973	0.675778	0.666518	0.693727	0.668386	0.804139	0.217484	0.227887	0.245513	0.164353	0.346353	0.30103	PREDICTED: claspin isoform X2 [Pelodiscus sinensis];PREDICTED: claspin isoform X1 [Pelodiscus sinensis];PREDICTED: claspin isoform X3 [Pelodiscus sinensis]	GO:0005737;GO:0005654;GO:0000077;GO:0032147;GO:0033314;GO:0010997;GO:0018105;GO:0031572	cytoplasm;nucleoplasm;DNA damage checkpoint;activation of protein kinase activity;mitotic DNA replication checkpoint;anaphase-promoting complex binding;peptidyl-serine phosphorylation;G2 DNA damage checkpoint	-	-	-	-	-	-	gnl|BL_ORD_ID|330417;sp|Q80YR7|CLSPN_MOUSE	sp|Q80YR7|CLSPN_MOUSE Claspin OS=Mus musculus GN=Clspn PE=1 SV=2;sp|Q80YR7|CLSPN_MOUSE Claspin OS=Mus musculus GN=Clspn PE=1 SV=2
CLSTN2	0.320146	0.383815	0.158362	0.232996	0.167317	0.247973	0.652246	0.577492	0.451786	0.578639	0.518514	0.523746	0.350248	0.201397	0.382017	0.378398	0.340444	0.404834	PREDICTED: calsyntenin-2 [Pelodiscus sinensis]	-	-	-	-	-	-	-	-	gnl|BL_ORD_ID|340610	sp|Q9H4D0|CSTN2_HUMAN Calsyntenin-2 OS=Homo sapiens GN=CLSTN2 PE=1 SV=2
CLTCL1	1.07628	0.966611	0.704151	0.772322	0.664642	0.62941	1.09061	1.05269	0.836324	0.851258	0.860338	0.954725	0.61066	0.686636	0.614897	0.474216	0.466868	0.459392	PREDICTED: clathrin heavy chain 2 isoform X5 [Chrysemys picta bellii];PREDICTED: clathrin heavy chain 2 isoform X1 [Pelodiscus sinensis];PREDICTED: clathrin heavy chain 2 isoform X1 [Chrysemys picta bellii];PREDICTED: clathrin heavy chain 2 isoform X2 [Pelodiscus sinensis];PREDICTED: clathrin heavy chain 2 isoform X2 [Chrysemys picta bellii]	-	-	K04646	CLTC	http://www.genome.jp/dbget-bin/www_bget?ko:K04646	Endocytosis;Lysosome;Endocrine and other factor-regulated calcium reabsorption;Synaptic vesicle cycle	ko04144,ko04142,ko04961,ko04721	KOG0985(U)(Vesicle coat protein clathrin, heavy chain)	sp|Q68FD5|CLH1_MOUSE;gnl|BL_ORD_ID|334932	sp|Q68FD5|CLH1_MOUSE Clathrin heavy chain 1 OS=Mus musculus GN=Cltc PE=1 SV=3;sp|Q68FD5|CLH1_MOUSE Clathrin heavy chain 1 OS=Mus musculus GN=Cltc PE=1 SV=3
CMTM8	1.02202	1.11461	0.983626	0.999565	0.781037	1.09132	0.819544	0.962369	0.874482	0.869818	0.797268	0.756636	0.421604	0.344392	0.240549	0.519828	0.563481	0.491362	PREDICTED: CKLF-like MARVEL transmembrane domain-containing protein 8 [Pelodiscus sinensis]	GO:0005654;GO:0016021;GO:0016020	nucleoplasm;integral component of membrane;membrane	-	-	-	-	-	-	gnl|BL_ORD_ID|330073;sp|Q8IZV2|CKLF8_HUMAN	sp|Q8IZV2|CKLF8_HUMAN CKLF-like MARVEL transmembrane domain-containing protein 8 OS=Homo sapiens GN=CMTM8 PE=1 SV=2;sp|Q8IZV2|CKLF8_HUMAN CKLF-like MARVEL transmembrane domain-containing protein 8 OS=Homo sapiens GN=CMTM8 PE=1 SV=2
CNKSR3	0.738781	0.684845	0.64836	0.756636	0.71265	0.641474	0.713491	0.611723	0.656098	0.731589	0.646404	0.63749	0.356026	0.294466	0.30963	0.540329	0.44248	0.472756	PREDICTED: connector enhancer of kinase suppressor of ras 3 [Pelodiscus sinensis]	-	-	-	-	-	-	-	KOG1738(F)(Membrane-associated guanylate kinase-interacting protein/connector enhancer of KSR-like)	sp|Q6P9H4|CNKR3_HUMAN;sp|Q8BMA3|CNKR3_MOUSE;gnl|BL_ORD_ID|331330	sp|Q6P9H4|CNKR3_HUMAN Connector enhancer of kinase suppressor of ras 3 OS=Homo sapiens GN=CNKSR3 PE=1 SV=1;sp|Q8BMA3|CNKR3_MOUSE Connector enhancer of kinase suppressor of ras 3 OS=Mus musculus GN=Cnksr3 PE=1 SV=1;sp|Q6P9H4|CNKR3_HUMAN Connector enhancer of kinase suppressor of ras 3 OS=Homo sapiens GN=CNKSR3 PE=1 SV=1
CNTN1	0.778874	0.525045	0.729974	0.534026	0.454845	0.501059	0.925828	0.645422	0.550228	0.90309	0.786041	1.01494	0.448706	0.338456	0.33646	0.401401	0.260071	0.257679	PREDICTED: LOW QUALITY PROTEIN: contactin-1 [Chrysemys picta bellii];PREDICTED: contactin-1 isoform X2 [Pelodiscus sinensis];PREDICTED: contactin-1 isoform X1 [Pelodiscus sinensis]	GO:0070062;GO:0007155;GO:0005886;GO:0021549;GO:0007417;GO:0010628;GO:0007409;GO:0010976;GO:0030246;GO:0043209;GO:0010765;GO:0001764;GO:0005515;GO:0007411;GO:0071205;GO:0031225;GO:0031175;GO:0001948	extracellular exosome;cell adhesion;plasma membrane;cerebellum development;central nervous system development;positive regulation of gene expression;axonogenesis;positive regulation of neuron projection development;carbohydrate binding;myelin sheath;positive regulation of sodium ion transport;neuron migration;protein binding;axon guidance;protein localization to juxtaparanode region of axon;ancho…	K06759	CNTN1	http://www.genome.jp/dbget-bin/www_bget?ko:K06759	Cell adhesion molecules (CAMs)	ko04514	KOG3510(T)(FOG: Immunoglobulin C-2 Type/fibronectin type III domains);KOG4222(T)(Axon guidance receptor Dscam)	gnl|BL_ORD_ID|330567;sp|P14781|CNTN1_CHICK	sp|P14781|CNTN1_CHICK Contactin-1 OS=Gallus gallus GN=CNTN1 PE=1 SV=1;sp|P14781|CNTN1_CHICK Contactin-1 OS=Gallus gallus GN=CNTN1 PE=1 SV=1
CNTN3	0.0530784	0.0569049	0.064458	0.206826	0.170262	0.220108	0.30103	0.287802	0.25042	0.481443	0.344392	0.426511	0.25042	0.352183	0.459392	0.305351	0.176091	0.255273	PREDICTED: contactin-3 [Pelodiscus sinensis]	GO:0007155;GO:0007399	cell adhesion;nervous system development	K06761	CNTN3	http://www.genome.jp/dbget-bin/www_bget?ko:K06761	-	-	KOG3513(T)(Neural cell adhesion molecule L1)	gnl|BL_ORD_ID|316365;sp|Q9P232|CNTN3_HUMAN	sp|Q9P232|CNTN3_HUMAN Contactin-3 OS=Homo sapiens GN=CNTN3 PE=1 SV=3;sp|Q9P232|CNTN3_HUMAN Contactin-3 OS=Homo sapiens GN=CNTN3 PE=1 SV=3
CNTN4	0.550228	0.485721	0.507856	0.654177	0.771587	0.658965	0.800717	0.740363	0.748188	0.794488	0.807535	0.788168	0.190332	0.294466	0.31597	0.25042	0.350248	0.33646	PREDICTED: contactin-4 [Pelodiscus sinensis]	-	-	K06762	CNTN4	http://www.genome.jp/dbget-bin/www_bget?ko:K06762	-	-	KOG3510(T)(FOG: Immunoglobulin C-2 Type/fibronectin type III domains);KOG3513(T)(Neural cell adhesion molecule L1)	sp|Q8IWV2|CNTN4_HUMAN;gnl|BL_ORD_ID|332193	sp|Q8IWV2|CNTN4_HUMAN Contactin-4 OS=Homo sapiens GN=CNTN4 PE=1 SV=1;sp|Q8IWV2|CNTN4_HUMAN Contactin-4 OS=Homo sapiens GN=CNTN4 PE=1 SV=1
CNTNAP5	0.127105	0.190332	0.0374265	0.0569049	0.139879	0.100371	0.539076	0.426511	0.245513	0.450249	0.330414	0.342423	0.342423	0.117271	0.201397	0.281033	0.404834	0.32838	PREDICTED: contactin-associated protein-like 5 [Pelodiscus sinensis]	GO:0007155;GO:0016021;GO:0016020	cell adhesion;integral component of membrane;membrane	-	-	-	-	-	KOG3516(T)(Neurexin IV)	sp|Q0V8S9|CNTP5_CHICK;gnl|BL_ORD_ID|330573	sp|Q0V8S9|CNTP5_CHICK Contactin-associated protein-like 5 OS=Gallus gallus GN=CNTNAP5 PE=2 SV=1;sp|Q0V8S9|CNTP5_CHICK Contactin-associated protein-like 5 OS=Gallus gallus GN=CNTNAP5 PE=2 SV=1
COBL	0.701568	0.764923	0.748188	0.489958	0.5302	0.532754	0.778874	0.675778	0.788168	0.758912	0.70757	0.585461	0.552668	0.793092	0.849419	0.640481	0.781755	0.777427	PREDICTED: protein cordon-bleu isoform X3 [Pelodiscus sinensis]<>XP_006136429.1 PREDICTED: protein cordon-bleu isoform X3 [Pelodiscus sinensis]<>XP_014435689.1 PREDICTED: protein cordon-bleu isoform X3 [Pelodiscus sinensis];PREDICTED: protein cordon-bleu isoform X7 [Pelodiscus sinensis];PREDICTED: protein cordon-bleu isoform X6 [Pelodiscus sinensis];PREDICTED: protein cordon-bleu isoform X1 [Pelo…	GO:0030425;GO:0030041;GO:1900029;GO:0044295;GO:0033504;GO:0048669;GO:1900006;GO:0048471;GO:0001843;GO:0001889;GO:0048565;GO:0001726;GO:0016020;GO:0043025;GO:0044294;GO:0003785;GO:0030424;GO:0003779;GO:0005938;GO:0000578;GO:0005884;GO:0051639	dendrite;actin filament polymerization;positive regulation of ruffle assembly;axonal growth cone;floor plate development;collateral sprouting in absence of injury;positive regulation of dendrite development;perinuclear region of cytoplasm;neural tube closure;liver development;digestive tract development;ruffle;membrane;neuronal cell body;dendritic growth cone;actin monomer binding;axon;actin bind…	K18623	COBL	http://www.genome.jp/dbget-bin/www_bget?ko:K18623	-	-	-	sp|O75128|COBL_HUMAN;gnl|BL_ORD_ID|332383;sp|Q5NBX1|COBL_MOUSE;gnl|BL_ORD_ID|314302	sp|O75128|COBL_HUMAN Protein cordon-bleu OS=Homo sapiens GN=COBL PE=1 SV=2;sp|O75128|COBL_HUMAN Protein cordon-bleu OS=Homo sapiens GN=COBL PE=1 SV=2;sp|Q5NBX1|COBL_MOUSE Protein cordon-bleu OS=Mus musculus GN=Cobl PE=1 SV=1;sp|Q5NBX1|COBL_MOUSE Protein cordon-bleu OS=Mus musculus GN=Cobl PE=1 SV=1
COBLL1	0.860937	0.929419	0.885926	0.507856	0.666518	0.64836	0.990339	0.885361	0.923244	0.992554	0.976808	0.85248	0.893207	0.983175	1.10449	0.856124	0.941014	1.04532	PREDICTED: cordon-bleu protein-like 1 [Pelodiscus sinensis]<>XP_014436226.1 PREDICTED: cordon-bleu protein-like 1 [Pelodiscus sinensis]<>XP_006137394.2 PREDICTED: cordon-bleu protein-like 1 [Pelodiscus sinensis]	GO:0070062	extracellular exosome	-	-	-	-	-	-	sp|Q53SF7|COBL1_HUMAN;gnl|BL_ORD_ID|333796	sp|Q53SF7|COBL1_HUMAN Cordon-bleu protein-like 1 OS=Homo sapiens GN=COBLL1 PE=1 SV=2;sp|Q53SF7|COBL1_HUMAN Cordon-bleu protein-like 1 OS=Homo sapiens GN=COBLL1 PE=1 SV=2
COL11A1	0.434569	0.313867	0.305351	0.643453	0.495544	0.55145	0.777427	0.788168	0.552668	0.698101	0.670246	0.951823	0.238046	0.260071	0.170262	0.298853	0.40824	0.326336	PREDICTED: collagen alpha-1(XI) chain isoform X3 [Pelodiscus sinensis];PREDICTED: collagen alpha-1(XI) chain isoform X4 [Pelodiscus sinensis];PREDICTED: collagen alpha-1(XI) chain isoform X1 [Pelodiscus sinensis];PREDICTED: collagen alpha-1(XI) chain isoform X2 [Pelodiscus sinensis]	GO:0030199;GO:0007601;GO:0002063;GO:0001503;GO:0031012;GO:0006029;GO:0050910;GO:0055010;GO:0048705;GO:0005201;GO:0007605;GO:0035989;GO:0051216;GO:0042472;GO:0005581;GO:0005592;GO:0003007;GO:0003674;GO:0005576;GO:0005615;GO:0001502;GO:0048704;GO:0035987;GO:0005578;GO:0046872	collagen fibril organization;visual perception;chondrocyte development;ossification;extracellular matrix;proteoglycan metabolic process;detection of mechanical stimulus involved in sensory perception of sound;ventricular cardiac muscle tissue morphogenesis;skeletal system morphogenesis;extracellular matrix structural constituent;sensory perception of sound;tendon development;cartilage development…	K19721	COL5AS	http://www.genome.jp/dbget-bin/www_bget?ko:K19721	Protein digestion and absorption	ko04974	KOG3544(W)(Collagens (type IV and type XIII), and related proteins)	gnl|BL_ORD_ID|314290;sp|P12107|COBA1_HUMAN	sp|P12107|COBA1_HUMAN Collagen alpha-1(XI) chain OS=Homo sapiens GN=COL11A1 PE=1 SV=4;sp|P12107|COBA1_HUMAN Collagen alpha-1(XI) chain OS=Homo sapiens GN=COL11A1 PE=1 SV=4
COL13A1	0.761928	0.883661	0.840106	0.804139	0.788875	0.881955	0.517196	0.61066	0.638489	0.614897	0.658965	0.606381	0.356026	0.173186	0.201397	0.296665	0.409933	0.475671	PREDICTED: collagen alpha-1(XIII) chain isoform X20 [Pelodiscus sinensis];PREDICTED: collagen alpha-1(XIII) chain isoform X10 [Pelodiscus sinensis];PREDICTED: collagen alpha-1(XIII) chain isoform X18 [Pelodiscus sinensis];PREDICTED: collagen alpha-1(XIII) chain isoform X1 [Chelonia mydas];PREDICTED: collagen alpha-1(XIII) chain isoform X2 [Pelodiscus sinensis];PREDICTED: collagen alpha-1(XIII) ch…	-	-	K16617	COL13A	http://www.genome.jp/dbget-bin/www_bget?ko:K16617	Protein digestion and absorption	ko04974	-	sp|Q5TAT6|CODA1_HUMAN;sp|Q9R1N9|CODA1_MOUSE;gnl|BL_ORD_ID|319680	sp|Q5TAT6|CODA1_HUMAN Collagen alpha-1(XIII) chain OS=Homo sapiens GN=COL13A1 PE=1 SV=1;sp|Q9R1N9|CODA1_MOUSE Collagen alpha-1(XIII) chain OS=Mus musculus GN=Col13a1 PE=2 SV=1;sp|Q9R1N9|CODA1_MOUSE Collagen alpha-1(XIII) chain OS=Mus musculus GN=Col13a1 PE=2 SV=1
COL19A1	0.0827854	0.0606978	0.0293838	0.0606978	0.0334238	0	0.354108	0.274158	0.113943	0.217484	0.193125	0.357935	0.0211893	0.0374265	0.0374265	0.0413927	0.0681859	0.00860017	PREDICTED: collagen alpha-1(XIX) chain isoform X6 [Pelodiscus sinensis];PREDICTED: collagen alpha-1(XIX) chain isoform X1 [Pelodiscus sinensis];PREDICTED: collagen alpha-1(XIX) chain isoform X3 [Pelodiscus sinensis];PREDICTED: collagen alpha-1(XIX) chain isoform X5 [Pelodiscus sinensis]	-	-	-	-	-	-	-	-	sp|Q14993|COJA1_HUMAN;gnl|BL_ORD_ID|316731	sp|Q14993|COJA1_HUMAN Collagen alpha-1(XIX) chain OS=Homo sapiens GN=COL19A1 PE=1 SV=3;sp|Q14993|COJA1_HUMAN Collagen alpha-1(XIX) chain OS=Homo sapiens GN=COL19A1 PE=1 SV=3
COL23A1	0.071882	0.0413927	0.049218	0.434569	0.429752	0.187521	0.342423	0.338456	0.278754	0.510545	0.544068	0.371068	0.0170333	0.0530784	0.0253059	0.445604	0.274158	0.267172	PREDICTED: collagen alpha-1(XXIII) chain [Pelodiscus sinensis];PREDICTED: collagen alpha-1(XXIII) chain isoform X1 [Lepidothrix coronata]	-	-	-	-	-	-	-	-	sp|Q86Y22|CONA1_HUMAN;gnl|BL_ORD_ID|314497	sp|Q86Y22|CONA1_HUMAN Collagen alpha-1(XXIII) chain OS=Homo sapiens GN=COL23A1 PE=1 SV=1;sp|Q86Y22|CONA1_HUMAN Collagen alpha-1(XXIII) chain OS=Homo sapiens GN=COL23A1 PE=1 SV=1
COL24A1	0.338456	0.330414	0.361728	0.555094	0.584331	0.475671	0.532754	0.38739	0.448706	0.385606	0.515874	0.556303	0.045323	0.0899051	0.075547	0.201397	0.217484	0.190332	PREDICTED: collagen alpha-1(XXIV) chain [Pelodiscus sinensis]	-	-	K19721	COL5AS	http://www.genome.jp/dbget-bin/www_bget?ko:K19721	Protein digestion and absorption	ko04974	-	gnl|BL_ORD_ID|317653;sp|Q17RW2|COOA1_HUMAN	sp|Q17RW2|COOA1_HUMAN Collagen alpha-1(XXIV) chain OS=Homo sapiens GN=COL24A1 PE=1 SV=2;sp|Q17RW2|COOA1_HUMAN Collagen alpha-1(XXIV) chain OS=Homo sapiens GN=COL24A1 PE=1 SV=2
COL27A1	0.346353	0.230449	0.5302	0.996512	0.792392	0.361728	0.526339	0.445604	0.431364	0.332438	0.662758	0.542825	0.0934217	0.113943	0.167317	0.113943	0.269513	0.278754	PREDICTED: collagen alpha-1(XXVII) chain isoform X2 [Pelodiscus sinensis];PREDICTED: collagen alpha-1(XXVII) chain isoform X3 [Pelodiscus sinensis];PREDICTED: collagen alpha-1(XXVII) chain isoform X4 [Pelodiscus sinensis];PREDICTED: voltage-dependent N-type calcium channel subunit alpha-1B isoform X2 [Pelodiscus sinensis];PREDICTED: collagen alpha-1(XXVII) chain isoform X1 [Pelodiscus sinensis]	-	-	K04849;K19721	CACNA1B;COL5AS	http://www.genome.jp/dbget-bin/www_bget?ko:K04849;http://www.genome.jp/dbget-bin/www_bget?ko:K19721	Protein digestion and absorption;Calcium signaling pathway;MAPK signaling pathway;Cholinergic synapse;Dopaminergic synapse;GABAergic synapse;Retrograde endocannabinoid signaling;Serotonergic synapse;Synaptic vesicle cycle	ko04974,ko04020,ko04010,ko04725,ko04728,ko04727,ko04723,ko04726,ko04721	KOG2301(PT)(Voltage-gated Ca2+ channels, alpha1 subunits);KOG3544(W)(Collagens (type IV and type XIII), and related proteins)	sp|C0HJN5|CO1A1_HIPAM;gnl|BL_ORD_ID|316390;gnl|BL_ORD_ID|314290;sp|Q00975|CAC1B_HUMAN;gnl|BL_ORD_ID|317420;sp|C0HJP2|CO1A2_CYCDI;sp|O88207|CO5A1_MOUSE;sp|P12107|COBA1_HUMAN;sp|Q9JI03|CO5A1_RAT;gnl|BL_ORD_ID|333107	sp|C0HJN5|CO1A1_HIPAM Collagen alpha-1(I) chain (Fragments) OS=Hippopotamus amphibius GN=COL1A1 PE=1 SV=1;sp|C0HJN5|CO1A1_HIPAM Collagen alpha-1(I) chain (Fragments) OS=Hippopotamus amphibius GN=COL1A1 PE=1 SV=1;sp|P12107|COBA1_HUMAN Collagen alpha-1(XI) chain OS=Homo sapiens GN=COL11A1 PE=1 SV=4;sp|Q00975|CAC1B_HUMAN Voltage-dependent N-type calcium channel subunit alpha-1B OS=Homo sapiens GN=CA…
COL28A1	0.445604	0.100371	0.178977	0.285557	0.474216	0.318063	0.649335	0.445604	0.64836	0.778151	0.586587	1.10992	0.222716	0.262451	0.320146	0.225309	0.243038	0.352183	PREDICTED: collagen alpha-1(XXVIII) chain [Pelodiscus sinensis]	-	-	-	-	-	-	-	KOG4597(O)(Serine proteinase inhibitor (KU family) with thrombospondin repeats)	sp|Q2UY09|COSA1_HUMAN;sp|Q2UY11|COSA1_MOUSE;gnl|BL_ORD_ID|318383	sp|Q2UY09|COSA1_HUMAN Collagen alpha-1(XXVIII) chain OS=Homo sapiens GN=COL28A1 PE=2 SV=2;sp|Q2UY11|COSA1_MOUSE Collagen alpha-1(XXVIII) chain OS=Mus musculus GN=Col28a1 PE=2 SV=1;sp|Q2UY11|COSA1_MOUSE Collagen alpha-1(XXVIII) chain OS=Mus musculus GN=Col28a1 PE=2 SV=1
COL2A1	1.00604	0.869232	1.0306	1.22789	1.20952	1.16346	0.903633	0.844477	0.914343	0.691081	0.841985	0.912222	0.287802	0.220108	0.305351	0.403121	0.523746	0.61066	PREDICTED: LOW QUALITY PROTEIN: collagen alpha-1(II) chain [Pelodiscus sinensis]	-	-	K19719	COL2A	http://www.genome.jp/dbget-bin/www_bget?ko:K19719	Focal adhesion;PI3K-Akt signaling pathway;ECM-receptor interaction;Protein digestion and absorption	ko04510,ko04151,ko04512,ko04974	-	gnl|BL_ORD_ID|333095;sp|P02459|CO2A1_BOVIN	sp|P02459|CO2A1_BOVIN Collagen alpha-1(II) chain OS=Bos taurus GN=COL2A1 PE=1 SV=4;sp|P02459|CO2A1_BOVIN Collagen alpha-1(II) chain OS=Bos taurus GN=COL2A1 PE=1 SV=4
COL8A1	0.630428	0.423246	0.489958	0.380211	0.52763	0.419956	0.90309	0.827369	0.748963	0.591065	0.656098	0.805501	0.305351	0.751279	0.491362	0.33646	0.348305	0.330414	PREDICTED: collagen alpha-1(VIII) chain [Pelodiscus sinensis]<>XP_006130737.1 PREDICTED: collagen alpha-1(VIII) chain [Pelodiscus sinensis]<>XP_006130738.1 PREDICTED: collagen alpha-1(VIII) chain [Pelodiscus sinensis]<>XP_014432795.1 PREDICTED: collagen alpha-1(VIII) chain [Pelodiscus sinensis]	GO:0070062;GO:0010811;GO:0031012;GO:0050673;GO:0005581;GO:0005576;GO:0043231;GO:0035987;GO:0048593	extracellular exosome;positive regulation of cell-substrate adhesion;extracellular matrix;epithelial cell proliferation;collagen trimer;extracellular region;intracellular membrane-bounded organelle;endodermal cell differentiation;camera-type eye morphogenesis	-	-	-	-	-	-	gnl|BL_ORD_ID|333126;sp|P14282|CO8A1_RABIT	sp|P14282|CO8A1_RABIT Collagen alpha-1(VIII) chain OS=Oryctolagus cuniculus GN=COL8A1 PE=2 SV=1;sp|P14282|CO8A1_RABIT Collagen alpha-1(VIII) chain OS=Oryctolagus cuniculus GN=COL8A1 PE=2 SV=1
COL9A3	0.528917	0.127105	0.378398	0.285557	0.546543	0.045323	0.62941	0.64836	0.322219	0.474216	0.346353	0.403121	0.0791812	0.0791812	0.0606978	0.904716	1.19005	1.23654	PREDICTED: collagen alpha-3(IX) chain [Pelodiscus sinensis]	-	-	K08131	COL9A	http://www.genome.jp/dbget-bin/www_bget?ko:K08131	Focal adhesion;PI3K-Akt signaling pathway;ECM-receptor interaction;Protein digestion and absorption	ko04510,ko04151,ko04512,ko04974	-	sp|P32017|CO9A3_CHICK;gnl|BL_ORD_ID|318000	sp|P32017|CO9A3_CHICK Collagen alpha-3(IX) chain OS=Gallus gallus GN=COL9A3 PE=2 SV=1;sp|P32017|CO9A3_CHICK Collagen alpha-3(IX) chain OS=Gallus gallus GN=COL9A3 PE=2 SV=1
COLEC12	0.348305	0.374748	0.528917	0.597695	0.579784	0.50515	0.838849	0.738781	0.498311	0.778151	0.744293	0.979548	0.064458	0.0791812	0.0863598	0.143015	0.255273	0.0899051	PREDICTED: collectin-12 [Pelodiscus sinensis]	GO:0070062;GO:0016021;GO:0034138;GO:0006955;GO:0060355;GO:0016020;GO:0005581;GO:0008329;GO:0006910;GO:0030169;GO:0071360	extracellular exosome;integral component of membrane;toll-like receptor 3 signaling pathway;immune response;positive regulation of cell adhesion molecule production;membrane;collagen trimer;signaling pattern recognition receptor activity;phagocytosis, recognition;low-density lipoprotein particle binding;cellular response to exogenous dsRNA	K10062	COLEC12	http://www.genome.jp/dbget-bin/www_bget?ko:K10062	Phagosome	ko04145	-	sp|Q2LK54|COL12_CHICK;gnl|BL_ORD_ID|317621	sp|Q2LK54|COL12_CHICK Collectin-12 OS=Gallus gallus GN=COLEC12 PE=2 SV=1;sp|Q2LK54|COL12_CHICK Collectin-12 OS=Gallus gallus GN=COLEC12 PE=2 SV=1
COMT	0.841359	0.494155	0.647383	0.389166	0.570543	0.428135	1.1959	0.892095	0.883661	0.697229	0.752816	0.598791	0.748188	1.0216	1.0026	0.460898	0.656098	0.609594	PREDICTED: catechol O-methyltransferase [Pelodiscus sinensis];PREDICTED: catechol O-methyltransferase [Chelonia mydas]<>EMP40284.1 Catechol O-methyltransferase [Chelonia mydas]	GO:0016206;GO:0008171;GO:0000287;GO:0042135;GO:0016740;GO:0032259;GO:0006584;GO:0008168	catechol O-methyltransferase activity;O-methyltransferase activity;magnesium ion binding;neurotransmitter catabolic process;transferase activity;methylation;catecholamine metabolic process;methyltransferase activity	K00545	COMT	http://www.genome.jp/dbget-bin/www_bget?ko:K00545	Tyrosine metabolism;Betalain biosynthesis;Steroid hormone biosynthesis;Dopaminergic synapse	ko00350,ko00965,ko00140,ko04728	KOG1663(Q)(O-methyltransferase)	sp|Q5H879|COMT_HORSE;gnl|BL_ORD_ID|336540	sp|Q5H879|COMT_HORSE Catechol O-methyltransferase OS=Equus caballus GN=COMT PE=2 SV=1;sp|P22734|COMT_RAT Catechol O-methyltransferase OS=Rattus norvegicus GN=Comt PE=1 SV=2
COQ5	1.20249	0.982271	0.805501	0.74351	0.642465	0.721811	1.23629	1.23477	0.996512	1.04689	0.817565	0.974051	0.863323	1.07004	1.03222	0.580925	0.661813	0.678518	PREDICTED: 2-methoxy-6-polyprenyl-1,4-benzoquinol methylase, mitochondrial [Chrysemys picta bellii]	GO:0005739;GO:0008757;GO:0031314;GO:0006744;GO:0032259;GO:0008425;GO:0008168	mitochondrion;S-adenosylmethionine-dependent methyltransferase activity;extrinsic component of mitochondrial inner membrane;ubiquinone biosynthetic process;methylation;2-polyprenyl-6-methoxy-1,4-benzoquinone methyltransferase activity;methyltransferase activity	K06127	COQ5	http://www.genome.jp/dbget-bin/www_bget?ko:K06127	Ubiquinone and other terpenoid-quinone biosynthesis	ko00130	KOG1540(H)(Ubiquinone biosynthesis methyltransferase COQ5)	gnl|BL_ORD_ID|316834	sp|Q5ZLL5|COQ5_CHICK 2-methoxy-6-polyprenyl-1,4-benzoquinol methylase, mitochondrial OS=Gallus gallus GN=COQ5 PE=2 SV=1
CORO2A	0.440909	0.290035	0.396199	0.238046	0.469822	0.350248	0.778151	0.650308	0.549003	0.803457	0.837588	0.631444	0.544068	0.474216	0.580925	0.49276	0.489958	0.61595	PREDICTED: coronin-2A [Pelodiscus sinensis]	-	-	K13887	CORO2	http://www.genome.jp/dbget-bin/www_bget?ko:K13887	-	-	KOG1445(Z)(Tumor-specific antigen (contains WD repeats))	sp|Q32LP9|COR2A_BOVIN;gnl|BL_ORD_ID|319783;sp|Q92828|COR2A_HUMAN	sp|Q32LP9|COR2A_BOVIN Coronin-2A OS=Bos taurus GN=CORO2A PE=2 SV=1;sp|Q92828|COR2A_HUMAN Coronin-2A OS=Homo sapiens GN=CORO2A PE=2 SV=2;sp|Q92828|COR2A_HUMAN Coronin-2A OS=Homo sapiens GN=CORO2A PE=2 SV=2
CPAMD8	0.90309	0.790988	0.912222	0.893207	0.778874	0.999565	0.91169	0.70927	0.720986	0.788875	0.788875	0.788168	0.40654	0.414973	0.5302	0.718502	0.62634	0.591065	PREDICTED: C3 and PZP-like alpha-2-macroglobulin domain-containing protein 8 isoform X2 [Pelodiscus sinensis];PREDICTED: C3 and PZP-like alpha-2-macroglobulin domain-containing protein 8 isoform X1 [Pelodiscus sinensis]<>XP_006122506.1 PREDICTED: C3 and PZP-like alpha-2-macroglobulin domain-containing protein 8 isoform X1 [Pelodiscus sinensis]	-	-	-	-	-	-	-	KOG1366(O)(Alpha-macroglobulin)	gnl|BL_ORD_ID|338865;sp|Q8IZJ3|CPMD8_HUMAN	sp|Q8IZJ3|CPMD8_HUMAN C3 and PZP-like alpha-2-macroglobulin domain-containing protein 8 OS=Homo sapiens GN=CPAMD8 PE=1 SV=2;sp|Q8IZJ3|CPMD8_HUMAN C3 and PZP-like alpha-2-macroglobulin domain-containing protein 8 OS=Homo sapiens GN=CPAMD8 PE=1 SV=2
CPED1	0.049218	0.193125	0.045323	0.217484	0.0899051	0.0827854	0.448706	0.269513	0.274158	0.38739	0.30963	0.49693	0.161368	0.235528	0.120574	0.206826	0.113943	0.305351	PREDICTED: cadherin-like and PC-esterase domain-containing protein 1 isoform X4 [Pelodiscus sinensis];PREDICTED: cadherin-like and PC-esterase domain-containing protein 1 isoform X2 [Pelodiscus sinensis];PREDICTED: cadherin-like and PC-esterase domain-containing protein 1 isoform X3 [Pelodiscus sinensis];PREDICTED: cadherin-like and PC-esterase domain-containing protein 1 isoform X5 [Pelodiscus s…	GO:0016021;GO:0016020;GO:0005783	integral component of membrane;membrane;endoplasmic reticulum	-	-	-	-	-	-	gnl|BL_ORD_ID|338852;sp|A4D0V7|CPED1_HUMAN	sp|A4D0V7|CPED1_HUMAN Cadherin-like and PC-esterase domain-containing protein 1 OS=Homo sapiens GN=CPED1 PE=2 SV=1;sp|A4D0V7|CPED1_HUMAN Cadherin-like and PC-esterase domain-containing protein 1 OS=Homo sapiens GN=CPED1 PE=2 SV=1
CPNE7	0.298853	0.173186	0.466868	0.649335	0.683947	0.670246	0.577492	0.571709	0.795185	0.305351	0.592177	0.559907	0.278754	0.281033	0.276462	0.143015	0.170262	0.146128	PREDICTED: copine-7 [Pelodiscus sinensis]	-	-	-	-	-	-	-	KOG1327(T)(Copine)	gnl|BL_ORD_ID|339859;sp|H1UBN0|CPNE7_RAT	sp|H1UBN0|CPNE7_RAT Copine-7 OS=Rattus norvegicus GN=Cpne7 PE=1 SV=1;sp|H1UBN0|CPNE7_RAT Copine-7 OS=Rattus norvegicus GN=Cpne7 PE=1 SV=1
CPQ	0.352183	0.278754	0.307496	0.220108	0.414973	0.348305	0.684845	0.553883	0.403121	0.608526	0.561101	0.522444	0.583199	0.569374	0.348305	0.803457	0.572872	0.591065	PREDICTED: carboxypeptidase Q [Pelodiscus sinensis]	-	-	K01302	CPQ	http://www.genome.jp/dbget-bin/www_bget?ko:K01302	-	-	-	gnl|BL_ORD_ID|313790;sp|Q5RDN7|CBPQ_PONAB;sp|Q6GQ29|CBPQ_XENLA	sp|Q5RDN7|CBPQ_PONAB Carboxypeptidase Q OS=Pongo abelii GN=CPQ PE=2 SV=1;sp|Q5RDN7|CBPQ_PONAB Carboxypeptidase Q OS=Pongo abelii GN=CPQ PE=2 SV=1;sp|Q6GQ29|CBPQ_XENLA Carboxypeptidase Q OS=Xenopus laevis GN=cpq PE=2 SV=1
CPS1	0.631444	0.783189	0.382017	0.292256	0.374748	0.354108	0.614897	0.498311	0.478566	0.664642	1.93171	0.811575	0.694605	0.739572	0.540329	0.578639	0.789581	0.540329	PREDICTED: carbamoyl-phosphate synthase [ammonia], mitochondrial [Pelodiscus sinensis]	GO:0005737;GO:0003824;GO:0000050;GO:0042645;GO:0005524;GO:0005739;GO:0006541;GO:0045909;GO:0032496;GO:0005980;GO:0004151;GO:0004087;GO:0072341;GO:0004070;GO:0004088;GO:0050667;GO:0006526;GO:0046209;GO:0006207;GO:0019433;GO:0046872	cytoplasm;catalytic activity;urea cycle;mitochondrial nucleoid;ATP binding;mitochondrion;glutamine metabolic process;positive regulation of blood vessel diameter;response to lipopolysaccharide;glycogen catabolic process;dihydroorotase activity;carbamoyl-phosphate synthase (ammonia) activity;modified amino acid binding;aspartate carbamoyltransferase activity;carbamoyl-phosphate synthase (glutamine…	K01948	CPS1	http://www.genome.jp/dbget-bin/www_bget?ko:K01948	Alanine, aspartate and glutamate metabolism;Arginine biosynthesis;Nitrogen metabolism;Biosynthesis of amino acids;Carbon metabolism	ko00250,ko00220,ko00910,ko01230,ko01200	KOG0370(R)(Multifunctional pyrimidine synthesis protein CAD (includes carbamoyl-phophate synthetase, aspartate transcarbamylase, and glutamine amidotransferase));KOG0368(I)(Acetyl-CoA carboxylase)	gnl|BL_ORD_ID|314744;sp|Q8C196|CPSM_MOUSE	sp|Q8C196|CPSM_MOUSE Carbamoyl-phosphate synthase [ammonia], mitochondrial OS=Mus musculus GN=Cps1 PE=1 SV=2;sp|Q8C196|CPSM_MOUSE Carbamoyl-phosphate synthase [ammonia], mitochondrial OS=Mus musculus GN=Cps1 PE=1 SV=2
CRAT	0.893207	0.850646	0.916454	0.628389	0.820201	0.680336	1.29003	1.19728	0.959995	1.13066	1.15957	1.10243	0.585461	0.991226	0.894316	0.699838	0.732394	0.913284	PREDICTED: carnitine O-acetyltransferase isoform X2 [Pelodiscus sinensis];PREDICTED: carnitine O-acetyltransferase isoform X1 [Pelodiscus sinensis]	GO:0005739;GO:0005102;GO:0004092;GO:0016740;GO:0005777;GO:0016746;GO:0019254	mitochondrion;receptor binding;carnitine O-acetyltransferase activity;transferase activity;peroxisome;transferase activity, transferring acyl groups;carnitine metabolic process, CoA-linked	K00624	E2.3.1.7	http://www.genome.jp/dbget-bin/www_bget?ko:K00624	Peroxisome	ko04146	KOG3717(I)(Carnitine O-acyltransferase CRAT)	gnl|BL_ORD_ID|307904;sp|P52826|CACP_COLLI	sp|P52826|CACP_COLLI Carnitine O-acetyltransferase OS=Columba livia GN=CRAT PE=1 SV=1;sp|P52826|CACP_COLLI Carnitine O-acetyltransferase OS=Columba livia GN=CRAT PE=1 SV=1
CREB3L2	0.276462	0.146128	0.146128	0.158362	0.303196	0.0569049	0.79588	0.673942	0.453318	0.726727	0.666518	1.00432	0.187521	0.0530784	0.359835	0.227887	0.330414	0.212188	PREDICTED: cyclic AMP-responsive element-binding protein 3-like protein 2 [Pelodiscus sinensis]	GO:0005654;GO:0045893;GO:0034976;GO:0001077;GO:0051216;GO:0030968;GO:0000978;GO:0002062;GO:0045944;GO:0043565;GO:0044212;GO:0035497;GO:0005783;GO:0003700;GO:0006355;GO:0005634;GO:0006366;GO:0006888	nucleoplasm;positive regulation of transcription, DNA-templated;response to endoplasmic reticulum stress;transcriptional activator activity, RNA polymerase II core promoter proximal region sequence-specific binding;cartilage development;endoplasmic reticulum unfolded protein response;RNA polymerase II core promoter proximal region sequence-specific DNA binding;chondrocyte differentiation;positive…	K09048	CREB3	http://www.genome.jp/dbget-bin/www_bget?ko:K09048	AMPK signaling pathway;PI3K-Akt signaling pathway;TNF signaling pathway;cAMP signaling pathway;cGMP - PKG signaling pathway;Longevity regulating pathway - mammal;Adrenergic signaling in cardiomyocytes;Aldosterone synthesis and secretion;Estrogen signaling pathway;Glucagon signaling pathway;Insulin secretion;Melanogenesis;Thyroid hormone synthesis;Vasopressin-regulated water reabsorption;Cholinerg…	ko04152,ko04151,ko04668,ko04024,ko04022,ko04211,ko04261,ko04925,ko04915,ko04922,ko04911,ko04916,ko04918,ko04962,ko04725,ko04728	-	sp|Q70SY1|CR3L2_HUMAN;gnl|BL_ORD_ID|319003	sp|Q70SY1|CR3L2_HUMAN Cyclic AMP-responsive element-binding protein 3-like protein 2 OS=Homo sapiens GN=CREB3L2 PE=1 SV=3;sp|Q70SY1|CR3L2_HUMAN Cyclic AMP-responsive element-binding protein 3-like protein 2 OS=Homo sapiens GN=CREB3L2 PE=1 SV=3
CRH	0	0.0413927	0	0.136721	0.139879	0.271842	0.710117	0.686636	0.198657	1.14208	1.03902	0.799341	1.45255	1.306	1.76708	1.51799	0.987666	1.05767	PREDICTED: corticoliberin [Pelodiscus sinensis]<>XP_006131528.1 PREDICTED: corticoliberin [Pelodiscus sinensis]	GO:0051464;GO:0005179;GO:0030325;GO:0001963;GO:0035641;GO:0006704;GO:2000310;GO:0030324;GO:0005576;GO:0006954;GO:0005615	positive regulation of cortisol secretion;hormone activity;adrenal gland development;synaptic transmission, dopaminergic;locomotory exploration behavior;glucocorticoid biosynthetic process;regulation of NMDA receptor activity;lung development;extracellular region;inflammatory response;extracellular space	K05256	CRH	http://www.genome.jp/dbget-bin/www_bget?ko:K05256	Long-term depression	ko04730	-	gnl|BL_ORD_ID|320203;sp|P06296|CRF_PIG	sp|P06296|CRF_PIG Corticoliberin OS=Sus scrofa GN=CRH PE=1 SV=3;sp|P06296|CRF_PIG Corticoliberin OS=Sus scrofa GN=CRH PE=1 SV=3
CRISPLD1	0.495544	0.439333	0.528917	0.676694	0.823474	0.588832	0.865104	0.879669	0.699838	0.872739	0.822822	0.85248	0.167317	0.294466	0.173186	0.403121	0.4843	0.303196	PREDICTED: cysteine-rich secretory protein LCCL domain-containing 1 [Pelodiscus sinensis]	GO:0070062;GO:0060325;GO:0005576	extracellular exosome;face morphogenesis;extracellular region	-	-	-	-	-	KOG3017(S)(Defense-related protein containing SCP domain)	sp|Q98ST5|CRLD1_CHICK;gnl|BL_ORD_ID|340420	sp|Q98ST5|CRLD1_CHICK Cysteine-rich secretory protein LCCL domain-containing 1 OS=Gallus gallus GN=CRISPLD1 PE=2 SV=1;sp|Q98ST5|CRLD1_CHICK Cysteine-rich secretory protein LCCL domain-containing 1 OS=Gallus gallus GN=CRISPLD1 PE=2 SV=1
CRTAP	0.827369	0.884795	0.775974	0.958086	0.989005	0.840106	0.983175	1.12123	1.08565	1.15351	0.941014	1.36698	0.39794	0.324282	0.178977	0.238046	0.401401	0.396199	PREDICTED: cartilage-associated protein isoform X2 [Chrysemys picta bellii];PREDICTED: cartilage-associated protein isoform X1 [Chrysemys picta bellii];PREDICTED: RNA-directed DNA polymerase from mobile element jockey-like [Nanorana parkeri]	-	-	K19606	CRTAP	http://www.genome.jp/dbget-bin/www_bget?ko:K19606	-	-	-	sp|Q9CYD3|CRTAP_MOUSE;gnl|BL_ORD_ID|344415;sp|O75718|CRTAP_HUMAN	sp|Q9CYD3|CRTAP_MOUSE Cartilage-associated protein OS=Mus musculus GN=Crtap PE=1 SV=3;sp|O75718|CRTAP_HUMAN Cartilage-associated protein OS=Homo sapiens GN=CRTAP PE=1 SV=1;sp|O75718|CRTAP_HUMAN Cartilage-associated protein OS=Homo sapiens GN=CRTAP PE=1 SV=1
CSF1	0.40824	0.232996	0.431364	0.757396	0.895975	0.677607	0.794488	0.652246	0.695482	0.737987	0.789581	0.770115	0.536558	0.691965	0.50515	0.465383	0.49693	0.575188	PREDICTED: macrophage colony-stimulating factor 1 isoform X1 [Pelodiscus sinensis]<>XP_006132474.1 PREDICTED: macrophage colony-stimulating factor 1 isoform X2 [Pelodiscus sinensis]<>XP_014433718.1 PREDICTED: macrophage colony-stimulating factor 1 isoform X1 [Pelodiscus sinensis];PREDICTED: macrophage colony-stimulating factor 1 isoform X2 [Chrysemys picta bellii]	GO:0010744;GO:0008083;GO:0030335;GO:0032270;GO:0042488;GO:0070062;GO:0032946;GO:0001954;GO:0003006;GO:0010759;GO:0007169;GO:0002158;GO:0048471;GO:0016021;GO:0016020;GO:0005157;GO:0042803;GO:0005615;GO:1990682;GO:0005125	positive regulation of macrophage derived foam cell differentiation;growth factor activity;positive regulation of cell migration;positive regulation of cellular protein metabolic process;positive regulation of odontogenesis of dentin-containing tooth;extracellular exosome;positive regulation of mononuclear cell proliferation;positive regulation of cell-matrix adhesion;developmental process involv…	K05453	CSF1,MCSF	http://www.genome.jp/dbget-bin/www_bget?ko:K05453	PI3K-Akt signaling pathway;Rap1 signaling pathway;Ras signaling pathway;TNF signaling pathway;Cytokine-cytokine receptor interaction;Osteoclast differentiation;Hematopoietic cell lineage	ko04151,ko04015,ko04014,ko04668,ko04060,ko04380,ko04640	-	gnl|BL_ORD_ID|345038;sp|P07141|CSF1_MOUSE	sp|P07141|CSF1_MOUSE Macrophage colony-stimulating factor 1 OS=Mus musculus GN=Csf1 PE=1 SV=2;sp|P07141|CSF1_MOUSE Macrophage colony-stimulating factor 1 OS=Mus musculus GN=Csf1 PE=1 SV=2
CSF1R	0.247973	0.25042	0.344392	0.32838	0.432969	0.290035	0.673021	0.574031	0.585461	0.942008	0.687529	0.804821	0.170262	0.354108	0.127105	0.252853	0.146128	0.149219	PREDICTED: macrophage colony-stimulating factor 1 receptor [Pelodiscus sinensis]	GO:0030335;GO:0019903;GO:0045217;GO:0021772;GO:0004672;GO:0071345;GO:0008285;GO:0005622;GO:0008360;GO:0036006;GO:0005524;GO:0007169;GO:0005886;GO:0019955;GO:0016310;GO:0030316;GO:0004714;GO:0016301;GO:0016740;GO:0016021;GO:0005011;GO:0016020;GO:0000166;GO:0042803;GO:1990682;GO:0009986	positive regulation of cell migration;protein phosphatase binding;cell-cell junction maintenance;olfactory bulb development;protein kinase activity;cellular response to cytokine stimulus;negative regulation of cell proliferation;intracellular;regulation of cell shape;cellular response to macrophage colony-stimulating factor stimulus;ATP binding;transmembrane receptor protein tyrosine kinase signa…	K05090	CSF1R,FMS	http://www.genome.jp/dbget-bin/www_bget?ko:K05090	Endocytosis;PI3K-Akt signaling pathway;Rap1 signaling pathway;Ras signaling pathway;Cytokine-cytokine receptor interaction;Osteoclast differentiation;Hematopoietic cell lineage	ko04144,ko04151,ko04015,ko04014,ko04060,ko04380,ko04640	KOG0200(T)(Fibroblast/platelet-derived growth factor receptor and related receptor tyrosine kinases)	gnl|BL_ORD_ID|340460	sp|P07333|CSF1R_HUMAN Macrophage colony-stimulating factor 1 receptor OS=Homo sapiens GN=CSF1R PE=1 SV=2
CSF3R	0.049218	0.0530784	0.045323	0.0374265	0.064458	0.0253059	0.10721	0.146128	0.0863598	0.502427	0.152288	0.404834	0.11059	0.0681859	0.0128372	0.130334	0.0293838	0.0334238	PREDICTED: granulocyte colony-stimulating factor receptor [Pelodiscus sinensis]	-	-	K05061	CSF3R	http://www.genome.jp/dbget-bin/www_bget?ko:K05061	Jak-STAT signaling pathway;PI3K-Akt signaling pathway;Cytokine-cytokine receptor interaction;Hematopoietic cell lineage	ko04630,ko04151,ko04060,ko04640	KOG3510(T)(FOG: Immunoglobulin C-2 Type/fibronectin type III domains)	gnl|BL_ORD_ID|343601	sp|Q99062|CSF3R_HUMAN Granulocyte colony-stimulating factor receptor OS=Homo sapiens GN=CSF3R PE=1 SV=1
CSPG4	0.198657	0.0681859	0.103804	0.298853	0.292256	0.222716	0.346353	0.292256	0.220108	0.361728	0.322219	0.509203	0.045323	0.0530784	0.0293838	0.0211893	0.0170333	0.0569049	PREDICTED: chondroitin sulfate proteoglycan 4 [Pelodiscus sinensis]	-	-	K08115	CSPG4	http://www.genome.jp/dbget-bin/www_bget?ko:K08115	-	-	KOG3597(R)(Proteoglycan)	gnl|BL_ORD_ID|343676;sp|Q6UVK1|CSPG4_HUMAN	sp|Q6UVK1|CSPG4_HUMAN Chondroitin sulfate proteoglycan 4 OS=Homo sapiens GN=CSPG4 PE=1 SV=2;sp|Q6UVK1|CSPG4_HUMAN Chondroitin sulfate proteoglycan 4 OS=Homo sapiens GN=CSPG4 PE=1 SV=2
CSPG5	1.17493	1.0086	1.12808	1.60477	1.28892	1.20358	1.10857	1.14551	1.07078	0.96426	1.15987	1.25406	0.143015	0.33646	0.260071	0.638489	0.647383	0.703291	PREDICTED: chondroitin sulfate proteoglycan 5 [Chrysemys picta bellii];PREDICTED: LOW QUALITY PROTEIN: chondroitin sulfate proteoglycan 5 [Pelodiscus sinensis]	-	-	K08116	CSPG5	http://www.genome.jp/dbget-bin/www_bget?ko:K08116	-	-	-	sp|O95196|CSPG5_HUMAN;gnl|BL_ORD_ID|340081	sp|O95196|CSPG5_HUMAN Chondroitin sulfate proteoglycan 5 OS=Homo sapiens GN=CSPG5 PE=1 SV=3;sp|O95196|CSPG5_HUMAN Chondroitin sulfate proteoglycan 5 OS=Homo sapiens GN=CSPG5 PE=1 SV=3
CSRNP1	0.647383	0.783189	0.630428	0.705008	0.763428	0.577492	1.03423	0.952792	0.883661	1.01578	0.96426	1.00043	0.724276	0.608526	0.696356	0.729165	0.693727	0.764176	PREDICTED: LOW QUALITY PROTEIN: cysteine/serine-rich nuclear protein 1 [Pelodiscus sinensis]	-	-	K17494	CSRNP	http://www.genome.jp/dbget-bin/www_bget?ko:K17494	-	-	-	gnl|BL_ORD_ID|345987;sp|Q96S65|CSRN1_HUMAN	sp|Q96S65|CSRN1_HUMAN Cysteine/serine-rich nuclear protein 1 OS=Homo sapiens GN=CSRNP1 PE=1 SV=2;sp|Q96S65|CSRN1_HUMAN Cysteine/serine-rich nuclear protein 1 OS=Homo sapiens GN=CSRNP1 PE=1 SV=2
CTBP2	0.820201	0.683947	0.647383	0.778874	0.819544	0.758155	0.872739	0.899273	0.873321	0.93044	0.898725	0.996949	0.359835	0.372912	0.389166	0.416641	0.460898	0.431364	PREDICTED: C-terminal-binding protein 2 isoform X4 [Pelodiscus sinensis];PREDICTED: C-terminal-binding protein 2 isoform X3 [Pelodiscus sinensis]<>XP_014435555.1 PREDICTED: C-terminal-binding protein 2 isoform X3 [Pelodiscus sinensis];PREDICTED: C-terminal-binding protein 2 isoform X1 [Pelodiscus sinensis]<>XP_014435551.1 PREDICTED: C-terminal-binding protein 2 isoform X1 [Pelodiscus sinensis]<>X…	GO:0008152;GO:0097470;GO:0003682;GO:0045892;GO:0042974;GO:0048386;GO:0003714;GO:0035563;GO:0045202;GO:0045944;GO:0055114;GO:0017053;GO:0016616;GO:0050872;GO:0005634;GO:0051287;GO:0003713	metabolic process;ribbon synapse;chromatin binding;negative regulation of transcription, DNA-templated;retinoic acid receptor binding;positive regulation of retinoic acid receptor signaling pathway;transcription corepressor activity;positive regulation of chromatin binding;synapse;positive regulation of transcription from RNA polymerase II promoter;oxidation-reduction process;transcriptional repr…	K04496	CTBP	http://www.genome.jp/dbget-bin/www_bget?ko:K04496	Notch signaling pathway;Wnt signaling pathway	ko04330,ko04310	KOG0068(E)(D-3-phosphoglycerate dehydrogenase, D-isomer-specific 2-hydroxy acid dehydrogenase superfamily)	gnl|BL_ORD_ID|346614;sp|P56545|CTBP2_HUMAN	sp|P56545|CTBP2_HUMAN C-terminal-binding protein 2 OS=Homo sapiens GN=CTBP2 PE=1 SV=1;sp|P56545|CTBP2_HUMAN C-terminal-binding protein 2 OS=Homo sapiens GN=CTBP2 PE=1 SV=1
CTC1	1.30578	1.20112	1.21748	1.31069	1.22789	1.4221	1.23223	1.07482	1.14983	1.2615	1.15442	1.25139	0.781755	0.89098	0.805501	0.932981	0.903633	0.886491	PREDICTED: CST complex subunit CTC1 isoform X5 [Pelodiscus sinensis];PREDICTED: CST complex subunit CTC1 isoform X3 [Pelodiscus sinensis];PREDICTED: CST complex subunit CTC1 isoform X4 [Pelodiscus sinensis];PREDICTED: CST complex subunit CTC1 isoform X1 [Pelodiscus sinensis]<>XP_014433960.1 PREDICTED: CST complex subunit CTC1 isoform X1 [Pelodiscus sinensis];PREDICTED: CST complex subunit CTC1 is…	GO:0048146;GO:0051974;GO:0048539;GO:0048536;GO:1904356;GO:0045740;GO:0010389;GO:0016021;GO:0006974;GO:0048538;GO:0051276;GO:0010521;GO:0016020;GO:0042162;GO:0000784;GO:0003697;GO:0005634;GO:1990879;GO:0098505	positive regulation of fibroblast proliferation;negative regulation of telomerase activity;bone marrow development;spleen development;regulation of telomere maintenance via telomere lengthening;positive regulation of DNA replication;regulation of G2/M transition of mitotic cell cycle;integral component of membrane;cellular response to DNA damage stimulus;thymus development;chromosome organization…	-	-	-	-	-	-	gnl|BL_ORD_ID|343785;sp|Q2NKJ3|CTC1_HUMAN;gnl|BL_ORD_ID|343784;sp|A0JMF1|CTC1_DANRE;sp|Q5RDX3|CTC1_PONAB;gnl|BL_ORD_ID|337349	sp|Q2NKJ3|CTC1_HUMAN CST complex subunit CTC1 OS=Homo sapiens GN=CTC1 PE=1 SV=2;sp|Q2NKJ3|CTC1_HUMAN CST complex subunit CTC1 OS=Homo sapiens GN=CTC1 PE=1 SV=2;sp|A0JMF1|CTC1_DANRE CST complex subunit CTC1 OS=Danio rerio GN=ctc1 PE=2 SV=1;sp|A0JMF1|CTC1_DANRE CST complex subunit CTC1 OS=Danio rerio GN=ctc1 PE=2 SV=1;sp|Q5RDX3|CTC1_PONAB CST complex subunit CTC1 OS=Pongo abelii GN=CTC1 PE=2 SV=1;s…
CTGF	0.783904	0.766413	0.822168	0.836324	0.754348	0.877371	0.963788	0.857935	0.876795	1.10721	0.914343	0.924796	1.12352	1.20412	1.01368	0.959995	0.655138	0.850033	PREDICTED: connective tissue growth factor, partial [Anser cygnoides domesticus]	-	-	K06827	CTGF	http://www.genome.jp/dbget-bin/www_bget?ko:K06827	Apelin signaling pathway;Hippo signaling pathway	ko04371,ko04390	-	gnl|BL_ORD_ID|340200;sp|P29268|CTGF_MOUSE	sp|O19113|CTGF_PIG Connective tissue growth factor OS=Sus scrofa GN=CTGF PE=2 SV=1;sp|P29268|CTGF_MOUSE Connective tissue growth factor OS=Mus musculus GN=Ctgf PE=2 SV=3
CTNNAL1	0.992995	0.936011	0.855519	0.952792	0.992995	0.904716	1.03543	1.15655	1.03141	1.11694	1.16613	1.09377	0.633468	0.624282	0.5302	0.624282	0.673942	0.598791	PREDICTED: alpha-catulin [Pelodiscus sinensis];Alpha-catulin, partial [Chelonia mydas]	GO:0051015;GO:0007155;GO:0045296;GO:0005829;GO:0007266	actin filament binding;cell adhesion;cadherin binding;cytosol;Rho protein signal transduction	-	-	-	-	-	-	sp|Q9UBT7|CTNL1_HUMAN;gnl|BL_ORD_ID|343794;sp|Q5RC06|CTNL1_PONAB	sp|Q9UBT7|CTNL1_HUMAN Alpha-catulin OS=Homo sapiens GN=CTNNAL1 PE=1 SV=2;sp|Q5RC06|CTNL1_PONAB Alpha-catulin OS=Pongo abelii GN=CTNNAL1 PE=2 SV=1;sp|Q5RC06|CTNL1_PONAB Alpha-catulin OS=Pongo abelii GN=CTNNAL1 PE=2 SV=1
CTXN1	0.70927	0.361728	0.344392	0.766413	1.13672	0.951823	0.925312	0.904174	0.95376	1.01703	0.955688	1.27508	0.311754	0.264818	0.330414	0.457882	0.392697	0.431364	PREDICTED: cortexin-1 [Pelodiscus sinensis]	GO:0031224;GO:0016021;GO:0016020	intrinsic component of membrane;integral component of membrane;membrane	-	-	-	-	-	-	gnl|BL_ORD_ID|338663;sp|P60606|CTXN1_HUMAN	sp|P60606|CTXN1_HUMAN Cortexin-1 OS=Homo sapiens GN=CTXN1 PE=3 SV=1;sp|P60606|CTXN1_HUMAN Cortexin-1 OS=Homo sapiens GN=CTXN1 PE=3 SV=1
CUX2	0.862728	0.660865	0.71433	1.08884	0.70757	0.742725	0.952792	0.873321	0.701568	0.595496	0.586587	0.731589	0.367356	0.401401	0.33646	0.363612	0.25042	0.283301	PREDICTED: homeobox protein cut-like 2 [Pelodiscus sinensis]	-	-	K09313	CUTL	http://www.genome.jp/dbget-bin/www_bget?ko:K09313	-	-	KOG2252(K)(CCAAT displacement protein and related homeoproteins);KOG0963(K)(Transcription factor/CCAAT displacement protein CDP1)	gnl|BL_ORD_ID|348064;sp|O14529|CUX2_HUMAN	sp|O14529|CUX2_HUMAN Homeobox protein cut-like 2 OS=Homo sapiens GN=CUX2 PE=1 SV=4;sp|O14529|CUX2_HUMAN Homeobox protein cut-like 2 OS=Homo sapiens GN=CUX2 PE=1 SV=4
CWF19L2	1.38632	1.51706	1.49665	0.957128	0.819544	1.09096	1.00173	0.939519	1.03141	1.09656	0.994757	1.11992	0.840106	0.946943	0.830589	0.799341	0.875061	0.944483	PREDICTED: LOW QUALITY PROTEIN: CWF19-like protein 2 [Pelodiscus sinensis]	-	-	-	-	-	-	-	KOG2477(S)(Uncharacterized conserved protein);KOG2476(S)(Uncharacterized conserved protein)	gnl|BL_ORD_ID|312976;sp|Q2TBE0|C19L2_HUMAN	sp|Q2TBE0|C19L2_HUMAN CWF19-like protein 2 OS=Homo sapiens GN=CWF19L2 PE=1 SV=4;sp|Q2TBE0|C19L2_HUMAN CWF19-like protein 2 OS=Homo sapiens GN=CWF19L2 PE=1 SV=4
CX3CL1	0.365488	0.776701	0.62941	0.39794	0.454845	0.149219	0.478566	0.761928	0.715167	0.893207	1.30728	0.834421	1.18127	1.02119	1.52802	0.62941	1.41681	1.1486	PREDICTED: fractalkine-like, partial [Pelodiscus sinensis]	-	-	K05508	CX3CL1,NTT	http://www.genome.jp/dbget-bin/www_bget?ko:K05508	TNF signaling pathway;Cytokine-cytokine receptor interaction;Chemokine signaling pathway	ko04668,ko04060,ko04062	-	sp|P78423|X3CL1_HUMAN;gnl|BL_ORD_ID|519550	sp|P78423|X3CL1_HUMAN Fractalkine OS=Homo sapiens GN=CX3CL1 PE=1 SV=1;sp|P78423|X3CL1_HUMAN Fractalkine OS=Homo sapiens GN=CX3CL1 PE=1 SV=1
CXCL14	0.262451	0.472756	0.378398	0.421604	0.605305	0.359835	0.655138	0.620136	0.885361	0.754348	0.842609	0.658965	1.11059	0.871573	1.00903	0.804139	0.850033	1.06333	PREDICTED: C-X-C motif chemokine 14 [Pelodiscus sinensis]	GO:0007267;GO:0060326;GO:0048839;GO:0006955;GO:0045662;GO:0005576;GO:0008009;GO:2000503;GO:0005794	cell-cell signaling;cell chemotaxis;inner ear development;immune response;negative regulation of myoblast differentiation;extracellular region;chemokine activity;positive regulation of natural killer cell chemotaxis;Golgi apparatus	K10033	CXCL14,SCYB14	http://www.genome.jp/dbget-bin/www_bget?ko:K10033	Cytokine-cytokine receptor interaction;Chemokine signaling pathway	ko04060,ko04062	-	gnl|BL_ORD_ID|347233	sp|Q9WUQ5|CXL14_MOUSE C-X-C motif chemokine 14 OS=Mus musculus GN=Cxcl14 PE=2 SV=2
CYFIP2	0.824126	0.651278	0.636488	0.862728	0.846955	0.710963	0.948413	0.818885	0.777427	0.824776	0.856729	0.922206	0.380211	0.33646	0.367356	0.622214	0.462398	0.572872	PREDICTED: cytoplasmic FMR1-interacting protein 2 [Pelodiscus sinensis]	GO:0005737;GO:0070062;GO:0097202;GO:0048471;GO:0045202;GO:0016020;GO:0016337;GO:0006915;GO:0045862	cytoplasm;extracellular exosome;activation of cysteine-type endopeptidase activity;perinuclear region of cytoplasm;synapse;membrane;single organismal cell-cell adhesion;apoptotic process;positive regulation of proteolysis	K05749	CYFIP	http://www.genome.jp/dbget-bin/www_bget?ko:K05749	Regulation of actin cytoskeleton;RNA transport	ko04810,ko03013	KOG3534(R)(p53 inducible protein PIR121)	sp|Q5SQX6|CYFP2_MOUSE;gnl|BL_ORD_ID|345581	sp|Q5SQX6|CYFP2_MOUSE Cytoplasmic FMR1-interacting protein 2 OS=Mus musculus GN=Cyfip2 PE=1 SV=2;sp|Q5SQX6|CYFP2_MOUSE Cytoplasmic FMR1-interacting protein 2 OS=Mus musculus GN=Cyfip2 PE=1 SV=2
CYSLTR1	0.260071	0.290035	0.39794	0.155336	0.30103	0.209515	0.770115	0.52763	0.502427	0.612784	0.64836	0.509203	0.283301	0.311754	0.350248	0.11059	0.214844	0.348305	PREDICTED: cysteinyl leukotriene receptor 1 [Pelodiscus sinensis]	GO:0016020;GO:0007166;GO:0005887;GO:0006935;GO:0006816;GO:0004930;GO:0061737;GO:0016021;GO:0004974;GO:0007186	membrane;cell surface receptor signaling pathway;integral component of plasma membrane;chemotaxis;calcium ion transport;G-protein coupled receptor activity;leukotriene signaling pathway;integral component of membrane;leukotriene receptor activity;G-protein coupled receptor signaling pathway	K04322	CYSLTR1	http://www.genome.jp/dbget-bin/www_bget?ko:K04322	Calcium signaling pathway;Neuroactive ligand-receptor interaction	ko04020,ko04080	-	gnl|BL_ORD_ID|335842;sp|Q9Y271|CLTR1_HUMAN	sp|Q9Y271|CLTR1_HUMAN Cysteinyl leukotriene receptor 1 OS=Homo sapiens GN=CYSLTR1 PE=1 SV=1;sp|Q9Y271|CLTR1_HUMAN Cysteinyl leukotriene receptor 1 OS=Homo sapiens GN=CYSLTR1 PE=1 SV=1
DACH2	0.801404	1.0141	1.08171	1.08636	1.18184	1.06333	1.07664	1.06633	1.05538	0.827369	0.862728	1.17231	0.545307	0.401401	0.451786	0.868644	0.594393	0.725095	PREDICTED: dachshund homolog 2 isoform X2 [Pelodiscus sinensis];PREDICTED: dachshund homolog 2 isoform X3 [Pelodiscus sinensis];PREDICTED: dachshund homolog 2, partial [Gekko japonicus];PREDICTED: dachshund homolog 2 isoform X2 [Melopsittacus undulatus];PREDICTED: dachshund homolog 2 isoform X1 [Pelodiscus sinensis]	-	-	-	-	-	-	-	KOG3915(K)(Transcription regulator dachshund, contains SKI/SNO domain)	sp|Q925Q8|DACH2_MOUSE;gnl|BL_ORD_ID|349247	sp|Q925Q8|DACH2_MOUSE Dachshund homolog 2 OS=Mus musculus GN=Dach2 PE=1 SV=1;sp|Q925Q8|DACH2_MOUSE Dachshund homolog 2 OS=Mus musculus GN=Dach2 PE=1 SV=1
DACT2	1.27393	1.37014	1.28937	1.36154	1.35603	1.34792	1.21537	1.24105	1.37912	1.33526	1.29929	1.32325	0.717671	0.607455	0.564666	0.781037	0.825426	0.854913	PREDICTED: dapper homolog 2 [Pelodiscus sinensis]	-	-	-	-	-	-	-	-	sp|Q5SW24|DACT2_HUMAN;gnl|BL_ORD_ID|348365	sp|Q5SW24|DACT2_HUMAN Dapper homolog 2 OS=Homo sapiens GN=DACT2 PE=2 SV=1;sp|Q7TN08|DACT2_MOUSE Dapper homolog 2 OS=Mus musculus GN=Dact2 PE=1 SV=2
DAGLA	0.238046	0.230449	0.187521	0.217484	0.378398	0.225309	0.568202	0.414973	0.245513	0.586587	0.627366	0.536558	0.278754	0.394452	0.454845	0.292256	0.344392	0.462398	PREDICTED: sn1-specific diacylglycerol lipase alpha, partial [Pelodiscus sinensis];PREDICTED: sn1-specific diacylglycerol lipase alpha isoform X1 [Python bivittatus]	GO:0016020;GO:0019369;GO:0043196;GO:0022008;GO:0016787;GO:0042136;GO:0006629;GO:0007405;GO:0016021;GO:0046340;GO:0071926	membrane;arachidonic acid metabolic process;varicosity;neurogenesis;hydrolase activity;neurotransmitter biosynthetic process;lipid metabolic process;neuroblast proliferation;integral component of membrane;diacylglycerol catabolic process;endocannabinoid signaling pathway	K13806	DAGL	http://www.genome.jp/dbget-bin/www_bget?ko:K13806	Aldosterone synthesis and secretion;Retrograde endocannabinoid signaling;Phototransduction - fly	ko04925,ko04723,ko04745	KOG2088(IOT)(Predicted lipase/calmodulin-binding heat-shock protein)	sp|Q9Y4D2|DGLA_HUMAN;gnl|BL_ORD_ID|350500	sp|Q9Y4D2|DGLA_HUMAN Sn1-specific diacylglycerol lipase alpha OS=Homo sapiens GN=DAGLA PE=1 SV=3;sp|Q9Y4D2|DGLA_HUMAN Sn1-specific diacylglycerol lipase alpha OS=Homo sapiens GN=DAGLA PE=1 SV=3
DAZL	0.238046	0	0.130334	0.437751	1.09132	0.4133	0.20412	0.232996	0.683047	0.729165	0.753583	0.70757	0	0.0211893	0	0.348305	0.494155	0.161368	PREDICTED: deleted in azoospermia-like [Chrysemys picta bellii]	-	-	-	-	-	-	-	KOG0118(R)(FOG: RRM domain);KOG4205(A)(RNA-binding protein musashi/mRNA cleavage and polyadenylation factor I complex, subunit HRP1)	sp|Q804A9|DAZL_CHICK;sp|Q9BGN8|DAZL_CALJA;gnl|BL_ORD_ID|351570	sp|Q804A9|DAZL_CHICK Deleted in azoospermia-like OS=Gallus gallus GN=DAZL PE=2 SV=1;sp|Q9BGN8|DAZL_CALJA Deleted in azoospermia-like OS=Callithrix jacchus GN=DAZL PE=2 SV=1;sp|Q804A9|DAZL_CHICK Deleted in azoospermia-like OS=Gallus gallus GN=DAZL PE=2 SV=1
DCBLD2	0.775246	0.802089	0.582063	0.723456	0.767156	0.699838	1.0086	0.946943	0.919078	1.03782	0.982271	1.08279	0.562293	0.779596	0.673021	0.675778	0.604226	0.729165	PREDICTED: discoidin, CUB and LCCL domain-containing protein 2 isoform X1 [Pelodiscus sinensis];PREDICTED: discoidin, CUB and LCCL domain-containing protein 2 isoform X2 [Pelodiscus sinensis]	-	-	-	-	-	-	-	-	sp|Q96PD2|DCBD2_HUMAN;gnl|BL_ORD_ID|350671;sp|Q91ZV3|DCBD2_MOUSE	sp|Q96PD2|DCBD2_HUMAN Discoidin, CUB and LCCL domain-containing protein 2 OS=Homo sapiens GN=DCBLD2 PE=1 SV=1;sp|Q96PD2|DCBD2_HUMAN Discoidin, CUB and LCCL domain-containing protein 2 OS=Homo sapiens GN=DCBLD2 PE=1 SV=1;sp|Q91ZV3|DCBD2_MOUSE Discoidin, CUB and LCCL domain-containing protein 2 OS=Mus musculus GN=Dcbld2 PE=1 SV=1
DCHS2	0.519828	0.491362	0.563481	0.745075	0.499687	0.460898	0.394452	0.465383	0.539076	0.423246	0.491362	0.507856	0.0863598	0.0606978	0.198657	0.0681859	0.139879	0.136721	PREDICTED: protocadherin-23 [Pelodiscus sinensis]	-	-	K16507	DCHS1_2,PCDH16_23	http://www.genome.jp/dbget-bin/www_bget?ko:K16507	Hippo signaling pathway - multiple species;Hippo signaling pathway -fly	ko04392,ko04391	KOG4289(T)(Cadherin EGF LAG seven-pass G-type receptor)	sp|Q6V1P9|PCD23_HUMAN;gnl|BL_ORD_ID|117217;sp|E9PVD3|PCD16_MOUSE	sp|Q6V1P9|PCD23_HUMAN Protocadherin-23 OS=Homo sapiens GN=DCHS2 PE=2 SV=1;sp|Q6V1P9|PCD23_HUMAN Protocadherin-23 OS=Homo sapiens GN=DCHS2 PE=2 SV=1;sp|E9PVD3|PCD16_MOUSE Protocadherin-16 OS=Mus musculus GN=Dchs1 PE=1 SV=1
DCK	1.31534	1.31513	1.19838	1.27161	1.18327	1.23603	1.12352	1.33925	1.22167	1.2783	1.2235	1.32366	0.683047	0.710963	0.773055	0.664642	0.739572	0.765669	PREDICTED: deoxycytidine kinase isoform X1 [Chrysemys picta bellii];PREDICTED: deoxycytidine kinase [Pelodiscus sinensis]	-	-	K00893	DCK	http://www.genome.jp/dbget-bin/www_bget?ko:K00893	Purine metabolism;Pyrimidine metabolism	ko00230,ko00240	-	sp|Q3MHR2|DCK_BOVIN;gnl|BL_ORD_ID|354727;sp|P43346|DCK_MOUSE	sp|Q3MHR2|DCK_BOVIN Deoxycytidine kinase OS=Bos taurus GN=DCK PE=2 SV=1;sp|P43346|DCK_MOUSE Deoxycytidine kinase OS=Mus musculus GN=Dck PE=1 SV=1;sp|P43346|DCK_MOUSE Deoxycytidine kinase OS=Mus musculus GN=Dck PE=1 SV=1
DCLK2	0.728354	0.584331	0.731589	0.687529	0.532754	0.61595	0.392697	0.447158	0.549003	0.518514	0.344392	0.531479	0.161368	0.127105	0.176091	0.193125	0.255273	0.348305	PREDICTED: serine/threonine-protein kinase DCLK2 isoform X5 [Pelodiscus sinensis];PREDICTED: serine/threonine-protein kinase DCLK2 isoform X3 [Pelodiscus sinensis];PREDICTED: serine/threonine-protein kinase DCLK2 isoform X1 [Pelodiscus sinensis];PREDICTED: serine/threonine-protein kinase DCLK2 isoform X1 [Chrysemys picta bellii];PREDICTED: serine/threonine-protein kinase DCLK2 isoform X4 [Pelodis…	-	-	K08805	DCLK1_2	http://www.genome.jp/dbget-bin/www_bget?ko:K08805	-	-	KOG3757(DZ)(Microtubule assembly protein Doublecortin and related proteins, contain DCX domain);KOG0033(T)(Ca2+/calmodulin-dependent protein kinase, EF-Hand protein superfamily);KOG0032(T)(Ca2+/calmodulin-dependent protein kinase, EF-Hand protein superfamily)	sp|Q6PGN3|DCLK2_MOUSE;sp|Q8N568|DCLK2_HUMAN;gnl|BL_ORD_ID|350134;sp|Q5MPA9|DCLK2_RAT;sp|D2I3C6|DCLK2_AILME;gnl|BL_ORD_ID|354141	sp|Q6PGN3|DCLK2_MOUSE Serine/threonine-protein kinase DCLK2 OS=Mus musculus GN=Dclk2 PE=1 SV=1;sp|Q8N568|DCLK2_HUMAN Serine/threonine-protein kinase DCLK2 OS=Homo sapiens GN=DCLK2 PE=1 SV=4;sp|D2I3C6|DCLK2_AILME Serine/threonine-protein kinase DCLK2 OS=Ailuropoda melanoleuca GN=DCLK2 PE=3 SV=1;sp|Q5MPA9|DCLK2_RAT Serine/threonine-protein kinase DCLK2 OS=Rattus norvegicus GN=Dclk2 PE=1 SV=2;sp|D2I…
DCLK3	0.4843	0.450249	0.440909	0.453318	0.374748	0.480007	0.454845	0.357935	0.437751	0.429752	0.428135	0.454845	0.130334	0.0681859	0.0293838	0.161368	0.255273	0.075547	PREDICTED: serine/threonine-protein kinase DCLK3 [Pelodiscus sinensis]	-	-	K17530	DCLK3	http://www.genome.jp/dbget-bin/www_bget?ko:K17530	-	-	KOG0033(T)(Ca2+/calmodulin-dependent protein kinase, EF-Hand protein superfamily)	gnl|BL_ORD_ID|354736;sp|Q8BWQ5|DCLK3_MOUSE	sp|Q8BWQ5|DCLK3_MOUSE Serine/threonine-protein kinase DCLK3 OS=Mus musculus GN=Dclk3 PE=2 SV=2;sp|Q8BWQ5|DCLK3_MOUSE Serine/threonine-protein kinase DCLK3 OS=Mus musculus GN=Dclk3 PE=2 SV=2
DCLRE1B	0.874482	0.836957	0.951338	1.19173	0.957607	1.06183	0.596597	0.803457	0.824126	0.726727	0.869818	0.950851	0.542825	0.352183	0.39794	0.482874	0.572872	0.605305	PREDICTED: 5' exonuclease Apollo [Pelodiscus sinensis]	GO:0031848;GO:0090305;GO:0008409;GO:0031627;GO:0000723;GO:0000781;GO:0031860;GO:0000075;GO:0004527;GO:0000784;GO:0005813	protection from non-homologous end joining at telomere;nucleic acid phosphodiester bond hydrolysis;5'-3' exonuclease activity;telomeric loop formation;telomere maintenance;chromosome, telomeric region;telomeric 3' overhang formation;cell cycle checkpoint;exonuclease activity;nuclear chromosome, telomeric region;centrosome	K15341	DCLRE1B,SNM1B	http://www.genome.jp/dbget-bin/www_bget?ko:K15341	-	-	KOG1361(L)(Predicted hydrolase involved in interstrand cross-link repair)	sp|Q5QJC3|DCR1B_CHICK;gnl|BL_ORD_ID|350156	sp|Q5QJC3|DCR1B_CHICK 5' exonuclease Apollo OS=Gallus gallus GN=DCLRE1B PE=2 SV=1;sp|Q5QJC3|DCR1B_CHICK 5' exonuclease Apollo OS=Gallus gallus GN=DCLRE1B PE=2 SV=1
DCX	0.0334238	0.00860017	0.0211893	0.0530784	0.0374265	0.00860017	0.217484	0.225309	0.117271	0.201397	0.1959	0.584331	0	0.00860017	0.00432137	0	0.0211893	0.0293838	PREDICTED: neuronal migration protein doublecortin isoform X1 [Equus caballus]<>XP_014709258.1 PREDICTED: neuronal migration protein doublecortin isoform X1 [Equus asinus]<>XP_014709263.1 PREDICTED: neuronal migration protein doublecortin isoform X1 [Equus asinus]<>XP_014709270.1 PREDICTED: neuronal migration protein doublecortin isoform X1 [Equus asinus];PREDICTED: neuronal migration protein dou…	GO:0030425;GO:0021766;GO:0007420;GO:0005737;GO:0043005;GO:0018105;GO:0007399;GO:0042995;GO:0005516;GO:0007417;GO:0019901;GO:0004683;GO:0005856;GO:0008017;GO:0007275;GO:0051602;GO:0005829;GO:0046777;GO:0001764;GO:0048675;GO:0005875;GO:0021860;GO:0048813;GO:0005874;GO:0005515;GO:0035556;GO:0021819;GO:0005634;GO:0021952;GO:0009931	dendrite;hippocampus development;brain development;cytoplasm;neuron projection;peptidyl-serine phosphorylation;nervous system development;cell projection;calmodulin binding;central nervous system development;protein kinase binding;calmodulin-dependent protein kinase activity;cytoskeleton;microtubule binding;multicellular organism development;response to electrical stimulus;cytosol;protein autopho…	K16579	DCX	http://www.genome.jp/dbget-bin/www_bget?ko:K16579	-	-	KOG3757(DZ)(Microtubule assembly protein Doublecortin and related proteins, contain DCX domain)	sp|O43602|DCX_HUMAN;gnl|BL_ORD_ID|356661;gnl|BL_ORD_ID|354860	sp|O43602|DCX_HUMAN Neuronal migration protein doublecortin OS=Homo sapiens GN=DCX PE=1 SV=4;sp|O88809|DCX_MOUSE Neuronal migration protein doublecortin OS=Mus musculus GN=Dcx PE=1 SV=1;sp|O43602|DCX_HUMAN Neuronal migration protein doublecortin OS=Homo sapiens GN=DCX PE=1 SV=4
DDC	0.320146	0.120574	0.521138	0.281033	0.307496	0.0827854	0.466868	0.424882	0.511883	0.432969	0.369216	0.432969	0.369216	0.477121	0.71265	0.227887	0.432969	0.305351	PREDICTED: aromatic-L-amino-acid decarboxylase [Pelodiscus sinensis]	GO:0005737;GO:0070062;GO:0003824;GO:0016831;GO:0030170;GO:0016829;GO:0036468;GO:0006520;GO:0009636;GO:0004058;GO:0019752;GO:0019899	cytoplasm;extracellular exosome;catalytic activity;carboxy-lyase activity;pyridoxal phosphate binding;lyase activity;L-dopa decarboxylase activity;cellular amino acid metabolic process;response to toxic substance;aromatic-L-amino-acid decarboxylase activity;carboxylic acid metabolic process;enzyme binding	K01593	DDC	http://www.genome.jp/dbget-bin/www_bget?ko:K01593	Histidine metabolism;Phenylalanine metabolism;Tryptophan metabolism;Tyrosine metabolism;Betalain biosynthesis;Indole alkaloid biosynthesis;Isoquinoline alkaloid biosynthesis;Dopaminergic synapse;Serotonergic synapse	ko00340,ko00360,ko00380,ko00350,ko00965,ko00901,ko00950,ko04728,ko04726	KOG0629(E)(Glutamate decarboxylase and related proteins)	sp|O88533|DDC_MOUSE;gnl|BL_ORD_ID|356668;sp|P20711|DDC_HUMAN	sp|O88533|DDC_MOUSE Aromatic-L-amino-acid decarboxylase OS=Mus musculus GN=Ddc PE=1 SV=1;sp|P20711|DDC_HUMAN Aromatic-L-amino-acid decarboxylase OS=Homo sapiens GN=DDC PE=1 SV=2;sp|P20711|DDC_HUMAN Aromatic-L-amino-acid decarboxylase OS=Homo sapiens GN=DDC PE=1 SV=2
DDIT3	0.474216	0.340444	0.283301	0.60206	0.619093	0.594393	0.201397	0.206826	0.318063	0.257679	0.201397	0.338456	0.469822	0.468347	0.338456	0.382017	0.363612	0.4843	PREDICTED: DNA damage-inducible transcript 3 protein [Pelodiscus sinensis]	GO:0008140;GO:0043433;GO:0034976;GO:0001077;GO:0005737;GO:0045454;GO:0090090;GO:0043065;GO:0005515;GO:0051898;GO:0030968;GO:0003700;GO:0045892;GO:0032792;GO:0000978;GO:2000016;GO:1990622;GO:0032757;GO:1901216;GO:0045599;GO:0006915;GO:0045662;GO:0043392;GO:0070059;GO:0045944;GO:0016055;GO:0032993;GO:0051209;GO:0006983;GO:0003677;GO:0006986;GO:0003714;GO:0005770;GO:0006355;GO:0046982;GO:0000976;GO:…	cAMP response element binding protein binding;negative regulation of sequence-specific DNA binding transcription factor activity;response to endoplasmic reticulum stress;transcriptional activator activity, RNA polymerase II core promoter proximal region sequence-specific binding;cytoplasm;cell redox homeostasis;negative regulation of canonical Wnt signaling pathway;positive regulation of apoptoti…	K04452	DDIT3,GADD153	http://www.genome.jp/dbget-bin/www_bget?ko:K04452	Apoptosis;MAPK signaling pathway;Protein processing in endoplasmic reticulum	ko04210,ko04010,ko04141	-	gnl|BL_ORD_ID|354183;sp|P35638|DDIT3_HUMAN	sp|P35638|DDIT3_HUMAN DNA damage-inducible transcript 3 protein OS=Homo sapiens GN=DDIT3 PE=1 SV=1;sp|P35638|DDIT3_HUMAN DNA damage-inducible transcript 3 protein OS=Homo sapiens GN=DDIT3 PE=1 SV=1
DDIT4L	0.989005	0.792392	0.812913	0.595496	0.802774	0.705864	1.19866	1.03743	1.02653	0.902003	0.715167	0.979548	0.669317	0.835691	0.954243	0.689309	0.9154	0.820201	PREDICTED: DNA damage-inducible transcript 4-like protein isoform X1 [Pelodiscus sinensis]	GO:0005737;GO:0009968	cytoplasm;negative regulation of signal transduction	-	-	-	-	-	-	gnl|BL_ORD_ID|353516;sp|A2VDT9|DDT4L_BOVIN	sp|A2VDT9|DDT4L_BOVIN DNA damage-inducible transcript 4-like protein OS=Bos taurus GN=DDIT4L PE=2 SV=1;sp|A2VDT9|DDT4L_BOVIN DNA damage-inducible transcript 4-like protein OS=Bos taurus GN=DDIT4L PE=2 SV=1
DDX24	1.17955	1.21458	1.19507	0.961421	0.909556	0.828015	0.975891	1.01995	0.961421	1.06595	0.932981	1.05038	0.779596	0.762679	0.614897	0.679428	0.702431	0.69897	PREDICTED: ATP-dependent RNA helicase DDX24 [Pelodiscus sinensis]	GO:0005524;GO:0005730;GO:0044822;GO:0004386;GO:0016020;GO:0003676;GO:0016787	ATP binding;nucleolus;RNA binding;helicase activity;membrane;nucleic acid binding;hydrolase activity	K14805	DDX24,MAK5	http://www.genome.jp/dbget-bin/www_bget?ko:K14805	-	-	KOG0338(A)(ATP-dependent RNA helicase);KOG0335(A)(ATP-dependent RNA helicase)	gnl|BL_ORD_ID|356772;sp|Q9GZR7|DDX24_HUMAN;sp|Q5RDL2|DDX24_PONAB	sp|Q9GZR7|DDX24_HUMAN ATP-dependent RNA helicase DDX24 OS=Homo sapiens GN=DDX24 PE=1 SV=1;sp|Q9GZR7|DDX24_HUMAN ATP-dependent RNA helicase DDX24 OS=Homo sapiens GN=DDX24 PE=1 SV=1;sp|Q5RDL2|DDX24_PONAB ATP-dependent RNA helicase DDX24 OS=Pongo abelii GN=DDX24 PE=2 SV=1
DDX4	0.071882	0.0827854	0.11059	0.285557	0.849419	0.230449	0.334454	0.322219	0.576341	0.556303	0.744293	0.450249	0.064458	0.117271	0.103804	0.230449	0.346353	0.133539	PREDICTED: probable ATP-dependent RNA helicase DDX4 [Pelodiscus sinensis]	GO:0005737;GO:0007140;GO:0071547;GO:0005524;GO:0034587;GO:0031047;GO:0071546;GO:0048471;GO:0007275;GO:0010501;GO:0004386;GO:0007283;GO:0043046;GO:0000166;GO:0003676;GO:0033391;GO:0016787;GO:0043186;GO:0030317;GO:0030154;GO:0004004	cytoplasm;male meiotic nuclear division;piP-body;ATP binding;piRNA metabolic process;gene silencing by RNA;pi-body;perinuclear region of cytoplasm;multicellular organism development;RNA secondary structure unwinding;helicase activity;spermatogenesis;DNA methylation involved in gamete generation;nucleotide binding;nucleic acid binding;chromatoid body;hydrolase activity;P granule;flagellated sperm …	K13982	DDX4,VASA	http://www.genome.jp/dbget-bin/www_bget?ko:K13982	-	-	KOG0331(A)(ATP-dependent RNA helicase)	gnl|BL_ORD_ID|354255;sp|Q5W5U4|DDX4_BOVIN;sp|Q61496|DDX4_MOUSE	sp|Q61496|DDX4_MOUSE Probable ATP-dependent RNA helicase DDX4 OS=Mus musculus GN=Ddx4 PE=1 SV=2;sp|Q5W5U4|DDX4_BOVIN Probable ATP-dependent RNA helicase DDX4 OS=Bos taurus GN=DDX4 PE=2 SV=1;sp|Q61496|DDX4_MOUSE Probable ATP-dependent RNA helicase DDX4 OS=Mus musculus GN=Ddx4 PE=1 SV=2
DDX60	0.00432137	0	0.00432137	0.00432137	0	0.0211893	0.0128372	0.0413927	0.0128372	0.045323	0.0413927	0.0334238	0.0569049	0.0934217	0.173186	0.049218	0.0606978	0.045323	PREDICTED: probable ATP-dependent RNA helicase DDX60 [Pelodiscus sinensis]	GO:0003690;GO:0005737;GO:1900245;GO:0016787;GO:0003723;GO:0005524;GO:0004386;GO:0003725;GO:0003727;GO:0045111;GO:0051607;GO:0003676;GO:1900246;GO:0009615	double-stranded DNA binding;cytoplasm;positive regulation of MDA-5 signaling pathway;hydrolase activity;RNA binding;ATP binding;helicase activity;double-stranded RNA binding;single-stranded RNA binding;intermediate filament cytoskeleton;defense response to virus;nucleic acid binding;positive regulation of RIG-I signaling pathway;response to virus	K20103	DDX60	http://www.genome.jp/dbget-bin/www_bget?ko:K20103	-	-	KOG0949(R)(Predicted helicase, DEAD-box superfamily);KOG0948(A)(Nuclear exosomal RNA helicase MTR4, DEAD-box superfamily)	gnl|BL_ORD_ID|350830;sp|Q8IY21|DDX60_HUMAN	sp|Q8IY21|DDX60_HUMAN Probable ATP-dependent RNA helicase DDX60 OS=Homo sapiens GN=DDX60 PE=1 SV=3;sp|Q8IY21|DDX60_HUMAN Probable ATP-dependent RNA helicase DDX60 OS=Homo sapiens GN=DDX60 PE=1 SV=3
DENND1B	0.432969	0.38739	0.322219	0.0681859	0.30103	0.167317	0.662758	0.521138	0.534026	0.644439	0.4843	0.663701	0.243038	0.625312	0.445604	0.447158	0.429752	0.421604	PREDICTED: DENN domain-containing protein 1B [Pelodiscus sinensis]	-	-	K20160	DENND1	http://www.genome.jp/dbget-bin/www_bget?ko:K20160	-	-	-	gnl|BL_ORD_ID|355975;sp|Q3U1T9|DEN1B_MOUSE	sp|Q6P3S1|DEN1B_HUMAN DENN domain-containing protein 1B OS=Homo sapiens GN=DENND1B PE=1 SV=2;sp|Q3U1T9|DEN1B_MOUSE DENN domain-containing protein 1B OS=Mus musculus GN=Dennd1b PE=1 SV=3
DENND4A	0.269513	0.245513	0.245513	0.232996	0.25042	0.198657	0.5302	0.439333	0.416641	0.534026	0.49693	0.482874	0.155336	0.307496	0.181844	0.201397	0.230449	0.287802	PREDICTED: C-myc promoter-binding protein [Pelodiscus sinensis]	GO:0043547;GO:0017112	positive regulation of GTPase activity;Rab guanyl-nucleotide exchange factor activity	K20163	DENND4	http://www.genome.jp/dbget-bin/www_bget?ko:K20163	-	-	KOG1090(R)(Predicted dual-specificity phosphatase)	gnl|BL_ORD_ID|413566;sp|Q7Z401|MYCPP_HUMAN	sp|Q7Z401|MYCPP_HUMAN C-myc promoter-binding protein OS=Homo sapiens GN=DENND4A PE=1 SV=2;sp|Q7Z401|MYCPP_HUMAN C-myc promoter-binding protein OS=Homo sapiens GN=DENND4A PE=1 SV=2
DEPDC1	0.598791	0.63749	0.593286	0.515874	0.511883	0.561101	0.453318	0.58995	0.521138	0.577492	0.494155	0.556303	0.20412	0.152288	0.146128	0.220108	0.190332	0.227887	PREDICTED: DEP domain-containing protein 1A isoform X3 [Pelodiscus sinensis];PREDICTED: DEP domain-containing protein 1A isoform X1 [Pelodiscus sinensis]<>XP_006123415.1 PREDICTED: DEP domain-containing protein 1A isoform X2 [Pelodiscus sinensis]	-	-	-	-	-	-	-	-	sp|Q4R623|DEP1B_MACFA;gnl|BL_ORD_ID|350343;gnl|BL_ORD_ID|356058	sp|Q4R623|DEP1B_MACFA DEP domain-containing protein 1B OS=Macaca fascicularis GN=DEPDC1B PE=2 SV=1;sp|Q4R623|DEP1B_MACFA DEP domain-containing protein 1B OS=Macaca fascicularis GN=DEPDC1B PE=2 SV=1;sp|Q5TB30|DEP1A_HUMAN DEP domain-containing protein 1A OS=Homo sapiens GN=DEPDC1 PE=1 SV=2
DEPTOR	0.70927	0.848805	0.751279	0.488551	0.445604	0.624282	0.710963	0.751279	0.658011	0.748188	0.699838	0.652246	0.935003	0.898725	0.806858	0.853698	0.992111	0.935003	PREDICTED: DEP domain-containing mTOR-interacting protein isoform X1 [Pelodiscus sinensis]<>XP_014436299.1 PREDICTED: DEP domain-containing mTOR-interacting protein isoform X1 [Pelodiscus sinensis];PREDICTED: DEP domain-containing mTOR-interacting protein isoform X2 [Pelodiscus sinensis]	GO:0005622;GO:0045792;GO:0032007;GO:2001236;GO:0006469;GO:0035556	intracellular;negative regulation of cell size;negative regulation of TOR signaling;regulation of extrinsic apoptotic signaling pathway;negative regulation of protein kinase activity;intracellular signal transduction	K20402	DEPTOR	http://www.genome.jp/dbget-bin/www_bget?ko:K20402	Autophagy - animal;mTOR signaling pathway	ko04140,ko04150	-	gnl|BL_ORD_ID|371937;sp|Q8TB45|DPTOR_HUMAN	sp|Q8TB45|DPTOR_HUMAN DEP domain-containing mTOR-interacting protein OS=Homo sapiens GN=DEPTOR PE=1 SV=2;sp|Q8TB45|DPTOR_HUMAN DEP domain-containing mTOR-interacting protein OS=Homo sapiens GN=DEPTOR PE=1 SV=2
DERA	0.846337	0.643453	0.705864	0.650308	0.744293	0.742725	1.00303	0.85309	0.841985	0.827369	0.788875	0.770852	0.7348	1.01284	0.958086	0.869818	0.725912	0.902547	PREDICTED: deoxyribose-phosphate aldolase [Pelodiscus sinensis]	GO:0005737;GO:0004139;GO:0070062;GO:0003824;GO:0016829;GO:0046121;GO:0009264	cytoplasm;deoxyribose-phosphate aldolase activity;extracellular exosome;catalytic activity;lyase activity;deoxyribonucleoside catabolic process;deoxyribonucleotide catabolic process	K01619	deoC,DERA	http://www.genome.jp/dbget-bin/www_bget?ko:K01619	Pentose phosphate pathway	ko00030	-	gnl|BL_ORD_ID|356956;sp|Q9Y315|DEOC_HUMAN	sp|Q9Y315|DEOC_HUMAN Deoxyribose-phosphate aldolase OS=Homo sapiens GN=DERA PE=1 SV=2;sp|Q9Y315|DEOC_HUMAN Deoxyribose-phosphate aldolase OS=Homo sapiens GN=DERA PE=1 SV=2
DESI1	1.07408	1.02735	0.938019	0.877947	0.961895	0.889302	1.11561	1.07041	1.09691	0.998259	1.05843	1.03019	0.943989	1.0693	1.03902	0.858537	0.961895	0.975432	PREDICTED: desumoylating isopeptidase 1 [Chrysemys picta bellii];PREDICTED: desumoylating isopeptidase 1 [Pelodiscus sinensis]	GO:0042802	identical protein binding	-	-	-	-	-	KOG0324(S)(Uncharacterized conserved protein)	sp|Q4KM30|DESI1_RAT;gnl|BL_ORD_ID|358717;sp|Q6ICB0|DESI1_HUMAN	sp|Q4KM30|DESI1_RAT Desumoylating isopeptidase 1 OS=Rattus norvegicus GN=Desi1 PE=2 SV=1;sp|Q6ICB0|DESI1_HUMAN Desumoylating isopeptidase 1 OS=Homo sapiens GN=DESI1 PE=1 SV=1;sp|Q6ICB0|DESI1_HUMAN Desumoylating isopeptidase 1 OS=Homo sapiens GN=DESI1 PE=1 SV=1
DGKH	0.0530784	0.127105	0.075547	0.143015	0.123852	0.0899051	0.298853	0.187521	0.225309	0.25042	0.264818	0.283301	0	0.0530784	0.049218	0.0791812	0.0934217	0.127105	PREDICTED: diacylglycerol kinase eta isoform X2 [Pelodiscus sinensis];PREDICTED: diacylglycerol kinase eta isoform X1 [Pelodiscus sinensis];PREDICTED: diacylglycerol kinase eta isoform X4 [Anser cygnoides domesticus];PREDICTED: diacylglycerol kinase eta isoform X3 [Pelodiscus sinensis]	-	-	K00901	dgkA,DGK	http://www.genome.jp/dbget-bin/www_bget?ko:K00901	Phosphatidylinositol signaling system;Phospholipase D signaling pathway;Glycerolipid metabolism;Glycerophospholipid metabolism	ko04070,ko04072,ko00561,ko00564	KOG1170(I)(Diacylglycerol kinase)	sp|Q86XP1|DGKH_HUMAN;gnl|BL_ORD_ID|357651	sp|Q86XP1|DGKH_HUMAN Diacylglycerol kinase eta OS=Homo sapiens GN=DGKH PE=1 SV=1;sp|Q86XP1|DGKH_HUMAN Diacylglycerol kinase eta OS=Homo sapiens GN=DGKH PE=1 SV=1
DGKQ	0.120574	0.146128	0.071882	0.187521	0.164353	0.136721	0.434569	0.369216	0.365488	0.559907	0.4843	0.472756	0.155336	0.155336	0.267172	0.09691	0.136721	0.305351	PREDICTED: diacylglycerol kinase theta isoform X1 [Pelodiscus sinensis]	-	-	K00901	dgkA,DGK	http://www.genome.jp/dbget-bin/www_bget?ko:K00901	Phosphatidylinositol signaling system;Phospholipase D signaling pathway;Glycerolipid metabolism;Glycerophospholipid metabolism	ko04070,ko04072,ko00561,ko00564	KOG1169(IT)(Diacylglycerol kinase)	sp|Q6P5E8|DGKQ_MOUSE;gnl|BL_ORD_ID|357652	sp|Q6P5E8|DGKQ_MOUSE Diacylglycerol kinase theta OS=Mus musculus GN=Dgkq PE=1 SV=1;sp|Q6P5E8|DGKQ_MOUSE Diacylglycerol kinase theta OS=Mus musculus GN=Dgkq PE=1 SV=1
DHRS13	0.854913	0.808886	0.886491	0.701568	0.929419	0.833147	0.932474	0.921166	1.02202	0.92737	0.956168	0.95376	0.96708	1.07555	1.01199	0.961421	0.942008	0.986772	PREDICTED: dehydrogenase/reductase SDR family member 13 [Pelodiscus sinensis]	GO:0016021;GO:0016020	integral component of membrane;membrane	K11169	DHRS13	http://www.genome.jp/dbget-bin/www_bget?ko:K11169	-	-	KOG1208(Q)(Dehydrogenases with different specificities (related to short-chain alcohol dehydrogenases))	gnl|BL_ORD_ID|362045;sp|Q17QU7|DHR13_BOVIN	sp|Q17QU7|DHR13_BOVIN Dehydrogenase/reductase SDR family member 13 OS=Bos taurus GN=DHRS13 PE=2 SV=1;sp|Q17QU7|DHR13_BOVIN Dehydrogenase/reductase SDR family member 13 OS=Bos taurus GN=DHRS13 PE=2 SV=1
DHX30	1.00087	0.91803	0.964731	1.36698	1.36624	1.26293	1.16879	1.14706	1.17114	1.17464	1.12156	1.24748	0.870989	0.829947	0.726727	0.928908	0.808886	0.868056	PREDICTED: LOW QUALITY PROTEIN: putative ATP-dependent RNA helicase DHX30 [Pelodiscus sinensis]	-	-	K13185	DHX30	http://www.genome.jp/dbget-bin/www_bget?ko:K13185	-	-	KOG0923(A)(mRNA splicing factor ATP-dependent RNA helicase)	sp|Q5ZI74|DHX30_CHICK;gnl|BL_ORD_ID|351304	sp|Q5ZI74|DHX30_CHICK Putative ATP-dependent RNA helicase DHX30 OS=Gallus gallus GN=DHX30 PE=2 SV=1;sp|Q5ZI74|DHX30_CHICK Putative ATP-dependent RNA helicase DHX30 OS=Gallus gallus GN=DHX30 PE=2 SV=1
DHX37	0.795185	0.762679	0.38739	0.440909	0.474216	0.392697	0.818885	0.835691	0.713491	0.752816	0.523746	0.657056	0.491362	0.658011	0.389166	0.209515	0.322219	0.350248	PREDICTED: probable ATP-dependent RNA helicase DHX37 [Pelodiscus sinensis];PREDICTED: probable ATP-dependent RNA helicase DHX37 [Chrysemys picta bellii]	GO:0005737;GO:0006396;GO:0005524;GO:0005730;GO:0044822;GO:0004386;GO:0000166;GO:0003676;GO:0016787;GO:0004004	cytoplasm;RNA processing;ATP binding;nucleolus;RNA binding;helicase activity;nucleotide binding;nucleic acid binding;hydrolase activity;ATP-dependent RNA helicase activity	K14780	DHX37,DHR1	http://www.genome.jp/dbget-bin/www_bget?ko:K14780	-	-	KOG0926(AJ)(DEAH-box RNA helicase);KOG0924(A)(mRNA splicing factor ATP-dependent RNA helicase)	gnl|BL_ORD_ID|360269;sp|Q8IY37|DHX37_HUMAN	sp|Q8IY37|DHX37_HUMAN Probable ATP-dependent RNA helicase DHX37 OS=Homo sapiens GN=DHX37 PE=1 SV=1;sp|Q8IY37|DHX37_HUMAN Probable ATP-dependent RNA helicase DHX37 OS=Homo sapiens GN=DHX37 PE=1 SV=1
DHX40	0.945961	1.19479	1.19507	1.23147	1.03623	1.31869	0.904174	0.880242	0.956649	0.868644	0.866287	0.937518	0.892095	0.860338	0.897077	1.1284	1.09061	0.876218	PREDICTED: probable ATP-dependent RNA helicase DHX40 isoform X3 [Pelodiscus sinensis];PREDICTED: probable ATP-dependent RNA helicase DHX40 isoform X2 [Pelodiscus sinensis];PREDICTED: probable ATP-dependent RNA helicase DHX40 isoform X1 [Pelodiscus sinensis];PREDICTED: probable ATP-dependent RNA helicase DHX40 isoform X4 [Pelodiscus sinensis]	GO:0005737;GO:0006396;GO:0005524;GO:0005730;GO:0044822;GO:0004386;GO:0008026;GO:0000166;GO:0003676;GO:0016787;GO:0004004	cytoplasm;RNA processing;ATP binding;nucleolus;RNA binding;helicase activity;ATP-dependent helicase activity;nucleotide binding;nucleic acid binding;hydrolase activity;ATP-dependent RNA helicase activity	K18711	DHX40,DDX40	http://www.genome.jp/dbget-bin/www_bget?ko:K18711	-	-	KOG0925(A)(mRNA splicing factor ATP-dependent RNA helicase)	gnl|BL_ORD_ID|360270;sp|Q5R864|DHX40_PONAB;gnl|BL_ORD_ID|356355	sp|Q8IX18|DHX40_HUMAN Probable ATP-dependent RNA helicase DHX40 OS=Homo sapiens GN=DHX40 PE=1 SV=2;sp|Q5R864|DHX40_PONAB Probable ATP-dependent RNA helicase DHX40 OS=Pongo abelii GN=DHX40 PE=2 SV=1;sp|Q5R864|DHX40_PONAB Probable ATP-dependent RNA helicase DHX40 OS=Pongo abelii GN=DHX40 PE=2 SV=1
DHX58	0.235528	0.161368	0.436163	0.385606	0.465383	0.426511	0.49276	0.371068	0.444045	0.465383	0.296665	0.357935	0.653213	0.569374	0.617	0.502427	0.404834	0.608526	PREDICTED: probable ATP-dependent RNA helicase DHX58 [Pelodiscus sinensis]	-	-	K12649	DHX58,LGP2	http://www.genome.jp/dbget-bin/www_bget?ko:K12649	RIG-I-like receptor signaling pathway	ko04622	KOG0354(R)(DEAD-box like helicase)	sp|Q96C10|DHX58_HUMAN;gnl|BL_ORD_ID|362067;sp|Q99J87|DHX58_MOUSE	sp|Q96C10|DHX58_HUMAN Probable ATP-dependent RNA helicase DHX58 OS=Homo sapiens GN=DHX58 PE=1 SV=1;sp|Q99J87|DHX58_MOUSE Probable ATP-dependent RNA helicase DHX58 OS=Mus musculus GN=Dhx58 PE=1 SV=2;sp|Q99J87|DHX58_MOUSE Probable ATP-dependent RNA helicase DHX58 OS=Mus musculus GN=Dhx58 PE=1 SV=2
DIAPH2	0.522444	0.509203	0.457882	0.313867	0.376577	0.401401	0.726727	0.666518	0.559907	0.783189	0.668386	0.741939	0.40824	0.605305	0.515874	0.477121	0.429752	0.419956	PREDICTED: protein diaphanous homolog 2 [Chelonia mydas];PREDICTED: protein diaphanous homolog 2 isoform X8 [Chrysemys picta bellii];PREDICTED: protein diaphanous homolog 2 isoform X2 [Chrysemys picta bellii];PREDICTED: protein diaphanous homolog 2 isoform X4 [Chrysemys picta bellii]	-	-	K05741	DIAPH2	http://www.genome.jp/dbget-bin/www_bget?ko:K05741	Regulation of actin cytoskeleton	ko04810	KOG1924(TZ)(RhoA GTPase effector DIA/Diaphanous)	sp|O60879|DIAP2_HUMAN;gnl|BL_ORD_ID|356367	sp|O60879|DIAP2_HUMAN Protein diaphanous homolog 2 OS=Homo sapiens GN=DIAPH2 PE=1 SV=1;sp|O60879|DIAP2_HUMAN Protein diaphanous homolog 2 OS=Homo sapiens GN=DIAPH2 PE=1 SV=1
DIO3	0.487138	0.404834	0.568202	0.938019	1.01072	0.938019	0.698101	0.617	0.942008	0.941511	1.16909	0.808886	0.618048	0.278754	0.49276	0.728354	0.710963	0.693727	PREDICTED: thyroxine 5-deiodinase isoform X1 [Pelodiscus sinensis]<>XP_014427470.1 PREDICTED: thyroxine 5-deiodinase isoform X2 [Pelodiscus sinensis]	-	-	K07754	DIO3	http://www.genome.jp/dbget-bin/www_bget?ko:K07754	Thyroid hormone signaling pathway	ko04919	-	sp|O42412|IOD3_CHICK;gnl|BL_ORD_ID|58395	sp|O42412|IOD3_CHICK Thyroxine 5-deiodinase (Fragment) OS=Gallus gallus GN=DIO3 PE=2 SV=3;sp|O42412|IOD3_CHICK Thyroxine 5-deiodinase (Fragment) OS=Gallus gallus GN=DIO3 PE=2 SV=3
DKK1	0.850646	0.572872	0.786751	1.35064	1.13513	0.868056	1.0141	0.957128	0.79796	0.879096	0.889302	1.08243	0.103804	0.20412	0.143015	0.271842	0.264818	0.281033	PREDICTED: dickkopf-related protein 1 [Pelodiscus sinensis]	-	-	K02165	DKK	http://www.genome.jp/dbget-bin/www_bget?ko:K02165	Wnt signaling pathway	ko04310	-	sp|O94907|DKK1_HUMAN;gnl|BL_ORD_ID|361279	sp|O94907|DKK1_HUMAN Dickkopf-related protein 1 OS=Homo sapiens GN=DKK1 PE=1 SV=1;sp|O94907|DKK1_HUMAN Dickkopf-related protein 1 OS=Homo sapiens GN=DKK1 PE=1 SV=1
DKK2	0.09691	0.0374265	0.0569049	0.0791812	0.09691	0.0293838	0.209515	0.225309	0.133539	0.243038	0.193125	0.477121	0	0.0253059	0.0128372	0.00432137	0.0413927	0.0128372	PREDICTED: dickkopf-related protein 2 isoform X1 [Pelodiscus sinensis]	GO:0007275;GO:0030178;GO:0005576	multicellular organism development;negative regulation of Wnt signaling pathway;extracellular region	K02165	DKK	http://www.genome.jp/dbget-bin/www_bget?ko:K02165	Wnt signaling pathway	ko04310	-	sp|Q9UBU2|DKK2_HUMAN;gnl|BL_ORD_ID|359708	sp|Q9UBU2|DKK2_HUMAN Dickkopf-related protein 2 OS=Homo sapiens GN=DKK2 PE=2 SV=1;sp|Q9UBU2|DKK2_HUMAN Dickkopf-related protein 2 OS=Homo sapiens GN=DKK2 PE=2 SV=1
DLC1	0.844477	0.755112	0.790285	0.996074	0.93852	0.843855	1.05115	0.974972	0.949878	1.04961	1.20763	1.18441	0.389166	0.367356	0.436163	0.580925	0.489958	0.482874	PREDICTED: rho GTPase-activating protein 7 isoform X3 [Pelodiscus sinensis];PREDICTED: rho GTPase-activating protein 7 isoform X2 [Pelodiscus sinensis];PREDICTED: rho GTPase-activating protein 7 isoform X1 [Pelodiscus sinensis]<>XP_006113566.1 PREDICTED: rho GTPase-activating protein 7 isoform X1 [Pelodiscus sinensis]<>XP_006113567.1 PREDICTED: rho GTPase-activating protein 7 isoform X1 [Pelodisc…	GO:0007165;GO:0005096;GO:0008289;GO:0035023	signal transduction;GTPase activator activity;lipid binding;regulation of Rho protein signal transduction	-	-	-	-	-	KOG2200(T)(Tumour suppressor protein p122-RhoGAP/DLC1)	sp|B9VTT2|RHG07_CANLF;sp|A7E300|RHG07_BOVIN;gnl|BL_ORD_ID|444826;sp|Q96QB1|RHG07_HUMAN;gnl|BL_ORD_ID|161432;gnl|BL_ORD_ID|161433	sp|B9VTT2|RHG07_CANLF Rho GTPase-activating protein 7 OS=Canis lupus familiaris GN=DLC1 PE=2 SV=1;sp|A7E300|RHG07_BOVIN Rho GTPase-activating protein 7 OS=Bos taurus GN=DLC1 PE=2 SV=1;sp|A7E300|RHG07_BOVIN Rho GTPase-activating protein 7 OS=Bos taurus GN=DLC1 PE=2 SV=1;sp|Q96QB1|RHG07_HUMAN Rho GTPase-activating protein 7 OS=Homo sapiens GN=DLC1 PE=1 SV=4;sp|B9VTT2|RHG07_CANLF Rho GTPase-activati…
DLG4	0.79588	0.765669	0.733999	1.02449	0.960471	0.914872	0.689309	0.689309	0.659916	0.666518	0.715167	0.71265	0.465383	0.564666	0.440909	0.565848	0.597695	0.625312	PREDICTED: disks large homolog 4 [Pelodiscus sinensis]	GO:0016020;GO:0030425;GO:0046710;GO:0060076;GO:0019903;GO:0032281;GO:0005737;GO:2000310;GO:0060997;GO:0045161;GO:0043197;GO:0097120;GO:0032839;GO:0050806;GO:0007165;GO:0008021;GO:0014069;GO:0097060;GO:2000463;GO:0044306;GO:0045197;GO:0015276;GO:0007399;GO:0097109;GO:0046037;GO:0030666;GO:0016188;GO:0031812;GO:0005886;GO:0008076;GO:0035254;GO:0000165;GO:0007612;GO:0005088;GO:0048169;GO:0002091;GO:…	membrane;dendrite;GDP metabolic process;excitatory synapse;protein phosphatase binding;AMPA glutamate receptor complex;cytoplasm;regulation of NMDA receptor activity;dendritic spine morphogenesis;neuronal ion channel clustering;dendritic spine;receptor localization to synapse;dendrite cytoplasm;positive regulation of synaptic transmission;signal transduction;synaptic vesicle;postsynaptic density …	K11828	DLG4,PSD95	http://www.genome.jp/dbget-bin/www_bget?ko:K11828	Hippo signaling pathway;Glutamatergic synapse	ko04390,ko04724	KOG0609(T)(Calcium/calmodulin-dependent serine protein kinase/membrane-associated guanylate kinase)	sp|P78352|DLG4_HUMAN;gnl|BL_ORD_ID|362838	sp|P78352|DLG4_HUMAN Disks large homolog 4 OS=Homo sapiens GN=DLG4 PE=1 SV=3;sp|P78352|DLG4_HUMAN Disks large homolog 4 OS=Homo sapiens GN=DLG4 PE=1 SV=3
DLX5	0.0569049	0.0530784	0.0827854	0.161368	0.139879	0.0293838	0.0791812	0.139879	0.164353	0.143015	0.123852	0.340444	0	0	0	0.33646	0.553883	0.468347	PREDICTED: homeobox protein DLX-5 [Chelonia mydas];PREDICTED: homeobox protein DLX-5 [Pelodiscus sinensis]	GO:0005737;GO:0030509;GO:0090263;GO:0003677;GO:0060166;GO:0060325;GO:0030855;GO:0001077;GO:0071837;GO:0048646;GO:0008283;GO:0060021;GO:0030326;GO:0042472;GO:0000978;GO:0000790;GO:0043565;GO:0044212;GO:0006355;GO:0005634	cytoplasm;BMP signaling pathway;positive regulation of canonical Wnt signaling pathway;DNA binding;olfactory pit development;face morphogenesis;epithelial cell differentiation;transcriptional activator activity, RNA polymerase II core promoter proximal region sequence-specific binding;HMG box domain binding;anatomical structure formation involved in morphogenesis;cell proliferation;palate develop…	K18489	DLX5	http://www.genome.jp/dbget-bin/www_bget?ko:K18489	Signaling pathways regulating pluripotency of stem cells	ko04550	KOG0491(R)(Transcription factor BSH, contains HOX domain)	gnl|BL_ORD_ID|360312;sp|P56178|DLX5_HUMAN	sp|P56178|DLX5_HUMAN Homeobox protein DLX-5 OS=Homo sapiens GN=DLX5 PE=1 SV=2;sp|P56178|DLX5_HUMAN Homeobox protein DLX-5 OS=Homo sapiens GN=DLX5 PE=1 SV=2
DMTN	1.03583	0.454845	0.426511	1.27784	1.2824	1.14891	1.03181	1.15715	0.974512	1.02078	1.09132	1.10243	0.491362	0.558709	0.499687	0.824776	0.624282	1.00647	PREDICTED: dematin isoform X2 [Pelodiscus sinensis];PREDICTED: dematin isoform X1 [Pelodiscus sinensis]<>XP_006135601.1 PREDICTED: dematin isoform X1 [Pelodiscus sinensis]<>XP_006135602.1 PREDICTED: dematin isoform X1 [Pelodiscus sinensis]<>XP_014435239.1 PREDICTED: dematin isoform X1 [Pelodiscus sinensis]	GO:1901731;GO:0030036;GO:0008360;GO:0090303;GO:0030194;GO:1900026;GO:0031095;GO:0048821;GO:0005886;GO:0030507;GO:0090315;GO:0005102;GO:0032956;GO:0048471;GO:0007010;GO:0005829;GO:0031253;GO:0016020;GO:0003779;GO:0014731;GO:0043621;GO:0030863;GO:0005884	positive regulation of platelet aggregation;actin cytoskeleton organization;regulation of cell shape;positive regulation of wound healing;positive regulation of blood coagulation;positive regulation of substrate adhesion-dependent cell spreading;platelet dense tubular network membrane;erythrocyte development;plasma membrane;spectrin binding;negative regulation of protein targeting to membrane;rec…	-	-	-	-	-	KOG0445(Z)(Actin regulatory protein supervillin (gelsolin/villin family))	sp|Q08DM1|DEMA_BOVIN;sp|Q5R4B6|DEMA_PONAB;gnl|BL_ORD_ID|355550;sp|Q08495|DEMA_HUMAN	sp|Q08DM1|DEMA_BOVIN Dematin OS=Bos taurus GN=DMTN PE=2 SV=1;sp|Q5R4B6|DEMA_PONAB Dematin OS=Pongo abelii GN=DMTN PE=2 SV=1;sp|Q5R4B6|DEMA_PONAB Dematin OS=Pongo abelii GN=DMTN PE=2 SV=1;sp|Q08495|DEMA_HUMAN Dematin OS=Homo sapiens GN=DMTN PE=1 SV=3
DNA2	0.999565	0.870404	0.877371	0.961895	0.7348	0.848189	0.647383	0.682145	0.771587	0.669317	0.683947	0.650308	0.290035	0.173186	0.214844	0.260071	0.531479	0.469822	PREDICTED: DNA replication ATP-dependent helicase/nuclease DNA2 [Eptesicus fuscus];PREDICTED: DNA replication ATP-dependent helicase/nuclease DNA2 [Pelodiscus sinensis]	GO:0008152;GO:0003824;GO:0003677;GO:0042645;GO:0005524;GO:0005739;GO:0000076;GO:0090305;GO:0043504;GO:0006260;GO:0045740;GO:0004386;GO:0043137;GO:0006974;GO:0033567;GO:0017108;GO:0051536;GO:1902990;GO:0000723;GO:0005623;GO:0000166;GO:0043142;GO:0004518;GO:0000729;GO:0000784;GO:0016787;GO:0005515;GO:0051539;GO:0006264;GO:0004519;GO:0006284;GO:0005634;GO:0006281;GO:0005760;GO:0043139;GO:0046872;GO:…	metabolic process;catalytic activity;DNA binding;mitochondrial nucleoid;ATP binding;mitochondrion;DNA replication checkpoint;nucleic acid phosphodiester bond hydrolysis;mitochondrial DNA repair;DNA replication;positive regulation of DNA replication;helicase activity;DNA replication, removal of RNA primer;cellular response to DNA damage stimulus;DNA replication, Okazaki fragment processing;5'-flap…	K10742	DNA2	http://www.genome.jp/dbget-bin/www_bget?ko:K10742	DNA replication	ko03030	KOG1805(L)(DNA replication helicase)	sp|Q5ZKG3|DNA2_CHICK;gnl|BL_ORD_ID|363635;sp|E1BMP7|DNA2_BOVIN	sp|Q5ZKG3|DNA2_CHICK DNA replication ATP-dependent helicase/nuclease DNA2 OS=Gallus gallus GN=DNA2 PE=2 SV=2;sp|Q5ZKG3|DNA2_CHICK DNA replication ATP-dependent helicase/nuclease DNA2 OS=Gallus gallus GN=DNA2 PE=2 SV=2;sp|E1BMP7|DNA2_BOVIN DNA replication ATP-dependent helicase/nuclease DNA2 OS=Bos taurus GN=DNA2 PE=3 SV=3
DNAH1	0.920645	0.736397	1.08279	1.19396	1.10687	1.1486	0.79588	0.632457	0.811575	0.738781	0.783904	0.751279	0.744293	0.614897	0.768638	0.868644	0.933993	0.724276	PREDICTED: dynein heavy chain 1, axonemal [Pelodiscus sinensis];PREDICTED: LOW QUALITY PROTEIN: dynein heavy chain 1, axonemal [Equus przewalskii]	-	-	K10408	DNAH	http://www.genome.jp/dbget-bin/www_bget?ko:K10408	-	-	KOG3595(Z)(Dyneins, heavy chain)	sp|Q9P2D7|DYH1_HUMAN;gnl|BL_ORD_ID|365937;sp|Q63164|DYH1_RAT	sp|Q9P2D7|DYH1_HUMAN Dynein heavy chain 1, axonemal OS=Homo sapiens GN=DNAH1 PE=2 SV=4;sp|Q9P2D7|DYH1_HUMAN Dynein heavy chain 1, axonemal OS=Homo sapiens GN=DNAH1 PE=2 SV=4;sp|Q63164|DYH1_RAT Dynein heavy chain 1, axonemal OS=Rattus norvegicus GN=Dnah1 PE=2 SV=2
DNAH10	0.921686	1.02572	0.826723	0.553883	0.40654	0.700704	0.587711	0.622214	0.623249	0.421604	0.356026	0.418301	0.537819	0.468347	0.58995	0.481443	0.546543	0.403121	PREDICTED: LOW QUALITY PROTEIN: dynein heavy chain 10, axonemal [Pelodiscus sinensis];PREDICTED: LOW QUALITY PROTEIN: dynein heavy chain 10, axonemal [Macaca nemestrina]	-	-	K10408	DNAH	http://www.genome.jp/dbget-bin/www_bget?ko:K10408	-	-	KOG3595(Z)(Dyneins, heavy chain)	sp|Q8IVF4|DYH10_HUMAN;gnl|BL_ORD_ID|365934	sp|Q8IVF4|DYH10_HUMAN Dynein heavy chain 10, axonemal OS=Homo sapiens GN=DNAH10 PE=1 SV=4;sp|Q8IVF4|DYH10_HUMAN Dynein heavy chain 10, axonemal OS=Homo sapiens GN=DNAH10 PE=1 SV=4
DNAH17	0.372912	0.365488	0.875061	0.952792	0.625312	0.943989	0.603144	0.11059	0.376577	0.30103	0.495544	0.564666	0.816241	0.198657	0.212188	0.447158	0.578639	0.812245	PREDICTED: LOW QUALITY PROTEIN: dynein heavy chain 17, axonemal [Pelodiscus sinensis]	-	-	K10408	DNAH	http://www.genome.jp/dbget-bin/www_bget?ko:K10408	-	-	KOG3595(Z)(Dyneins, heavy chain)	gnl|BL_ORD_ID|372195;sp|Q9UFH2|DYH17_HUMAN	sp|Q9UFH2|DYH17_HUMAN Dynein heavy chain 17, axonemal OS=Homo sapiens GN=DNAH17 PE=1 SV=2;sp|Q9UFH2|DYH17_HUMAN Dynein heavy chain 17, axonemal OS=Homo sapiens GN=DNAH17 PE=1 SV=2
DNAJC16	0.842609	0.942008	0.797268	0.729974	0.74351	0.781037	0.919601	0.904716	0.919078	0.904174	0.863917	0.867467	0.794488	0.899273	0.918555	0.784617	0.87564	0.93902	PREDICTED: dnaJ homolog subfamily C member 16 [Pelodiscus sinensis]	GO:0045454	cell redox homeostasis	K09536	DNAJC16	http://www.genome.jp/dbget-bin/www_bget?ko:K09536	-	-	KOG0714(O)(Molecular chaperone (DnaJ superfamily))	sp|Q5ZKZ4|DJC16_CHICK;gnl|BL_ORD_ID|356417	sp|Q5ZKZ4|DJC16_CHICK DnaJ homolog subfamily C member 16 OS=Gallus gallus GN=DNAJC16 PE=2 SV=1;sp|Q5ZKZ4|DJC16_CHICK DnaJ homolog subfamily C member 16 OS=Gallus gallus GN=DNAJC16 PE=2 SV=1
DNAJC24	0.770852	0.640481	0.563481	0.770852	0.754348	0.768638	0.540329	0.488551	0.519828	0.599883	0.491362	0.623249	0.575188	0.38739	0.462398	0.532754	0.444045	0.607455	PREDICTED: dnaJ homolog subfamily C member 24 isoform X1 [Pelodiscus sinensis]	-	-	K17867	DPH4,DNAJC24	http://www.genome.jp/dbget-bin/www_bget?ko:K17867	-	-	-	sp|Q0VBY7|DJC24_BOVIN;gnl|BL_ORD_ID|358231	sp|Q0VBY7|DJC24_BOVIN DnaJ homolog subfamily C member 24 OS=Bos taurus GN=DNAJC24 PE=2 SV=2;sp|Q0VBY7|DJC24_BOVIN DnaJ homolog subfamily C member 24 OS=Bos taurus GN=DNAJC24 PE=2 SV=2
DNAJC3	1.06595	1.04493	0.828015	0.881385	0.93044	1.01326	0.910624	0.953276	1.00604	1.08422	0.898176	0.959518	0.984527	1.19145	1.08422	0.978637	1.01703	1.12581	PREDICTED: dnaJ homolog subfamily C member 3 [Pelodiscus sinensis]	GO:0070417;GO:0036494;GO:0019901;GO:0006986;GO:0005829;GO:0006469;GO:0005783;GO:0004860;GO:1903912	cellular response to cold;positive regulation of translation initiation in response to endoplasmic reticulum stress;protein kinase binding;response to unfolded protein;cytosol;negative regulation of protein kinase activity;endoplasmic reticulum;protein kinase inhibitor activity;negative regulation of endoplasmic reticulum stress-induced eIF2 alpha phosphorylation	K09523	DNAJC3	http://www.genome.jp/dbget-bin/www_bget?ko:K09523	Protein processing in endoplasmic reticulum	ko04141	KOG0624(V)(dsRNA-activated protein kinase inhibitor P58, contains TPR and DnaJ domains);KOG0713(O)(Molecular chaperone (DnaJ superfamily))	gnl|BL_ORD_ID|362371;sp|Q5ZI13|DNJC3_CHICK	sp|Q5ZI13|DNJC3_CHICK DnaJ homolog subfamily C member 3 OS=Gallus gallus GN=DNAJC3 PE=2 SV=1;sp|Q5ZI13|DNJC3_CHICK DnaJ homolog subfamily C member 3 OS=Gallus gallus GN=DNAJC3 PE=2 SV=1
DND1	0	0	0	0.332438	0.947434	0.276462	0.0681859	0	0.49276	0.320146	0.617	0.499687	0	0	0.0569049	0.167317	0.549003	0.146128	PREDICTED: dead end protein homolog 1 [Pelodiscus sinensis]	-	-	-	-	-	-	-	-	gnl|BL_ORD_ID|363076	sp|Q8IYX4|DND1_HUMAN Dead end protein homolog 1 OS=Homo sapiens GN=DND1 PE=1 SV=1
DNER	0.945469	1.01703	0.98945	0.987666	0.748188	0.96426	1.12156	1.11059	1.0216	1.10721	1.12222	1.02857	1.2634	1.06296	1.05192	1.32243	1.10312	1.03181	PREDICTED: delta and Notch-like epidermal growth factor-related receptor [Pelodiscus sinensis];PREDICTED: delta and Notch-like epidermal growth factor-related receptor [Vicugna pacos]	GO:0030425;GO:0005769;GO:0030276;GO:0007220;GO:0007219;GO:0005886;GO:0007417;GO:0005509;GO:0004888;GO:0007416;GO:0016021;GO:0048741;GO:0043025;GO:0001764;GO:0005112;GO:0005515;GO:0006897;GO:0010001	dendrite;early endosome;clathrin binding;Notch receptor processing;Notch signaling pathway;plasma membrane;central nervous system development;calcium ion binding;transmembrane signaling receptor activity;synapse assembly;integral component of membrane;skeletal muscle fiber development;neuronal cell body;neuron migration;Notch binding;protein binding;endocytosis;glial cell differentiation	-	-	-	-	-	KOG1217(T)(Fibrillins and related proteins containing Ca2+-binding EGF-like domains)	sp|Q8NFT8|DNER_HUMAN;gnl|BL_ORD_ID|362359	sp|Q8NFT8|DNER_HUMAN Delta and Notch-like epidermal growth factor-related receptor OS=Homo sapiens GN=DNER PE=1 SV=1;sp|Q8NFT8|DNER_HUMAN Delta and Notch-like epidermal growth factor-related receptor OS=Homo sapiens GN=DNER PE=1 SV=1
DNM1	0.557507	0.305351	0.414973	0.89098	0.839478	0.49693	0.843855	0.755112	0.821514	0.780317	0.840106	0.966611	0.176091	0.247973	0.271842	0.252853	0.311754	0.274158	PREDICTED: dynamin-1 isoform X1 [Pelodiscus sinensis];PREDICTED: dynamin-1 isoform X4 [Pelodiscus sinensis];PREDICTED: dynamin-1 isoform X3 [Pelodiscus sinensis];PREDICTED: dynamin-1 isoform X2 [Pelodiscus sinensis];PREDICTED: dynamin-1 isoform X9 [Pelodiscus sinensis];PREDICTED: dynamin-1 isoform X6 [Pelodiscus sinensis];PREDICTED: dynamin-1 isoform X7 [Pelodiscus sinensis];PREDICTED: dynamin-1 …	GO:0070062;GO:0001917;GO:0042802;GO:0003924;GO:0030117;GO:0019901;GO:0046983;GO:0044822;GO:0006898;GO:0051932;GO:0007605;GO:1901998;GO:0043209;GO:0051262;GO:0000166;GO:0008344;GO:0072583;GO:0005525;GO:0006897;GO:0007032	extracellular exosome;photoreceptor inner segment;identical protein binding;GTPase activity;membrane coat;protein kinase binding;protein dimerization activity;RNA binding;receptor-mediated endocytosis;synaptic transmission, GABAergic;sensory perception of sound;toxin transport;myelin sheath;protein tetramerization;nucleotide binding;adult locomotory behavior;clathrin-dependent endocytosis;GTP bin…	K01528	DNM	http://www.genome.jp/dbget-bin/www_bget?ko:K01528	Endocytosis;Phospholipase D signaling pathway;Endocrine and other factor-regulated calcium reabsorption;Synaptic vesicle cycle	ko04144,ko04072,ko04961,ko04721	KOG0446(UR)(Vacuolar sorting protein VPS1, dynamin, and related proteins)	sp|Q08DF4|DYN1_BOVIN;sp|P39053|DYN1_MOUSE;sp|P21575|DYN1_RAT;gnl|BL_ORD_ID|372206;gnl|BL_ORD_ID|372207;gnl|BL_ORD_ID|364803	sp|Q08DF4|DYN1_BOVIN Dynamin-1 OS=Bos taurus GN=DNM1 PE=2 SV=1;sp|P39053|DYN1_MOUSE Dynamin-1 OS=Mus musculus GN=Dnm1 PE=1 SV=2;sp|P21575|DYN1_RAT Dynamin-1 OS=Rattus norvegicus GN=Dnm1 PE=1 SV=2;sp|Q08DF4|DYN1_BOVIN Dynamin-1 OS=Bos taurus GN=DNM1 PE=2 SV=1;sp|P39053|DYN1_MOUSE Dynamin-1 OS=Mus musculus GN=Dnm1 PE=1 SV=2;sp|P21575|DYN1_RAT Dynamin-1 OS=Rattus norvegicus GN=Dnm1 PE=1 SV=2
DNMBP	1.07846	0.995196	1.08386	1.28488	1.3075	1.36884	1.06032	1.01199	1.00346	1.04021	1.12057	1.07591	1.07262	0.904174	1.05652	1.26717	1.14706	1.19479	Dynamin-binding protein [Chelonia mydas];PREDICTED: LOW QUALITY PROTEIN: dynamin-binding protein, partial [Pelodiscus sinensis]	-	-	-	-	-	-	-	KOG4348(T)(Adaptor protein CMS/SETA);KOG4225(T)(Sorbin and SH3 domain-containing protein)	gnl|BL_ORD_ID|363212;sp|Q6XZF7|DNMBP_HUMAN	sp|Q6XZF7|DNMBP_HUMAN Dynamin-binding protein OS=Homo sapiens GN=DNMBP PE=1 SV=1;sp|Q6XZF7|DNMBP_HUMAN Dynamin-binding protein OS=Homo sapiens GN=DNMBP PE=1 SV=1
DOCK4	0.570543	0.49693	0.556303	0.759668	0.587711	0.574031	0.481443	0.620136	0.563481	0.537819	0.644439	0.636488	0.283301	0.240549	0.271842	0.350248	0.271842	0.371068	PREDICTED: dedicator of cytokinesis protein 4 isoform X2 [Pelodiscus sinensis];PREDICTED: dedicator of cytokinesis protein 4 isoform X1 [Pelodiscus sinensis];PREDICTED: dedicator of cytokinesis protein 4 isoform X3 [Pelodiscus sinensis];PREDICTED: dedicator of cytokinesis protein 4 isoform X4 [Pelodiscus sinensis]	GO:0005085;GO:0032421;GO:0007264;GO:0060326;GO:0043547;GO:1904694;GO:0005829;GO:0030165;GO:0014911;GO:0030971;GO:0016020;GO:0048365;GO:0032420;GO:0005096	guanyl-nucleotide exchange factor activity;stereocilium bundle;small GTPase mediated signal transduction;cell chemotaxis;positive regulation of GTPase activity;negative regulation of vascular smooth muscle contraction;cytosol;PDZ domain binding;positive regulation of smooth muscle cell migration;receptor tyrosine kinase binding;membrane;Rac GTPase binding;stereocilium;GTPase activator activity	K17697	DOCK4	http://www.genome.jp/dbget-bin/www_bget?ko:K17697	Rap1 signaling pathway	ko04015	KOG1998(T)(Signaling protein DOCK180)	sp|Q8N1I0|DOCK4_HUMAN;gnl|BL_ORD_ID|366573;sp|P59764|DOCK4_MOUSE;gnl|BL_ORD_ID|365691	sp|Q8N1I0|DOCK4_HUMAN Dedicator of cytokinesis protein 4 OS=Homo sapiens GN=DOCK4 PE=1 SV=3;sp|Q8N1I0|DOCK4_HUMAN Dedicator of cytokinesis protein 4 OS=Homo sapiens GN=DOCK4 PE=1 SV=3;sp|P59764|DOCK4_MOUSE Dedicator of cytokinesis protein 4 OS=Mus musculus GN=Dock4 PE=1 SV=1;sp|P59764|DOCK4_MOUSE Dedicator of cytokinesis protein 4 OS=Mus musculus GN=Dock4 PE=1 SV=1
DOCK5	0.718502	0.713491	0.770852	0.494155	0.677607	0.565848	0.843855	0.728354	0.814248	0.835691	0.761928	0.760422	0.586587	0.875061	0.761928	0.623249	0.605305	0.750508	PREDICTED: dedicator of cytokinesis protein 5 isoform X2 [Pelodiscus sinensis];PREDICTED: dedicator of cytokinesis protein 5 isoform X1 [Pelodiscus sinensis]	-	-	K17707	DOCK5	http://www.genome.jp/dbget-bin/www_bget?ko:K17707	-	-	KOG1998(T)(Signaling protein DOCK180)	gnl|BL_ORD_ID|363219;sp|Q9H7D0|DOCK5_HUMAN	sp|Q9H7D0|DOCK5_HUMAN Dedicator of cytokinesis protein 5 OS=Homo sapiens GN=DOCK5 PE=1 SV=3;sp|Q9H7D0|DOCK5_HUMAN Dedicator of cytokinesis protein 5 OS=Homo sapiens GN=DOCK5 PE=1 SV=3
DOCK8	0.298853	0.30963	0.324282	0.164353	0.201397	0.206826	0.290035	0.292256	0.201397	0.444045	0.502427	0.426511	0.255273	0.235528	0.152288	0.285557	0.33646	0.260071	PREDICTED: dedicator of cytokinesis protein 8 isoform X1 [Pelodiscus sinensis];PREDICTED: dedicator of cytokinesis protein 8 isoform X2 [Pelodiscus sinensis]	-	-	-	-	-	-	-	KOG1997(T)(PH domain-containing protein)	sp|Q8NF50|DOCK8_HUMAN;gnl|BL_ORD_ID|361757;sp|Q8C147|DOCK8_MOUSE	sp|Q8NF50|DOCK8_HUMAN Dedicator of cytokinesis protein 8 OS=Homo sapiens GN=DOCK8 PE=1 SV=3;sp|Q8NF50|DOCK8_HUMAN Dedicator of cytokinesis protein 8 OS=Homo sapiens GN=DOCK8 PE=1 SV=3;sp|Q8C147|DOCK8_MOUSE Dedicator of cytokinesis protein 8 OS=Mus musculus GN=Dock8 PE=1 SV=4
DOCK9	0.780317	0.869818	0.740363	0.720986	0.606381	0.742725	0.760422	0.696356	0.850646	0.857332	0.744293	0.833784	0.753583	0.859739	0.678518	0.865104	0.782473	0.710963	PREDICTED: dedicator of cytokinesis protein 9 isoform X4 [Pelodiscus sinensis];PREDICTED: dedicator of cytokinesis protein 9 isoform X2 [Pelodiscus sinensis];PREDICTED: dedicator of cytokinesis protein 9 isoform X1 [Pelodiscus sinensis];PREDICTED: dedicator of cytokinesis protein 9 isoform X3 [Pelodiscus sinensis]	-	-	-	-	-	-	-	KOG1997(T)(PH domain-containing protein)	sp|Q9BZ29|DOCK9_HUMAN;gnl|BL_ORD_ID|367266	sp|Q9BZ29|DOCK9_HUMAN Dedicator of cytokinesis protein 9 OS=Homo sapiens GN=DOCK9 PE=1 SV=2;sp|Q9BZ29|DOCK9_HUMAN Dedicator of cytokinesis protein 9 OS=Homo sapiens GN=DOCK9 PE=1 SV=2
DOK6	0.0899051	0.426511	0.075547	0.260071	0.262451	0.136721	0.311754	0.499687	0.303196	0.414973	0.240549	0.570543	0.644439	0.283301	0.671173	0.305351	0.426511	0.255273	PREDICTED: docking protein 6 isoform X4 [Pelodiscus sinensis];PREDICTED: docking protein 6 isoform X2 [Pelodiscus sinensis];PREDICTED: docking protein 6 isoform X3 [Pelodiscus sinensis];PREDICTED: docking protein 6 isoform X1 [Pelodiscus sinensis]	GO:0005158	insulin receptor binding	-	-	-	-	-	KOG4047(T)(Docking protein 1 (p62dok))	sp|Q2MHE5|DOK6_MOUSE;gnl|BL_ORD_ID|367962;sp|Q6PKX4|DOK6_HUMAN;gnl|BL_ORD_ID|367281	sp|Q2MHE5|DOK6_MOUSE Docking protein 6 OS=Mus musculus GN=Dok6 PE=2 SV=1;sp|Q6PKX4|DOK6_HUMAN Docking protein 6 OS=Homo sapiens GN=DOK6 PE=1 SV=1;sp|Q6PKX4|DOK6_HUMAN Docking protein 6 OS=Homo sapiens GN=DOK6 PE=1 SV=1;sp|Q2MHE5|DOK6_MOUSE Docking protein 6 OS=Mus musculus GN=Dok6 PE=2 SV=1
DONSON	0.703291	0.567026	0.698101	0.806858	0.568202	0.670246	0.471292	0.686636	0.582063	0.532754	0.58995	0.633468	0.222716	0.120574	0.212188	0.187521	0.257679	0.296665	PREDICTED: protein downstream neighbor of Son [Pelodiscus sinensis]	-	-	-	-	-	-	-	-	sp|Q9NYP3|DONS_HUMAN;gnl|BL_ORD_ID|365700	sp|Q9NYP3|DONS_HUMAN Protein downstream neighbor of Son OS=Homo sapiens GN=DONSON PE=1 SV=2;sp|Q9NYP3|DONS_HUMAN Protein downstream neighbor of Son OS=Homo sapiens GN=DONSON PE=1 SV=2
DPH1	1.34518	1.28398	1.18156	1.42553	1.48515	1.49443	1.04454	1.06108	1.21059	1.10175	1.12156	1.14364	1.02243	0.993877	1.04376	1.09342	1.00475	1.08279	PREDICTED: diphthamide biosynthesis protein 1 [Pelodiscus sinensis]	-	-	K07561	DPH1,dph2	http://www.genome.jp/dbget-bin/www_bget?ko:K07561	-	-	KOG2648(J)(Diphthamide biosynthesis protein)	sp|Q5ZHX9|DPH1_CHICK;sp|Q6GPQ5|DPH1_XENLA;gnl|BL_ORD_ID|366591	sp|Q5ZHX9|DPH1_CHICK 2-(3-amino-3-carboxypropyl)histidine synthase subunit 1 OS=Gallus gallus GN=DPH1 PE=2 SV=1;sp|Q6GPQ5|DPH1_XENLA 2-(3-amino-3-carboxypropyl)histidine synthase subunit 1 OS=Xenopus laevis GN=dph1 PE=2 SV=2;sp|Q5ZHX9|DPH1_CHICK 2-(3-amino-3-carboxypropyl)histidine synthase subunit 1 OS=Gallus gallus GN=DPH1 PE=2 SV=1
DPH7	1.19117	1.44311	1.06707	1.31323	1.28194	1.13513	0.989005	0.956168	1.07078	1.10585	1.03463	1.11628	0.561101	0.837588	1.00389	0.851258	0.790988	0.941014	PREDICTED: diphthine methyltransferase isoform X1 [Pelodiscus sinensis]<>XP_006117417.1 PREDICTED: diphthine methyltransferase isoform X1 [Pelodiscus sinensis];PREDICTED: diphthine methyltransferase isoform X2 [Pelodiscus sinensis]	-	-	K17868	DPH7,RRT2	http://www.genome.jp/dbget-bin/www_bget?ko:K17868	-	-	KOG0280(E)(Uncharacterized conserved protein)	sp|Q9BTV6|DPH7_HUMAN;gnl|BL_ORD_ID|366599	sp|Q9BTV6|DPH7_HUMAN Diphthine methyltransferase OS=Homo sapiens GN=DPH7 PE=1 SV=2;sp|Q9BTV6|DPH7_HUMAN Diphthine methyltransferase OS=Homo sapiens GN=DPH7 PE=1 SV=2
DPP4	0.716838	0.835691	0.71433	0.453318	0.699838	0.559907	1.0569	0.976808	0.83187	0.955688	0.864511	0.761176	0.669317	0.950365	0.584331	0.635484	0.844477	0.768638	PREDICTED: dipeptidyl peptidase 4 [Pelodiscus sinensis]	GO:0005765;GO:0070062;GO:0042110;GO:0043542;GO:0042802;GO:0030027;GO:0046718;GO:0005886;GO:0016324;GO:0033632;GO:0005102;GO:0008236;GO:0035641;GO:0001662;GO:0030139;GO:0001618;GO:0036343;GO:0008284;GO:0016020;GO:0071438;GO:0010716;GO:0005925;GO:0046581;GO:0042803;GO:0008239;GO:0001666;GO:0002020;GO:0004252	lysosomal membrane;extracellular exosome;T cell activation;endothelial cell migration;identical protein binding;lamellipodium;viral entry into host cell;plasma membrane;apical plasma membrane;regulation of cell-cell adhesion mediated by integrin;receptor binding;serine-type peptidase activity;locomotory exploration behavior;behavioral fear response;endocytic vesicle;virus receptor activity;psycho…	K01278	DPP4	http://www.genome.jp/dbget-bin/www_bget?ko:K01278	Protein digestion and absorption	ko04974	KOG2100(O)(Dipeptidyl aminopeptidase)	sp|Q9N2I7|DPP4_FELCA;sp|P22411|DPP4_PIG;gnl|BL_ORD_ID|362525;sp|P27487|DPP4_HUMAN	sp|Q9N2I7|DPP4_FELCA Dipeptidyl peptidase 4 OS=Felis catus GN=DPP4 PE=2 SV=1;sp|P22411|DPP4_PIG Dipeptidyl peptidase 4 OS=Sus scrofa GN=DPP4 PE=1 SV=3;sp|P27487|DPP4_HUMAN Dipeptidyl peptidase 4 OS=Homo sapiens GN=DPP4 PE=1 SV=2;sp|P27487|DPP4_HUMAN Dipeptidyl peptidase 4 OS=Homo sapiens GN=DPP4 PE=1 SV=2
DPP6	0.900913	0.810233	0.767156	1.02612	0.929419	0.895423	0.772322	0.891537	0.85187	0.978181	1.00775	0.956168	0.181844	0.326336	0.294466	0.326336	0.344392	0.534026	PREDICTED: dipeptidyl aminopeptidase-like protein 6 isoform X1 [Pelodiscus sinensis];PREDICTED: dipeptidyl aminopeptidase-like protein 6 isoform X2 [Pelodiscus sinensis]	GO:0070062;GO:0008076;GO:0008236;GO:1901379;GO:0016021;GO:0016020;GO:0006508;GO:0015459	extracellular exosome;voltage-gated potassium channel complex;serine-type peptidase activity;regulation of potassium ion transmembrane transport;integral component of membrane;membrane;proteolysis;potassium channel regulator activity	-	-	-	-	-	KOG2100(O)(Dipeptidyl aminopeptidase)	sp|Q5IS50|DPP6_PANTR;sp|P46101|DPP6_RAT;gnl|BL_ORD_ID|367352	sp|Q5IS50|DPP6_PANTR Dipeptidyl aminopeptidase-like protein 6 OS=Pan troglodytes GN=DPP6 PE=2 SV=1;sp|P46101|DPP6_RAT Dipeptidyl aminopeptidase-like protein 6 OS=Rattus norvegicus GN=Dpp6 PE=1 SV=1;sp|Q5IS50|DPP6_PANTR Dipeptidyl aminopeptidase-like protein 6 OS=Pan troglodytes GN=DPP6 PE=2 SV=1
DPY19L1	0.991226	1.18752	1.10653	1.05423	0.96708	1.06744	1.04454	1.06408	1.11294	1.05385	1.05538	1.01787	0.687529	0.583199	0.594393	0.683047	0.716003	0.770852	PREDICTED: probable C-mannosyltransferase DPY19L1 isoform X1 [Pelodiscus sinensis];PREDICTED: probable C-mannosyltransferase DPY19L1 isoform X2 [Pelodiscus sinensis];PREDICTED: probable C-mannosyltransferase DPY19L1 isoform X2 [Chrysemys picta bellii]	GO:0016021;GO:0016020	integral component of membrane;membrane	-	-	-	-	-	KOG4587(S)(Predicted membrane protein)	gnl|BL_ORD_ID|350536;sp|A6X919|D19L1_MOUSE;sp|Q2PZI1|D19L1_HUMAN	sp|Q2PZI1|D19L1_HUMAN Probable C-mannosyltransferase DPY19L1 OS=Homo sapiens GN=DPY19L1 PE=2 SV=1;sp|A6X919|D19L1_MOUSE Probable C-mannosyltransferase DPY19L1 OS=Mus musculus GN=Dpy19l1 PE=1 SV=1;sp|Q2PZI1|D19L1_HUMAN Probable C-mannosyltransferase DPY19L1 OS=Homo sapiens GN=DPY19L1 PE=2 SV=1
DPY19L3	0.893207	1.00346	1.00173	0.936011	0.926857	1.04883	0.846337	0.783904	0.891537	0.840106	0.85187	0.928396	0.480007	0.428135	0.478566	0.673942	0.495544	0.724276	PREDICTED: probable C-mannosyltransferase DPY19L3 isoform X3 [Pelodiscus sinensis];PREDICTED: probable C-mannosyltransferase DPY19L3 isoform X2 [Pelodiscus sinensis];PREDICTED: probable C-mannosyltransferase DPY19L3 isoform X4 [Pelodiscus sinensis];PREDICTED: probable C-mannosyltransferase DPY19L3 isoform X1 [Pelodiscus sinensis]	-	-	-	-	-	-	-	KOG4587(S)(Predicted membrane protein)	sp|Q6ZPD9|D19L3_HUMAN;gnl|BL_ORD_ID|348343	sp|Q6ZPD9|D19L3_HUMAN Probable C-mannosyltransferase DPY19L3 OS=Homo sapiens GN=DPY19L3 PE=2 SV=1;sp|Q6ZPD9|D19L3_HUMAN Probable C-mannosyltransferase DPY19L3 OS=Homo sapiens GN=DPY19L3 PE=2 SV=1
DPY19L4	0.716003	0.820858	0.793092	0.661813	0.62941	0.790988	0.980003	0.902003	0.925828	1.04727	0.961421	1.05994	0.650308	0.790988	0.693727	0.729165	0.675778	0.770115	PREDICTED: probable C-mannosyltransferase DPY19L4 isoform X1 [Pelodiscus sinensis];PREDICTED: probable C-mannosyltransferase DPY19L4 isoform X2 [Pelodiscus sinensis]<>XP_006134135.1 PREDICTED: probable C-mannosyltransferase DPY19L4 isoform X2 [Pelodiscus sinensis];PREDICTED: probable C-mannosyltransferase DPY19L4 isoform X3 [Pelodiscus sinensis]	GO:0005637;GO:0016021;GO:0016020;GO:0018406;GO:0000030	nuclear inner membrane;integral component of membrane;membrane;protein C-linked glycosylation via 2'-alpha-mannosyl-L-tryptophan;mannosyltransferase activity	-	-	-	-	-	KOG4587(S)(Predicted membrane protein)	gnl|BL_ORD_ID|350537;gnl|BL_ORD_ID|353019;sp|A2AJQ3|D19L4_MOUSE;sp|Q7Z388|D19L4_HUMAN;sp|Q5R8N9|D19L4_PONAB	sp|Q5R8N9|D19L4_PONAB Probable C-mannosyltransferase DPY19L4 OS=Pongo abelii GN=DPY19L4 PE=2 SV=2;sp|Q7Z388|D19L4_HUMAN Probable C-mannosyltransferase DPY19L4 OS=Homo sapiens GN=DPY19L4 PE=1 SV=1;sp|A2AJQ3|D19L4_MOUSE Probable C-mannosyltransferase DPY19L4 OS=Mus musculus GN=Dpy19l4 PE=2 SV=1;sp|Q7Z388|D19L4_HUMAN Probable C-mannosyltransferase DPY19L4 OS=Homo sapiens GN=DPY19L4 PE=1 SV=1;sp|Q5R8…
DSEL	0.176091	0.220108	0.10721	0.264818	0.235528	0.120574	0.562293	0.322219	0.324282	0.451786	0.399674	0.499687	0.127105	0.155336	0.146128	0.187521	0.127105	0.193125	PREDICTED: dermatan-sulfate epimerase-like protein [Pelodiscus sinensis]	GO:0047757;GO:0008146;GO:0030205;GO:0016021;GO:0016020;GO:0030204	chondroitin-glucuronate 5-epimerase activity;sulfotransferase activity;dermatan sulfate metabolic process;integral component of membrane;membrane;chondroitin sulfate metabolic process	-	-	-	-	-	-	gnl|BL_ORD_ID|364490;sp|Q8IZU8|DSEL_HUMAN	sp|Q8IZU8|DSEL_HUMAN Dermatan-sulfate epimerase-like protein OS=Homo sapiens GN=DSEL PE=2 SV=2;sp|Q8IZU8|DSEL_HUMAN Dermatan-sulfate epimerase-like protein OS=Homo sapiens GN=DSEL PE=2 SV=2
DTX1	0.448706	0.502427	0.487138	1.07809	1.16376	0.928396	0.636488	0.506505	0.730782	0.758155	0.797268	0.798651	0.460898	0.212188	0.296665	0.472756	0.704151	0.549003	PREDICTED: E3 ubiquitin-protein ligase DTX1 isoform X1 [Chrysemys picta bellii]	-	-	K06058	DTX	http://www.genome.jp/dbget-bin/www_bget?ko:K06058	Notch signaling pathway	ko04330	-	gnl|BL_ORD_ID|369590	sp|Q86Y01|DTX1_HUMAN E3 ubiquitin-protein ligase DTX1 OS=Homo sapiens GN=DTX1 PE=1 SV=1
DUSP15	0.348305	0.283301	0.416641	0.627366	0.622214	0.565848	0.359835	0.271842	0.459392	0.436163	0.290035	0.374748	0.178977	0.173186	0.09691	0.212188	0.0569049	0.298853	PREDICTED: dual specificity protein phosphatase 15 [Pelodiscus sinensis]	-	-	K14165	K14165	http://www.genome.jp/dbget-bin/www_bget?ko:K14165	-	-	KOG1716(V)(Dual specificity phosphatase)	sp|Q8R4V2|DUS15_MOUSE;gnl|BL_ORD_ID|370184	sp|Q8R4V2|DUS15_MOUSE Dual specificity protein phosphatase 15 OS=Mus musculus GN=Dusp15 PE=2 SV=3;sp|Q8R4V2|DUS15_MOUSE Dual specificity protein phosphatase 15 OS=Mus musculus GN=Dusp15 PE=2 SV=3
DUSP3	0.521138	0.717671	0.687529	0.746634	0.733197	0.658965	0.553883	0.716003	0.80618	0.778874	0.834421	0.723456	0.860937	0.622214	0.641474	0.927883	0.810904	0.971276	PREDICTED: dual specificity protein phosphatase 3 [Pelodiscus sinensis]<>XP_006125775.1 PREDICTED: dual specificity protein phosphatase 3 [Pelodiscus sinensis]<>XP_014430388.1 PREDICTED: dual specificity protein phosphatase 3 [Pelodiscus sinensis];PREDICTED: sclerostin [Pelodiscus sinensis]	GO:0005737;GO:0070062;GO:0005654;GO:0031333;GO:0071374;GO:0033549;GO:0045893;GO:0046329;GO:0031012;GO:0045931;GO:0004725;GO:0019901;GO:0050860;GO:0070373;GO:0005829;GO:0043409;GO:2000054;GO:0000188;GO:0016791;GO:0090090;GO:0001772;GO:0050868;GO:0008134;GO:0005615;GO:0016787;GO:0004721;GO:0009612;GO:0008138;GO:0030514;GO:0035335;GO:0006470;GO:0016311;GO:0005634;GO:0030279	cytoplasm;extracellular exosome;nucleoplasm;negative regulation of protein complex assembly;cellular response to parathyroid hormone stimulus;MAP kinase phosphatase activity;positive regulation of transcription, DNA-templated;negative regulation of JNK cascade;extracellular matrix;positive regulation of mitotic cell cycle;protein tyrosine phosphatase activity;protein kinase binding;negative regul…	K16834;K17614	SOST;DUSP3,VHR	http://www.genome.jp/dbget-bin/www_bget?ko:K16834;http://www.genome.jp/dbget-bin/www_bget?ko:K17614	MAPK signaling pathway;Wnt signaling pathway	ko04010,ko04310	KOG1716(V)(Dual specificity phosphatase)	gnl|BL_ORD_ID|364566;sp|Q5RD73|DUS3_PONAB	sp|Q5RD73|DUS3_PONAB Dual specificity protein phosphatase 3 OS=Pongo abelii GN=DUSP3 PE=2 SV=1;sp|Q5RD73|DUS3_PONAB Dual specificity protein phosphatase 3 OS=Pongo abelii GN=DUSP3 PE=2 SV=1
DVL1	0.720986	0.834421	0.80618	0.577492	0.733197	0.732394	0.974051	0.919078	0.897077	1.02979	0.972203	0.937016	0.821514	0.880814	0.745075	0.874482	0.779596	0.845098	PREDICTED: segment polarity protein dishevelled homolog DVL-1 isoform X3 [Pelodiscus sinensis];PREDICTED: segment polarity protein dishevelled homolog DVL-1 isoform X1 [Pelodiscus sinensis];PREDICTED: segment polarity protein dishevelled homolog DVL-1 isoform X2 [Pelodiscus sinensis]	-	-	K02353	DVL	http://www.genome.jp/dbget-bin/www_bget?ko:K02353	Signaling pathways regulating pluripotency of stem cells;Hippo signaling pathway;Notch signaling pathway;Wnt signaling pathway;mTOR signaling pathway;Melanogenesis	ko04550,ko04390,ko04330,ko04310,ko04150,ko04916	KOG0708(F)(Membrane-associated guanylate kinase MAGUK (contains PDZ, SH3, HOOK and GUK domains))	sp|Q5IS48|DVL1_PANTR;gnl|BL_ORD_ID|371609;sp|O14640|DVL1_HUMAN;gnl|BL_ORD_ID|364633	sp|Q5IS48|DVL1_PANTR Segment polarity protein dishevelled homolog DVL-1 OS=Pan troglodytes GN=DVL1 PE=2 SV=1;sp|O14640|DVL1_HUMAN Segment polarity protein dishevelled homolog DVL-1 OS=Homo sapiens GN=DVL1 PE=1 SV=2;sp|O14640|DVL1_HUMAN Segment polarity protein dishevelled homolog DVL-1 OS=Homo sapiens GN=DVL1 PE=1 SV=2;sp|Q5IS48|DVL1_PANTR Segment polarity protein dishevelled homolog DVL-1 OS=Pan…
DYDC2	0.996074	0.974512	0.78746	0.575188	1.01787	0.600973	1.17725	0.993877	1.03623	1.0976	0.877947	1.0026	1.08386	1.14301	1.09061	1.1245	0.993436	1.14395	hypothetical protein Y1Q_0005248 [Alligator mississippiensis];PREDICTED: DPY30 domain-containing protein 2 isoform X2 [Pelodiscus sinensis];PREDICTED: exosome complex component RRP40 [Pelodiscus sinensis];PREDICTED: DPY30 domain-containing protein 2 isoform X1 [Pelodiscus sinensis]<>XP_006129985.1 PREDICTED: DPY30 domain-containing protein 2 isoform X1 [Pelodiscus sinensis]<>XP_014432437.1 PREDIC…	-	-	K03681	RRP40,EXOSC3	http://www.genome.jp/dbget-bin/www_bget?ko:K03681	RNA degradation	ko03018	KOG1004(J)(Exosomal 3'-5' exoribonuclease complex subunit Rrp40)	sp|Q3T0E1|EXOS3_BOVIN;gnl|BL_ORD_ID|368857	sp|Q3T0E1|EXOS3_BOVIN Exosome complex component RRP40 OS=Bos taurus GN=EXOSC3 PE=2 SV=1;sp|Q96IM9|DYDC2_HUMAN DPY30 domain-containing protein 2 OS=Homo sapiens GN=DYDC2 PE=2 SV=1
DYNC2H1	0.951338	1.06032	0.996074	0.846337	0.781037	0.860338	0.838219	0.774517	0.829947	0.802774	0.766413	0.783189	0.644439	0.555094	0.571709	0.801404	0.777427	0.666518	PREDICTED: cytoplasmic dynein 2 heavy chain 1 [Anolis carolinensis];PREDICTED: LOW QUALITY PROTEIN: cytoplasmic dynein 2 heavy chain 1 [Pelodiscus sinensis];PREDICTED: cytoplasmic dynein 2 heavy chain 1 [Apteryx australis mantelli]	GO:0005524;GO:0030286;GO:0000166;GO:0016887;GO:0003777;GO:0007018	ATP binding;dynein complex;nucleotide binding;ATPase activity;microtubule motor activity;microtubule-based movement	K10414	DYNC2H,DNCH2	http://www.genome.jp/dbget-bin/www_bget?ko:K10414	Phagosome;Vasopressin-regulated water reabsorption	ko04145,ko04962	KOG3595(Z)(Dyneins, heavy chain)	sp|Q8NCM8|DYHC2_HUMAN;gnl|BL_ORD_ID|365942	sp|Q8NCM8|DYHC2_HUMAN Cytoplasmic dynein 2 heavy chain 1 OS=Homo sapiens GN=DYNC2H1 PE=1 SV=4;sp|Q8NCM8|DYHC2_HUMAN Cytoplasmic dynein 2 heavy chain 1 OS=Homo sapiens GN=DYNC2H1 PE=1 SV=4
DYSF	0.33646	0.214844	0.498311	0.752816	0.649335	0.649335	0.481443	0.448706	0.565848	0.552668	0.55145	0.586587	0.730782	0.891537	1.37803	0.403121	0.271842	0.80618	PREDICTED: LOW QUALITY PROTEIN: dysferlin [Pelodiscus sinensis]	-	-	K18261	DYSF	http://www.genome.jp/dbget-bin/www_bget?ko:K18261	-	-	KOG1028(TU)(Ca2+-dependent phospholipid-binding protein Synaptotagmin, required for synaptic vesicle and secretory granule exocytosis);KOG1326(M)(Membrane-associated protein FER-1 and related ferlins, contain multiple C2 domains)	sp|A6QQP7|DYSF_BOVIN;sp|O75923|DYSF_HUMAN;gnl|BL_ORD_ID|375561	sp|A6QQP7|DYSF_BOVIN Dysferlin OS=Bos taurus GN=DYSF PE=2 SV=1;sp|O75923|DYSF_HUMAN Dysferlin OS=Homo sapiens GN=DYSF PE=1 SV=1;sp|A6QQP7|DYSF_BOVIN Dysferlin OS=Bos taurus GN=DYSF PE=2 SV=1
E2F7	0.768638	0.841985	0.750508	0.757396	0.661813	0.690196	0.521138	0.643453	0.675778	0.631444	0.621176	0.638489	0.359835	0.264818	0.359835	0.247973	0.416641	0.350248	PREDICTED: transcription factor E2F7 isoform X1 [Pelodiscus sinensis];PREDICTED: transcription factor E2F7 isoform X2 [Pelodiscus sinensis]	GO:0008285;GO:0060718;GO:0042802;GO:0003677;GO:2000134;GO:0000122;GO:0030330;GO:0003714;GO:0005667;GO:0001227;GO:0045944;GO:0000977;GO:0002040;GO:0070365;GO:0006351;GO:0071930;GO:0003700;GO:0001047;GO:0005634	negative regulation of cell proliferation;chorionic trophoblast cell differentiation;identical protein binding;DNA binding;negative regulation of G1/S transition of mitotic cell cycle;negative regulation of transcription from RNA polymerase II promoter;DNA damage response, signal transduction by p53 class mediator;transcription corepressor activity;transcription factor complex;transcriptional rep…	K09391	E2F7_8	http://www.genome.jp/dbget-bin/www_bget?ko:K09391	-	-	KOG2578(K)(Transcription factor E2F/dimerization partner (TDP)-like proteins)	sp|Q96AV8|E2F7_HUMAN;gnl|BL_ORD_ID|371011	sp|Q96AV8|E2F7_HUMAN Transcription factor E2F7 OS=Homo sapiens GN=E2F7 PE=1 SV=3;sp|Q96AV8|E2F7_HUMAN Transcription factor E2F7 OS=Homo sapiens GN=E2F7 PE=1 SV=3
EBF1	0.526339	0.404834	0.434569	0.692847	0.603144	0.571709	0.623249	0.55145	0.639486	0.632457	0.600973	0.904174	0.255273	0.252853	0.378398	0.267172	0.247973	0.257679	PREDICTED: transcription factor COE1 [Mesitornis unicolor];PREDICTED: transcription factor COE1 [Calidris pugnax];PREDICTED: transcription factor COE1 [Pelodiscus sinensis];transcription factor COE1 isoform 3 [Mus musculus]<>BAE23864.1 unnamed protein product [Mus musculus];PREDICTED: transcription factor COE1-like [Gekko japonicus]	GO:0003677;GO:0045893;GO:0001077;GO:0070742;GO:0007275;GO:0000978;GO:0045944;GO:0006351;GO:0005515;GO:0003700;GO:0006355;GO:0005634;GO:0006366;GO:0046872	DNA binding;positive regulation of transcription, DNA-templated;transcriptional activator activity, RNA polymerase II core promoter proximal region sequence-specific binding;C2H2 zinc finger domain binding;multicellular organism development;RNA polymerase II core promoter proximal region sequence-specific DNA binding;positive regulation of transcription from RNA polymerase II promoter;transcripti…	K09103	EBF,COE	http://www.genome.jp/dbget-bin/www_bget?ko:K09103	-	-	KOG3836(K)(HLH transcription factor EBF/Olf-1 and related DNA binding proteins)	sp|Q63398|COE1_RAT;gnl|BL_ORD_ID|336523;sp|Q9UH73|COE1_HUMAN;sp|Q07802|COE1_MOUSE	sp|Q63398|COE1_RAT Transcription factor COE1 OS=Rattus norvegicus GN=Ebf1 PE=1 SV=2;sp|Q07802|COE1_MOUSE Transcription factor COE1 OS=Mus musculus GN=Ebf1 PE=1 SV=1;sp|Q9UH73|COE1_HUMAN Transcription factor COE1 OS=Homo sapiens GN=EBF1 PE=1 SV=2;sp|Q07802|COE1_MOUSE Transcription factor COE1 OS=Mus musculus GN=Ebf1 PE=1 SV=1
EBF2	0.372912	0.305351	0.418301	0.593286	0.451786	0.423246	0.517196	0.561101	0.40824	0.491362	0.572872	0.82866	0.0293838	0.0413927	0.0293838	0.049218	0.045323	0.0606978	PREDICTED: transcription factor COE2 isoform X1 [Pelodiscus sinensis];PREDICTED: transcription factor COE2 isoform X2 [Pelodiscus sinensis]	GO:0000978;GO:0045944;GO:0050873;GO:0003677;GO:0045893;GO:0001709;GO:0006351;GO:0001077;GO:0003682;GO:0007275;GO:0006355;GO:0035563;GO:0005634;GO:0060612;GO:0006366;GO:0046872	RNA polymerase II core promoter proximal region sequence-specific DNA binding;positive regulation of transcription from RNA polymerase II promoter;brown fat cell differentiation;DNA binding;positive regulation of transcription, DNA-templated;cell fate determination;transcription, DNA-templated;transcriptional activator activity, RNA polymerase II core promoter proximal region sequence-specific bi…	K09103	EBF,COE	http://www.genome.jp/dbget-bin/www_bget?ko:K09103	-	-	KOG3836(K)(HLH transcription factor EBF/Olf-1 and related DNA binding proteins)	gnl|BL_ORD_ID|319688;sp|Q08DL5|COE2_BOVIN;sp|O08792|COE2_MOUSE	sp|O08792|COE2_MOUSE Transcription factor COE2 OS=Mus musculus GN=Ebf2 PE=1 SV=4;sp|Q08DL5|COE2_BOVIN Transcription factor COE2 OS=Bos taurus GN=EBF2 PE=2 SV=1;sp|O08792|COE2_MOUSE Transcription factor COE2 OS=Mus musculus GN=Ebf2 PE=1 SV=4
EBF3	0.240549	0.133539	0.178977	0.477121	0.278754	0.255273	0.503791	0.350248	0.178977	0.296665	0.423246	0.608526	0.0606978	0.0334238	0.064458	0.049218	0.167317	0.00860017	PREDICTED: transcription factor COE3 isoform X6 [Gekko japonicus];PREDICTED: transcription factor COE3 isoform X1 [Pelodiscus sinensis];hypothetical protein Y1Q_0012881 [Alligator mississippiensis];PREDICTED: transcription factor COE3 isoform X3 [Pelodiscus sinensis];PREDICTED: transcription factor COE3 isoform X3 [Pseudopodoces humilis];PREDICTED: transcription factor COE3 isoform X1 [Ficedula a…	GO:0003677;GO:0045893;GO:0001077;GO:0007275;GO:0000978;GO:0045944;GO:0006351;GO:0005515;GO:0006355;GO:0005634;GO:0006366;GO:0046872	DNA binding;positive regulation of transcription, DNA-templated;transcriptional activator activity, RNA polymerase II core promoter proximal region sequence-specific binding;multicellular organism development;RNA polymerase II core promoter proximal region sequence-specific DNA binding;positive regulation of transcription from RNA polymerase II promoter;transcription, DNA-templated;protein bindin…	K09103	EBF,COE	http://www.genome.jp/dbget-bin/www_bget?ko:K09103	-	-	KOG3836(K)(HLH transcription factor EBF/Olf-1 and related DNA binding proteins)	gnl|BL_ORD_ID|336524;sp|O73742|COE3_XENLA;gnl|BL_ORD_ID|317579;sp|O08791|COE3_MOUSE	sp|O73742|COE3_XENLA Transcription factor COE3 OS=Xenopus laevis GN=coe3 PE=2 SV=2;sp|O73742|COE3_XENLA Transcription factor COE3 OS=Xenopus laevis GN=coe3 PE=2 SV=2;sp|O08791|COE3_MOUSE Transcription factor COE3 OS=Mus musculus GN=Ebf3 PE=2 SV=1;sp|O08791|COE3_MOUSE Transcription factor COE3 OS=Mus musculus GN=Ebf3 PE=2 SV=1
ECHDC3	1.02078	1.13226	0.849419	0.851258	0.865104	0.920123	1.03902	0.917506	1.08243	1.13001	0.924279	0.992554	0.940018	1.15594	1.06558	0.910624	0.873321	0.959518	PREDICTED: enoyl-CoA hydratase domain-containing protein 3, mitochondrial [Pelodiscus sinensis]	-	-	-	-	-	-	-	KOG1680(I)(Enoyl-CoA hydratase);KOG1683(I)(Hydroxyacyl-CoA dehydrogenase/enoyl-CoA hydratase)	gnl|BL_ORD_ID|369010;sp|A9JS71|ECHD3_XENLA	sp|Q3MIE0|ECHD3_RAT Enoyl-CoA hydratase domain-containing protein 3, mitochondrial OS=Rattus norvegicus GN=Echdc3 PE=2 SV=1;sp|A9JS71|ECHD3_XENLA Enoyl-CoA hydratase domain-containing protein 3, mitochondrial OS=Xenopus laevis GN=echdc3 PE=2 SV=1
[truncated: 1,777 more rows]
